# Supplementary material for: Screening of polymer types and chemical weathering in macro- and meso-plastics found on lake and river beaches using a combined chemometric approach
Source: Royal Society of Chemistry journal article supplement (doi:10.1039/d2ay01201d), 2022-01-01
Supplement: d2ay01201d1.xlsx [file d2ay01201d1.xlsx]

## Sheet: EuclideanFurthestNeighbor
	LB-1	LB-2	LB-4	LB-5	LB-6	LB-7	LB-8	LB-9	LB-10	LB-11	LB-12	LB-13	LB-14	LB-15	LB-17	LB-20	LB-21	LB-22	LB-23	LB-24	LB-25	LB-26	LB-27	LB-28	LB-29	LB-30	LB-31	LB-32	LB-35	LB-36	LB-37	LB-38	LB-39	LB-40	LB-41	LB-42	LB-43	LB-44	LB-45	LB-46	LB-48	LB-49	LB-50	LB-51	LB-52	LB-53	LB-54	LB-55	LB-56
LB-1	0	0.83498	0.29496	2.1892	0.78282	0.9593	1.18926	0.68178	0.5332	0.51281	0.66447	0.57523	2.96236	3.00274	0.31312	0.46595	0.25627	0.91544	0.46215	0.94265	1.05401	1.11876	0.63251	1.61962	0.74204	3.1442	1.42195	3.02494	1.59115	0.30375	0.34516	0.85566	3.03899	0.93141	0.28591	1.05287	0.37069	1.80293	2.91169	1.11751	3.04979	2.0237	2.42169	1.54985	1.40242	1.59178	1.15342	2.5221	2.40221
LB-2	0.83498	0	0.72442	1.62384	0.57022	0.28544	0.46264	0.27772	0.59967	0.63267	0.50924	0.65717	2.45392	2.51335	0.81119	0.45375	0.75322	0.31462	0.59655	0.84242	0.38795	0.91209	0.35436	0.86563	0.50774	2.69499	0.97996	2.53703	0.83813	0.65839	0.66083	0.42691	2.55267	0.29752	0.65861	0.32508	0.82185	1.04137	2.40261	0.46398	2.57177	1.26644	1.71185	0.78104	0.67308	0.85225	0.42387	1.87646	1.70936
LB-4	0.29496	0.72442	0	2.10825	0.69378	0.85956	1.08494	0.58409	0.47939	0.30135	0.6055	0.54802	2.91816	2.96258	0.21042	0.39826	0.18062	0.76286	0.44489	0.89088	0.96257	1.0924	0.48515	1.52094	0.65135	3.10791	1.36668	2.98384	1.50199	0.29071	0.33878	0.79314	2.99819	0.86323	0.32645	0.95456	0.32745	1.71202	2.86504	1.02065	3.0095	1.93113	2.34786	1.43132	1.29806	1.50333	1.04974	2.45939	2.33124
LB-5	2.1892	1.62384	2.10825	0	1.7561	1.54929	1.40437	1.73067	1.92496	1.9921	1.76278	1.91906	2.22968	2.28528	2.17829	1.87187	2.12666	1.62123	1.93444	1.75764	1.49458	1.9299	1.77896	1.26366	1.74959	2.43396	1.52593	2.28158	1.27889	2.03293	1.99856	1.61082	2.30588	1.56945	2.0239	1.46423	2.18305	1.29814	2.13365	1.44655	2.36473	1.29406	1.47206	1.31679	1.325	1.25965	1.45642	1.60241	1.23643
LB-6	0.78282	0.57022	0.69378	1.7561	0	0.50801	0.67745	0.52962	0.34151	0.57212	0.26595	0.33091	2.3928	2.4537	0.70161	0.52859	0.67775	0.59812	0.39411	0.44569	0.58197	1.01534	0.50445	1.13035	0.21755	2.56317	1.05514	2.43388	1.14729	0.60356	0.51983	0.29988	2.46786	0.63815	0.56705	0.67011	0.75085	1.36774	2.36259	0.5503	2.49663	1.55284	1.88359	1.11079	0.87776	1.06016	0.70743	1.93173	1.95258
LB-7	0.9593	0.28544	0.85956	1.54929	0.50801	0	0.2824	0.37514	0.61576	0.74061	0.49467	0.65927	2.28621	2.35072	0.93313	0.57979	0.86613	0.33221	0.6331	0.77715	0.17171	0.97704	0.46318	0.71654	0.43939	2.52516	0.94711	2.3611	0.707	0.77191	0.73874	0.31978	2.38547	0.22905	0.74775	0.25257	0.94513	0.9309	2.24229	0.26303	2.41071	1.13828	1.5548	0.68226	0.52393	0.69772	0.27166	1.70231	1.60475
LB-8	1.18926	0.46264	1.08494	1.40437	0.67745	0.2824	0	0.59154	0.83263	0.95326	0.68592	0.86987	2.13211	2.20281	1.16332	0.79822	1.09232	0.4625	0.85853	0.89564	0.24088	1.07003	0.68394	0.49642	0.63042	2.38342	0.94206	2.21089	0.50571	1.00244	0.96103	0.4873	2.23726	0.38834	0.98227	0.26516	1.17885	0.72544	2.08802	0.2455	2.26446	0.92064	1.33095	0.51259	0.36313	0.49079	0.21168	1.49674	1.39343
LB-9	0.68178	0.27772	0.58409	1.73067	0.52962	0.37514	0.59154	0	0.4723	0.54107	0.42976	0.54854	2.53583	2.58949	0.6764	0.31559	0.59756	0.39239	0.46228	0.81191	0.47968	0.93603	0.28888	1.0126	0.4574	2.76412	1.06056	2.61448	0.98044	0.51171	0.51343	0.43605	2.62984	0.34923	0.50007	0.44842	0.70172	1.19146	2.48396	0.56825	2.64585	1.42043	1.84833	0.94571	0.82233	1.00178	0.55927	1.99302	1.84785
LB-10	0.5332	0.59967	0.47939	1.92496	0.34151	0.61576	0.83263	0.4723	0	0.46701	0.25583	0.21797	2.59241	2.64219	0.48248	0.38157	0.45072	0.6619	0.17819	0.57441	0.71217	1.0178	0.4621	1.29959	0.32196	2.76233	1.16277	2.64003	1.29413	0.39733	0.30058	0.48169	2.66794	0.68091	0.33576	0.76598	0.56008	1.51957	2.55145	0.75575	2.68841	1.7259	2.08323	1.26943	1.06543	1.26138	0.83708	2.14853	2.12969
LB-11	0.51281	0.63267	0.30135	1.9921	0.57212	0.74061	0.95326	0.54107	0.46701	0	0.53417	0.50902	2.77521	2.82617	0.37029	0.425	0.36277	0.63842	0.43874	0.76402	0.83321	1.06872	0.38692	1.3854	0.52091	2.96688	1.27729	2.83704	1.38508	0.39773	0.39343	0.68011	2.85594	0.79036	0.43481	0.85542	0.42541	1.5947	2.72674	0.87277	2.87181	1.79985	2.20687	1.28713	1.14847	1.36206	0.9293	2.31127	2.2211
LB-12	0.66447	0.50924	0.6055	1.76278	0.26595	0.49467	0.68592	0.42976	0.25583	0.53417	0	0.26516	2.44683	2.50076	0.6351	0.3993	0.58992	0.60151	0.27606	0.47972	0.57717	0.96639	0.46294	1.14962	0.26076	2.6227	1.04147	2.49492	1.14881	0.50878	0.38242	0.33626	2.52584	0.5824	0.45632	0.63694	0.69011	1.37145	2.41333	0.6055	2.54916	1.57321	1.9184	1.1337	0.91668	1.10144	0.71788	1.98081	1.96317
LB-13	0.57523	0.65717	0.54802	1.91906	0.33091	0.65927	0.86987	0.54854	0.21797	0.50902	0.26516	0	2.54704	2.59749	0.53059	0.43961	0.52075	0.72237	0.19695	0.48044	0.74702	0.99725	0.52008	1.32946	0.33965	2.70612	1.14325	2.58674	1.32939	0.41373	0.31959	0.46882	2.62063	0.73663	0.39085	0.81853	0.56152	1.55133	2.51929	0.77415	2.64321	1.75145	2.08299	1.29894	1.07871	1.27343	0.88558	2.12518	2.14576
LB-14	2.96236	2.45392	2.91816	2.22968	2.3928	2.28621	2.13211	2.53583	2.59241	2.77521	2.44683	2.54704	0	0.25471	2.96039	2.66669	2.91378	2.46357	2.61631	2.27761	2.2276	2.61279	2.6216	2.00978	2.40389	0.53056	2.31637	0.3301	2.0707	2.79997	2.71939	2.29862	0.25724	2.36717	2.78334	2.29139	2.95669	2.0517	0.66518	2.13593	0.25714	1.97508	1.34692	2.1417	2.02593	1.94466	2.22111	0.89543	2.10717
LB-15	3.00274	2.51335	2.96258	2.28528	2.4537	2.35072	2.20281	2.58949	2.64219	2.82617	2.50076	2.59749	0.25471	0	3.00459	2.71671	2.95881	2.52433	2.66516	2.32748	2.29464	2.66462	2.67668	2.0898	2.46423	0.47875	2.38162	0.34784	2.14693	2.84519	2.76387	2.36195	0.2245	2.42826	2.8309	2.35633	3.00075	2.1304	0.58342	2.20698	0.27615	2.05889	1.43721	2.21615	2.10218	2.0288	2.28916	0.99378	2.16913
LB-17	0.31312	0.81119	0.21042	2.17829	0.70161	0.93313	1.16332	0.6764	0.48248	0.37029	0.6351	0.53059	2.96039	3.00459	0	0.48188	0.2316	0.84425	0.46186	0.88483	1.0414	1.11144	0.5595	1.61103	0.68687	3.13701	1.40932	3.01913	1.59519	0.30515	0.37918	0.83324	3.03556	0.95325	0.35728	1.0451	0.26953	1.80699	2.91104	1.09011	3.0489	2.02364	2.42913	1.52083	1.37123	1.58203	1.12853	2.52396	2.42071
LB-20	0.46595	0.45375	0.39826	1.87187	0.52859	0.57979	0.79822	0.31559	0.38157	0.425	0.3993	0.43961	2.66669	2.71671	0.48188	0	0.41018	0.56552	0.32915	0.76766	0.68311	0.94061	0.32905	1.23621	0.48212	2.87093	1.14903	2.73703	1.20852	0.31143	0.32649	0.52481	2.75335	0.56714	0.32326	0.65711	0.51181	1.4157	2.61876	0.75054	2.76898	1.64394	2.05233	1.16458	1.0246	1.20681	0.78476	2.17114	2.04165
LB-21	0.25627	0.75322	0.18062	2.12666	0.67775	0.86613	1.09232	0.59756	0.45072	0.36277	0.58992	0.52075	2.91378	2.95881	0.2316	0.41018	0	0.78859	0.40936	0.87892	0.96257	1.10691	0.51377	1.52892	0.63068	3.0988	1.3715	2.97586	1.51185	0.28094	0.30878	0.78476	2.99166	0.86217	0.26311	0.96803	0.34692	1.72911	2.85842	1.02214	3.00459	1.9458	2.35489	1.45745	1.30875	1.51268	1.05838	2.45915	2.3455
LB-22	0.91544	0.31462	0.76286	1.62123	0.59812	0.33221	0.4625	0.39239	0.6619	0.63842	0.60151	0.72237	2.46357	2.52433	0.84425	0.56552	0.78859	0	0.67473	0.893	0.41531	0.97116	0.34853	0.83104	0.52494	2.70891	1.04812	2.54668	0.82368	0.71098	0.74445	0.49624	2.56237	0.38451	0.74068	0.38262	0.84183	1.03501	2.40339	0.46775	2.5825	1.24003	1.6996	0.72529	0.64921	0.8431	0.39812	1.87531	1.7024
LB-23	0.46215	0.59655	0.44489	1.93444	0.39411	0.6331	0.85853	0.46228	0.17819	0.43874	0.27606	0.19695	2.61631	2.66516	0.46186	0.32915	0.40936	0.67473	0	0.58816	0.71947	0.99419	0.44155	1.31405	0.34369	2.79054	1.161	2.66561	1.30444	0.31842	0.21044	0.4856	2.69359	0.67176	0.25973	0.7771	0.49566	1.53014	2.57799	0.77267	2.71329	1.73833	2.09985	1.27638	1.08196	1.27279	0.86057	2.16972	2.13773
LB-24	0.94265	0.84242	0.89088	1.75764	0.44569	0.77715	0.89564	0.81191	0.57441	0.76402	0.47972	0.48044	2.27761	2.32748	0.88483	0.76766	0.87892	0.893	0.58816	0	0.82178	1.12329	0.79176	1.31263	0.49648	2.4002	1.09024	2.29692	1.34249	0.80258	0.67007	0.58133	2.33538	0.90728	0.78068	0.91838	0.9141	1.54919	2.25155	0.78085	2.37175	1.71333	1.9421	1.31173	1.05257	1.22872	0.96023	1.91244	2.07393
LB-25	1.05401	0.38795	0.96257	1.49458	0.58197	0.17171	0.24088	0.47968	0.71217	0.83321	0.57717	0.74702	2.2276	2.29464	1.0414	0.68311	0.96257	0.41531	0.71947	0.82178	0	1.03949	0.56802	0.62659	0.50276	2.47042	0.94192	2.29902	0.6222	0.87746	0.82411	0.37838	2.32828	0.26556	0.83792	0.27239	1.05285	0.85541	2.18111	0.21831	2.35679	1.04873	1.46671	0.61909	0.46538	0.61164	0.25414	1.62085	1.51837
LB-26	1.11876	0.91209	1.0924	1.9299	1.01534	0.97704	1.07003	0.93603	1.0178	1.06872	0.96639	0.99725	2.61279	2.66462	1.11144	0.94061	1.10691	0.97116	0.99419	1.12329	1.03949	0	0.94068	1.3561	1.01346	2.83329	0.8702	2.69512	1.32405	0.97876	1.00078	0.93019	2.7086	0.985	1.02966	0.99021	1.07171	1.47966	2.59652	1.05153	2.71307	1.67197	2.01318	1.28419	1.1091	1.25655	1.03415	2.11124	2.03197
LB-27	0.63251	0.35436	0.48515	1.77896	0.50445	0.46318	0.68394	0.28888	0.4621	0.38692	0.46294	0.52008	2.6216	2.67668	0.5595	0.32905	0.51377	0.34853	0.44155	0.79176	0.56802	0.94068	0	1.10126	0.42779	2.84261	1.11803	2.69561	1.08576	0.42873	0.48306	0.47579	2.71118	0.48333	0.46797	0.5627	0.55334	1.2997	2.56661	0.62934	2.73071	1.51359	1.95055	1.0002	0.8804	1.08535	0.63702	2.09087	1.94877
LB-28	1.61962	0.86563	1.52094	1.26366	1.13035	0.71654	0.49642	1.0126	1.29959	1.3854	1.14962	1.32946	2.00978	2.0898	1.61103	1.23621	1.52892	0.83104	1.31405	1.31263	0.62659	1.3561	1.10126	0	1.07583	2.30853	1.11006	2.10494	0.15781	1.44157	1.40871	0.92043	2.13123	0.73788	1.41922	0.62206	1.61382	0.32564	1.96198	0.61487	2.16292	0.45835	0.96384	0.31835	0.41119	0.27031	0.52366	1.24397	1.01482
LB-29	0.74204	0.50774	0.65135	1.74959	0.21755	0.43939	0.63042	0.4574	0.32196	0.52091	0.26076	0.33965	2.40389	2.46423	0.68687	0.48212	0.63068	0.52494	0.34369	0.49648	0.50276	1.01346	0.42779	1.07583	0	2.58959	1.04777	2.45288	1.09062	0.56802	0.47349	0.30246	2.48426	0.55322	0.51578	0.61101	0.72193	1.32176	2.36921	0.51572	2.51205	1.50647	1.85679	1.05642	0.8364	1.03097	0.64716	1.92513	1.93117
LB-30	3.1442	2.69499	3.10791	2.43396	2.56317	2.52516	2.38342	2.76412	2.76233	2.96688	2.6227	2.70612	0.53056	0.47875	3.13701	2.87093	3.0988	2.70891	2.79054	2.4002	2.47042	2.83329	2.84261	2.30853	2.58959	0	2.53634	0.31091	2.3765	2.98851	2.89262	2.5016	0.36393	2.62274	2.96894	2.54561	3.13959	2.37667	0.6927	2.37224	0.50225	2.30969	1.71871	2.44445	2.29654	2.23405	2.48574	1.24183	2.39704
LB-31	1.42195	0.97996	1.36668	1.52593	1.05514	0.94711	0.94206	1.06056	1.16277	1.27729	1.04147	1.14325	2.31637	2.38162	1.40932	1.14903	1.3715	1.04812	1.161	1.09024	0.94192	0.8702	1.11803	1.11006	1.04777	2.53634	0	2.37847	1.10124	1.27216	1.2159	0.94202	2.41659	0.98687	1.25751	0.94037	1.4176	1.2428	2.32033	0.93338	2.43112	1.38277	1.68294	1.12399	0.91105	1.00324	0.95202	1.76424	1.70456
LB-32	3.02494	2.53703	2.98384	2.28158	2.43388	2.3611	2.21089	2.61448	2.64003	2.83704	2.49492	2.58674	0.3301	0.34784	3.01913	2.73703	2.97586	2.54668	2.66561	2.29692	2.29902	2.69512	2.69561	2.10494	2.45288	0.31091	2.37847	0	2.1721	2.86385	2.77145	2.35439	0.26259	2.45318	2.8427	2.37788	3.01937	2.16546	0.6412	2.20446	0.39402	2.08647	1.48246	2.24508	2.11089	2.03488	2.30772	1.00652	2.19275
LB-35	1.59115	0.83813	1.50199	1.27889	1.14729	0.707	0.50571	0.98044	1.29413	1.38508	1.14881	1.32939	2.0707	2.14693	1.59519	1.20852	1.51185	0.82368	1.30444	1.34249	0.6222	1.32405	1.08576	0.15781	1.09062	2.3765	1.10124	2.1721	0	1.41821	1.39457	0.91998	2.19385	0.69414	1.39703	0.5934	1.59465	0.27951	2.02026	0.634	2.22267	0.46443	1.00562	0.31385	0.44333	0.30337	0.51289	1.30316	1.01178
LB-36	0.30375	0.65839	0.29071	2.03293	0.60356	0.77191	1.00244	0.51171	0.39733	0.39773	0.50878	0.41373	2.79997	2.84519	0.30515	0.31143	0.28094	0.71098	0.31842	0.80258	0.87746	0.97876	0.42873	1.44157	0.56802	2.98851	1.27216	2.86385	1.41821	0	0.2829	0.66354	2.87975	0.7671	0.23714	0.87771	0.27817	1.63241	2.7526	0.93101	2.89417	1.85263	2.24685	1.36008	1.20894	1.40613	0.97388	2.34493	2.2473
LB-37	0.34516	0.66083	0.33878	1.99856	0.51983	0.73874	0.96103	0.51343	0.30058	0.39343	0.38242	0.31959	2.71939	2.76387	0.37918	0.32649	0.30878	0.74445	0.21044	0.67007	0.82411	1.00078	0.48306	1.40871	0.47349	2.89262	1.2159	2.77145	1.39457	0.2829	0	0.60483	2.79592	0.75566	0.21571	0.85571	0.44684	1.61605	2.67695	0.87963	2.8113	1.82733	2.19988	1.36094	1.17921	1.37205	0.95701	2.27633	2.21407
LB-38	0.85566	0.42691	0.79314	1.61082	0.29988	0.31978	0.4873	0.43605	0.48169	0.68011	0.33626	0.46882	2.29862	2.36195	0.83324	0.52481	0.78476	0.49624	0.4856	0.58133	0.37838	0.93019	0.47579	0.92043	0.30246	2.5016	0.94202	2.35439	0.91998	0.66354	0.60483	0	2.38494	0.4263	0.63066	0.47135	0.84445	1.14204	2.26726	0.35732	2.4139	1.33332	1.6905	0.90155	0.683	0.83983	0.51619	1.77614	1.74066
LB-39	3.03899	2.55267	2.99819	2.30588	2.46786	2.38547	2.23726	2.62984	2.66794	2.85594	2.52584	2.62063	0.25724	0.2245	3.03556	2.75335	2.99166	2.56237	2.69359	2.33538	2.32828	2.7086	2.71118	2.13123	2.48426	0.36393	2.41659	0.26259	2.19385	2.87975	2.79592	2.38494	0	2.47038	2.86226	2.39487	3.03253	2.18176	0.56238	2.23218	0.28356	2.10869	1.49035	2.26033	2.13506	2.06212	2.32786	1.02875	2.21629
LB-40	0.93141	0.29752	0.86323	1.56945	0.63815	0.22905	0.38834	0.34923	0.68091	0.79036	0.5824	0.73663	2.36717	2.42826	0.95325	0.56714	0.86217	0.38451	0.67176	0.90728	0.26556	0.985	0.48333	0.73788	0.55322	2.62274	0.98687	2.45318	0.69414	0.7671	0.75566	0.4263	2.47038	0	0.73339	0.26592	0.95436	0.91909	2.31686	0.39222	2.49149	1.13879	1.5856	0.70147	0.59607	0.73779	0.33295	1.76419	1.59525
LB-41	0.28591	0.65861	0.32645	2.0239	0.56705	0.74775	0.98227	0.50007	0.33576	0.43481	0.45632	0.39085	2.78334	2.8309	0.35728	0.32326	0.26311	0.74068	0.25973	0.78068	0.83792	1.02966	0.46797	1.41922	0.51578	2.96894	1.25751	2.8427	1.39703	0.23714	0.21571	0.63066	2.86226	0.73339	0	0.86138	0.4165	1.61955	2.73706	0.90159	2.87775	1.83505	2.22881	1.36728	1.19883	1.38842	0.95611	2.32423	2.22865
LB-42	1.05287	0.32508	0.95456	1.46423	0.67011	0.25257	0.26516	0.44842	0.76598	0.85542	0.63694	0.81853	2.29139	2.35633	1.0451	0.65711	0.96803	0.38262	0.7771	0.91838	0.27239	0.99021	0.5627	0.62206	0.61101	2.54561	0.94037	2.37788	0.5934	0.87771	0.85571	0.47135	2.39487	0.26592	0.86138	0	1.05775	0.79992	2.23838	0.34143	2.41806	1.02643	1.47668	0.58249	0.48703	0.61928	0.26067	1.66243	1.47983
LB-43	0.37069	0.82185	0.32745	2.18305	0.75085	0.94513	1.17885	0.70172	0.56008	0.42541	0.69011	0.56152	2.95669	3.00075	0.26953	0.51181	0.34692	0.84183	0.49566	0.9141	1.05285	1.07171	0.55334	1.61382	0.72193	3.13959	1.4176	3.01937	1.59465	0.27817	0.44684	0.84445	3.03253	0.95436	0.4165	1.05775	0	1.8036	2.90604	1.10281	3.04762	2.0211	2.42358	1.5058	1.36797	1.57784	1.13974	2.52072	2.42479
LB-44	1.80293	1.04137	1.71202	1.29814	1.36774	0.9309	0.72544	1.19146	1.51957	1.5947	1.37145	1.55133	2.0517	2.1304	1.80699	1.4157	1.72911	1.03501	1.53014	1.54919	0.85541	1.47966	1.2997	0.32564	1.32176	2.37667	1.2428	2.16546	0.27951	1.63241	1.61605	1.14204	2.18176	0.91909	1.61955	0.79992	1.8036	0	2.00555	0.85404	2.21003	0.28748	0.88233	0.41197	0.62216	0.42249	0.73225	1.24494	0.87746
LB-45	2.91169	2.40261	2.86504	2.13365	2.36259	2.24229	2.08802	2.48396	2.55145	2.72674	2.41333	2.51929	0.66518	0.58342	2.91104	2.61876	2.85842	2.40339	2.57799	2.25155	2.18111	2.59652	2.56661	1.96198	2.36921	0.6927	2.32033	0.6412	2.02026	2.7526	2.67695	2.26726	0.56238	2.31686	2.73706	2.23838	2.90604	2.00555	0	2.09359	0.72317	1.93305	1.36	2.07987	1.98299	1.91303	2.16931	0.96645	2.03312
LB-46	1.11751	0.46398	1.02065	1.44655	0.5503	0.26303	0.2455	0.56825	0.75575	0.87277	0.6055	0.77415	2.13593	2.20698	1.09011	0.75054	1.02214	0.46775	0.77267	0.78085	0.21831	1.05153	0.62934	0.61487	0.51572	2.37224	0.93338	2.20446	0.634	0.93101	0.87963	0.35732	2.23218	0.39222	0.90159	0.34143	1.10281	0.85404	2.09359	0	2.26515	1.02727	1.40642	0.60644	0.41005	0.54462	0.28654	1.53674	1.4834
LB-48	3.04979	2.57177	3.0095	2.36473	2.49663	2.41071	2.26446	2.64585	2.68841	2.87181	2.54916	2.64321	0.25714	0.27615	3.0489	2.76898	3.00459	2.5825	2.71329	2.37175	2.35679	2.71307	2.73071	2.16292	2.51205	0.50225	2.43112	0.39402	2.22267	2.89417	2.8113	2.4139	0.28356	2.49149	2.87775	2.41806	3.04762	2.21003	0.72317	2.26515	0	2.14227	1.51672	2.29147	2.16818	2.09708	2.3528	1.07691	2.26489
LB-49	2.0237	1.26644	1.93113	1.29406	1.55284	1.13828	0.92064	1.42043	1.7259	1.79985	1.57321	1.75145	1.97508	2.05889	2.02364	1.64394	1.9458	1.24003	1.73833	1.71333	1.04873	1.67197	1.51359	0.45835	1.50647	2.30969	1.38277	2.08647	0.46443	1.85263	1.82733	1.33332	2.10869	1.13879	1.83505	1.02643	2.0211	0.28748	1.93305	1.02727	2.14227	0	0.71949	0.56851	0.77308	0.5417	0.93074	1.1288	0.74757
LB-50	2.42169	1.71185	2.34786	1.47206	1.88359	1.5548	1.33095	1.84833	2.08323	2.20687	1.9184	2.08299	1.34692	1.43721	2.42913	2.05233	2.35489	1.6996	2.09985	1.9421	1.46671	2.01318	1.95055	0.96384	1.85679	1.71871	1.68294	1.48246	1.00562	2.24685	2.19988	1.6905	1.49035	1.5856	2.22881	1.47668	2.42358	0.88233	1.36	1.40642	1.51672	0.71949	0	1.11031	1.16975	0.96581	1.38396	0.50479	0.94975
LB-51	1.54985	0.78104	1.43132	1.31679	1.11079	0.68226	0.51259	0.94571	1.26943	1.28713	1.1337	1.29894	2.1417	2.21615	1.52083	1.16458	1.45745	0.72529	1.27638	1.31173	0.61909	1.28419	1.0002	0.31835	1.05642	2.44445	1.12399	2.24508	0.31385	1.36008	1.36094	0.90155	2.26033	0.70147	1.36728	0.58249	1.5058	0.41197	2.07987	0.60644	2.29147	0.56851	1.11031	0	0.42364	0.3655	0.48723	1.40235	1.11507
LB-52	1.40242	0.67308	1.29806	1.325	0.87776	0.52393	0.36313	0.82233	1.06543	1.14847	0.91668	1.07871	2.02593	2.10218	1.37123	1.0246	1.30875	0.64921	1.08196	1.05257	0.46538	1.1091	0.8804	0.41119	0.8364	2.29654	0.91105	2.11089	0.44333	1.20894	1.17921	0.683	2.13506	0.59607	1.19883	0.48703	1.36797	0.62216	1.98299	0.41005	2.16818	0.77308	1.16975	0.42364	0	0.35436	0.38071	1.34944	1.27425
LB-53	1.59178	0.85225	1.50333	1.25965	1.06016	0.69772	0.49079	1.00178	1.26138	1.36206	1.10144	1.27343	1.94466	2.0288	1.58203	1.20681	1.51268	0.8431	1.27279	1.22872	0.61164	1.25655	1.08535	0.27031	1.03097	2.23405	1.00324	2.03488	0.30337	1.40613	1.37205	0.83983	2.06212	0.73779	1.38842	0.61928	1.57784	0.42249	1.91303	0.54462	2.09708	0.5417	0.96581	0.3655	0.35436	0	0.52826	1.19778	1.0429
LB-54	1.15342	0.42387	1.04974	1.45642	0.70743	0.27166	0.21168	0.55927	0.83708	0.9293	0.71788	0.88558	2.22111	2.28916	1.12853	0.78476	1.05838	0.39812	0.86057	0.96023	0.25414	1.03415	0.63702	0.52366	0.64716	2.48574	0.95202	2.30772	0.51289	0.97388	0.95701	0.51619	2.32786	0.33295	0.95611	0.26067	1.13974	0.73225	2.16931	0.28654	2.3528	0.93074	1.38396	0.48723	0.38071	0.52826	0	1.57652	1.42738
LB-55	2.5221	1.87646	2.45939	1.60241	1.93173	1.70231	1.49674	1.99302	2.14853	2.31127	1.98081	2.12518	0.89543	0.99378	2.52396	2.17114	2.45915	1.87531	2.16972	1.91244	1.62085	2.11124	2.09087	1.24397	1.92513	1.24183	1.76424	1.00652	1.30316	2.34493	2.27633	1.77614	1.02875	1.76419	2.32423	1.66243	2.52072	1.24494	0.96645	1.53674	1.07691	1.1288	0.50479	1.40235	1.34944	1.19778	1.57652	0	1.28714
LB-56	2.40221	1.70936	2.33124	1.23643	1.95258	1.60475	1.39343	1.84785	2.12969	2.2211	1.96317	2.14576	2.10717	2.16913	2.42071	2.04165	2.3455	1.7024	2.13773	2.07393	1.51837	2.03197	1.94877	1.01482	1.93117	2.39704	1.70456	2.19275	1.01178	2.2473	2.21407	1.74066	2.21629	1.59525	2.22865	1.47983	2.42479	0.87746	2.03312	1.4834	2.26489	0.74757	0.94975	1.11507	1.27425	1.0429	1.42738	1.28714	0
LB-57	0.8975	0.27103	0.79099	1.59219	0.49855	0.14529	0.35632	0.33927	0.5879	0.66755	0.48741	0.63551	2.34566	2.40861	0.87075	0.53381	0.79382	0.28151	0.59352	0.77825	0.22097	0.95948	0.39176	0.77238	0.40985	2.58447	0.96417	2.42183	0.76326	0.71324	0.68787	0.33792	2.44349	0.23601	0.69132	0.29498	0.87768	0.98923	2.29379	0.3084	2.46658	1.19391	1.61842	0.71811	0.56852	0.75636	0.31065	1.7687	1.66236
LB-58	1.19923	0.55095	1.11526	1.44075	0.61059	0.32627	0.28859	0.64675	0.79692	0.97812	0.65874	0.8136	2.07976	2.15313	1.1689	0.83619	1.10998	0.55231	0.82634	0.81978	0.28847	1.07037	0.71831	0.60512	0.57266	2.31742	0.91663	2.14598	0.62455	1.00411	0.95851	0.42628	2.17864	0.45216	0.97335	0.41697	1.17349	0.84493	2.04823	0.23365	2.21283	1.00918	1.36506	0.63205	0.40125	0.53969	0.32659	1.48247	1.47758
LB-59	2.81	2.27991	2.76263	2.02215	2.2101	2.10539	1.93824	2.36668	2.42129	2.6173	2.26749	2.37698	0.38176	0.45312	2.80531	2.50077	2.75644	2.28887	2.44773	2.10031	2.04024	2.45045	2.45504	1.81025	2.22776	0.57375	2.12999	0.3672	1.87679	2.64274	2.55373	2.11363	0.43753	2.19247	2.62211	2.10598	2.80783	1.86333	0.60331	1.94539	0.52142	1.7846	1.18842	1.95817	1.83542	1.7422	2.03644	0.70892	1.88649
LB-60	1.11574	0.70458	1.06543	1.61834	0.83669	0.64436	0.67577	0.67798	0.85378	1.02509	0.74519	0.88483	2.31489	2.36649	1.15198	0.80535	1.06197	0.791	0.84161	0.9798	0.6205	1.22478	0.83951	0.93784	0.77381	2.53644	1.10172	2.37902	0.90681	0.99545	0.90296	0.70659	2.41343	0.60839	0.94223	0.64584	1.19134	1.10425	2.27507	0.70855	2.43029	1.28935	1.63955	0.98514	0.86456	0.95193	0.73388	1.76175	1.637
LB-61	0.54179	0.56266	0.48426	1.90947	0.34381	0.58442	0.81254	0.44948	0.1896	0.44635	0.26557	0.26187	2.59744	2.65078	0.48763	0.37719	0.45158	0.63646	0.22204	0.58506	0.67796	1.0074	0.42921	1.27299	0.31319	2.7772	1.14515	2.64948	1.26586	0.41187	0.31073	0.45295	2.67547	0.64457	0.33577	0.73697	0.55788	1.49081	2.55873	0.72029	2.69676	1.69471	2.06626	1.23239	1.03405	1.23051	0.80184	2.14052	2.10728
LB-62	0.56491	0.47612	0.48804	1.84946	0.5583	0.60379	0.80155	0.38477	0.45964	0.48918	0.45069	0.46054	2.62437	2.6713	0.54674	0.25849	0.5246	0.56778	0.4029	0.76	0.71119	0.88745	0.36838	1.23219	0.53166	2.82465	1.13064	2.69437	1.20661	0.35823	0.42097	0.54026	2.70998	0.61679	0.45253	0.67076	0.52091	1.4021	2.57648	0.76204	2.7266	1.63142	2.02436	1.14299	1.0091	1.19171	0.79532	2.13492	2.02361
LB-63	1.63894	0.88107	1.55187	1.29632	1.18424	0.75004	0.55666	1.03382	1.3435	1.42561	1.19465	1.37207	2.03661	2.11594	1.64241	1.25709	1.56329	0.87715	1.35085	1.3683	0.66091	1.33537	1.13147	0.20497	1.13111	2.34846	1.10082	2.14029	0.15289	1.46612	1.44175	0.95398	2.1611	0.74462	1.44526	0.6455	1.63709	0.258	1.99178	0.65766	2.19168	0.41773	0.95685	0.29694	0.44864	0.26058	0.55456	1.26231	0.99575
LB-64	0.98361	0.32872	0.90211	1.51081	0.52806	0.1591	0.28809	0.41319	0.65543	0.79229	0.52166	0.68523	2.26715	2.33323	0.97564	0.60925	0.9028	0.37982	0.65813	0.79243	0.17856	0.94304	0.50426	0.6934	0.46928	2.50717	0.89825	2.34116	0.67696	0.79495	0.76219	0.29763	2.36621	0.22573	0.76713	0.25814	0.97846	0.90786	2.22514	0.2306	2.39187	1.10982	1.52458	0.669	0.49688	0.64757	0.27887	1.6708	1.56039
LB-65	0.47206	0.44628	0.40016	1.87753	0.50342	0.53558	0.77483	0.2879	0.35152	0.40359	0.39563	0.43452	2.66099	2.71255	0.48951	0.21742	0.38474	0.52482	0.30446	0.77328	0.63063	0.97321	0.28359	1.20471	0.42101	2.87059	1.15183	2.73118	1.18057	0.33175	0.32344	0.49803	2.74751	0.5165	0.28035	0.64106	0.52024	1.40049	2.60788	0.70957	2.76401	1.62096	2.0361	1.14163	0.99593	1.18554	0.74186	2.15874	2.03895
LB-66	0.51549	0.47437	0.46249	1.87549	0.50146	0.54589	0.78057	0.31688	0.35033	0.49247	0.39358	0.43376	2.64367	2.69483	0.53186	0.26542	0.44014	0.57319	0.32612	0.77438	0.64646	0.98202	0.36263	1.21349	0.44399	2.84877	1.14702	2.71176	1.18733	0.37787	0.37361	0.50042	2.72904	0.53187	0.31352	0.65254	0.5751	1.40274	2.59299	0.71975	2.74627	1.62624	2.03153	1.16061	1.00581	1.18911	0.75249	2.14735	2.03711
LB-67	1.2343	0.49262	1.13619	1.38819	0.80866	0.38077	0.22232	0.63173	0.93817	1.02631	0.80265	0.98153	2.19459	2.26487	1.22918	0.84377	1.14657	0.49045	0.94933	1.04288	0.33276	1.08617	0.73175	0.43248	0.75159	2.46438	0.9682	2.28495	0.40583	1.05572	1.03546	0.59635	2.30546	0.39195	1.0403	0.26482	1.23676	0.62263	2.14259	0.36102	2.32975	0.83387	1.30268	0.42697	0.38555	0.45209	0.23852	1.51735	1.30929
LB-68	0.9587	0.5975	0.87263	1.53575	0.42852	0.54038	0.62245	0.63101	0.60827	0.73837	0.46025	0.55067	2.25235	2.30858	0.90352	0.6615	0.88061	0.62627	0.60934	0.42617	0.58639	0.91356	0.62194	1.02585	0.45822	2.42942	0.87546	2.29741	1.04364	0.76161	0.69908	0.41093	2.3299	0.66677	0.77894	0.63438	0.90257	1.24409	2.21974	0.53904	2.36399	1.42171	1.72315	0.99925	0.77027	0.93862	0.67872	1.76672	1.79107
PP-1	0.27429	0.96733	0.34515	2.28688	0.86342	1.08736	1.31622	0.81959	0.6295	0.54143	0.77085	0.6605	3.06356	3.10361	0.32798	0.60254	0.32813	1.02898	0.57341	0.9975	1.17899	1.2503	0.74174	1.74842	0.83156	3.23255	1.53446	3.1209	1.72816	0.4366	0.45867	0.97681	3.13586	1.07812	0.42451	1.18649	0.41435	1.93815	3.01332	1.23643	3.14828	2.15567	2.55354	1.67161	1.52617	1.72253	1.2872	2.6451	2.53087
PS-1'	3.62151	3.19552	3.56682	2.75939	3.34778	3.15957	3.07434	3.28465	3.46173	3.49028	3.35037	3.46268	3.65931	3.73867	3.6244	3.38379	3.57505	3.20687	3.46059	3.37558	3.13257	3.43108	3.32792	2.94138	3.3359	3.8738	3.10903	3.73186	2.93185	3.5161	3.50751	3.2387	3.75169	3.15662	3.5153	3.09118	3.61502	2.87888	3.67493	3.11275	3.80227	2.86925	3.02693	2.96055	3.01853	2.94332	3.08641	3.1619	2.93254
PS-1	3.31668	2.83891	3.25836	2.37372	3.03226	2.80174	2.69841	2.93803	3.1469	3.17892	3.02789	3.15746	3.34359	3.41142	3.32596	3.05645	3.27033	2.84911	3.14806	3.0678	2.76832	3.09529	2.99347	2.53713	3.01486	3.57597	2.75379	3.42176	2.52267	3.2059	3.19672	2.90339	3.43689	2.7915	3.20731	2.71484	3.31693	2.45045	3.33137	2.75283	3.48732	2.43951	2.61566	2.55483	2.63984	2.54747	2.70832	2.78779	2.48849
PVC-1	2.65761	2.01247	2.58707	1.78156	2.25902	1.94175	1.75048	2.14592	2.41011	2.49191	2.25768	2.42918	2.29641	2.365	2.6707	2.31308	2.60403	2.02621	2.42268	2.3644	1.87876	2.2469	2.24228	1.46849	2.24378	2.5879	1.96969	2.40386	1.46002	2.51245	2.48524	2.0751	2.41466	1.93966	2.50659	1.80631	2.67885	1.32289	2.27657	1.85024	2.43871	1.25943	1.34066	1.52652	1.64343	1.47815	1.78355	1.60606	1.29484
PE-1	3.04318	2.60791	3.01147	2.35599	2.45661	2.43546	2.30059	2.67375	2.65709	2.87174	2.51332	2.59492	0.86267	0.81433	3.03617	2.77541	3.00175	2.62992	2.6827	2.28149	2.3772	2.768	2.75653	2.23833	2.48902	0.59591	2.45001	0.63449	2.30578	2.89137	2.78588	2.39872	0.75463	2.53608	2.86765	2.4657	3.04563	2.31968	0.89719	2.28273	0.90608	2.25625	1.74001	2.38123	2.22874	2.1632	2.40832	1.29015	2.29996
PET-1	2.66633	2.05819	2.60543	1.80062	2.22151	1.96003	1.77541	2.17677	2.39087	2.49826	2.24259	2.40777	2.21025	2.25455	2.68313	2.33883	2.6186	2.06252	2.40724	2.3146	1.89134	2.26409	2.27438	1.52094	2.22288	2.44898	2.00291	2.27502	1.53144	2.52695	2.479	2.05006	2.30068	1.97193	2.50925	1.86446	2.69293	1.4354	2.14779	1.83753	2.32527	1.34889	1.36697	1.59769	1.68511	1.48486	1.81463	1.56051	1.13369
PE-1'	3.12076	2.68545	3.08926	2.43509	2.53843	2.51388	2.37621	2.75271	2.73761	2.94887	2.59625	2.67483	0.64662	0.61302	3.11491	2.85506	3.07926	2.70457	2.76333	2.36403	2.45622	2.82883	2.83363	2.30877	2.56659	0.33831	2.50826	0.41048	2.37628	2.96967	2.86547	2.48072	0.53522	2.61303	2.94587	2.5419	3.12322	2.38405	0.84637	2.36063	0.6493	2.31559	1.74919	2.45103	2.294	2.23313	2.48069	1.27431	2.39231
PVC-1'	2.58046	1.91334	2.50911	1.67925	2.17182	1.83699	1.63496	2.05184	2.32678	2.41111	2.17082	2.346	2.21773	2.28853	2.59508	2.22725	2.52655	1.92478	2.33882	2.28485	1.76935	2.16496	2.1534	1.3266	2.15353	2.51969	1.87955	2.3279	1.31635	2.43256	2.40474	1.97843	2.34043	1.83338	2.42459	1.69785	2.60308	1.16397	2.19396	1.74163	2.36587	1.08895	1.18876	1.39201	1.52279	1.34067	1.66801	1.48662	1.12703
PU	2.36861	1.6425	2.27891	1.29357	1.8939	1.53466	1.30789	1.78406	2.06721	2.15986	1.90737	2.08966	2.02614	2.11337	2.36776	1.98974	2.29645	1.62448	2.08519	2.03202	1.45264	1.96018	1.87789	0.9188	1.86239	2.34266	1.64858	2.13158	0.93219	2.19685	2.16837	1.68812	2.15648	1.53905	2.18115	1.40835	2.37381	0.79439	1.99787	1.41905	2.18555	0.65805	0.85135	1.03302	1.1655	0.96894	1.34726	1.20645	0.7501
ABS	3.22562	2.74872	3.16195	1.98708	2.9263	2.71001	2.59836	2.84633	3.05078	3.07917	2.93076	3.05699	3.29084	3.36433	3.22865	2.96293	3.17543	2.75013	3.05148	2.92812	2.67416	3.00888	2.89261	2.44027	2.91336	3.51591	2.59791	3.36553	2.43015	3.10983	3.10172	2.80079	3.3841	2.70046	3.10687	2.61678	3.22014	2.37476	3.26834	2.65531	3.43832	2.35254	2.54416	2.4627	2.54685	2.4511	2.6147	2.71298	2.3441
PA66	2.531	1.87099	2.45722	1.66508	2.09289	1.77197	1.55851	2.00056	2.24532	2.35283	2.10014	2.2715	2.16831	2.23191	2.53851	2.18455	2.4593	1.84562	2.26861	2.21643	1.70438	2.14671	2.09802	1.24819	2.06835	2.4396	1.87773	2.24737	1.2624	2.37977	2.34478	1.90956	2.27562	1.78123	2.36349	1.65292	2.55489	1.15117	2.11021	1.6724	2.30916	1.0738	1.16883	1.3694	1.47396	1.30315	1.60052	1.43733	1.13324
PC	2.83535	2.24857	2.78746	2.04637	2.46975	2.17151	2.00476	2.3659	2.61256	2.69247	2.47615	2.62191	2.48347	2.54951	2.86416	2.52085	2.79605	2.25419	2.61154	2.58522	2.10601	2.5001	2.45964	1.7375	2.44558	2.75798	2.27195	2.57871	1.72981	2.70467	2.68224	2.28804	2.59618	2.15517	2.69073	2.06816	2.85892	1.61615	2.45135	2.08177	2.62118	1.53676	1.61349	1.79014	1.91409	1.74513	2.02644	1.85316	1.52227
PTFE	2.6477	2.03257	2.59059	1.856	2.26976	1.9608	1.78035	2.16425	2.40778	2.50045	2.26397	2.42122	2.3291	2.39075	2.66691	2.32175	2.60442	2.04554	2.4166	2.37778	1.89888	2.28121	2.26405	1.50683	2.25005	2.60745	2.02508	2.42246	1.49912	2.51458	2.48448	2.08752	2.44803	1.95549	2.50148	1.85022	2.67647	1.3797	2.30703	1.87773	2.46793	1.30665	1.39616	1.57552	1.71147	1.52296	1.80841	1.6567	1.27581
PVC-Com-2	2.61829	2.04525	2.56699	1.70016	2.23746	1.97507	1.82172	2.15877	2.38349	2.48239	2.22628	2.39059	2.46514	2.51753	2.64201	2.30829	2.58091	2.07439	2.38674	2.32361	1.90339	2.29607	2.25633	1.58525	2.22949	2.70208	2.01039	2.5257	1.57589	2.48957	2.44644	2.06336	2.56096	1.96584	2.46855	1.87185	2.6571	1.51282	2.41371	1.8867	2.60553	1.46418	1.60342	1.66179	1.76354	1.58903	1.85985	1.81244	1.23316
PVC-Com-3	2.61338	2.03722	2.56174	1.69802	2.2312	1.96622	1.81154	2.15078	2.37797	2.47699	2.22097	2.38557	2.45577	2.50848	2.63706	2.30228	2.57511	2.06522	2.3813	2.3193	1.89396	2.28679	2.24902	1.57244	2.22286	2.69549	2.00048	2.51813	1.56205	2.48387	2.4416	2.05549	2.55245	1.95649	2.4631	1.86228	2.65175	1.49677	2.40393	1.87651	2.59712	1.44668	1.58674	1.6472	1.75176	1.57489	1.8483	1.79918	1.22098
PVC-Com-4	2.76801	2.1914	2.71513	1.89064	2.40791	2.12931	1.97686	2.30876	2.54804	2.63026	2.39818	2.55778	2.5265	2.5717	2.78998	2.4605	2.7345	2.21913	2.55153	2.49095	2.06169	2.40816	2.40368	1.73403	2.39755	2.76964	2.15698	2.60214	1.71385	2.64071	2.60772	2.22579	2.61776	2.11881	2.62703	2.01852	2.79681	1.61939	2.4523	2.04506	2.66892	1.55973	1.66947	1.77284	1.8799	1.73084	2.0039	1.88873	1.4763
PVC-Com-5	2.65771	2.01988	2.59025	1.74681	2.26099	1.94983	1.7657	2.1518	2.41301	2.49706	2.25538	2.42528	2.28547	2.35084	2.67224	2.32415	2.6062	2.0356	2.42241	2.35013	1.8851	2.02576	2.25198	1.48406	2.24459	2.5809	1.76653	2.39255	1.46946	2.51398	2.47331	2.07031	2.4091	1.94502	2.50417	1.82081	2.67996	1.35388	2.27959	1.85644	2.42179	1.28477	1.35458	1.55341	1.61329	1.45917	1.78269	1.58792	1.29713
PVC-Com-6	2.71793	2.17291	2.67235	1.85811	2.35939	2.1068	1.96457	2.28207	2.50054	2.59294	2.34798	2.50236	2.59979	2.66255	2.74275	2.42445	2.68293	2.20388	2.50043	2.45548	2.04216	2.43466	2.37326	1.74013	2.35148	2.84466	2.15531	2.66495	1.73246	2.59732	2.55702	2.19254	2.70538	2.09427	2.57508	2.01199	2.75802	1.67291	2.59373	2.03032	2.7383	1.63161	1.77013	1.82643	1.91299	1.75357	2.00191	1.9743	1.43466
PVC-Com-7	2.56693	1.91181	2.4969	1.57629	2.15743	1.83403	1.63605	2.04796	2.31363	2.39765	2.14856	2.32838	2.22777	2.29561	2.58123	2.22185	2.51242	1.92037	2.32359	2.2537	1.76525	2.16058	2.14047	1.3315	2.13657	2.518	1.86583	2.32733	1.3269	2.41887	2.38643	1.96714	2.34659	1.82948	2.40908	1.70094	2.58879	1.20198	2.20385	1.73743	2.37323	1.12198	1.22554	1.40808	1.52476	1.35315	1.66983	1.50078	1.12747
PVC-Com-8	2.65744	2.09795	2.60946	1.6791	2.28613	2.02813	1.8733	2.20674	2.43102	2.52581	2.26628	2.43345	2.45464	2.51168	2.68312	2.35607	2.62006	2.12834	2.43221	2.36429	1.96254	2.37597	2.30172	1.64003	2.27613	2.695	2.07531	2.52127	1.63849	2.53261	2.48924	2.11188	2.55548	2.01942	2.509	1.92654	2.70004	1.57834	2.42484	1.94238	2.58569	1.52591	1.62843	1.7362	1.81162	1.66214	1.91844	1.8253	1.3165
PE-Com-1	3.28921	2.86082	3.25682	2.58668	2.71864	2.69415	2.55778	2.92851	2.91156	3.11832	2.77592	2.85187	0.80978	0.7223	3.28098	3.02804	3.24739	2.877	2.94002	2.54187	2.63992	2.99112	3.00479	2.49021	2.74794	0.35744	2.69954	0.56775	2.55799	3.13908	3.04011	2.66524	0.63348	2.79456	3.11979	2.71966	3.28629	2.55882	0.78571	2.54505	0.78284	2.49014	1.91496	2.62221	2.47348	2.41842	2.65921	1.4505	2.56013
PE-Com-2	3.29945	2.87527	3.26822	2.59871	2.7367	2.71079	2.57651	2.9412	2.92732	3.13269	2.7933	2.86892	0.80479	0.69276	3.29276	3.04012	3.25918	2.89093	2.95558	2.55908	2.65774	3.00396	3.01829	2.50974	2.76552	0.36287	2.71655	0.5836	2.57441	3.15039	3.05434	2.68218	0.60482	2.80763	3.13225	2.73436	3.29713	2.57456	0.76455	2.56262	0.76383	2.50783	1.92921	2.63725	2.49189	2.43656	2.67517	1.46678	2.57157
PE-Com-3	3.33875	2.92744	3.30916	2.65547	2.78902	2.76766	2.63772	2.9904	2.97372	3.17689	2.84428	2.91688	0.93217	0.80606	3.33273	3.0859	3.29969	2.94411	3.00205	2.60625	2.71687	3.04139	3.06586	2.57839	2.81762	0.5045	2.7718	0.7291	2.64139	3.19237	3.09758	2.73746	0.72406	2.86285	3.17564	2.79119	3.336	2.64359	0.78338	2.62271	0.89026	2.58184	2.01472	2.70078	2.55273	2.50533	2.73411	1.56055	2.64172
PE-Com-4	3.28094	2.85924	3.25113	2.58374	2.72697	2.69637	2.56241	2.92162	2.91174	3.11843	2.77995	2.85652	0.81288	0.69312	3.27712	3.02176	3.24096	2.87502	2.93993	2.55189	2.64352	2.98933	2.99982	2.4964	2.75217	0.40951	2.70922	0.61468	2.55943	3.13231	3.03607	2.67061	0.61618	2.78888	3.11462	2.71747	3.2798	2.56179	0.74152	2.55091	0.77155	2.49678	1.92207	2.62398	2.47909	2.42633	2.6603	1.46273	2.56562
PE-Com-5	3.00564	2.54196	2.96658	2.29073	2.3932	2.35878	2.2115	2.61519	2.60147	2.81932	2.45492	2.53775	0.80851	0.82752	2.99385	2.72438	2.95691	2.55695	2.62893	2.23696	2.29317	2.70639	2.69608	2.13111	2.42186	0.59616	2.35966	0.5543	2.20493	2.84757	2.73699	2.33123	0.76994	2.46657	2.8205	2.38973	3.00651	2.21279	0.92547	2.20276	0.88428	2.13603	1.61758	2.28553	2.1314	2.06029	2.32238	1.16617	2.21984
PE-Com-6	3.25754	2.8496	3.22849	2.60753	2.70814	2.68484	2.55723	2.90978	2.88818	3.09492	2.76337	2.83373	0.93382	0.82259	3.25194	3.00783	3.21856	2.86366	2.91699	2.53223	2.63222	2.98809	2.98565	2.5014	2.73508	0.54214	2.71274	0.71061	2.56632	3.11235	3.01437	2.65647	0.76398	2.78062	3.09341	2.71601	3.25778	2.5756	0.79386	2.54329	0.88819	2.51322	1.9595	2.628	2.48224	2.43569	2.6539	1.51732	2.5776
PE-Com-7	3.30514	2.88523	3.27376	2.6105	2.74391	2.72076	2.58793	2.9503	2.93215	3.13774	2.8006	2.87434	0.90003	0.79441	3.29724	3.04752	3.26416	2.90107	2.96067	2.56544	2.66708	3.01684	3.02565	2.52443	2.7726	0.46365	2.73156	0.66825	2.58987	3.15697	3.05906	2.69124	0.71223	2.8189	3.13788	2.74652	3.30269	2.59237	0.77836	2.57417	0.87236	2.5264	1.96297	2.65174	2.50433	2.4534	2.68717	1.50882	2.59444
PE-Com-8	3.24856	2.81562	3.21572	2.54966	2.68919	2.65126	2.51335	2.88172	2.87801	3.08022	2.74184	2.8202	0.68422	0.571	3.24375	2.9842	3.20787	2.82993	2.90407	2.51884	2.59654	2.94335	2.96182	2.43996	2.71413	0.29517	2.65373	0.47868	2.50354	3.09761	3.00237	2.62859	0.50899	2.74544	3.08072	2.67159	3.24717	2.50157	0.73407	2.505	0.64139	2.43366	1.84482	2.56854	2.42846	2.37009	2.61245	1.3819	2.50484
PET-Com-1	2.636	2.0196	2.57007	1.76756	2.199	1.93006	1.74428	2.14412	2.36591	2.45877	2.22108	2.3863	2.25659	2.30378	2.64676	2.30607	2.58368	2.01694	2.38406	2.30851	1.86418	2.228	2.23388	1.49008	2.19957	2.50328	1.99204	2.32697	1.49947	2.49403	2.45435	2.02936	2.34988	1.94069	2.48152	1.83087	2.65584	1.40962	2.18226	1.81374	2.37251	1.32685	1.38382	1.55317	1.65535	1.46651	1.77677	1.59681	1.09584
PET-Com-2	2.64526	2.02996	2.57982	1.78294	2.20978	1.93977	1.75342	2.15519	2.37547	2.46818	2.23152	2.39552	2.24408	2.29014	2.65649	2.31719	2.59309	2.02706	2.39394	2.31582	1.87431	2.23845	2.24429	1.50053	2.20922	2.4895	2.00194	2.31419	1.51107	2.50429	2.46339	2.04061	2.33715	1.95147	2.49153	1.84179	2.6655	1.42127	2.1669	1.8236	2.35682	1.33627	1.38028	1.56331	1.66519	1.47912	1.78567	1.59103	1.11194
PET-Com-3	2.76129	2.17749	2.69974	1.89683	2.34526	2.0951	1.91859	2.29374	2.50161	2.59711	2.36225	2.52319	2.33961	2.37769	2.77621	2.4468	2.71375	2.17851	2.51948	2.43352	2.03182	2.33384	2.38375	1.68302	2.34472	2.57338	2.08977	2.40868	1.69232	2.6274	2.58525	2.18512	2.42539	2.10383	2.61372	1.99703	2.78691	1.6072	2.27219	1.98345	2.44418	1.53157	1.54974	1.74565	1.82714	1.65272	1.95121	1.73158	1.30321
PET-Com-4	2.72292	2.12808	2.6604	1.83981	2.30206	2.04372	1.86329	2.2466	2.46208	2.55644	2.31864	2.48258	2.29799	2.33991	2.73815	2.40313	2.67492	2.1302	2.47916	2.39494	1.97964	2.30398	2.33795	1.61922	2.30142	2.54129	2.05543	2.37246	1.62789	2.58674	2.54609	2.13673	2.38842	2.05168	2.57328	1.9435	2.74804	1.53794	2.2355	1.93003	2.40659	1.45865	1.48049	1.6826	1.77294	1.59097	1.89674	1.67433	1.23295
PET-Com-5	2.69886	2.09736	2.63577	1.82097	2.27276	2.00912	1.82435	2.21807	2.43426	2.52947	2.29026	2.45408	2.25493	2.29611	2.71416	2.3771	2.64935	2.09735	2.45185	2.363	1.94362	2.27458	2.31035	1.57539	2.27114	2.49647	2.02488	2.32683	1.58613	2.56204	2.51866	2.10631	2.34555	2.01958	2.54801	1.9091	2.72467	1.49309	2.18475	1.89345	2.36296	1.40932	1.42443	1.64121	1.73351	1.55004	1.85766	1.62109	1.1876
PET-Com-6	2.72821	2.13586	2.66626	1.85714	2.30776	2.05179	1.87223	2.25442	2.4669	2.56186	2.32523	2.48788	2.30777	2.34829	2.74312	2.41024	2.68031	2.13715	2.48438	2.40014	1.98761	2.30522	2.34501	1.63053	2.30719	2.54762	2.06093	2.37947	1.63973	2.5928	2.55121	2.14415	2.39681	2.06039	2.57916	1.9529	2.75341	1.55213	2.24225	1.93833	2.415	1.47304	1.49571	1.69378	1.78207	1.60161	1.90463	1.68641	1.24377
PET-Com-7	2.67975	2.07159	2.61558	1.8023	2.24711	1.98073	1.79429	2.19326	2.41083	2.5078	2.26529	2.43073	2.24429	2.28488	2.69393	2.3544	2.629	2.0721	2.42893	2.33999	1.91452	2.25889	2.28645	1.54205	2.24597	2.48386	2.00983	2.31295	1.55334	2.54127	2.4968	2.07926	2.33428	1.99246	2.52715	1.88115	2.70471	1.4589	2.17107	1.86375	2.35493	1.37354	1.39796	1.60973	1.70366	1.51695	1.82854	1.59818	1.15045
PET-Com-8	2.67487	2.06987	2.61034	1.79975	2.24526	1.98278	1.79972	2.19091	2.40905	2.50252	2.265	2.4297	2.28175	2.32501	2.68739	2.34993	2.62416	2.06873	2.42703	2.34705	1.91773	2.25659	2.28115	1.55204	2.24594	2.52426	2.02085	2.35226	1.5611	2.53578	2.49481	2.0783	2.37232	1.99244	2.52288	1.88325	2.69727	1.47247	2.20906	1.86769	2.39384	1.39189	1.43523	1.61469	1.71025	1.52579	1.83216	1.63757	1.158
PET-Com-9	2.6473	2.03612	2.58194	1.77699	2.2123	1.94751	1.76361	2.15883	2.378	2.47171	2.23366	2.39871	2.27493	2.32113	2.65808	2.31929	2.59547	2.03384	2.39631	2.32014	1.88219	2.23584	2.24814	1.51382	2.21337	2.51858	2.00282	2.34427	1.52276	2.50599	2.46594	2.04424	2.36685	1.95789	2.49343	1.8489	2.66738	1.43574	2.20029	1.83201	2.39011	1.35504	1.41272	1.57649	1.67502	1.48893	1.79603	1.6206	1.12284
PET-Com-10	2.66965	2.06552	2.60531	1.79647	2.24186	1.97915	1.79736	2.18625	2.40514	2.49784	2.26062	2.4253	2.28661	2.33044	2.68236	2.345	2.61949	2.0656	2.42253	2.34427	1.91402	2.25354	2.2766	1.55002	2.24202	2.53023	2.02059	2.3578	1.55858	2.53098	2.48986	2.07445	2.37781	1.98822	2.51785	1.87965	2.69222	1.47016	2.21598	1.8648	2.39942	1.39037	1.43837	1.61188	1.70908	1.52407	1.82918	1.6419	1.16141
PET-Com-11	2.73974	2.14913	2.67772	1.86163	2.32128	2.06536	1.8864	2.26678	2.47939	2.57447	2.33737	2.50007	2.31297	2.35262	2.75523	2.42212	2.69201	2.15146	2.49671	2.41044	2.0015	2.31285	2.35813	1.64539	2.3204	2.55139	2.06662	2.38476	1.65438	2.60479	2.56258	2.15772	2.40123	2.07385	2.59096	1.9659	2.76557	1.56549	2.24705	1.95274	2.4198	1.4875	1.50665	1.7088	1.79561	1.61664	1.91937	1.69519	1.26118
PET-Com-12	2.63073	2.01103	2.56476	1.76455	2.19524	1.92142	1.73379	2.1373	2.36179	2.45302	2.21664	2.38163	2.23281	2.28075	2.6422	2.30041	2.5784	2.00839	2.37988	2.30295	1.85599	2.22311	2.22704	1.47717	2.19454	2.48298	1.9856	2.30593	1.48714	2.48908	2.44922	2.02432	2.32787	1.93236	2.47671	1.82116	2.651	1.3945	2.1581	1.80508	2.34725	1.30894	1.35627	1.53946	1.6448	1.45622	1.76566	1.57311	1.09142
PET-Com-13	2.64317	2.0295	2.57775	1.77938	2.20979	1.94124	1.75683	2.15362	2.37534	2.46745	2.2314	2.39621	2.26981	2.31595	2.65434	2.31504	2.59168	2.02684	2.39341	2.31984	1.87583	2.23565	2.24279	1.50398	2.21015	2.51673	2.00329	2.34069	1.51251	2.50212	2.46316	2.04041	2.36285	1.95078	2.48981	1.84235	2.66328	1.42335	2.19506	1.82588	2.38517	1.34074	1.39934	1.56521	1.66827	1.48059	1.78801	1.61267	1.10937
PP-Com-1	0.29145	0.72403	0.36009	2.05455	0.60676	0.80356	1.02546	0.56286	0.35279	0.46943	0.45464	0.38221	2.77	2.81131	0.39267	0.37511	0.31077	0.81489	0.27174	0.74133	0.8867	1.07375	0.55743	1.46875	0.55636	2.94147	1.28993	2.82211	1.44857	0.30617	0.1615	0.68188	2.84599	0.80106	0.22095	0.91654	0.46651	1.66896	2.72483	0.95417	2.86022	1.88265	2.25475	1.42692	1.25114	1.44053	1.01918	2.33375	2.26272
PP-Com-2	0.34216	0.72717	0.35874	2.04591	0.62334	0.81573	1.02984	0.57973	0.41473	0.43144	0.47947	0.42232	2.75939	2.80131	0.4236	0.38704	0.34262	0.8164	0.31844	0.73284	0.89066	1.06549	0.56156	1.46569	0.56946	2.93222	1.28043	2.81234	1.44944	0.34675	0.1716	0.69505	2.83708	0.81729	0.29558	0.9225	0.48878	1.66646	2.71885	0.95235	2.8499	1.8769	2.246	1.41658	1.24768	1.43375	1.03036	2.32459	2.25617
PP-Com-3	0.43687	0.87023	0.46122	2.17155	0.78196	0.98334	1.2069	0.75465	0.60516	0.5615	0.71989	0.56753	2.93634	2.97694	0.39258	0.55739	0.47045	0.89812	0.53374	0.92618	1.09007	1.03866	0.62931	1.63347	0.77317	3.11029	1.40571	2.99324	1.61196	0.31621	0.49792	0.85423	3.01104	0.99239	0.46995	1.09072	0.26915	1.81507	2.89007	1.13258	3.02587	2.03073	2.41818	1.53013	1.38857	1.58614	1.17505	2.50738	2.41065
PP-Com-4	0.5078	0.71297	0.53849	1.99553	0.48618	0.75142	0.96693	0.5997	0.31459	0.56471	0.39787	0.22957	2.61157	2.65578	0.49868	0.45266	0.51386	0.78829	0.27331	0.58892	0.85127	0.98714	0.56757	1.42132	0.49213	2.77273	1.21606	2.65951	1.40853	0.36162	0.35432	0.57921	2.68235	0.79635	0.38609	0.89108	0.48488	1.62472	2.57613	0.88489	2.70335	1.83308	2.15998	1.37502	1.16889	1.36467	0.96754	2.20571	2.21977
PP-Com-5	0.67614	0.57687	0.6182	1.82778	0.31266	0.56855	0.74685	0.50804	0.3024	0.53403	0.22163	0.23685	2.43808	2.49008	0.63356	0.43579	0.60391	0.64956	0.28827	0.43769	0.64629	0.94354	0.50408	1.20665	0.31008	2.60334	1.06569	2.4811	1.21236	0.50619	0.38912	0.40709	2.51555	0.66815	0.49664	0.70921	0.66053	1.42871	2.40604	0.66845	2.53844	1.62724	1.95065	1.18006	0.96165	1.15083	0.78504	1.99573	2.02344
PP-Com-6	0.40801	0.70849	0.39147	2.06653	0.55675	0.78421	1.01445	0.56122	0.30142	0.48922	0.47393	0.36326	2.77929	2.82438	0.33927	0.4117	0.35028	0.76259	0.31567	0.76205	0.89731	1.04102	0.52022	1.47239	0.55084	2.95367	1.28355	2.83504	1.45353	0.29744	0.34246	0.67358	2.85415	0.80691	0.29799	0.9126	0.40531	1.67321	2.73205	0.95065	2.87017	1.89053	2.26821	1.41418	1.23436	1.44156	0.98972	2.34626	2.28949
PP-Com-7	0.37757	0.69574	0.4052	2.02234	0.5276	0.75263	0.9706	0.54388	0.26268	0.48563	0.38408	0.32115	2.71137	2.75576	0.42509	0.38293	0.34667	0.78809	0.23188	0.68274	0.84016	1.05076	0.55099	1.4226	0.4886	2.87958	1.2357	2.76115	1.40817	0.35611	0.18388	0.62839	2.78736	0.77128	0.23861	0.87702	0.52872	1.63155	2.67067	0.90082	2.80263	1.84221	2.20584	1.39542	1.20098	1.39448	0.96809	2.27626	2.23077
Inconnu	2.4941	1.85536	2.41936	1.57686	1.99549	1.73261	1.52228	1.98097	2.1753	2.29681	2.0221	2.17918	2.01313	2.09734	2.49431	2.15032	2.41744	1.83172	2.19313	2.07448	1.65764	2.14047	2.06564	1.24901	1.97876	2.25973	1.80476	2.07085	1.29153	2.33251	2.28267	1.83338	2.12418	1.76767	2.31121	1.64812	2.50653	1.24276	1.99864	1.6095	2.16168	1.1535	1.16891	1.40207	1.44069	1.2836	1.59163	1.332	1.21394
PP-Com-8	0.82038	1.18816	0.78806	2.41835	1.05982	1.29093	1.5028	1.0984	0.91023	0.86288	1.05663	0.90631	3.16693	3.20608	0.65819	0.96016	0.81425	1.16699	0.92143	1.20995	1.41527	1.28314	0.95597	1.92226	1.0906	3.32817	1.66929	3.22149	1.90871	0.75194	0.91295	1.18376	3.2354	1.33197	0.87043	1.41018	0.62415	2.10062	3.12115	1.43621	3.24851	2.30601	2.69456	1.7995	1.6644	1.8787	1.4476	2.77588	2.69178
PP-Com-9	0.58448	0.96541	0.60297	2.24234	0.85386	1.06923	1.28757	0.86874	0.69498	0.6925	0.81974	0.66001	2.98209	3.02405	0.49817	0.69493	0.61125	0.98248	0.66124	1.00397	1.18762	1.08226	0.74401	1.71422	0.87166	3.15103	1.4711	3.03861	1.69519	0.47567	0.66143	0.94486	3.05409	1.09448	0.61584	1.17931	0.39682	1.88995	2.93739	1.21764	3.06984	2.10605	2.4863	1.60716	1.46136	1.66248	1.24547	2.56851	2.49065
PP-Com-10	0.76186	1.14889	0.69458	2.38517	1.03647	1.26887	1.47728	1.05675	0.90899	0.74877	1.02997	0.87647	3.15071	3.19145	0.59965	0.88606	0.73905	1.13022	0.88063	1.16174	1.38651	1.24678	0.89135	1.89559	1.05475	3.31284	1.64317	3.20738	1.88766	0.67633	0.84161	1.15869	3.22033	1.31259	0.82933	1.37119	0.52525	2.07009	3.10639	1.40206	3.23425	2.28205	2.67017	1.75837	1.63357	1.84533	1.43711	2.75313	2.66802
PP-Com-11	0.47942	0.86288	0.50136	2.15744	0.76411	0.96896	1.18893	0.76068	0.59507	0.58305	0.70625	0.54297	2.89611	2.93729	0.42712	0.57754	0.51433	0.89167	0.53126	0.89651	1.07718	1.03132	0.63626	1.61717	0.75899	3.06778	1.38842	2.95177	1.5985	0.34881	0.51937	0.8386	2.97056	0.99032	0.50287	1.08175	0.29635	1.80031	2.85287	1.11701	2.98565	2.01459	2.39205	1.51695	1.36731	1.56897	1.15689	2.47399	2.39726
PP-Com-12	0.23262	0.77821	0.26646	2.13694	0.73308	0.91115	1.13826	0.63434	0.50605	0.42757	0.62134	0.5279	2.91194	2.95267	0.28758	0.41428	0.28491	0.84628	0.42701	0.88422	1.00677	1.07537	0.55767	1.57141	0.69536	3.09295	1.37655	2.97288	1.54648	0.24909	0.307	0.80312	2.98892	0.89655	0.30402	1.00602	0.31227	1.75693	2.86432	1.06829	3.00053	1.97702	2.37334	1.48795	1.34565	1.5404	1.11549	2.47124	2.35776
PS-Com-1	4.77787	4.45839	4.73734	3.86063	4.57769	4.43376	4.37026	4.5252	4.66312	4.67855	4.5816	4.66647	4.81607	4.87352	4.78549	4.60503	4.74468	4.46312	4.66193	4.54596	4.41152	4.64933	4.55161	4.27272	4.5673	4.98872	4.28714	4.87063	4.26195	4.69986	4.69759	4.49614	4.88535	4.42204	4.70038	4.37759	4.77209	4.22353	4.81979	4.39995	4.92599	4.21645	4.32905	4.28622	4.33306	4.27463	4.37466	4.43087	4.23998
PS-Com-2	3.2322	2.74557	3.1717	2.26147	2.92785	2.7017	2.59571	2.84797	3.05223	3.08608	2.92875	3.05787	3.21327	3.29034	3.23776	2.96695	3.18369	2.75433	3.05244	2.96005	2.66661	2.98568	2.90197	2.43133	2.91307	3.45259	2.63785	3.29533	2.42052	3.11513	3.10339	2.79777	3.31472	2.69622	3.11447	2.61956	3.22888	2.35489	3.2184	2.647	3.35849	2.33691	2.49832	2.45489	2.52889	2.43701	2.6075	2.66193	2.39444
PS-Com-3	3.33476	2.86663	3.27632	2.42191	3.04473	2.8268	2.7272	2.96487	3.16225	3.19343	3.04365	3.16827	3.34102	3.41479	3.34045	3.07843	3.28691	2.87588	3.16221	3.07621	2.79361	3.11742	3.01515	2.57332	3.02858	3.57095	2.7845	3.41773	2.5621	3.22262	3.21118	2.92069	3.43773	2.82074	3.22257	2.74844	3.33081	2.50007	3.34338	2.77732	3.48504	2.48595	2.64807	2.59383	2.66707	2.58197	2.73972	2.80482	2.54941
PS-Com-4	3.62915	3.21331	3.57627	2.71251	3.35008	3.1731	3.08874	3.29939	3.4626	3.49569	3.35617	3.46127	3.65612	3.7362	3.63062	3.39786	3.58385	3.22238	3.46125	3.36339	3.1413	3.44675	3.33727	2.96123	3.33573	3.86018	3.08933	3.7178	2.95477	3.52355	3.50872	3.24359	3.74684	3.17252	3.51767	3.11172	3.62275	2.914	3.67682	3.1259	3.79446	2.90104	3.05001	2.98941	3.03232	2.96563	3.10471	3.17183	2.95627
PS-Com-5	4.10023	3.73778	4.05272	3.22247	3.86617	3.70739	3.63854	3.81267	3.96272	3.98312	3.87237	3.96459	4.16768	4.24097	4.10392	3.89977	4.0613	3.74448	3.95995	3.86383	3.68267	3.95577	3.84346	3.53204	3.85292	4.36307	3.6098	4.23096	3.52218	4.00805	4.00356	3.77424	4.25195	3.70073	4.00691	3.65237	4.08994	3.48552	4.1847	3.67013	4.29583	3.47839	3.61775	3.54713	3.59409	3.53384	3.64699	3.73117	3.52712
PS-Com-6	3.65922	3.24104	3.6077	2.80026	3.40303	3.20844	3.1249	3.33022	3.51006	3.53339	3.40246	3.51362	3.71662	3.79122	3.66516	3.43055	3.61677	3.24885	3.5074	3.42918	3.18026	3.47052	3.37123	2.99075	3.38741	3.93647	3.14767	3.79114	2.97807	3.55757	3.55199	3.29113	3.80987	3.2004	3.55879	3.13856	3.65316	2.92501	3.72849	3.16562	3.85693	2.91471	3.07624	3.00457	3.06935	2.99582	3.13145	3.21881	2.97783
PS-Com-7	3.85018	3.45668	3.79987	2.92727	3.58736	3.42041	3.34152	3.53868	3.69451	3.72356	3.59388	3.69424	3.88078	3.95596	3.85225	3.63156	3.80764	3.46689	3.69372	3.58769	3.39123	3.68304	3.57335	3.22374	3.57506	4.0752	3.32149	3.93946	3.21617	3.75148	3.73817	3.48755	3.96537	3.4188	3.74691	3.36024	3.84378	3.17427	3.89835	3.37579	4.01341	3.1639	3.30503	3.24673	3.28956	3.22477	3.35555	3.42006	3.21216
PS-Com-8	3.62813	3.20392	3.57522	2.75411	3.3707	3.17179	3.08677	3.2946	3.47871	3.50029	3.37044	3.48254	3.69141	3.7663	3.63367	3.39691	3.58518	3.21067	3.47587	3.39857	3.14313	3.43556	3.33495	2.94775	3.35396	3.91453	3.11132	3.76729	2.93489	3.52536	3.5205	3.25665	3.78574	3.16285	3.52627	3.10063	3.62159	2.88104	3.7013	3.12869	3.83346	2.8685	3.03575	2.96083	3.02909	2.95433	3.09204	3.18358	2.9289
PS-Com-9	3.63595	3.21298	3.58296	2.75722	3.37827	3.18103	3.09626	3.30348	3.48647	3.50762	3.37826	3.48997	3.70047	3.77586	3.64108	3.40498	3.59291	3.22024	3.48356	3.40453	3.1525	3.44434	3.3435	2.95874	3.36203	3.9226	3.11755	3.77579	2.94607	3.53305	3.52815	3.26486	3.79465	3.17247	3.5339	3.11028	3.62891	2.89293	3.71084	3.13785	3.84237	2.88078	3.04788	2.9719	3.039	2.96474	3.10248	3.1943	2.93972
PS-Com-10	3.32965	2.85991	3.2719	2.35436	3.03739	2.82135	2.72142	2.95863	3.15677	3.1898	3.03561	3.1595	3.31191	3.38138	3.33598	3.07386	3.28399	2.87401	3.15582	3.05036	2.78788	3.04928	3.01097	2.56841	3.02319	3.53985	2.70169	3.38833	2.55591	3.21623	3.20188	2.91085	3.40775	2.81486	3.2167	2.74108	3.32627	2.49385	3.31396	2.77058	3.4526	2.48067	2.63183	2.59005	2.65079	2.56679	2.73158	2.77836	2.53029
PS-Com-11	3.6252	3.19747	3.57098	2.72289	3.36553	3.166	3.07937	3.28775	3.47388	3.49559	3.36407	3.47847	3.68157	3.75351	3.63018	3.39074	3.58136	3.20683	3.47192	3.38615	3.1375	3.43374	3.33026	2.94152	3.35063	3.90133	3.10024	3.75546	2.92857	3.52257	3.51606	3.25191	3.77334	3.15709	3.52406	3.09176	3.6193	2.87172	3.68667	3.12366	3.82168	2.8622	3.02669	2.95511	3.02488	2.94833	3.08721	3.17382	2.91678
LY-01	3.10256	2.66179	3.07117	2.39795	2.51618	2.48792	2.34813	2.73131	2.71481	2.92912	2.57437	2.65396	0.76376	0.70824	3.09502	2.83696	3.06077	2.67787	2.74179	2.34569	2.42691	2.81263	2.81056	2.27604	2.54356	0.4149	2.49398	0.49062	2.34547	2.95112	2.84648	2.45734	0.63644	2.58948	2.92625	2.51745	3.10454	2.35367	0.78339	2.33441	0.7856	2.2814	1.73616	2.41844	2.26657	2.20492	2.45016	1.27278	2.35216
LY-02	3.18978	2.73303	3.15283	2.4567	2.6051	2.56495	2.41832	2.80591	2.80823	3.01095	2.66434	2.74966	0.59776	0.57181	3.18147	2.91461	3.14492	2.74643	2.83507	2.44994	2.50609	2.86045	2.88657	2.33183	2.63213	0.37477	2.54335	0.42289	2.39806	3.03473	2.93792	2.54056	0.48966	2.66257	3.01352	2.58193	3.18894	2.39255	0.83413	2.40837	0.56431	2.31844	1.72716	2.46902	2.32908	2.25607	2.51851	1.26421	2.39879
LY-03	3.78524	3.38473	3.73473	2.87212	3.53804	3.3537	3.27406	3.46923	3.64286	3.66272	3.53974	3.64718	3.85709	3.92793	3.79147	3.56695	3.74404	3.39083	3.64043	3.54859	3.32692	3.61404	3.50664	3.14698	3.5242	4.06872	3.27184	3.92743	3.13512	3.68814	3.68317	3.432	3.94494	3.34423	3.68862	3.28629	3.77917	3.08703	3.86165	3.31176	3.99172	3.07719	3.2353	3.16173	3.22372	3.15157	3.27912	3.37185	3.12369
LY-04	1.06399	0.43499	0.99566	1.46276	0.68379	0.3786	0.38263	0.52055	0.80887	0.90669	0.65972	0.83146	2.26271	2.32658	1.07779	0.68769	1.00421	0.51246	0.79788	0.9246	0.3814	1.00323	0.63653	0.68721	0.65792	2.51029	0.97398	2.34461	0.65411	0.89113	0.87222	0.45684	2.3637	0.37336	0.88037	0.32189	1.08023	0.84274	2.21603	0.37328	2.38759	1.05342	1.47247	0.64185	0.55437	0.62303	0.40093	1.64412	1.45331
LY-05	2.98746	2.54491	2.95329	2.32339	2.39694	2.36799	2.22874	2.61215	2.59591	2.81109	2.45298	2.53286	0.65328	0.64578	2.98006	2.71715	2.94305	2.56117	2.62168	2.22852	2.30783	2.69927	2.69316	2.16411	2.42243	0.43306	2.37337	0.4096	2.23471	2.8335	2.72588	2.33786	0.59807	2.47131	2.80942	2.39966	2.98975	2.24854	0.86028	2.21734	0.70018	2.18168	1.64096	2.31197	2.15312	2.0925	2.33625	1.16928	2.27381
LY-06	2.63239	2.01415	2.56547	1.76987	2.19509	1.92429	1.73821	2.1388	2.36255	2.454	2.21749	2.38338	2.25541	2.30296	2.64253	2.30133	2.57926	2.01052	2.38109	2.30644	1.85925	2.22655	2.22863	1.48391	2.19635	2.50336	1.99312	2.32705	1.49325	2.49007	2.45127	2.0256	2.34899	1.93537	2.47849	1.82459	2.65146	1.4016	2.17984	1.80832	2.37174	1.31998	1.37854	1.54565	1.64981	1.46121	1.77024	1.59406	1.09518
LY-07	3.10098	2.65212	3.06655	2.41466	2.54819	2.49049	2.35028	2.72085	2.73565	2.93395	2.60372	2.68912	0.60792	0.48577	3.09848	2.83323	3.05831	2.66266	2.76423	2.39905	2.43795	2.80405	2.80126	2.27037	2.56915	0.37888	2.53113	0.47498	2.33122	2.94925	2.86284	2.47926	0.42091	2.5764	2.93314	2.50456	3.09935	2.32987	0.51165	2.34397	0.58865	2.26559	1.68132	2.39694	2.26232	2.20433	2.44076	1.22911	2.35206
LY-08	2.33032	1.59341	2.24793	1.39095	1.87122	1.48004	1.25464	1.74185	2.04641	2.12985	1.8892	2.06996	2.01783	2.09984	2.34122	1.9536	2.26267	1.57544	2.05839	2.02202	1.39349	1.93763	1.84651	0.8176	1.83822	2.35518	1.62936	2.13195	0.81241	2.16639	2.1402	1.65108	2.1525	1.47086	2.15015	1.34946	2.3425	0.61127	1.97983	1.36276	2.18478	0.41929	0.71651	0.9211	1.11557	0.86291	1.27729	1.15683	0.60218
LY-09	2.56198	1.90535	2.48761	1.70645	2.13135	1.80682	1.5977	2.03538	2.28208	2.38287	2.13958	2.30934	2.1813	2.24214	2.57031	2.22054	2.49063	1.87727	2.30405	2.25344	1.73886	2.19068	2.12898	1.28694	2.10295	2.4571	1.93134	2.26362	1.29804	2.41238	2.37951	1.94676	2.28578	1.81344	2.39704	1.69016	2.58233	1.18792	2.11768	1.70637	2.32141	1.10353	1.18857	1.39602	1.51137	1.33988	1.6348	1.45998	1.16841
MAG-01	2.13154	1.41469	2.05077	1.35512	1.69716	1.31424	1.08507	1.56251	1.85664	1.94504	1.70442	1.88406	2.03167	2.10773	2.14389	1.76352	2.0651	1.39356	1.87009	1.84939	1.23532	1.7569	1.66665	0.69532	1.6624	2.35269	1.48279	2.14267	0.68485	1.97228	1.94726	1.48527	2.16232	1.30719	1.95949	1.17579	2.15019	0.5243	1.9836	1.20963	2.18835	0.42616	0.79538	0.80107	0.97856	0.75506	1.11057	1.19476	0.69553
MAG-02	2.4696	1.7846	2.39534	1.53134	2.02039	1.68386	1.46304	1.92582	2.19206	2.28421	2.03647	2.21445	2.05677	2.12187	2.48417	2.11272	2.40879	1.77074	2.20796	2.1445	1.60761	2.05268	2.02646	1.11486	2.00295	2.35912	1.76382	2.15742	1.12144	2.31705	2.28288	1.82302	2.17636	1.68522	2.30322	1.55758	2.4914	0.97867	2.00611	1.56329	2.19646	0.85391	0.94628	1.20742	1.35212	1.12667	1.4956	1.27557	0.75393
MAG-04	2.42166	1.70206	2.34777	1.44878	1.88843	1.55173	1.3232	1.84503	2.08932	2.21201	1.9213	2.08769	1.49972	1.59315	2.42997	2.04865	2.35611	1.69293	2.10414	1.963	1.46204	2.00781	1.9489	0.93466	1.86272	1.85733	1.66484	1.62248	0.96674	2.2471	2.20281	1.68903	1.64275	1.57797	2.2291	1.46152	2.42578	0.82239	1.52943	1.40477	1.67682	0.64439	0.27466	1.08411	1.15969	0.93774	1.3742	0.6516	0.8587
MAG-05	3.98893	3.59561	3.93733	2.91297	3.74046	3.55796	3.4779	3.67484	3.84343	3.86387	3.74885	3.84949	3.97954	4.04354	3.9962	3.77839	3.94703	3.59623	3.84319	3.71677	3.52726	3.82615	3.70994	3.34843	3.72541	4.18311	3.417	4.04417	3.33848	3.89301	3.88951	3.63915	4.0597	3.54509	3.89048	3.49236	3.98148	3.29287	3.97371	3.51484	4.10169	3.27652	3.39998	3.36827	3.4298	3.35543	3.48227	3.52868	3.30103
MU-01	3.04361	2.59672	3.01149	2.37846	2.46004	2.42137	2.28069	2.66469	2.65707	2.87144	2.51698	2.59719	0.58527	0.58103	3.03931	2.7726	3.00215	2.6136	2.68315	2.30184	2.36412	2.74774	2.74737	2.20834	2.48599	0.40874	2.43239	0.37271	2.27664	2.88926	2.78766	2.3964	0.54278	2.51965	2.86773	2.44948	3.04566	2.28264	0.87397	2.27257	0.60017	2.21475	1.64845	2.35591	2.20178	2.13603	2.38565	1.17825	2.30736
MU-02	0.7131	0.38797	0.64936	1.72412	0.34734	0.36109	0.57398	0.34104	0.36896	0.5642	0.29874	0.37277	2.41657	2.47234	0.69142	0.3954	0.64264	0.44133	0.34958	0.61601	0.45109	0.90692	0.35711	1.02041	0.2815	2.619	1.00865	2.47614	1.0122	0.50538	0.48189	0.27766	2.50307	0.43172	0.50022	0.51383	0.68187	1.23478	2.37347	0.50313	2.52591	1.44081	1.81392	0.97682	0.79168	0.97689	0.57015	1.91016	1.86403
MU-03	1.83017	1.11884	1.75161	1.30619	1.39384	1.01781	0.79472	1.26313	1.54397	1.65423	1.39643	1.57057	2.02119	2.09455	1.83711	1.45804	1.76433	1.10369	1.56157	1.55693	0.95534	1.48328	1.36971	0.50245	1.36458	2.32297	1.254	2.12544	0.47781	1.66262	1.64429	1.18475	2.14568	1.01959	1.65589	0.88163	1.84206	0.4127	1.97277	0.93286	2.17145	0.47879	0.90597	0.60373	0.73054	0.54986	0.82604	1.22955	0.8626
MU-04	4.26128	3.90628	4.216	3.29153	4.03752	3.88065	3.81129	3.98284	4.13292	4.15005	4.04147	4.13274	4.32211	4.39093	4.2667	4.06881	4.22426	3.91565	4.13023	4.01511	3.85689	4.12773	4.01231	3.70604	4.02653	4.51063	3.7503	4.38234	3.69582	4.17359	4.17098	3.94701	4.40118	3.87221	4.17279	3.8226	4.25309	3.65779	4.32839	3.84381	4.44538	3.64911	3.78253	3.72123	3.77013	3.70954	3.81962	3.89519	3.67573
MU-05	1.60582	0.90532	1.51386	1.3055	1.16785	0.8091	0.60529	1.04789	1.31801	1.40742	1.17969	1.34496	2.07937	2.1493	1.59512	1.23992	1.5315	0.86186	1.33586	1.34764	0.75929	1.30795	1.13166	0.43557	1.13604	2.3658	1.1194	2.17518	0.42531	1.42896	1.41712	0.97099	2.19831	0.82692	1.4324	0.69264	1.60079	0.48744	2.0306	0.73083	2.22302	0.60941	1.06364	0.47695	0.57137	0.47045	0.62511	1.3354	1.03248
MU-06	2.75768	2.14431	2.68555	1.6826	2.38746	2.07547	1.92315	2.27023	2.53518	2.58312	2.39193	2.55294	2.628	2.70532	2.76939	2.4358	2.6968	2.13915	2.53901	2.4701	2.01809	2.45816	2.34261	1.66003	2.35827	2.91629	2.09311	2.72598	1.64794	2.61842	2.60438	2.21405	2.7409	2.06096	2.61332	1.96493	2.75951	1.54005	2.60429	1.9966	2.78867	1.4915	1.68843	1.69933	1.82824	1.68305	1.93271	1.93953	1.57266
MU-07	2.87881	2.28882	2.81036	1.87522	2.52999	2.22849	2.09009	2.415	2.66846	2.70896	2.53269	2.68433	2.76113	2.83876	2.89054	2.57324	2.8222	2.28835	2.6707	2.60462	2.17602	2.59485	2.48072	1.84714	2.49796	3.04362	2.24332	2.8572	1.83493	2.74586	2.73414	2.36334	2.8716	2.2164	2.74252	2.12908	2.87655	1.73579	2.74236	2.15741	2.92075	1.69149	1.87504	1.87569	1.9988	1.86959	2.09635	2.10902	1.78742
MU-08	2.91634	2.43975	2.87869	2.20031	2.29906	2.2547	2.10271	2.51458	2.51225	2.73209	2.36046	2.44959	0.69211	0.75581	2.90838	2.62926	2.86759	2.45525	2.53789	2.15334	2.18938	2.6038	2.59867	2.01566	2.32564	0.61468	2.25259	0.49834	2.08938	2.75593	2.6475	2.2297	0.70629	2.35958	2.72805	2.28021	2.91856	2.09623	0.96592	2.09558	0.78797	2.02087	1.49193	2.17707	2.02166	1.94106	2.21457	1.02715	2.11399
MU-09	2.92065	2.37402	2.85318	1.61153	2.58288	2.32035	2.18428	2.48428	2.72193	2.76299	2.59018	2.73443	2.93489	3.01504	2.92896	2.62607	2.86493	2.36799	2.72404	2.62652	2.27226	2.66427	2.54492	1.97504	2.56407	3.19245	2.24171	3.02083	1.96227	2.79248	2.7836	2.43107	3.03914	2.30567	2.78553	2.21467	2.92226	1.88823	2.9071	2.2509	3.09253	1.8503	2.06687	2.00848	2.1185	1.98977	2.19871	2.28266	1.83955
[truncated: 99 more columns]

## Sheet: CityblockFurthestNeighbor
	LB-1	LB-2	LB-4	LB-5	LB-6	LB-7	LB-8	LB-9	LB-10	LB-11	LB-12	LB-13	LB-14	LB-15	LB-17	LB-20	LB-21	LB-22	LB-23	LB-24	LB-25	LB-26	LB-27	LB-28	LB-29	LB-30	LB-31	LB-32	LB-35	LB-36	LB-37	LB-38	LB-39	LB-40	LB-41	LB-42	LB-43	LB-44	LB-45	LB-46	LB-48	LB-49	LB-50	LB-51	LB-52	LB-53	LB-54	LB-55	LB-56
LB-1	0	16.4548	7.23638	37.1113	14.0698	17.5465	21.143	14.3727	10.0009	11.012	11.8957	9.45138	42.0422	42.0808	6.63613	10.371	6.59508	17.7657	8.3785	14.2603	18.7443	16.4635	13.4393	27.3642	13.5019	43.446	22.3018	41.6544	26.5046	6.5244	6.59196	14.9273	42.7115	17.0156	6.57067	19.793	7.37445	29.547	41.691	19.1603	43.0765	31.3641	36.402	25.6439	24.1408	25.6157	20.2074	36.7948	37.8982
LB-2	16.4548	0	13.6737	28.1409	11.7755	7.05359	9.91908	7.30727	12.3007	11.8094	11.0744	13.243	33.163	33.9625	15.0269	11.0015	14.5625	8.68232	12.208	15.2224	8.93835	16.9468	8.63971	16.0561	10.9378	36.5618	16.9722	34.0609	15.3174	13.4759	13.7137	9.68833	34.3053	7.51969	13.3413	8.25123	14.9225	17.516	32.8374	9.81167	34.7012	20.6663	25.8183	14.1319	13.1522	14.9453	9.80668	26.8975	29.5464
LB-4	7.23638	13.6737	0	35.3207	12.0065	14.6228	17.7991	11.2803	8.60857	6.93695	11.1476	9.54105	40.3846	40.7118	5.09143	8.42584	4.89407	13.9926	8.60289	14.0682	16.6523	17.3571	10.0304	24.6002	11.9221	42.2163	22.1843	40.5871	23.6194	6.14515	7.65347	13.9537	41.1554	15.0111	7.41548	16.4322	6.83551	26.4725	39.4289	16.7558	41.3452	29.2028	33.9641	22.7377	21.4879	23.5308	17.7888	34.686	36.9719
LB-5	37.1113	28.1409	35.3207	0	29.6442	26.2299	23.9268	30.3522	32.3952	33.8107	29.5644	32.5103	35.2443	35.8777	36.6946	32.6068	35.8025	28.4381	32.8627	30.3706	25.5025	34.7084	30.8887	21.1151	30.1036	37.4747	27.3999	36.0116	21.4145	35.0823	33.7517	27.3532	35.6751	26.8856	34.4707	25.445	36.7704	21.9618	34.1315	24.3813	36.8084	22.7066	26.1974	22.4151	22.5987	20.6822	25.0794	28.2378	23.1619
LB-6	14.0698	11.7755	12.0065	29.6442	0	10.2057	12.3562	10.3913	7.11471	10.9596	6.79155	7.56847	33.3714	33.7551	12.4704	10.4127	11.7203	11.2901	8.07965	9.44872	11.4226	17.3585	9.42491	19.0005	5.68594	35.2085	17.2781	33.2242	18.8491	10.8028	10.2639	6.43476	33.4978	12.0538	10.2385	12.8523	12.6767	22.1574	32.5349	9.81258	34.2485	24.2359	28.1042	18.6762	15.9933	16.7981	13.5184	27.9587	31.0993
LB-7	17.5465	7.05359	14.6228	26.2299	10.2057	0	6.50559	8.25688	11.4353	12.3996	10.5555	12.7064	29.8695	30.8892	16.2206	12.3191	15.0274	7.5856	11.9623	14.6721	4.15596	17.6804	8.9068	11.9773	8.94342	34.1276	15.2754	31.038	11.5619	14.3939	14.1365	7.44217	31.028	4.87287	14.0717	6.60379	15.8241	14.5045	29.4358	5.78483	32.0313	16.844	21.7157	11.0725	9.52372	11.2353	6.28836	23.114	26.9481
LB-8	21.143	9.91908	17.7991	23.9268	12.3562	6.50559	0	11.5958	14.344	15.501	13.1227	15.9399	28.1985	29.4397	19.6328	15.5366	17.9161	8.97398	15.3818	16.9032	6.24794	19.9514	12.1548	9.65802	11.4746	31.8841	15.7211	29.384	9.56724	17.8795	17.5041	10.2509	29.0056	8.20033	17.4567	6.47562	19.5118	12.8813	26.9706	6.04469	29.9253	15.4496	19.8036	10.4631	8.29491	9.55567	5.85316	20.9951	24.6661
LB-9	14.3727	7.30727	11.2803	30.3522	10.3913	8.25688	11.5958	0	10.0761	10.1044	9.55835	11.2919	34.5257	35.2344	12.908	8.44945	11.8373	9.70214	10.0716	14.1138	10.2071	17.1007	7.18722	18.107	9.52116	37.7252	18.3467	35.369	17.2981	11.0487	11.5544	9.50457	35.6188	8.43437	10.8995	9.73799	12.9567	19.44	34.4017	11.0933	35.9098	22.9302	27.6784	16.3442	15.3217	17.0642	11.7562	28.5661	31.8043
LB-10	10.0009	12.3007	8.60857	32.3952	7.11471	11.4353	14.344	10.0761	0	9.4289	6.20717	5.21131	35.7981	36.0726	8.87284	8.70759	8.56257	12.7404	4.55045	10.2291	12.9693	15.6662	9.87669	21.1122	7.12129	37.1307	18.2138	35.5492	20.596	7.53351	6.7151	9.32009	36.2718	12.5118	7.04449	14.1822	9.99927	24.0118	34.9413	12.9246	36.8047	25.9703	30.1211	20.3981	18.1456	19.748	14.9463	30.3062	33.5827
LB-11	11.012	11.8094	6.93695	33.8107	10.9596	12.3996	15.501	10.1044	9.4289	0	10.8476	10.1051	38.3999	39.0762	8.5228	9.61711	8.16316	12.1033	9.06703	13.5765	14.2205	17.8687	8.09763	22.0059	10.2999	41.0442	21.3623	38.9489	21.4915	8.65131	9.27151	12.3098	39.1727	13.3012	9.46304	14.5439	8.13568	24.3382	37.6559	14.4871	39.669	26.9969	31.6078	20.327	18.8692	21.0936	15.6961	32.4101	35.4833
LB-12	11.8957	11.0744	11.1476	29.5644	6.79155	10.5555	13.1227	9.55835	6.20717	10.8476	0	6.4034	33.8751	34.0271	11.3783	8.4582	10.9443	12.8758	6.54284	8.48654	12.096	15.1138	10.3889	19.9467	7.17946	35.1526	16.4656	33.7683	19.823	9.68165	7.98808	7.9272	34.346	12.1767	9.13543	13.0005	12.037	22.5057	33.6878	11.6831	34.6616	25.0371	28.9713	19.2196	16.977	18.4154	14.1675	28.8349	31.4832
LB-13	9.45138	13.243	9.54105	32.5103	7.56847	12.7064	15.9399	11.2919	5.21131	10.1051	6.4034	0	35.5939	35.7515	9.33175	8.61346	9.24446	14.3285	4.35713	8.40359	13.9897	14.9301	10.8843	22.6078	8.05862	36.7957	17.7058	34.9906	22.1942	7.21682	5.9387	9.37928	36.1797	13.7361	6.94628	15.6939	9.36612	25.1182	35.4856	13.9561	36.6601	27.1085	31.1602	21.3155	19.0633	20.574	16.3659	31.0363	33.9479
LB-14	42.0422	33.163	40.3846	35.2443	33.3714	29.8695	28.1985	34.5257	35.7981	38.3999	33.8751	35.5939	0	5.07387	41.2458	36.9182	40.6647	34.5027	36.2674	32.7013	29.438	38.8464	36.1377	27.0069	33.6624	9.51754	34.9644	6.28109	26.727	39.2073	38.6294	31.807	4.65414	31.1368	38.8975	30.5723	40.6647	25.1459	9.45848	29.0536	5.37752	24.6413	17.3113	28.641	28.5451	26.2042	29.7814	12.1672	28.6308
LB-15	42.0808	33.9625	40.7118	35.8777	33.7551	30.8892	29.4397	35.2344	36.0726	39.0762	34.0271	35.7515	5.07387	0	41.4492	37.4396	40.889	35.5461	36.3761	32.92	30.5296	38.8652	36.7652	28.192	34.3414	8.5634	35.0191	6.01544	28.0332	39.4118	38.6379	32.3691	4.69716	32.1002	39.1345	31.7143	41.1062	26.6576	9.36031	29.8607	5.72826	25.7757	18.6573	30.0221	29.6746	27.2305	30.5936	13.3979	28.9955
LB-17	6.63613	15.0269	5.09143	36.6946	12.4704	16.2206	19.6328	12.908	8.87284	8.5228	11.3783	9.33175	41.2458	41.4492	0	9.66548	5.62208	15.6623	8.55915	14.121	17.7741	16.6647	11.2671	26.0869	12.4604	42.8953	22.5252	41.0025	25.2872	6.06717	7.69152	14.1803	41.896	16.2736	7.23226	18.4406	6.36535	28.4404	40.4294	17.8762	42.1348	30.558	35.2786	24.3489	22.8847	24.6455	19.0349	35.6459	37.6595
LB-20	10.371	11.0015	8.42584	32.6068	10.4127	12.3191	15.5366	8.44945	8.70759	9.61711	8.4582	8.61346	36.9182	37.4396	9.66548	0	8.72553	12.8052	7.64154	11.9332	14.3004	15.6875	8.82192	22.4387	10.4038	38.6373	19.248	37.3935	21.6658	7.55778	8.10782	11.1933	37.8251	12.5142	7.92573	13.4786	10.0962	23.6215	37.1805	14.5574	38.1967	27.1378	31.8781	20.3751	19.1639	20.5996	16.219	32.3327	34.2274
LB-21	6.59508	14.5625	4.89407	35.8025	11.7203	15.0274	17.9161	11.8373	8.56257	8.16316	10.9443	9.24446	40.6647	40.889	5.62208	8.72553	0	13.9275	8.13236	14.0515	16.748	17.1144	10.1646	24.2011	11.3284	42.2705	22.0447	40.5799	23.5989	5.92588	7.0541	13.6127	41.3793	15.0684	6.51939	17.1308	7.09312	27.1186	39.3208	16.8533	41.5855	29.4747	34.1782	23.3231	21.6514	23.7817	18.0099	34.9615	37.0887
LB-22	17.7657	8.68232	13.9926	28.4381	11.2901	7.5856	8.97398	9.70214	12.7404	12.1033	12.8758	14.3285	34.5027	35.5461	15.6623	12.8052	13.9275	0	13.1876	16.411	8.64567	18.3588	7.85179	13.2375	9.82748	38.2251	18.3118	35.3149	13.3133	14.2215	14.8608	10.3143	35.3305	8.39009	14.1186	8.81093	15.4591	17.4477	32.4571	8.98969	36.0188	19.5638	24.8981	13.3374	12.2691	14.4697	8.53183	26.8051	29.0124
LB-23	8.3785	12.208	8.60289	32.8627	8.07965	11.9623	15.3818	10.0716	4.55045	9.06703	6.54284	4.35713	36.2674	36.3761	8.55915	7.64154	8.13236	13.1876	0	9.7463	13.1954	14.8883	9.74285	21.7973	7.30175	37.9801	17.8597	35.9649	21.3129	6.25122	5.067	9.35843	36.9739	12.3886	5.38171	14.9281	8.41465	24.5107	35.9986	13.4671	37.4883	26.2287	30.7671	20.4561	18.5988	20.1599	15.5379	31.1413	33.9181
LB-24	14.2603	15.2224	14.0682	30.3706	9.44872	14.6721	16.9032	14.1138	10.2291	13.5765	8.48654	8.40359	32.7013	32.92	14.121	11.9332	14.0515	16.411	9.7463	0	15.5439	17.1797	13.6312	23.2568	10.2723	33.3759	17.4043	32.1254	23.3	12.3444	10.6011	11.5281	33.0666	16.2753	12.3521	17.1502	14.0695	26.031	32.7829	14.9584	33.6558	27.786	29.7722	22.382	19.631	20.8962	18.1662	28.6377	32.8501
LB-25	18.7443	8.93835	16.6523	25.5025	11.4226	4.15596	6.24794	10.2071	12.9693	14.2205	12.096	13.9897	29.438	30.5296	17.7741	14.3004	16.748	8.64567	13.1954	15.5439	0	18.8228	10.5711	10.7473	9.78781	33.8809	15.0798	30.3608	10.1292	15.8745	15.4868	8.40038	30.5172	4.91422	15.1166	7.31301	17.2713	13.7485	28.7601	5.0645	31.6737	14.9866	20.356	10.0332	8.52828	9.87874	5.74387	22.1248	25.5803
LB-26	16.4635	16.9468	17.3571	34.7084	17.3585	17.6804	19.9514	17.1007	15.6662	17.8687	15.1138	14.9301	38.8464	38.8652	16.6647	15.6875	17.1144	18.3588	14.8883	17.1797	18.8228	0	16.5705	25.3737	17.2567	40.4853	14.8429	38.9713	24.6205	15.1509	14.4859	16.0406	40.0023	17.7525	15.7552	19.0177	16.6754	26.8929	39.1956	19.006	40.1347	29.1609	33.3429	23.544	21.2086	22.8948	19.6994	33.4653	35.488
LB-27	13.4393	8.63971	10.0304	30.8887	9.42491	8.9068	12.1548	7.18722	9.87669	8.09763	10.3889	10.8843	36.1377	36.7652	11.2671	8.82192	10.1646	7.85179	9.74285	13.6312	10.5711	16.5705	0	17.9091	8.11609	39.2734	18.8286	36.5081	17.0977	9.71954	10.8034	9.61211	36.7671	8.98806	9.99052	11.0343	10.9186	20.7145	35.0907	10.9936	37.6052	22.9166	28.1314	16.593	15.0308	17.3579	11.9599	29.2475	32.1384
LB-28	27.3642	16.0561	24.6002	21.1151	19.0005	11.9773	9.65802	18.107	21.1122	22.0059	19.9467	22.6078	27.0069	28.192	26.0869	22.4387	24.2011	13.2375	21.7973	23.2568	10.7473	25.3737	17.9091	0	17.3697	31.5031	19.8647	28.318	3.72561	24.4676	23.919	16.3824	27.9626	12.4361	23.4987	12.5456	25.8337	7.76245	25.2477	11.4331	29.0987	8.36348	14.4618	7.50388	8.55672	6.49896	9.54984	17.9443	19.3098
LB-29	13.5019	10.9378	11.9221	30.1036	5.68594	8.94342	11.4746	9.52116	7.12129	10.2999	7.17946	8.05862	33.6624	34.3414	12.4604	10.4038	11.3284	9.82748	7.30175	10.2723	9.78781	17.2567	8.11609	17.3697	0	36.1794	16.4747	33.8747	17.313	10.6546	9.89816	6.51102	34.2433	10.4962	9.50278	12.0965	12.1094	21.5798	32.5904	9.52601	35.0989	22.5836	27.0478	17.3456	14.5972	16.3944	11.9931	27.4881	31.2217
LB-30	43.446	36.5618	42.2163	37.4747	35.2085	34.1276	31.8841	37.7252	37.1307	41.0442	35.1526	36.7957	9.51754	8.5634	42.8953	38.6373	42.2705	38.2251	37.9801	33.3759	33.8809	40.4853	39.2734	31.5031	36.1794	0	36.4533	6.77808	31.7558	40.8376	39.7193	34.6163	7.49013	35.6221	40.6109	33.8942	42.7619	30.5303	11.7919	32.9746	8.44247	30.3737	24.0692	33.5878	32.7557	30.679	34.2441	18.1051	31.8599
LB-31	22.3018	16.9722	22.1843	27.3999	17.2781	15.2754	15.7211	18.3467	18.2138	21.3623	16.4656	17.7058	34.9644	35.0191	22.5252	19.248	22.0447	18.3118	17.8597	17.4043	15.0798	14.8429	18.8286	19.8647	16.4747	36.4533	0	34.6493	19.5864	20.6873	18.9352	14.7675	35.6421	15.9926	19.7553	16.144	22.3976	22.6415	34.7778	15.2876	36.036	23.8911	28.6345	20.0093	16.6301	17.5357	16.5233	28.731	30.1022
LB-32	41.6544	34.0609	40.5871	36.0116	33.2242	31.038	29.384	35.369	35.5492	38.9489	33.7683	34.9906	6.28109	6.01544	41.0025	37.3935	40.5799	35.3149	35.9649	32.1254	30.3608	38.9713	36.5081	28.318	33.8747	6.77808	34.6493	0	28.1231	39.194	38.0734	31.992	5.28056	32.1406	38.6501	31.7586	40.6388	27.2894	9.93586	29.693	6.50316	26.1837	19.7827	30.1318	29.6063	27.2095	30.9026	14.0051	29.2738
LB-35	26.5046	15.3174	23.6194	21.4145	18.8491	11.5619	9.56724	17.2981	20.596	21.4915	19.823	22.1942	26.727	28.0332	25.2872	21.6658	23.5989	13.3133	21.3129	23.3	10.1292	24.6205	17.0977	3.72561	17.313	31.7558	19.5864	28.1231	0	23.4411	23.3482	15.9279	27.9379	11.3914	22.732	11.8862	24.8792	6.47226	25.5635	11.0948	29.0442	7.78921	14.2111	6.87754	8.5144	6.40787	8.94613	17.7612	19.0199
LB-36	6.5244	13.4759	6.14515	35.0823	10.8028	14.3939	17.8795	11.0487	7.53351	8.65131	9.68165	7.21682	39.2073	39.4118	6.06717	7.55778	5.92588	14.2215	6.25122	12.3444	15.8745	15.1509	9.71954	24.4676	10.6546	40.8376	20.6873	39.194	23.4411	0	6.09918	12.1827	40.0462	14.1137	5.45805	16.646	5.6899	26.5459	38.8269	16.1547	40.3115	28.7803	33.6454	22.5015	21.0893	22.8652	17.8554	34.0067	36.3032
LB-37	6.59196	13.7137	7.65347	33.7517	10.2639	14.1365	17.5041	11.5544	6.7151	9.27151	7.98808	5.9387	38.6294	38.6379	7.69152	8.10782	7.0541	14.8608	5.067	10.6011	15.4868	14.4859	10.8034	23.919	9.89816	39.7193	18.9352	38.0734	23.3482	6.09918	0	11.3233	39.1747	14.1189	5.30967	16.5254	8.36851	26.4109	38.1521	15.5581	39.4587	28.4129	33.1546	22.492	20.4302	22.0163	17.596	33.2653	35.0575
LB-38	14.9273	9.68833	13.9537	27.3532	6.43476	7.44217	10.2509	9.50457	9.32009	12.3098	7.9272	9.37928	31.807	32.3691	14.1803	11.1933	13.6127	10.3143	9.35843	11.5281	8.40038	16.0406	9.61211	16.3824	6.51102	34.6163	14.7675	31.992	15.9279	12.1827	11.3233	0	32.3363	8.58228	11.1986	10.4353	13.8374	19.4941	31.4676	7.46885	33.1925	20.962	25.794	15.7851	13.1489	13.5623	10.7368	25.8797	28.3725
LB-39	42.7115	34.3053	41.1554	35.6751	33.4978	31.028	29.0056	35.6188	36.2718	39.1727	34.346	36.1797	4.65414	4.69716	41.896	37.8251	41.3793	35.3305	36.9739	33.0666	30.5172	40.0023	36.7671	27.9626	34.2433	7.49013	35.6421	5.28056	27.9379	40.0462	39.1747	32.3363	0	32.3999	39.4305	31.3518	41.5593	26.5966	8.55535	29.5866	5.19208	26.0389	19.0195	30.0269	29.4526	26.9876	30.693	13.282	29.2964
LB-40	17.0156	7.51969	15.0111	26.8856	12.0538	4.87287	8.20033	8.43437	12.5118	13.3012	12.1767	13.7361	31.1368	32.1002	16.2736	12.5142	15.0684	8.39009	12.3886	16.2753	4.91422	17.7525	8.98806	12.4361	10.4962	35.6221	15.9926	32.1406	11.3914	14.1137	14.1189	8.58228	32.3999	0	13.4038	7.2973	15.5306	14.8798	30.9345	7.08601	33.4836	16.443	22.3029	11.6709	10.5044	11.5272	7.04575	24.1273	27.0293
LB-41	6.57067	13.3413	7.41548	34.4707	10.2385	14.0717	17.4567	10.8995	7.04449	9.46304	9.13543	6.94628	38.8975	39.1345	7.23226	7.92573	6.51939	14.1186	5.38171	12.3521	15.1166	15.7552	9.99052	23.4987	9.50278	40.6109	19.7553	38.6501	22.732	5.45805	5.30967	11.1986	39.4305	13.4038	0	16.3924	7.69435	26.3024	38.3934	15.495	40.0088	27.9129	32.9841	22.3207	20.4089	22.0329	17.0465	33.3621	35.2972
LB-42	19.793	8.25123	16.4322	25.445	12.8523	6.60379	6.47562	9.73799	14.1822	14.5439	13.0005	15.6939	30.5723	31.7143	18.4406	13.4786	17.1308	8.81093	14.9281	17.1502	7.31301	19.0177	11.0343	12.5456	12.0965	33.8942	16.144	31.7586	11.8862	16.646	16.5254	10.4353	31.3518	7.2973	16.3924	0	18.3761	14.1467	29.8407	7.9093	32.0438	17.7865	22.7338	11.7848	10.7008	11.8691	7.41205	23.9132	26.6053
LB-43	7.37445	14.9225	6.83551	36.7704	12.6767	15.8241	19.5118	12.9567	9.99927	8.13568	12.037	9.36612	40.6647	41.1062	6.36535	10.0962	7.09312	15.4591	8.41465	14.0695	17.2713	16.6754	10.9186	25.8337	12.1094	42.7619	22.3976	40.6388	24.8792	5.6899	8.36851	13.8374	41.5593	15.5306	7.69435	18.3761	0	27.9733	40.476	17.6781	42.0911	29.9897	34.9716	23.44	22.3421	24.1804	19.2827	35.47	37.989
LB-44	29.547	17.516	26.4725	21.9618	22.1574	14.5045	12.8813	19.44	24.0118	24.3382	22.5057	25.1182	25.1459	26.6576	28.4404	23.6215	27.1186	17.4477	24.5107	26.031	13.7485	26.8929	20.7145	7.76245	21.5798	30.5303	22.6415	27.2894	6.47226	26.5459	26.4109	19.4941	26.5966	14.8798	26.3024	14.1467	27.9733	0	25.2355	14.7047	27.5355	6.58508	13.02	7.99495	11.9979	9.08166	12.607	17.2792	18.0058
LB-45	41.691	32.8374	39.4289	34.1315	32.5349	29.4358	26.9706	34.4017	34.9413	37.6559	33.6878	35.4856	9.45848	9.36031	40.4294	37.1805	39.3208	32.4571	35.9986	32.7829	28.7601	39.1956	35.0907	25.2477	32.5904	11.7919	34.7778	9.93586	25.5635	38.8269	38.1521	31.4676	8.55535	30.9345	38.3934	29.8407	40.476	25.2355	0	27.995	9.94249	23.9582	16.8703	28.1039	27.2876	25.6617	28.3903	11.8179	28.3035
LB-46	19.1603	9.81167	16.7558	24.3813	9.81258	5.78483	6.04469	11.0933	12.9246	14.4871	11.6831	13.9561	29.0536	29.8607	17.8762	14.5574	16.8533	8.98969	13.4671	14.9584	5.0645	19.006	10.9936	11.4331	9.52601	32.9746	15.2876	29.693	11.0948	16.1547	15.5581	7.46885	29.5866	7.08601	15.495	7.9093	17.6781	14.7047	27.995	0	30.8252	15.9741	20.7982	10.7473	8.36508	9.00933	6.35756	21.6784	25.3146
LB-48	43.0765	34.7012	41.3452	36.8084	34.2485	32.0313	29.9253	35.9098	36.8047	39.669	34.6616	36.6601	5.37752	5.72826	42.1348	38.1967	41.5855	36.0188	37.4883	33.6558	31.6737	40.1347	37.6052	29.0987	35.0989	8.44247	36.036	6.50316	29.0442	40.3115	39.4587	33.1925	5.19208	33.4836	40.0088	32.0438	42.0911	27.5355	9.94249	30.8252	0	27.3011	20.1412	31.2021	30.4472	28.1792	31.5516	14.2871	30.1589
LB-49	31.3641	20.6663	29.2028	22.7066	24.2359	16.844	15.4496	22.9302	25.9703	26.9969	25.0371	27.1085	24.6413	25.7757	30.558	27.1378	29.4747	19.5638	26.2287	27.786	14.9866	29.1609	22.9166	8.36348	22.5836	30.3737	23.8911	26.1837	7.78921	28.7803	28.4129	20.962	26.0389	16.443	27.9129	17.7865	29.9897	6.58508	23.9582	15.9741	27.3011	0	10.0802	9.61483	13.2444	10.0287	14.3291	15.4097	14.814
LB-50	36.402	25.8183	33.9641	26.1974	28.1042	21.7157	19.8036	27.6784	30.1211	31.6078	28.9713	31.1602	17.3113	18.6573	35.2786	31.8781	34.1782	24.8981	30.7671	29.7722	20.356	33.3429	28.1314	14.4618	27.0478	24.0692	28.6345	19.7827	14.2111	33.6454	33.1546	25.794	19.0195	22.3029	32.9841	22.7338	34.9716	13.02	16.8703	20.7982	20.1412	10.0802	0	16.2292	17.9109	15.468	19.7031	7.93801	17.6163
LB-51	25.6439	14.1319	22.7377	22.4151	18.6762	11.0725	10.4631	16.3442	20.3981	20.327	19.2196	21.3155	28.641	30.0221	24.3489	20.3751	23.3231	13.3374	20.4561	22.382	10.0332	23.544	16.593	7.50388	17.3456	33.5878	20.0093	30.1318	6.87754	22.5015	22.492	15.7851	30.0269	11.6709	22.3207	11.7848	23.44	7.99495	28.1039	10.7473	31.2021	9.61483	16.2292	0	8.92216	7.67195	9.50076	20.5146	21.317
LB-52	24.1408	13.1522	21.4879	22.5987	15.9933	9.52372	8.29491	15.3217	18.1456	18.8692	16.977	19.0633	28.5451	29.6746	22.8847	19.1639	21.6514	12.2691	18.5988	19.631	8.52828	21.2086	15.0308	8.55672	14.5972	32.7557	16.6301	29.6063	8.5144	21.0893	20.4302	13.1489	29.4526	10.5044	20.4089	10.7008	22.3421	11.9979	27.2876	8.36508	30.4472	13.2444	17.9109	8.92216	0	7.25542	7.95562	19.6516	23.3743
LB-53	25.6157	14.9453	23.5308	20.6822	16.7981	11.2353	9.55567	17.0642	19.748	21.0936	18.4154	20.574	26.2042	27.2305	24.6455	20.5996	23.7817	14.4697	20.1599	20.8962	9.87874	22.8948	17.3579	6.49896	16.3944	30.679	17.5357	27.2095	6.40787	22.8652	22.0163	13.5623	26.9876	11.5272	22.0329	11.8691	24.1804	9.08166	25.6617	9.00933	28.1792	10.0287	15.468	7.67195	7.25542	0	9.54845	17.4237	19.7711
LB-54	20.2074	9.80668	17.7888	25.0794	13.5184	6.28836	5.85316	11.7562	14.9463	15.6961	14.1675	16.3659	29.7814	30.5936	19.0349	16.219	18.0099	8.53183	15.5379	18.1662	5.74387	19.6994	11.9599	9.54984	11.9931	34.2441	16.5233	30.9026	8.94613	17.8554	17.596	10.7368	30.693	7.04575	17.0465	7.41205	19.2827	12.607	28.3903	6.35756	31.5516	14.3291	19.7031	9.50076	7.95562	9.54845	0	21.6103	24.8198
LB-55	36.7948	26.8975	34.686	28.2378	27.9587	23.114	20.9951	28.5661	30.3062	32.4101	28.8349	31.0363	12.1672	13.3979	35.6459	32.3327	34.9615	26.8051	31.1413	28.6377	22.1248	33.4653	29.2475	17.9443	27.4881	18.1051	28.731	14.0051	17.7612	34.0067	33.2653	25.8797	13.282	24.1273	33.3621	23.9132	35.47	17.2792	11.8179	21.6784	14.2871	15.4097	7.93801	20.5146	19.6516	17.4237	21.6103	0	20.6252
LB-56	37.8982	29.5464	36.9719	23.1619	31.0993	26.9481	24.6661	31.8043	33.5827	35.4833	31.4832	33.9479	28.6308	28.9955	37.6595	34.2274	37.0887	29.0124	33.9181	32.8501	25.5803	35.488	32.1384	19.3098	31.2217	31.8599	30.1022	29.2738	19.0199	36.3032	35.0575	28.3725	29.2964	27.0293	35.2972	26.6053	37.989	18.0058	28.3035	25.3146	30.1589	14.814	17.6163	21.317	23.3743	19.7711	24.8198	20.6252	0
LB-57	16.8975	7.21498	13.9345	27.2112	10.0569	3.7985	7.5435	8.31967	11.2526	11.6091	10.812	12.4679	31.1423	32.1813	15.5273	11.9256	14.1189	6.64969	11.523	14.6669	4.77749	17.6602	8.00858	12.7774	8.64094	35.2969	15.9512	32.1133	12.101	13.7721	13.4694	7.40208	32.2462	5.16822	13.3188	7.3257	15.0742	15.4813	30.1597	5.9196	33.1356	17.4593	22.4289	11.4168	9.7498	11.7479	6.49597	23.9134	27.7106
LB-58	20.1233	11.424	18.7537	24.8232	12.0732	6.92329	7.34743	12.7764	14.0069	16.4624	12.9846	14.8321	28.4282	29.1542	19.3746	16.425	18.6793	11.0548	14.2281	15.8791	5.9834	19.4734	12.8237	10.8126	10.4585	32.3498	14.9153	28.9859	10.7958	17.5336	16.6863	9.25541	29.3501	7.86366	16.5412	9.51905	18.8253	14.4777	27.4313	5.40696	30.1369	15.0562	19.9335	11.1128	8.38827	9.12517	6.90218	20.9572	25.1906
LB-59	40.0233	31.6153	38.1829	33.3869	30.4613	28.7972	26.7163	33.1785	33.3337	36.5203	31.4103	33.3999	7.23225	7.87109	38.7611	35.0956	38.2198	32.6183	34.1225	30.0229	28.3658	36.6986	34.2745	25.593	31.5215	9.18606	32.3595	6.9326	25.7146	37.1852	36.0419	29.6296	7.29426	30.2063	36.6892	28.8566	38.8117	24.9116	8.87557	27.3371	7.58439	24.2026	17.7874	28.1046	27.0454	24.5182	28.4613	11.609	26.7256
LB-60	18.1382	13.9147	17.0363	28.3662	14.4573	12.4511	13.5613	13.3741	14.0656	16.446	13.4814	13.8951	31.8819	32.0752	18.045	14.9658	17.2911	15.1991	13.6264	16.2198	12.2964	20.6202	14.8597	17.3256	13.7253	33.7819	17.649	31.7054	16.1837	16.0191	14.803	12.8623	32.6748	11.8798	15.4034	13.5625	17.957	19.2068	31.2593	13.7865	33.048	20.6831	24.8537	17.8563	16.6456	16.7553	14.3981	25.8089	27.2894
LB-61	10.3992	11.2447	10.1049	32.1268	7.76651	11.1417	14.3132	9.40622	5.51075	9.32639	6.59823	6.5953	35.6636	36.0216	9.76901	8.93303	9.44925	12.3857	5.78428	10.595	12.3876	15.6129	9.50708	20.9057	7.21226	37.7033	17.992	35.5479	20.4946	8.55697	7.3008	8.31846	36.3195	11.6843	7.34545	13.6988	10.0425	23.6422	35.2542	12.1902	36.7809	25.3258	30.2213	19.5947	17.7178	18.926	14.1119	30.3043	32.9319
LB-62	11.4362	11.7534	9.80293	32.6097	11.7455	13.6213	16.5106	9.99806	10.403	11.0102	9.74845	9.6976	37.109	37.6056	10.8063	6.58863	10.4963	13.7077	9.15254	12.4517	15.5663	14.5963	10.0063	23.4403	11.9338	38.4898	19.5878	37.8926	22.6923	8.75888	9.1107	12.2725	38.1233	14.2055	9.96067	14.2808	10.9167	24.2481	37.3758	15.7633	38.1789	28.2077	32.5565	21.2672	20.0181	21.5544	17.2408	32.9614	34.7319
LB-63	26.5084	15.6404	24.5733	21.9326	19.7664	12.1151	11.1538	18.0205	21.5415	22.089	20.3314	22.4616	26.4609	27.662	25.7658	22.0956	24.8936	15.2543	21.5726	23.4926	10.2244	24.4433	18.336	5.51094	18.2523	31.775	19.713	27.8836	4.3564	23.9115	23.6558	16.4226	27.7997	11.8489	23.2099	12.9895	25.0131	6.30844	26.1372	11.4769	29.0018	7.06712	13.6454	5.87769	8.91438	6.02898	9.85194	17.6832	19.1129
LB-64	17.2587	8.1923	15.0783	25.7247	9.97463	4.36922	7.0322	9.11101	11.603	13.1664	10.6873	12.5625	30.4842	31.0664	16.2447	12.7566	15.3185	8.26966	11.7081	14.6028	4.57224	17.035	9.4418	12.3684	8.94976	34.2365	14.162	30.9858	11.6268	14.192	13.601	6.6826	31.2673	5.01424	13.4924	7.05994	15.7229	15.4976	29.7482	4.89777	32.1447	16.837	22.3482	11.5326	9.57217	10.4087	6.40135	23.0996	26.3387
LB-65	10.6225	9.67075	8.2243	31.9713	8.9141	9.67481	13.5796	6.80982	7.81122	7.92337	8.46293	8.65076	36.0014	36.6927	9.80366	6.19592	8.26971	10.274	7.11417	12.4503	11.461	16.2818	6.54454	19.7552	7.68642	38.892	18.7126	36.4185	19.0218	7.7699	8.06337	9.51804	36.8167	9.71399	7.0226	11.981	9.60328	21.836	35.4239	11.9664	37.389	24.431	29.3816	18.1316	16.6291	18.4211	13.5188	30.0934	33.1409
LB-66	11.8097	10.7221	9.9567	32.8112	10.1912	11.3107	14.8443	7.75418	8.67056	10.2579	8.88194	9.72301	36.2486	36.8916	11.1522	7.23989	9.98571	12.3148	8.43417	13.3123	13.2412	17.2969	8.9405	21.4215	9.36324	38.9513	19.7119	36.8299	20.6977	9.11718	9.61868	10.5073	37.2054	11.5057	8.42959	13.0117	11.3119	22.877	36.366	13.4439	37.5825	26.1703	30.8829	19.7062	18.3381	19.8527	15.0857	31.2358	34.4284
LB-67	21.4572	10.5065	18.0096	23.6932	13.9156	7.65615	5.19744	12.1301	15.5421	16.3313	14.8505	17.0869	29.1703	30.3676	20.0401	15.8931	18.2026	8.94091	16.3866	18.7305	7.40988	20.4095	12.5698	9.24336	12.7874	32.7074	16.5412	30.2027	8.56831	18.1666	18.3045	11.4391	30.023	8.38861	17.8251	6.76189	19.9327	12.1587	27.7834	7.64131	30.8929	14.675	19.9253	9.54499	8.75471	9.4491	6.15077	21.6269	23.859
LB-68	16.1651	12.3291	14.6713	27.4541	9.39467	11.5712	13.2644	12.8025	11.1604	14.1477	9.38615	10.5089	32.5986	32.5649	14.9845	12.3711	14.893	12.8452	11.2966	8.23665	12.6359	15.2942	12.4804	19.5095	10.161	34.0312	14.4016	32.544	19.4186	13.3466	12.4018	9.54421	33.136	13.4626	13.7239	13.5531	15.4717	22.2145	32.0191	11.6646	33.4537	24.3248	27.5279	18.9719	15.9079	17.3188	14.4964	27.2238	29.6658
PP-1	5.8789	18.202	8.11911	38.5312	15.6283	19.3072	22.905	15.9046	11.8653	11.5896	13.6411	11.1674	43.2661	43.4205	7.40388	11.9955	8.03592	19.5664	10.4369	15.6855	20.5262	18.3267	14.9313	29.1108	15.3032	44.5524	24.3378	43.0079	28.2461	8.30373	8.71092	16.7653	43.9867	18.7851	8.80473	21.3784	8.19957	30.894	43.1848	20.8902	44.5132	33.273	38.1503	27.0034	25.9238	27.3316	22.7182	38.5768	39.7483
PS-1'	64.2003	54.8422	62.0408	46.8567	57.877	53.9248	52.0033	56.8223	59.9015	60.6995	57.3624	60.1053	56.0305	56.9433	63.4108	58.2558	62.6969	55.9835	60.3755	58.6855	53.6915	61.9892	58.1777	49.3775	58.0236	57.9135	55.9301	57.6033	49.4339	62.0015	61.3448	56.4419	56.9604	54.6065	61.9386	52.5409	63.5894	47.2325	55.4614	53.3434	57.2455	47.2894	47.6714	49.9812	51.7737	49.6309	53.1717	50.2817	48.6193
PS-1	56.0473	46.0633	54.2372	38.108	49.6352	45.2353	42.622	48.243	51.6203	52.6444	48.9668	52.0348	47.3406	48.2472	55.5519	50.268	54.9039	47.5934	52.1447	50.6018	44.8528	52.7674	50.0339	39.5346	50.0383	49.2155	46.6411	49.0238	39.5377	54.1147	53.4007	48.0486	48.2873	46.0378	53.9852	43.5943	55.7081	36.3518	47.2253	44.6285	48.3739	35.9631	38.2557	39.7202	42.6698	40.0144	43.9299	41.5134	36.1831
PVC-1	46.4081	36.4939	44.2596	35.6373	39.8498	35.399	32.7088	38.6822	42.0163	42.4251	39.375	42.2689	37.1585	38.4022	45.6981	40.6461	44.9147	37.6733	42.4505	41.4811	34.8024	42.4211	39.9233	29.786	40.312	40.2426	37.529	39.2508	29.6971	44.2408	43.4236	38.0213	38.3292	36.3486	44.2147	33.4262	45.9773	26.5497	38.1185	34.398	38.3577	25.6667	26.9792	29.5004	31.8998	29.4479	33.8578	30.6185	26.7667
PE-1	40.2504	36.6709	41.6849	36.5243	34.7049	34.237	32.8048	37.9676	36.343	40.9903	34.6015	35.0766	15.4081	13.9975	41.1459	38.8686	41.3912	38.2676	36.1023	32.104	33.2665	38.3876	39.3591	32.0931	35.4855	10.9526	34.8582	11.7839	32.0036	39.6281	37.897	33.375	13.8578	34.8892	38.6893	35.1781	41.3362	32.1039	16.8517	32.7392	15.4771	31.293	26.5233	34.0712	33.0873	30.7107	33.771	21.1715	31.4366
PET-1	48.9053	40.6662	48.1163	35.377	41.7905	38.3925	36.0194	42.9443	44.297	46.4724	42.0068	44.5165	38.0491	38.2305	48.9408	44.8864	48.2427	41.103	44.7756	43.093	37.4177	43.7863	43.6882	31.7297	42.6099	39.9173	39.2202	38.7657	31.8885	47.523	45.786	39.8189	38.549	39.0351	46.7724	38.0796	49.4009	29.7388	37.8443	36.7574	38.9657	27.4421	28.5644	32.9951	34.1684	30.9345	36.6624	31.1066	21.6209
PE-1'	40.5172	36.8286	41.8138	37.8321	35.214	34.3089	32.9195	38.0879	36.4748	41.1437	34.8254	35.392	12.7023	11.232	41.2625	38.9868	41.5516	38.519	36.4913	32.3988	33.4267	38.6261	39.5728	32.0858	35.7604	8.02374	35.1283	9.15448	32.0731	39.9471	38.1274	34.0494	11.1927	35.1651	39.0704	35.3072	41.5611	31.6568	15.2847	33.0125	12.2481	30.6042	25.2982	34.0051	33.192	30.982	33.7417	19.7164	31.9078
PVC-1'	43.28	33.6661	41.4203	33.3226	37.2367	32.4226	29.9272	35.8983	39.2786	39.6998	36.5717	39.4152	34.2457	35.4261	42.7779	37.8824	42.158	34.8618	39.5726	38.8398	31.8676	39.4825	37.3341	26.8973	37.4763	37.4604	34.5913	36.4026	26.778	41.3044	40.5053	35.2201	35.4827	33.3471	41.2336	30.8261	43.0301	23.4623	35.274	31.7267	35.5368	22.6123	24.1074	26.6653	29.0656	26.5998	30.8247	27.7693	23.6328
PU	38.5437	28.6632	36.1545	24.8871	30.9988	26.12	23.4028	30.5577	32.8129	34.6563	31.1944	33.8736	29.4266	30.4466	37.5793	33.6283	36.4673	27.9483	33.6747	34.0825	25.2498	35.0415	30.9711	18.654	30.6878	33.2494	30.5533	30.8859	18.9076	35.9937	35.1191	28.9725	30.5326	26.7872	35.5148	25.5364	37.7833	17.4492	29.4364	24.9035	31.2499	14.6052	17.314	20.0729	21.9694	19.5545	24.2337	21.1398	15.7654
ABS	53.0546	43.8218	51.3746	34.3394	46.856	42.4998	40.4062	46.2852	48.9879	49.5903	46.6258	49.0803	45.7724	46.3871	52.6765	48.3139	51.8736	44.6268	49.1197	47.2484	41.8078	50.6359	46.964	37.0176	46.8611	47.9803	43.5005	46.8813	36.9811	51.0583	50.279	45.0234	46.5985	42.9843	50.6606	41.4168	52.3744	34.8488	45.3957	41.775	47.1362	33.681	36.0214	37.4833	39.8559	37.6882	41.2446	39.1925	35.7324
PA66	45.508	37.2999	44.251	35.27	39.5538	35.3233	32.0402	39.0527	40.795	43.148	39.0572	41.6512	36.4673	36.8792	45.1365	41.5136	43.6515	36.0748	41.6733	41.2481	34.4063	41.4619	40.0178	27.7879	39.2564	38.3057	37.1643	37.2702	28.2198	43.9146	42.6398	38.0321	37.242	35.7031	43.2523	34.0258	46.0703	26.4956	35.9437	34.487	37.6343	24.8755	26.2788	30.4119	32.0756	29.7271	32.8814	28.9249	26.1364
PC	50.4854	43.9611	50.6506	40.3595	45.8752	42.2998	40.4898	46.2416	47.8253	49.3618	45.9771	47.6162	45.1471	45.9042	50.9943	47.7269	50.8089	44.5139	47.6175	47.7921	41.0819	47.2914	46.7825	36.1466	46.0501	48.1964	43.1284	46.2798	35.7814	49.7789	48.5978	43.5548	46.219	42.2405	48.9233	41.9693	51.1248	33.9822	45.3426	40.9529	46.8053	31.3574	33.9725	36.5729	38.7796	35.6477	40.5594	37.7826	29.6979
PTFE	43.6131	37.4434	44.0711	36.0207	39.7896	35.3981	33.3104	39.6501	40.8031	43.2723	39.3073	40.518	37.4121	37.669	44.4168	41.3878	44.1012	37.9562	40.4389	41.2639	33.97	41.118	40.4362	28.8614	39.2518	40.1796	37.2841	38.2379	28.5484	42.9967	41.4301	37.0659	38.68	35.1829	42.0836	35.2942	44.5639	26.6916	37.6682	34.4464	39.1352	23.2999	25.4303	29.709	32.2151	28.8744	33.2534	29.6996	23.0516
PVC-Com-2	48.6339	41.1696	48.5679	34.8294	43.5744	39.4017	37.6551	43.4612	45.2903	47.6061	43.228	45.3212	43.4365	43.5754	49.0206	45.6777	48.8298	41.7998	45.175	44.6477	37.9222	45.5494	44.1427	33.1461	43.3885	46.4592	40.7046	44.1375	32.8374	47.5701	46.0863	40.6947	44.2899	39.0742	46.545	39.0724	49.3839	32.0717	43.4077	38.1936	45.2879	30.2801	32.1192	34.3179	36.0622	33.0589	37.558	35.558	25.6041
PVC-Com-3	48.5138	41.0112	48.4379	34.7443	43.3904	39.2451	37.4737	43.1854	45.1142	47.4181	43.0725	45.0811	43.2106	43.3887	48.8522	45.6211	48.4458	41.5634	44.9807	44.5467	37.7035	45.3417	43.9812	32.9327	43.1516	46.3053	40.4311	43.9844	32.5916	47.3878	45.9239	40.4361	44.1622	38.8255	46.3249	38.9612	49.1567	31.7927	43.1294	37.8959	45.0565	29.966	31.8464	34.0642	35.8249	32.8454	37.2404	35.3078	25.363
PVC-Com-4	51.4645	44.2882	51.2024	37.3075	47.0385	42.7332	41.3038	46.6538	48.8864	49.925	46.3865	48.6703	46.3504	46.2851	51.8453	48.8268	51.6639	45.1282	48.5912	47.0564	41.32	48.1281	47.1858	36.7002	46.935	49.4931	42.9544	47.1328	36.1899	50.6153	49.2487	44.1797	47.0513	42.5294	49.8733	42.4254	51.8505	34.6122	45.838	41.5224	48.1998	32.0745	34.718	36.8041	38.9427	36.3505	40.9954	38.4927	29.7582
PVC-Com-5	45.1367	36.4171	44.0072	34.8668	39.4277	34.8684	32.6957	38.7416	41.3846	42.6106	38.1146	41.2503	37.2398	37.6045	44.9836	41.1455	44.5067	37.4752	41.4342	40.1761	33.9541	35.1544	39.7373	29.2262	39.5613	40.6867	31.6324	38.5917	28.8976	43.6119	41.9866	37.0902	38.4361	35.3584	43.1509	33.8855	45.3048	26.4771	37.9653	33.7751	38.7173	24.4414	26.2163	29.3567	30.5397	28.3096	33.0624	29.6965	25.2109
PVC-Com-6	50.5648	43.4415	50.7209	36.8771	45.8939	41.6393	39.8699	45.6647	47.6929	49.6867	45.4868	47.419	45.9764	46.3187	51.0502	47.9205	50.7302	44.0329	47.3999	47.1442	40.1928	48.2872	46.3555	35.5562	45.7819	49.0603	43.065	46.4539	35.0845	49.6325	48.444	42.9017	46.8592	41.3131	48.6788	41.3633	51.1987	34.4725	46.0851	40.6923	47.882	32.6819	34.6396	36.8993	38.676	35.822	39.9396	38.0575	27.9037
PVC-Com-7	43.3358	34.2812	41.7589	31.367	37.0176	32.7597	30.3351	36.7552	39.1077	40.1341	35.9443	39.2782	35.4773	35.942	42.7062	39.1618	42.1563	34.9177	39.3481	38.1133	31.8351	39.4279	37.3489	26.532	37.0956	38.7429	34.2186	36.5103	26.6249	41.5017	40.081	35.0962	36.449	33.4508	40.8642	31.9296	43.0757	24.5077	35.5612	31.6464	36.8818	22.401	24.1194	27.1145	28.8675	26.7845	30.9425	27.7617	22.5346
PVC-Com-8	47.9975	41.3011	48.3234	34.7815	43.7588	39.4711	37.6548	43.5588	45.4319	47.2848	43.0441	45.1583	44.0991	44.3596	48.703	45.6674	48.3396	41.7283	45.0581	44.6676	38.1046	46.1975	44.0069	33.3517	43.438	47.2301	40.6653	44.73	33.0955	47.3049	45.9389	40.6636	45.0346	39.0835	46.2043	39.0196	48.9006	32.4367	44.1362	38.3697	46.0097	30.3902	32.4691	34.8276	36.2608	33.6444	37.6597	35.933	25.9052
PE-Com-1	43.1004	38.1341	43.5366	39.4646	37.0742	36.0037	34.4105	39.5149	38.2752	42.6581	36.388	37.4344	12.994	11.3231	43.3999	40.2829	43.3873	40.2159	38.5809	34.3365	35.5516	40.623	41.1134	34.0418	37.7035	7.27172	37.5151	9.69472	34.1754	41.7338	40.2545	36.3046	11.2089	37.2629	41.3239	36.6205	43.5509	33.2811	14.0469	35.1411	12.2962	32.7932	26.377	35.7463	34.8683	33.0703	35.8197	20.7607	33.7516
PE-Com-2	43.5406	38.5855	43.7248	39.7855	37.3086	36.3489	34.7197	39.9982	38.6936	43.1692	36.7442	37.7049	12.9341	11.0837	43.6812	40.5183	43.7277	40.5254	39.0691	34.6151	35.8922	41.0784	41.5959	34.5197	38.2379	6.88947	37.9221	9.71668	34.5906	42.0533	40.598	36.5305	10.8467	37.6194	41.8474	36.8836	43.9667	33.5475	13.6626	35.4035	12.0581	33.0656	26.5403	36.1226	35.3426	33.3728	36.2994	20.9839	33.9199
PE-Com-3	44.2513	39.1868	44.3995	40.1776	37.8291	37.0949	35.4805	40.5281	39.3538	43.7221	37.4128	38.4981	13.6489	11.7302	44.3276	41.2188	44.3465	41.291	39.8589	35.0928	36.6898	41.5772	42.0896	35.1519	38.8585	7.6502	38.4123	10.7093	35.2118	42.6681	41.1169	37.0842	11.4596	38.4383	42.5079	37.5774	44.7023	34.247	13.91	36.0627	12.5243	33.7485	27.382	36.9623	35.7729	33.8801	36.979	21.6096	34.4893
PE-Com-4	44.1715	39.108	44.2281	39.7265	37.5496	36.7352	35.2116	40.3666	39.0154	43.4462	37.1069	38.2512	13.4305	11.7174	44.4605	41.0136	44.061	40.995	39.5772	34.8842	36.336	41.6751	41.6183	34.7473	38.3107	7.65	38.5206	10.4827	34.9508	42.6526	40.8351	36.8931	11.2279	37.9779	42.1696	37.3804	44.4251	34.0649	13.6631	35.9036	12.4761	33.2686	26.9799	36.6032	35.5414	33.7082	36.8477	21.2801	34.4753
PE-Com-5	38.6583	35.3271	39.9896	36.6995	33.2308	32.4713	31.1544	36.4517	34.4344	39.3998	33.096	33.0797	14.3824	13.6164	39.6481	37.3458	39.5216	36.5826	34.3084	30.6427	31.4347	36.4569	37.5572	30.5805	33.4596	10.7309	32.9128	10.8212	30.5452	37.8249	35.8855	31.9857	13.8656	33.1134	36.8812	33.7396	39.4924	30.7423	16.4061	31.2042	14.676	29.4517	24.8922	32.3451	31.3841	29.4362	32.1734	19.6109	31.0584
PE-Com-6	42.4434	38.5976	43.4601	39.6079	36.9381	35.86	34.6976	39.6818	38.0256	42.7395	36.5807	36.9241	14.7644	13.201	43.0497	40.7854	42.9236	40.0448	38.1035	34.1415	35.14	40.0989	40.8659	33.9901	37.0995	9.58098	36.9444	11.0948	34.0278	41.2729	39.624	35.8802	13.1384	36.6067	40.5657	37.1194	43.0891	34.0201	15.4177	34.7913	13.9428	32.7042	27.5657	35.9352	34.9592	33.0893	35.6073	21.9214	34.1116
PE-Com-7	43.0607	38.5867	43.6435	39.4862	37.036	36.3786	34.7922	39.9554	38.4307	42.9295	36.5152	37.5544	13.5681	11.9006	43.3935	40.3821	43.4257	40.5907	38.697	34.1569	35.9115	40.9373	41.3127	34.4728	37.9027	7.5767	37.6291	10.1397	34.4962	41.8398	40.1972	36.2845	11.6324	37.5872	41.3139	37.1313	43.6039	33.6933	14.1156	35.3554	12.8033	33.0763	26.9541	36.1745	35.1368	33.3001	36.2704	21.3126	33.8468
PE-Com-8	42.9408	37.9636	43.1207	39.1469	36.7139	35.5963	34.0129	39.1649	38.1065	42.3697	36.2273	37.1559	11.7874	10.14	43.0891	39.7758	42.8965	39.9149	38.3529	34.0134	35.0931	40.3519	40.8231	33.7059	37.5489	6.54401	37.0969	8.82418	33.767	41.2578	39.943	35.9179	10.1013	36.7627	41.1519	36.1602	43.1883	32.7351	13.4128	34.7092	11.1362	32.2858	25.7999	35.1514	34.4476	32.5832	35.5671	20.2142	33.2055
PET-Com-1	48.6464	41.1349	48.4164	35.5229	42.0197	38.9699	36.5705	43.5755	44.5622	46.5181	42.552	44.7315	39.626	39.6255	48.8934	45.4171	48.3179	41.0459	44.7273	43.4692	37.6796	43.524	43.8884	32.0766	42.5369	41.7706	39.0831	39.9362	32.1766	47.5406	45.8898	39.7937	39.9469	39.2535	46.6156	38.6443	49.1648	30.5946	38.8972	37.1912	40.6934	27.6545	29.6158	33.3282	34.5472	31.4555	36.7865	32.1386	21.7111
PET-Com-2	48.6644	41.1648	48.5361	35.7853	42.1628	39.0337	36.5864	43.6657	44.6201	46.5853	42.7724	44.7805	39.2533	39.2533	48.9761	45.5152	48.3742	41.0539	44.7936	43.5995	37.6584	43.4729	43.8978	32.0069	42.4861	41.4357	39.0395	39.5443	32.1764	47.6196	45.8837	39.828	39.615	39.2608	46.6292	38.714	49.1845	30.5924	38.5947	37.2295	40.3636	27.5065	29.3121	33.2627	34.537	31.4473	36.8124	31.9144	21.7089
PET-Com-3	51.6655	44.0422	51.0349	37.9483	44.8421	41.9635	39.5662	46.3436	47.308	49.4395	45.1936	47.5765	41.9461	42.1246	51.7924	47.9789	51.17	44.2979	47.7252	46.0806	40.9141	45.8246	46.9682	35.542	45.6383	44.0469	41.1274	42.5714	35.7073	50.3782	48.7961	42.9766	42.46	42.4432	49.7577	41.4535	52.2063	33.7879	41.5305	40.3642	42.8374	31.241	32.4746	36.6953	37.6996	34.91	40.1638	35.1882	24.9604
PET-Com-4	50.7304	42.8909	49.995	36.6169	43.803	40.7692	38.3282	45.1828	46.2496	48.3726	44.0792	46.523	40.7053	40.9695	50.8725	46.9363	50.1267	43.1795	46.6818	45.1608	39.683	45.0635	45.8017	34.3443	44.5431	42.8957	40.4382	41.4814	34.4427	49.3305	47.7893	41.8463	41.2618	41.255	48.7344	40.2428	51.1691	32.4637	40.5012	39.0663	41.6715	29.9796	31.3342	35.4	36.3136	33.6057	38.9686	33.9993	23.7556
PET-Com-5	49.6416	41.8522	49.0799	35.9966	42.8138	39.6892	37.2933	44.2682	45.2825	47.3126	43.1826	45.4934	39.3422	39.4379	49.8129	46.0867	49.1725	42.0948	45.6276	44.0187	38.518	44.0237	44.7619	33.207	43.5128	41.5223	39.4544	39.9696	33.3551	48.356	46.728	40.8071	39.8241	40.1277	47.6092	39.3619	50.1758	31.3722	38.9074	38.0051	40.2739	28.6339	29.8091	34.2522	35.1887	32.4774	37.7558	32.5442	22.6222
PET-Com-6	50.7878	43.219	50.3484	37.2137	44.1491	41.1565	38.7555	45.6195	46.5817	48.6711	44.4706	46.7885	41.2543	41.3516	51.0121	47.3897	50.4478	43.4775	46.8891	45.3883	39.9532	45.1875	46.1307	34.6303	44.8293	43.3701	40.5683	41.8031	34.7698	49.6469	48.0222	42.1422	41.761	41.5563	48.9192	40.7302	51.4306	32.9411	40.7877	39.4648	42.1579	30.2352	31.5621	35.7897	36.7627	33.9742	39.1573	34.2461	23.9568
PET-Com-7	49.0047	41.0513	48.3066	35.4991	42.0204	38.8186	36.4397	43.4047	44.5354	46.578	42.3856	44.7369	38.4118	38.4661	49.1096	45.2712	48.3634	41.2841	44.9143	43.3361	37.6814	43.4001	43.9276	32.3403	42.7882	40.5748	39.0303	39.0297	32.4453	47.5773	46.0057	40.016	38.8475	39.256	46.919	38.5204	49.4248	30.4381	37.9153	37.1026	39.445	27.7889	28.839	33.3392	34.3666	31.5539	36.9639	31.601	21.8514
PET-Com-8	49.8077	42.1413	49.3412	36.1701	43.0211	39.9685	37.5651	44.5159	45.5444	47.5476	43.4893	45.7861	40.3422	40.3619	49.9948	46.3302	49.3147	42.2276	45.8601	44.4085	38.7413	44.3379	44.945	33.2722	43.6781	42.4798	39.9039	40.7968	33.3444	48.5688	46.971	40.9784	40.7171	40.324	47.7749	39.6384	50.2978	31.6036	39.7435	38.2139	41.3432	28.829	30.5021	34.4485	35.5394	32.6158	37.9554	33.1189	22.7623
PET-Com-9	49.1793	41.6912	48.9906	35.9863	42.5372	39.5014	37.082	44.1233	45.0876	47.0489	43.1284	45.2968	40.3333	40.2946	49.4538	45.9626	48.8732	41.6028	45.2496	43.9879	38.1948	43.9712	44.3765	32.6409	43.0898	42.4491	39.5057	40.6029	32.7305	48.0793	46.4021	40.366	40.6313	39.7998	47.114	39.2424	49.7023	31.232	39.5896	37.73	41.3784	28.2937	30.2495	33.9201	35.117	32.0348	37.3367	32.7867	22.3098
PET-Com-10	49.8353	42.1644	49.3745	36.1999	43.0874	40.0126	37.7135	44.5693	45.6592	47.6353	43.5213	45.8067	40.6094	40.6039	50.0456	46.388	49.4092	42.3075	45.9348	44.4167	38.8104	44.4327	45.0054	33.3516	43.7565	42.722	40.0003	41.0183	33.4328	48.6477	46.971	41.0089	40.9729	40.3779	47.8358	39.6655	50.3526	31.6624	39.9918	38.2768	41.5885	28.9394	30.7254	34.5266	35.598	32.658	38.0271	33.2918	22.8425
PET-Com-11	51.163	43.3447	50.4237	37.0136	44.1885	41.2002	38.8121	45.6252	46.728	48.7861	44.5036	46.9728	41.0625	41.2834	51.2995	47.3298	50.5477	43.6442	47.1348	45.4644	40.1743	45.3498	46.2561	34.8335	45.0166	43.1842	40.7009	41.7879	34.9591	49.821	48.1843	42.2812	41.5701	41.74	49.1819	40.6892	51.6302	32.9069	40.775	39.5824	41.9397	30.4066	31.6638	35.8773	36.8727	34.0842	39.4257	34.3685	24.186
PET-Com-12	48.3739	40.701	48.1399	35.3451	41.6617	38.5143	36.2167	43.195	44.2283	46.1677	42.2749	44.4337	39.0071	39.0022	48.5995	45.0565	48.01	40.7098	44.4561	43.1889	37.3694	43.2152	43.4547	31.6527	42.1971	41.2128	38.8968	39.3052	31.8353	47.2859	45.5603	39.5402	39.3319	38.8218	46.2968	38.2826	48.8942	30.1373	38.3216	36.7679	40.1189	27.2503	29.0807	32.8951	34.1437	31.0911	36.489	31.6702	21.4878
PET-Com-13	48.8551	41.446	48.7309	35.9222	42.3368	39.273	36.8909	43.8896	44.8556	46.8034	42.8612	45.0963	40.0754	40.0461	49.1449	45.7677	48.6284	41.3218	44.9971	43.8048	37.9423	43.7625	44.1405	32.3748	42.8367	42.244	39.3865	40.3448	32.475	47.863	46.2107	40.1381	40.4176	39.5276	46.8519	39.0065	49.4854	31.007	39.3426	37.4883	41.1649	27.9775	29.9966	33.6678	34.8918	31.8356	37.0764	32.5225	22.0858
PP-Com-1	5.4602	14.8292	8.26139	34.8673	11.8577	15.2051	18.5215	12.5829	7.53287	10.6429	9.29275	7.11407	39.4908	39.5244	8.03415	8.99163	7.31962	16.1636	6.04846	11.9872	16.3338	14.8204	12.2066	24.8952	11.0669	40.6806	20.0214	38.9563	24.3118	6.66991	4.42761	12.6687	40.0948	14.9396	5.79759	17.7309	8.86325	27.4107	39.0696	16.7198	40.5414	29.1935	33.8607	23.6735	21.7476	23.3056	18.3444	34.2415	35.6958
PP-Com-2	5.92853	15.0041	7.93247	34.5643	12.1018	15.487	18.8327	12.864	8.39234	9.94263	9.82203	7.43302	39.4187	39.5657	8.20113	9.084	7.50411	16.471	6.64631	11.8955	16.659	15.1455	12.264	25.4402	11.6413	40.5724	20.3934	39.1993	24.7577	7.01348	4.26407	13.0547	40.2312	15.3992	6.77836	17.9087	8.83096	27.5231	39.3129	17.0366	40.6465	29.5719	34.0694	23.6915	21.913	23.3614	18.9205	34.5919	36.0691
PP-Com-3	7.44283	17.2358	9.30933	37.4949	14.233	18.2929	21.8717	15.1745	11.2672	11.7047	13.1773	9.63172	42.2323	42.3191	8.04483	11.4191	9.34778	18.0124	9.64339	14.5817	19.6901	16.4399	13.3932	28.2254	14.1443	43.4173	22.9391	41.7315	27.2283	6.83347	8.76809	15.2818	42.8477	17.9478	8.59059	20.6894	6.39295	30.2419	42.2039	19.9202	43.4075	32.3742	37.3467	26.0229	24.6958	26.2008	21.7283	37.6626	38.6265
PP-Com-4	7.83347	14.4342	10.2197	34.0412	10.362	14.7735	18.1863	12.8091	7.22272	11.5758	8.5919	5.11996	37.1488	37.2275	9.33262	9.73018	9.89787	16.0456	5.95642	9.92951	15.8398	13.9969	12.5526	24.6382	10.6343	38.2366	19.1699	36.5376	24.0237	7.34623	6.70885	11.4474	37.8247	15.0585	7.41697	17.5234	9.02483	27.0394	37.1436	16.2259	38.2355	28.7836	32.7047	23.034	20.9147	22.6776	18.0691	32.6533	35.1543
PP-Com-5	11.6431	12.2223	10.9997	30.9779	7.83154	11.7887	14.4149	10.7583	6.86914	10.8192	5.7101	5.84798	34.1144	34.4005	11.0805	8.26099	10.6119	13.5924	6.48242	7.40283	13.2596	14.53	10.7306	21.3568	8.02321	35.2012	16.9994	33.9461	21.2343	9.49263	7.76897	9.65309	34.8044	13.6935	9.56829	14.3081	11.364	23.4439	33.8498	13.0181	34.9361	26.2136	29.5902	19.9733	17.7218	19.4571	15.6816	29.4066	32.7144
PP-Com-6	7.93458	13.4323	7.52975	34.6657	10.1519	13.9375	17.1717	11.1221	6.0904	9.9671	8.92823	6.58284	38.1821	38.4844	6.91518	8.56673	6.75314	14.3083	6.07044	11.8666	15.3088	15.4718	10.7764	23.5994	10.1982	39.5531	19.7572	37.8407	22.9175	6.10505	6.57318	11.8012	38.8898	13.8003	6.11097	16.2915	7.57087	26.2838	37.4692	15.7966	39.1408	28.1629	32.627	22.3269	20.4036	22.4322	17.1121	32.9227	35.5561
PP-Com-7	6.87998	14.1942	8.55145	33.8522	10.7118	14.2405	17.3722	12.133	6.11626	10.3914	8.1596	6.34397	38.2162	38.1953	8.45631	9.04565	7.55488	15.6319	5.3558	11.2165	15.5862	15.0884	11.768	23.8268	10.2578	39.1401	19.1025	37.8157	23.3202	7.24548	4.33412	11.9147	38.7465	14.2217	5.88549	16.8661	9.70492	26.5182	37.6751	15.841	39.2072	28.3351	32.7609	22.9461	20.5627	22.4504	17.4688	32.9435	35.0594
Inconnu	43.1915	35.2748	42.3907	31.6481	36.5893	33.104	29.627	37.5374	38.5177	41.0029	36.7894	39.1957	34.7395	35.1219	43.0924	39.8944	41.9395	33.9923	39.0059	38.2483	31.9451	40.2345	37.7619	25.4941	35.9928	36.6344	34.9477	34.7322	26.132	41.6826	40.2785	34.6544	35.27	33.5045	40.5885	32.2577	43.5016	26.452	33.505	31.4322	35.7276	24.2888	24.9245	28.7943	29.1101	26.2152	30.4169	26.5012	25.2645
PP-Com-8	12.5135	21.4403	13.7466	41.7807	18.458	22.7745	26.1968	19.8661	15.9852	15.7752	18.1812	14.8755	46.2115	46.2436	11.9417	17.0141	14.0724	21.9334	15.2132	19.3711	24.0759	21.057	17.6459	31.963	18.568	47.4302	27.501	45.7639	31.2486	12.8825	14.7268	19.7087	46.948	22.3667	13.7159	25.1858	11.7979	34.4777	45.8939	24.1483	47.3083	36.153	41.2897	30.0981	28.6824	30.5126	25.2238	41.5821	42.3038
PP-Com-9	8.71315	17.7064	10.6665	38.3497	14.997	19.1378	22.6235	16.132	12.5323	12.7817	13.9981	10.8219	42.196	42.4305	9.01336	12.6247	11.0356	19.0483	11.2101	15.1989	20.7769	17.5774	14.6908	29.0192	15.4899	43.5701	24.1501	42.0366	28.1948	8.77675	10.7578	16.4159	42.8469	19.1094	10.4154	21.179	7.97156	30.5722	42.4042	20.8408	43.249	33.0995	37.8406	26.8271	25.5229	27.0792	22.2639	38.0775	39.6574
PP-Com-10	13.4829	20.9771	12.928	41.4856	18.8197	22.5037	26.0131	18.6455	16.3635	14.7347	17.8828	15.1364	45.9261	46.3743	11.8752	15.2085	13.7087	22.1936	15.586	19.4864	24.5574	21.4646	17.4328	32.7126	19.2774	47.2195	28.3739	46.3237	31.8159	12.4209	14.8477	20.4146	46.787	22.9343	14.731	23.7977	10.7758	33.4865	46.3496	24.3679	46.8103	37.0456	41.6974	29.9315	28.8848	30.5737	26.1163	41.9292	43.7028
PP-Com-11	7.13221	16.7896	9.4153	36.8325	13.8414	17.779	21.3203	15.0482	10.814	11.6172	12.7825	8.83939	41.3189	41.3289	8.03097	11.5193	9.6741	17.593	9.10753	14.0203	18.9872	15.8171	13.1934	27.4223	13.5852	42.5522	22.1157	40.8899	26.5643	7.11561	8.73257	14.8257	41.9867	17.5879	8.66644	20.2245	6.34701	29.5137	41.1398	19.3764	42.3819	31.5102	36.3831	25.4823	23.9373	25.5521	20.8043	36.6231	37.9712
PP-Com-12	5.02529	15.8317	6.83411	36.3474	13.5101	17.0032	20.6641	13.7769	9.77624	9.86661	11.9947	9.21125	41.7183	41.8051	6.34803	9.62919	6.80755	16.9164	8.40072	14.029	18.2014	16.3818	12.1795	26.8984	13.1694	43.0109	22.0903	41.2308	26.0032	5.70254	6.38609	14.504	42.3008	16.4851	6.73207	19.2916	6.51199	29.0247	41.4375	18.6337	42.7833	31.1271	36.0686	25.0154	23.3806	25.0597	20.4141	36.4701	37.5123
PS-Com-1	63.2124	54.1474	61.4658	45.5553	57.0005	52.9875	50.6172	56.5012	58.8365	60.1569	56.1111	59.1347	55.0596	56.0764	62.8813	58.2786	62.1739	55.1334	59.2513	57.6271	52.1863	60.9864	57.5198	47.5602	56.7794	57.414	54.0811	56.5163	47.4648	61.1964	60.5031	55.4413	56.041	53.672	60.9013	51.8977	62.5904	45.3845	55.1512	52.3097	56.5836	44.5067	45.6163	48.1045	50.4875	48.1255	51.6784	48.7435	45.8932
PS-Com-2	55.8694	46.627	54.1303	38.4604	49.7726	45.4197	43.2618	48.9256	51.7737	52.7636	48.9579	51.9475	47.2961	48.1344	55.5589	50.7111	54.6863	47.7622	52.0783	50.3248	44.9393	52.8985	50.3915	40.1306	50.0768	49.6847	46.9025	49.0371	39.982	53.895	53.0321	47.9333	48.4868	45.9978	53.8314	44.0006	55.4437	37.462	47.3618	44.7926	48.5257	37.2102	38.5167	40.657	42.8903	40.5109	44.0846	41.3643	38.6534
PS-Com-3	56.8003	47.1126	54.866	39.1392	50.3729	45.911	43.6428	49.4485	52.3836	53.2574	49.8088	52.6247	48.3398	49.2697	56.2572	51.2544	55.2822	48.2046	52.7223	51.1126	45.461	54.0611	50.6264	40.7168	50.5585	50.4471	47.8858	49.8378	40.7083	54.6688	53.8999	48.7493	49.3607	46.5766	54.4265	44.7458	56.0258	38.1765	48.0134	45.4649	49.5622	37.9216	39.2668	41.0897	43.4283	41.3766	44.9719	42.3379	39.6641
PS-Com-4	62.4052	53.7408	60.474	44.5583	56.3502	52.5299	50.5274	55.9589	58.2009	59.1468	55.6896	58.3991	54.7362	55.8106	61.7881	57.7925	61.1118	54.5727	58.6014	56.8376	51.9114	60.9176	56.6045	47.9799	56.172	56.5367	53.8313	55.765	47.8958	60.4784	59.6968	54.867	55.3931	53.2045	60.0661	51.7143	61.8107	46.3905	54.2476	52.0105	56.0242	45.8293	46.9377	49.0636	49.8672	48.3833	51.474	48.7699	47.3324
PS-Com-5	65.0235	56.7653	63.2845	48.8765	59.3067	55.5258	53.5445	58.9387	61.133	61.9244	58.6798	61.2102	57.8155	58.7848	64.6066	60.5648	63.8683	57.7391	61.2693	59.818	54.9065	63.9487	59.6445	51.1312	59.2448	59.9332	56.959	59.0403	50.9895	63.1696	62.4925	57.9518	58.6824	56.1026	62.8214	54.8478	64.3372	49.2308	57.5371	54.9783	59.1971	48.7482	49.57	51.7924	53.1568	51.3232	54.652	51.9716	50.8009
PS-Com-6	61.6565	53.0413	60.0781	44.9215	55.9413	51.7501	49.7782	55.3325	57.7928	58.7959	55.1908	58.0603	53.9783	54.8309	61.3499	57.0678	60.7088	53.8612	58.1287	56.575	51.2057	59.5435	56.4388	46.9911	56.1104	56.2768	53.3832	55.4913	46.818	59.9398	59.1023	54.2175	54.9991	52.4418	59.7906	50.6699	61.3092	44.6034	53.552	51.214	55.2249	44.1799	45.2386	47.2552	49.502	47.4007	50.6538	48.2201	45.7769
PS-Com-7	63.1318	54.5022	61.379	44.7912	57.0562	53.2216	51.1662	56.6253	59.0669	60.0847	56.264	59.1835	54.9838	56.0187	62.6553	58.319	62.0381	55.528	59.309	57.3897	52.5835	61.455	57.4162	48.6704	57.0728	56.7698	54.5436	56.1294	48.5879	61.2757	60.426	55.4193	55.7648	53.9644	60.9246	52.3328	62.584	46.825	54.7993	52.6696	56.2521	46.3587	47.2654	49.6141	50.5495	48.8034	52.3394	49.2279	47.2759
PS-Com-8	61.0529	52.305	59.3913	44.4204	55.4351	51.0774	49.2148	54.6551	57.311	57.9904	54.6213	57.3501	53.637	54.5181	60.7826	56.5301	60.1573	53.2383	57.5044	56.0776	50.538	59.1031	55.5739	46.2489	55.4095	55.9331	52.8715	55.1757	46.1308	59.4061	58.4707	53.7108	54.538	51.7353	59.1223	50.3152	60.6661	43.9368	53.1895	50.6537	54.9701	43.5302	44.6624	46.5992	48.8211	46.7815	49.91	47.7831	45.2654
PS-Com-9	61.3582	52.5274	59.7122	44.5992	55.6229	51.3536	49.4218	54.9068	57.5091	58.2389	54.8792	57.6195	53.8158	54.778	60.9563	56.7731	60.3743	53.4881	57.7199	56.2913	50.8146	59.3518	55.8566	46.5055	55.6414	56.1658	53.0902	55.2967	46.4009	59.6541	58.7281	53.8939	54.8021	51.9746	59.3239	50.5613	60.861	44.2743	53.4321	50.891	55.132	43.8216	44.9406	46.8833	49.0597	46.9768	50.2701	47.9467	45.5297
PS-Com-10	57.1944	47.3961	55.3842	39.2204	51.1466	46.4144	44.2881	49.8096	53.0293	53.7963	50.2677	53.0763	48.7876	49.4772	56.739	51.8383	55.9847	48.904	53.3346	51.3337	45.9298	52.1292	51.1083	41.1745	51.1298	51.0559	46.3203	50.4669	41.0783	55.1506	54.2093	49.1267	49.8867	47.0802	55.0967	45.1334	56.6769	38.3793	48.6542	46.0126	49.9234	38.3507	39.7045	41.2861	42.8652	41.0977	44.9682	42.2874	40.3091
PS-Com-11	60.8166	51.344	58.8424	43.1536	54.6325	50.0994	48.1404	53.5451	56.7242	57.2036	54.0368	56.8451	52.9222	53.6899	60.1761	55.5283	59.4689	52.3049	57.042	55.3563	49.6283	58.4503	54.7481	45.117	54.7979	55.1108	52.2234	54.3167	45.128	58.9038	58.0296	52.8468	53.6421	50.8303	58.6858	48.9887	60.2151	42.5768	52.2905	49.5875	54.035	42.3701	43.751	45.2518	47.798	45.6299	49.0727	46.9065	44.0552
LY-01	41.5395	37.849	42.9971	39.1027	36.2862	35.4992	33.9276	39.2635	37.5374	42.2461	35.8951	36.513	14.9164	13.4282	42.2792	40.3682	42.6262	39.3565	37.5188	33.6537	34.5772	39.5203	40.6412	33.1988	36.6375	9.68865	36.2648	11.0128	33.3369	41.1072	39.287	35.1613	13.2701	36.3259	40.0368	36.3918	42.7728	33.1446	15.965	34.1832	14.3967	31.9806	26.8404	35.3556	34.3664	32.3914	34.3462	21.2644	33.2008
LY-02	44.6407	38.6033	44.4145	40.0793	37.6403	36.8028	34.7936	39.9781	39.3105	43.3414	37.2267	38.7148	12.8029	11.3546	44.3367	41.0834	44.4674	40.6831	39.9334	35.5048	36.3334	41.9564	41.8421	34.3261	38.5042	8.2924	38.2705	9.93946	34.4089	43.084	41.7	37.0701	11.2159	38.1941	42.6923	36.6789	45.0649	33.3595	15.4997	35.5404	11.3161	33.0322	26.569	36.2513	35.2984	33.2777	36.1213	20.6737	34.1726
LY-03	60.8228	51.8312	59.0255	43.7152	54.5525	50.566	48.593	54.095	56.7184	57.6636	54.0983	57.0608	53.1373	53.9657	60.2835	56.1187	59.7091	52.6396	57.0417	55.2917	50.0309	59.0575	55.0604	45.4164	54.7052	55.4732	52.3869	54.5396	45.3369	58.9444	58.1266	52.8513	53.9046	51.2603	58.5961	49.6938	60.3928	43.3544	52.5015	49.8627	54.2688	42.6907	44.1285	46.1812	48.3353	45.8302	49.3731	46.9967	44.2093
LY-04	19.0912	10.4535	17.0835	26.0114	12.5926	9.38293	9.61872	11.3336	14.5353	15.8603	12.4565	15.3674	32.1919	32.8809	18.2962	13.8648	17.4205	11.9074	14.6666	16.9198	9.95528	18.9194	13.1263	15.8719	13.0165	34.6285	16.9731	32.7357	15.1653	16.8078	16.0729	9.80469	32.6868	9.78827	16.1368	8.73037	18.4956	17.4453	31.6278	8.93175	33.1902	20.5994	25.4564	14.6625	13.4504	13.5616	10.493	26.1361	27.0541
LY-05	38.5712	35.118	39.8087	36.7196	33.3596	32.5237	31.2524	36.284	34.4287	39.2135	32.9038	33.3718	13.0531	11.999	39.2961	37.208	39.4503	36.5325	34.4545	30.5822	31.6178	36.635	37.6964	30.3818	33.6137	9.34772	33.4585	9.46325	30.4914	37.7952	36.0716	32.2107	12.1541	33.3409	37.0534	33.6238	39.589	30.394	15.5871	31.3238	13.0624	29.255	24.6648	32.366	31.4703	29.424	31.9651	19.1889	31.1999
LY-06	48.6544	40.9102	48.2415	35.4201	41.8475	38.6734	36.3372	43.3213	44.4336	46.3035	42.3636	44.7127	39.2675	39.3787	48.7912	45.2094	48.2099	40.8963	44.7481	43.3716	37.4971	43.611	43.6664	31.8831	42.4526	41.4803	39.2579	39.7422	31.9897	47.4979	45.8773	39.7418	39.5868	39.0791	46.6767	38.3562	49.1147	30.2467	38.5944	36.9986	40.3451	27.4566	29.34	33.1097	34.3481	31.3157	36.5884	31.9083	21.77
LY-07	44.0396	37.5121	42.8101	39.1135	35.6683	35.1123	32.702	38.9367	38.1058	41.8994	36.8231	38.1688	11.3903	10.0286	43.1796	40.5381	42.9996	37.8607	39.234	35.0454	34.5259	41.9583	40.0367	31.7942	36.6528	8.53954	37.8454	9.51166	31.8568	41.9363	40.9862	35.2478	9.08888	36.2511	41.3835	34.9278	43.8974	31.8099	10.7893	33.411	10.2242	30.7379	24.4267	34.602	33.3926	31.2634	33.6679	18.4919	32.7477
LY-08	34.517	24.5307	32.2791	24.7797	26.6886	21.5127	19.3756	26.5472	29.2842	30.7537	28.1192	30.3901	24.3954	25.2053	33.6577	29.9241	32.7253	23.4187	29.8208	30.7635	20.3521	32.5388	26.9066	13.7694	26.5406	29.5913	27.0379	25.797	13.0289	32.0256	31.59	23.7964	25.5248	21.4343	31.2478	21.1962	33.3123	11.8606	24.3341	19.9611	26.4526	8.49301	11.5736	15.4476	18.4928	14.0501	19.3766	15.5791	11.7423
LY-09	45.4618	37.3486	43.9518	35.3332	39.3946	35.0393	31.7284	39.2771	40.4973	42.9044	39.0782	41.581	35.9793	36.3736	45.1275	41.6366	43.3651	35.68	41.3487	40.9147	34.0704	41.6036	39.8475	27.2376	38.6927	38.218	36.7659	36.4901	27.4991	43.7073	42.4852	37.6783	36.5582	35.4418	43.2158	33.8813	45.6472	26.3431	34.9307	34.1526	37.2746	23.7043	24.9258	29.9563	31.7114	29.2804	32.6234	27.9688	24.7495
MAG-01	33.1264	25.0554	31.1133	26.1903	27.3112	22.7	19.4793	26.7498	28.499	30.7246	27.481	29.5982	28.3486	28.5783	32.4872	29.3219	31.2088	23.3663	29.167	30.0677	21.5423	31.0484	27.6673	15.0488	26.5029	30.6397	26.0791	29.0501	14.7703	31.2307	30.6178	25.0995	29.2242	23.0098	30.6533	21.536	33.1165	13.755	27.1227	21.6798	29.5937	11.1653	16.2523	17.1599	19.739	16.5984	19.7171	19.8612	16.0564
MAG-02	42.3042	34.2251	40.9654	29.9865	35.0009	31.762	28.7872	36.3536	37.3019	39.7141	35.7723	38.12	32.6268	32.9115	42.0349	38.4076	41.095	33.1549	38.1357	37.3423	30.6693	38.3272	36.8814	24.1616	35.4539	35.1676	33.5195	33.3617	24.2664	40.6049	39.15	32.9406	33.3281	32.1112	39.8597	30.9721	42.5129	23.0014	31.6219	29.8965	33.7406	19.8673	21.2954	26.1783	27.3515	24.3509	29.2034	24.4578	16.9814
MAG-04	36.7486	26.2499	34.0294	26.5933	28.6493	22.6881	20.5195	28.1388	30.7409	32.3473	29.64	31.6828	19.8775	21.015	35.6815	32.2656	34.7283	25.4742	31.5312	31.105	21.4023	34.1422	29.0294	15.7093	27.7176	26.0522	28.9069	21.9952	15.1086	33.9908	33.6285	26.088	21.3818	23.2332	33.5237	22.9946	35.5343	13.9457	19.666	21.3882	22.2947	11.3099	6.08228	17.5105	18.9425	16.217	20.4279	11.1054	17.8486
MAG-05	56.8644	46.195	54.8168	38.4041	50.0926	44.1641	42.4704	48.4823	52.2836	52.6181	49.6822	52.5734	46.2925	47.5652	56.2069	51.4928	55.422	46.7366	52.5344	51.1123	43.477	54.629	49.6586	38.2051	49.5409	50.2298	47.314	48.0516	37.9542	54.5953	53.9909	47.842	47.5518	44.7601	54.2063	43.5177	55.7867	35.451	46.2616	43.6606	48.1434	34.452	35.8471	38.8758	41.7161	39.089	42.9486	39.5092	37.416
MU-01	40.0945	35.7324	40.6352	37.2614	33.8037	33.0068	31.5203	36.7394	35.1051	39.9543	33.4972	34.2378	11.2418	10.5564	40.3988	37.8072	40.3875	37.3323	35.3353	31.3108	32.2851	37.9459	38.2945	30.9964	34.4778	7.74385	34.2855	8.06527	30.9281	38.7056	36.9688	33.0046	10.3882	34.074	38.2134	33.9237	40.5686	30.4882	14.7855	31.7273	10.964	29.3699	24.0264	32.8666	31.8575	29.6811	32.9238	18.5408	31.0462
MU-02	12.7252	9.20679	11.7425	30.0606	7.61743	8.37351	11.5648	8.12787	7.44143	10.4021	7.38373	7.98986	33.3212	33.8877	11.822	9.45631	11.6197	9.9369	6.92375	11.1738	9.44815	15.2615	8.43766	17.8344	6.18799	35.8928	15.9789	33.5246	17.5411	10.048	9.64474	6.76693	34.115	9.32529	9.25289	11.2695	11.4473	20.7063	32.7236	9.92909	34.4833	22.5112	27.0721	16.8101	14.8486	16.3829	11.3026	27.6021	30.9244
MU-03	29.2912	21.4557	27.1797	24.0386	23.628	19.1265	15.9434	23.0892	24.591	27.0219	23.6588	25.6877	29.3777	29.6431	28.6738	25.3678	27.2848	19.7624	25.4926	26.4632	18.3604	27.0712	24.0291	12.5225	23.1292	31.0397	22.6357	29.6746	11.9572	27.3487	26.6973	21.5913	30.055	19.6124	27.0353	17.8279	29.3892	11.4317	27.8894	18.4563	30.4848	12.2449	17.9734	14.2266	16.5411	13.9988	16.5267	21.1365	19.04
MU-04	64.5558	56.1967	62.9851	47.6386	59.0894	55.0767	53.0183	58.4233	60.6978	61.8248	58.113	60.8812	57.002	58.0674	64.1101	59.9737	63.542	57.4147	61.0081	59.4913	54.443	63.1982	59.4267	50.3549	59.0565	59.4361	56.3983	58.3993	50.2418	62.7582	62.1593	57.6239	58.0757	55.7148	62.5046	54.2942	64.1494	48.2623	56.9313	54.6162	58.5502	47.6474	48.5404	50.9602	52.676	50.4943	54.1625	51.2223	49.5467
MU-05	25.7485	18.8252	24.3164	24.3944	20.704	16.7092	14.1324	20.4132	21.4139	24.1064	20.7204	22.4849	32.1841	32.4021	25.4253	22.5908	24.1565	16.9624	21.9809	23.5903	16.0393	24.2301	21.0984	11.7862	19.7946	33.856	19.7117	32.3707	11.6384	24.0181	23.3812	18.6834	32.9694	17.0194	23.379	15.7588	26.0789	13.9084	30.5169	16.157	33.321	15.3457	21.2479	13.0287	14.7971	13.004	14.1929	23.7936	22.4857
MU-06	45.9788	35.1887	43.6469	27.6371	38.4256	33.0023	30.5885	37.5438	41.0423	41.7247	38.2315	41.7374	34.4406	35.6368	45.2158	40.2067	44.1532	35.2709	41.5425	40.3265	32.2296	42.7502	38.4368	25.9925	38.4438	37.8871	36.1197	36.2847	25.8471	43.6011	42.8226	36.322	35.2116	33.5994	43.2627	31.7869	45.0272	22.8675	33.8232	31.8603	35.8314	21.4059	23.744	26.503	29.5669	26.4824	31.1809	27.4824	22.7246
MU-07	47.5891	36.8401	45.7504	30.2935	41.0248	35.0102	32.7283	39.5858	43.0844	43.6566	40.4584	43.5852	36.0507	37.3657	47.1423	42.3732	46.2562	37.6912	43.311	42.2938	34.274	44.4588	40.744	28.4099	40.6265	39.7865	37.961	37.9763	28.1546	45.526	44.8465	38.6314	37.0032	35.7574	45.246	34.1372	46.7067	25.0636	35.6651	34.4844	37.7527	23.5475	25.8306	28.5846	31.9695	29.049	33.4214	29.7652	25.9181
MU-08	38.4962	33.9905	38.9555	35.5905	32.0318	31.1292	29.5586	35.066	33.4493	38.0561	31.6108	32.5813	12.3431	12.1346	38.7126	36.3342	38.757	35.3693	33.6623	29.4624	30.4202	36.2909	36.559	28.8506	32.5138	9.60975	32.3969	9.51928	28.9673	37.315	35.2351	31.2032	12.159	32.3695	36.5964	32.0655	38.9096	28.5679	15.2893	29.8942	12.5473	27.6533	22.6368	30.9032	29.977	27.8274	30.8549	17.0484	29.6584
MU-09	47.762	38.4575	46.1945	29.1044	41.0316	36.8989	34.4116	40.9002	43.4728	44.7172	40.9914	43.7966	38.5579	39.1964	47.1682	42.9046	46.5063	39.0149	43.6645	42.3223	36.1171	44.9419	41.6043	30.5097	41.5026	41.0003	37.645	39.6169	30.2291	45.7263	45.0053	39.0208	39.4198	37.1508	45.2147	35.863	47.2713	27.9943	38.2004	35.7725	39.8945	26.295	28.7284	31.198	34.1509	30.5423	35.2789	31.9411	26.7749
[truncated: 99 more columns]

## Sheet: CosineFurthestNeighbor
	LB-1	LB-2	LB-4	LB-5	LB-6	LB-7	LB-8	LB-9	LB-10	LB-11	LB-12	LB-13	LB-14	LB-15	LB-17	LB-20	LB-21	LB-22	LB-23	LB-24	LB-25	LB-26	LB-27	LB-28	LB-29	LB-30	LB-31	LB-32	LB-35	LB-36	LB-37	LB-38	LB-39	LB-40	LB-41	LB-42	LB-43	LB-44	LB-45	LB-46	LB-48	LB-49	LB-50	LB-51	LB-52	LB-53	LB-54	LB-55	LB-56
LB-1	0	0.02369	0.0074	0.56554	0.04533	0.03433	0.0515	0.01707	0.02084	0.02186	0.02749	0.02615	0.89041	0.88707	0.00847	0.00867	0.00561	0.03991	0.01431	0.0799	0.04283	0.11447	0.02085	0.11716	0.03623	0.87671	0.18913	0.88705	0.09204	0.00638	0.0081	0.03696	0.8872	0.02529	0.005	0.03053	0.01186	0.14937	0.87162	0.05645	0.88369	0.29304	0.87874	0.11703	0.10321	0.11805	0.04626	0.86403	0.8877
LB-2	0.02369	0	0.01451	0.53494	0.03784	0.01346	0.02349	0.00889	0.02314	0.01554	0.02719	0.03071	0.86491	0.86707	0.01502	0.01255	0.0174	0.01766	0.02128	0.07719	0.0232	0.11147	0.00917	0.06594	0.03057	0.859	0.17011	0.8646	0.04744	0.01645	0.02122	0.03062	0.86377	0.01448	0.01868	0.01038	0.01657	0.08259	0.84572	0.03466	0.86284	0.20241	0.81304	0.05855	0.05983	0.07391	0.01931	0.82062	0.86297
LB-4	0.0074	0.01451	0	0.54991	0.03842	0.02555	0.03778	0.01175	0.0193	0.00771	0.02618	0.02695	0.89469	0.89305	0.00322	0.00765	0.00299	0.02052	0.01637	0.0764	0.03504	0.11735	0.00972	0.09532	0.02998	0.88254	0.18726	0.89214	0.07736	0.00746	0.00996	0.03607	0.89226	0.02449	0.00939	0.02117	0.00879	0.12706	0.87442	0.04611	0.88876	0.2587	0.86936	0.08573	0.08477	0.10395	0.03346	0.86338	0.88281
LB-5	0.56554	0.53494	0.54991	0	0.50114	0.52557	0.50667	0.54106	0.53192	0.52997	0.50257	0.51953	0.79114	0.78821	0.54822	0.54268	0.55413	0.5368	0.53323	0.444	0.52019	0.60284	0.52466	0.49969	0.51089	0.74874	0.46934	0.76412	0.51557	0.54443	0.53649	0.50142	0.76907	0.54357	0.54567	0.51739	0.54961	0.56459	0.73827	0.4965	0.79696	0.56476	0.77662	0.52751	0.48695	0.48906	0.53524	0.7318	0.48535
LB-6	0.04533	0.03784	0.03842	0.50114	0	0.01863	0.01753	0.03698	0.01081	0.03024	0.00922	0.00911	0.71998	0.72774	0.03024	0.03466	0.03456	0.04228	0.01501	0.02214	0.02138	0.13307	0.03358	0.06845	0.00616	0.69464	0.15792	0.70246	0.07475	0.03274	0.02399	0.0063	0.71388	0.04183	0.02891	0.033	0.03747	0.13633	0.71424	0.01116	0.72039	0.22695	0.71102	0.09786	0.04881	0.04669	0.03091	0.67529	0.83498
LB-7	0.03433	0.01346	0.02555	0.52557	0.01863	0	0.00664	0.01344	0.01265	0.02083	0.01564	0.01777	0.78355	0.78906	0.02312	0.02115	0.02392	0.01934	0.01421	0.05193	0.00476	0.12684	0.01414	0.03742	0.01197	0.77504	0.167	0.77715	0.02933	0.0231	0.02141	0.01391	0.78235	0.0106	0.02064	0.01006	0.02536	0.07145	0.76988	0.01233	0.7856	0.16283	0.72592	0.0544	0.03862	0.04343	0.00783	0.73099	0.8454
LB-8	0.0515	0.02349	0.03778	0.50667	0.01753	0.00664	0	0.02453	0.01764	0.02779	0.01823	0.02352	0.74409	0.75193	0.03512	0.03313	0.03551	0.02483	0.02252	0.04549	0.00934	0.13991	0.02404	0.03164	0.0131	0.73224	0.1711	0.73576	0.03275	0.03675	0.03181	0.01848	0.74216	0.02455	0.03446	0.01585	0.03963	0.07735	0.73045	0.01179	0.74623	0.16068	0.68845	0.05957	0.03502	0.04013	0.01185	0.68775	0.83732
LB-9	0.01707	0.00889	0.01175	0.54106	0.03698	0.01344	0.02453	0	0.01783	0.01802	0.02328	0.02623	0.86008	0.86002	0.01346	0.00821	0.01181	0.02108	0.0158	0.07744	0.02153	0.11784	0.01019	0.06991	0.02844	0.85324	0.1794	0.85939	0.04719	0.01181	0.01492	0.02864	0.85892	0.00934	0.01183	0.0099	0.01697	0.08711	0.84067	0.03581	0.85659	0.21429	0.8139	0.0722	0.06914	0.08058	0.02172	0.81794	0.85927
LB-10	0.02084	0.02314	0.0193	0.53192	0.01081	0.01265	0.01764	0.01783	0	0.02236	0.00486	0.00521	0.77948	0.78141	0.0145	0.01592	0.01586	0.03326	0.00351	0.03716	0.01806	0.1211	0.02188	0.07601	0.00801	0.75742	0.16278	0.76695	0.06788	0.01526	0.00885	0.01175	0.77505	0.02377	0.01089	0.02098	0.02221	0.12959	0.76692	0.02327	0.77701	0.24509	0.77062	0.10165	0.06371	0.07202	0.02565	0.74296	0.86778
LB-11	0.02186	0.01554	0.00771	0.52997	0.03024	0.02083	0.02779	0.01802	0.02236	0	0.02566	0.02682	0.85342	0.8556	0.00916	0.01628	0.01129	0.01535	0.01972	0.06154	0.02684	0.12427	0.00853	0.074	0.02214	0.84157	0.18157	0.84834	0.06905	0.01595	0.01585	0.03099	0.85114	0.03008	0.01924	0.02193	0.01313	0.11536	0.83613	0.0318	0.85027	0.22227	0.81838	0.06221	0.06288	0.07962	0.02745	0.81551	0.87271
LB-12	0.02749	0.02719	0.02618	0.50257	0.00922	0.01564	0.01823	0.02328	0.00486	0.02566	0	0.00467	0.75063	0.75386	0.02133	0.01956	0.0228	0.04222	0.00574	0.02611	0.01938	0.12019	0.02814	0.07671	0.00882	0.72634	0.15256	0.73629	0.07199	0.021	0.00994	0.00927	0.746	0.02983	0.01619	0.0241	0.0287	0.13419	0.74298	0.02115	0.74927	0.24679	0.74746	0.10736	0.06132	0.06654	0.03223	0.71215	0.84247
LB-13	0.02615	0.03071	0.02695	0.51953	0.00911	0.01777	0.02352	0.02623	0.00521	0.02682	0.00467	0	0.74554	0.74863	0.02011	0.02085	0.0233	0.04235	0.00425	0.02558	0.02222	0.11453	0.02771	0.08405	0.00845	0.72128	0.15285	0.73004	0.07949	0.01693	0.01032	0.00807	0.74153	0.03229	0.01537	0.03022	0.02319	0.1432	0.74069	0.02368	0.74489	0.25595	0.74875	0.10884	0.06225	0.06867	0.03494	0.71031	0.86544
LB-14	0.89041	0.86491	0.89469	0.79114	0.71998	0.78355	0.74409	0.86008	0.77948	0.85342	0.75063	0.74554	0	0.0069	0.88018	0.86421	0.88542	0.87547	0.79006	0.61091	0.77029	0.84822	0.87303	0.74503	0.73778	0.0182	0.76716	0.01107	0.8125	0.85883	0.82137	0.73596	0.00547	0.84636	0.85463	0.83664	0.87655	0.84514	0.05437	0.71207	0.00451	0.76144	0.07515	0.85239	0.69457	0.67149	0.80508	0.02045	0.96759
LB-15	0.88707	0.86707	0.89305	0.78821	0.72774	0.78906	0.75193	0.86002	0.78141	0.8556	0.75386	0.74863	0.0069	0	0.8795	0.86382	0.88447	0.87836	0.79134	0.61531	0.77678	0.8488	0.87485	0.75766	0.74469	0.01671	0.77445	0.01325	0.82107	0.85764	0.82024	0.74285	0.00515	0.84865	0.85481	0.84045	0.87589	0.85545	0.03899	0.72151	0.00747	0.7798	0.08921	0.86	0.70566	0.68814	0.81081	0.03019	0.95013
LB-17	0.00847	0.01502	0.00322	0.54822	0.03024	0.02312	0.03512	0.01346	0.0145	0.00916	0.02133	0.02011	0.88018	0.8795	0	0.00858	0.00425	0.02031	0.01308	0.06747	0.03367	0.11	0.00931	0.09701	0.02534	0.86519	0.17952	0.87516	0.08087	0.00578	0.00961	0.02892	0.8768	0.02603	0.00856	0.02232	0.00624	0.13328	0.86217	0.04204	0.87492	0.26382	0.8633	0.08728	0.07952	0.09836	0.03105	0.84984	0.88587
LB-20	0.00867	0.01255	0.00765	0.54268	0.03466	0.02115	0.03313	0.00821	0.01592	0.01628	0.01956	0.02085	0.86421	0.86382	0.00858	0	0.00768	0.02857	0.0113	0.06919	0.03029	0.11007	0.01277	0.0933	0.02851	0.85108	0.17651	0.86121	0.07121	0.00586	0.00824	0.02742	0.86193	0.01755	0.00737	0.01578	0.01136	0.11778	0.84739	0.04228	0.86016	0.25909	0.84375	0.09201	0.08184	0.09316	0.03515	0.8321	0.87098
LB-21	0.00561	0.0174	0.00299	0.55413	0.03456	0.02392	0.03551	0.01181	0.01586	0.01129	0.0228	0.0233	0.88542	0.88447	0.00425	0.00768	0	0.02302	0.01263	0.07302	0.03128	0.11895	0.01154	0.09096	0.02551	0.8719	0.18533	0.8812	0.07425	0.00661	0.00767	0.03207	0.88227	0.02102	0.00543	0.021	0.01012	0.12971	0.86379	0.04255	0.87986	0.25899	0.86033	0.0929	0.08339	0.1008	0.03172	0.8517	0.88286
LB-22	0.03991	0.01766	0.02052	0.5368	0.04228	0.01934	0.02483	0.02108	0.03326	0.01535	0.04222	0.04235	0.87547	0.87836	0.02031	0.02857	0.02302	0	0.03426	0.08915	0.02835	0.12807	0.00789	0.05164	0.03282	0.8715	0.19558	0.8748	0.04409	0.02488	0.03603	0.04162	0.87393	0.02625	0.03299	0.01972	0.0192	0.08421	0.84982	0.03629	0.87364	0.17895	0.80711	0.03784	0.05432	0.07321	0.01592	0.82586	0.86473
LB-23	0.01431	0.02128	0.01637	0.53323	0.01501	0.01421	0.02252	0.0158	0.00351	0.01972	0.00574	0.00425	0.79006	0.79134	0.01308	0.0113	0.01263	0.03426	0	0.0387	0.01766	0.11457	0.01907	0.07928	0.00926	0.76997	0.16024	0.77831	0.06841	0.00948	0.00408	0.01118	0.78646	0.02016	0.00625	0.02149	0.01604	0.13057	0.77908	0.02523	0.78795	0.2491	0.78007	0.10035	0.06682	0.07323	0.02982	0.75392	0.86559
LB-24	0.0799	0.07719	0.0764	0.444	0.02214	0.05193	0.04549	0.07744	0.03716	0.06154	0.02611	0.02558	0.61091	0.61531	0.06747	0.06919	0.07302	0.08915	0.0387	0	0.05136	0.15113	0.07464	0.10406	0.0273	0.5773	0.14565	0.58886	0.12016	0.06671	0.0472	0.02963	0.6022	0.08415	0.06382	0.07069	0.0724	0.18822	0.60647	0.03636	0.61298	0.27002	0.6321	0.14339	0.07001	0.07019	0.07233	0.57295	0.82621
LB-25	0.04283	0.0232	0.03504	0.52019	0.02138	0.00476	0.00934	0.02153	0.01806	0.02684	0.01938	0.02222	0.77029	0.77678	0.03367	0.03029	0.03128	0.02835	0.01766	0.05136	0	0.14262	0.02201	0.03198	0.01165	0.76018	0.16952	0.75971	0.0268	0.03285	0.02572	0.01598	0.76831	0.01391	0.02597	0.01664	0.03615	0.0749	0.75481	0.01073	0.77368	0.15177	0.70697	0.05772	0.03931	0.03906	0.01247	0.71228	0.83045
LB-26	0.11447	0.11147	0.11735	0.60284	0.13307	0.12684	0.13991	0.11784	0.1211	0.12427	0.12019	0.11453	0.84822	0.8488	0.11	0.11007	0.11895	0.12807	0.11457	0.15113	0.14262	0	0.11522	0.20434	0.13441	0.84406	0.10036	0.85253	0.17807	0.10091	0.10874	0.11721	0.85138	0.12884	0.11397	0.12106	0.1005	0.22255	0.85211	0.14499	0.84251	0.36201	0.84726	0.18621	0.13552	0.15039	0.12948	0.81228	0.92483
LB-27	0.02085	0.00917	0.00972	0.52466	0.03358	0.01414	0.02404	0.01019	0.02188	0.00853	0.02814	0.02771	0.87303	0.87485	0.00931	0.01277	0.01154	0.00789	0.01907	0.07464	0.02201	0.11522	0	0.06255	0.02457	0.86559	0.18222	0.87072	0.04889	0.01085	0.01867	0.0279	0.87066	0.01616	0.01598	0.01329	0.00825	0.09149	0.85155	0.03113	0.87098	0.20035	0.81988	0.05007	0.05652	0.07165	0.01781	0.82763	0.85962
LB-28	0.11716	0.06594	0.09532	0.49969	0.06845	0.03742	0.03164	0.06991	0.07601	0.074	0.07671	0.08405	0.74503	0.75766	0.09701	0.0933	0.09096	0.05164	0.07928	0.10406	0.03198	0.20434	0.06255	0	0.05365	0.7475	0.21608	0.73948	0.0141	0.09688	0.09292	0.06539	0.74599	0.05251	0.09093	0.05041	0.09682	0.04665	0.72637	0.03748	0.75371	0.07032	0.61627	0.04668	0.03943	0.03852	0.03284	0.65993	0.78555
LB-29	0.03623	0.03057	0.02998	0.51089	0.00616	0.01197	0.0131	0.02844	0.00801	0.02214	0.00882	0.00845	0.73778	0.74469	0.02534	0.02851	0.02551	0.03282	0.00926	0.0273	0.01165	0.13441	0.02457	0.05365	0	0.71807	0.1606	0.72362	0.05823	0.02627	0.01698	0.00852	0.73356	0.0296	0.02082	0.02552	0.03029	0.12155	0.72949	0.01007	0.73941	0.20526	0.7135	0.08412	0.0441	0.04717	0.02266	0.69096	0.84821
LB-30	0.87671	0.859	0.88254	0.74874	0.69464	0.77504	0.73224	0.85324	0.75742	0.84157	0.72634	0.72128	0.0182	0.01671	0.86519	0.85108	0.8719	0.8715	0.76997	0.5773	0.76018	0.84406	0.86559	0.7475	0.71807	0	0.75297	0.00498	0.82117	0.84569	0.80156	0.71624	0.00932	0.84588	0.8396	0.82892	0.86545	0.86742	0.03709	0.69838	0.02172	0.79359	0.12239	0.86311	0.69069	0.66811	0.80275	0.03268	0.92805
LB-31	0.18913	0.17011	0.18726	0.46934	0.15792	0.167	0.1711	0.1794	0.16278	0.18157	0.15256	0.15285	0.76716	0.77445	0.17952	0.17651	0.18533	0.19558	0.16024	0.14565	0.16952	0.10036	0.18222	0.21608	0.1606	0.75297	0	0.75489	0.20773	0.17462	0.16209	0.15122	0.76936	0.18225	0.17284	0.17038	0.1816	0.26393	0.78616	0.16715	0.76587	0.35581	0.77044	0.24336	0.15041	0.15662	0.17554	0.71575	0.84884
LB-32	0.88705	0.8646	0.89214	0.76412	0.70246	0.77715	0.73576	0.85939	0.76695	0.84834	0.73629	0.73004	0.01107	0.01325	0.87516	0.86121	0.8812	0.8748	0.77831	0.58886	0.75971	0.85253	0.87072	0.73948	0.72362	0.00498	0.75489	0	0.81291	0.85514	0.81148	0.7218	0.00737	0.84646	0.84817	0.83483	0.87399	0.857	0.04552	0.70003	0.01626	0.76769	0.09814	0.8569	0.68833	0.66285	0.80246	0.02151	0.93228
LB-35	0.09204	0.04744	0.07736	0.51557	0.07475	0.02933	0.03275	0.04719	0.06788	0.06905	0.07199	0.07949	0.8125	0.82107	0.08087	0.07121	0.07425	0.04409	0.06841	0.12016	0.0268	0.17807	0.04889	0.0141	0.05823	0.82117	0.20773	0.81291	0	0.07631	0.07874	0.0614	0.81464	0.0278	0.07126	0.03465	0.07831	0.02943	0.79043	0.04315	0.81943	0.08211	0.68089	0.04472	0.04963	0.04878	0.02579	0.73181	0.79238
LB-36	0.00638	0.01645	0.00746	0.54443	0.03274	0.0231	0.03675	0.01181	0.01526	0.01595	0.021	0.01693	0.85883	0.85764	0.00578	0.00586	0.00661	0.02488	0.00948	0.06671	0.03285	0.10091	0.01085	0.09688	0.02627	0.84569	0.17462	0.85514	0.07631	0	0.00803	0.02492	0.85617	0.02026	0.00565	0.0221	0.00421	0.13025	0.84219	0.04217	0.85449	0.26522	0.842	0.09133	0.07985	0.09352	0.0346	0.82755	0.87911
LB-37	0.0081	0.02122	0.00996	0.53649	0.02399	0.02141	0.03181	0.01492	0.00885	0.01585	0.00994	0.01032	0.82137	0.82024	0.00961	0.00824	0.00767	0.03603	0.00408	0.0472	0.02572	0.10874	0.01867	0.09292	0.01698	0.80156	0.16209	0.81148	0.07874	0.00803	0	0.01907	0.81765	0.02333	0.00473	0.02328	0.01472	0.14117	0.80779	0.03489	0.8167	0.26841	0.81551	0.10747	0.07814	0.08896	0.03751	0.78891	0.86925
LB-38	0.03696	0.03062	0.03607	0.50142	0.0063	0.01391	0.01848	0.02864	0.01175	0.03099	0.00927	0.00807	0.73596	0.74285	0.02892	0.02742	0.03207	0.04162	0.01118	0.02963	0.01598	0.11721	0.0279	0.06539	0.00852	0.71624	0.15122	0.7218	0.0614	0.02492	0.01907	0	0.73118	0.02797	0.02136	0.02687	0.03061	0.11986	0.73044	0.01057	0.73735	0.21419	0.7163	0.09036	0.04716	0.03968	0.02845	0.68892	0.82305
LB-39	0.8872	0.86377	0.89226	0.76907	0.71388	0.78235	0.74216	0.85892	0.77505	0.85114	0.746	0.74153	0.00547	0.00515	0.8768	0.86193	0.88227	0.87393	0.78646	0.6022	0.76831	0.85138	0.87066	0.74599	0.73356	0.00932	0.76936	0.00737	0.81464	0.85617	0.81765	0.73118	0	0.84641	0.85138	0.83418	0.87375	0.85073	0.03329	0.7074	0.00839	0.76907	0.08588	0.85238	0.69283	0.67005	0.8041	0.02178	0.93592
LB-40	0.02529	0.01448	0.02449	0.54357	0.04183	0.0106	0.02455	0.00934	0.02377	0.03008	0.02983	0.03229	0.84636	0.84865	0.02603	0.01755	0.02102	0.02625	0.02016	0.08415	0.01391	0.12884	0.01616	0.05251	0.0296	0.84588	0.18225	0.84646	0.0278	0.02026	0.02333	0.02797	0.84641	0	0.01581	0.01224	0.02557	0.0698	0.82781	0.0313	0.84651	0.17572	0.7771	0.06622	0.06182	0.06628	0.01738	0.79517	0.8452
LB-41	0.005	0.01868	0.00939	0.54567	0.02891	0.02064	0.03446	0.01183	0.01089	0.01924	0.01619	0.01537	0.85463	0.85481	0.00856	0.00737	0.00543	0.03299	0.00625	0.06382	0.02597	0.11397	0.01598	0.09093	0.02082	0.8396	0.17284	0.84817	0.07126	0.00565	0.00473	0.02136	0.85138	0.01581	0	0.02128	0.01271	0.13117	0.83869	0.03747	0.85031	0.25986	0.83586	0.10342	0.08113	0.09085	0.03316	0.82012	0.87106
LB-42	0.03053	0.01038	0.02117	0.51739	0.033	0.01006	0.01585	0.0099	0.02098	0.02193	0.0241	0.03022	0.83664	0.84045	0.02232	0.01578	0.021	0.01972	0.02149	0.07069	0.01664	0.12106	0.01329	0.05041	0.02552	0.82892	0.17038	0.83483	0.03465	0.0221	0.02328	0.02687	0.83418	0.01224	0.02128	0	0.02524	0.06872	0.81578	0.02742	0.83536	0.18303	0.7758	0.05935	0.05352	0.0609	0.01603	0.78476	0.84214
LB-43	0.01186	0.01657	0.00879	0.54961	0.03747	0.02536	0.03963	0.01697	0.02221	0.01313	0.0287	0.02319	0.87655	0.87589	0.00624	0.01136	0.01012	0.0192	0.01604	0.0724	0.03615	0.1005	0.00825	0.09682	0.03029	0.86545	0.1816	0.87399	0.07831	0.00421	0.01472	0.03061	0.87375	0.02557	0.01271	0.02524	0	0.12674	0.85776	0.04508	0.87291	0.25563	0.85223	0.0764	0.07663	0.09355	0.03385	0.84456	0.88752
LB-44	0.14937	0.08259	0.12706	0.56459	0.13633	0.07145	0.07735	0.08711	0.12959	0.11536	0.13419	0.1432	0.84514	0.85545	0.13328	0.11778	0.12971	0.08421	0.13057	0.18822	0.0749	0.22255	0.09149	0.04665	0.12155	0.86742	0.26393	0.857	0.02943	0.13025	0.14117	0.11986	0.85073	0.0698	0.13117	0.06872	0.12674	0	0.82513	0.09304	0.85475	0.06557	0.67687	0.05135	0.0855	0.082	0.06394	0.76109	0.81344
LB-45	0.87162	0.84572	0.87442	0.73827	0.71424	0.76988	0.73045	0.84067	0.76692	0.83613	0.74298	0.74069	0.05437	0.03899	0.86217	0.84739	0.86379	0.84982	0.77908	0.60647	0.75481	0.85211	0.85155	0.72637	0.72949	0.03709	0.78616	0.04552	0.79043	0.84219	0.80779	0.73044	0.03329	0.82781	0.83869	0.81578	0.85776	0.82513	0	0.69983	0.05536	0.74506	0.11479	0.81979	0.68198	0.66944	0.78513	0.06013	0.89909
LB-46	0.05645	0.03466	0.04611	0.4965	0.01116	0.01233	0.01179	0.03581	0.02327	0.0318	0.02115	0.02368	0.71207	0.72151	0.04204	0.04228	0.04255	0.03629	0.02523	0.03636	0.01073	0.14499	0.03113	0.03748	0.01007	0.69838	0.16715	0.70003	0.04315	0.04217	0.03489	0.01057	0.7074	0.0313	0.03747	0.02742	0.04508	0.09304	0.69983	0	0.71584	0.15615	0.65971	0.06121	0.03027	0.02193	0.01836	0.65344	0.8126
LB-48	0.88369	0.86284	0.88876	0.79696	0.72039	0.7856	0.74623	0.85659	0.77701	0.85027	0.74927	0.74489	0.00451	0.00747	0.87492	0.86016	0.87986	0.87364	0.78795	0.61298	0.77368	0.84251	0.87098	0.75371	0.73941	0.02172	0.76587	0.01626	0.81943	0.85449	0.8167	0.73735	0.00839	0.84651	0.85031	0.83536	0.87291	0.85475	0.05536	0.71584	0	0.78207	0.08598	0.8596	0.70135	0.68067	0.80645	0.03077	0.97324
LB-49	0.29304	0.20241	0.2587	0.56476	0.22695	0.16283	0.16068	0.21429	0.24509	0.22227	0.24679	0.25595	0.76144	0.7798	0.26382	0.25909	0.25899	0.17895	0.2491	0.27002	0.15177	0.36201	0.20035	0.07032	0.20526	0.79359	0.35581	0.76769	0.08211	0.26522	0.26841	0.21419	0.76907	0.17572	0.25986	0.18303	0.25563	0.06557	0.74506	0.15615	0.78207	0	0.53421	0.08972	0.12857	0.1131	0.14216	0.64942	0.76599
LB-50	0.87874	0.81304	0.86936	0.77662	0.71102	0.72592	0.68845	0.8139	0.77062	0.81838	0.74746	0.74875	0.07515	0.08921	0.8633	0.84375	0.86033	0.80711	0.78007	0.6321	0.70697	0.84726	0.81988	0.61627	0.7135	0.12239	0.77044	0.09814	0.68089	0.842	0.81551	0.7163	0.08588	0.7771	0.83586	0.7758	0.85223	0.67687	0.11479	0.65971	0.08598	0.53421	0	0.71959	0.61644	0.58317	0.72706	0.04341	0.9023
LB-51	0.11703	0.05855	0.08573	0.52751	0.09786	0.0544	0.05957	0.0722	0.10165	0.06221	0.10736	0.10884	0.85239	0.86	0.08728	0.09201	0.0929	0.03784	0.10035	0.14339	0.05772	0.18621	0.05007	0.04668	0.08412	0.86311	0.24336	0.8569	0.04472	0.09133	0.10747	0.09036	0.85238	0.06622	0.10342	0.05935	0.0764	0.05135	0.81979	0.06121	0.8596	0.08972	0.71959	0	0.05763	0.06361	0.04339	0.78209	0.81952
LB-52	0.10321	0.05983	0.08477	0.48695	0.04881	0.03862	0.03502	0.06914	0.06371	0.06288	0.06132	0.06225	0.69457	0.70566	0.07952	0.08184	0.08339	0.05432	0.06682	0.07001	0.03931	0.13552	0.05652	0.03943	0.0441	0.69069	0.15041	0.68833	0.04963	0.07985	0.07814	0.04716	0.69283	0.06182	0.08113	0.05352	0.07663	0.0855	0.68198	0.03027	0.70135	0.12857	0.61644	0.05763	0	0.02849	0.03591	0.62395	0.82703
LB-53	0.11805	0.07391	0.10395	0.48906	0.04669	0.04343	0.04013	0.08058	0.07202	0.07962	0.06654	0.06867	0.67149	0.68814	0.09836	0.09316	0.1008	0.07321	0.07323	0.07019	0.03906	0.15039	0.07165	0.03852	0.04717	0.66811	0.15662	0.66285	0.04878	0.09352	0.08896	0.03968	0.67005	0.06628	0.09085	0.0609	0.09355	0.082	0.66944	0.02193	0.68067	0.1131	0.58317	0.06361	0.02849	0	0.04574	0.59251	0.77764
LB-54	0.04626	0.01931	0.03346	0.53524	0.03091	0.00783	0.01185	0.02172	0.02565	0.02745	0.03223	0.03494	0.80508	0.81081	0.03105	0.03515	0.03172	0.01592	0.02982	0.07233	0.01247	0.12948	0.01781	0.03284	0.02266	0.80275	0.17554	0.80246	0.02579	0.0346	0.03751	0.02845	0.8041	0.01738	0.03316	0.01603	0.03385	0.06394	0.78513	0.01836	0.80645	0.14216	0.72706	0.04339	0.03591	0.04574	0	0.74583	0.85273
LB-55	0.86403	0.82062	0.86338	0.7318	0.67529	0.73099	0.68775	0.81794	0.74296	0.81551	0.71215	0.71031	0.02045	0.03019	0.84984	0.8321	0.8517	0.82586	0.75392	0.57295	0.71228	0.81228	0.82763	0.65993	0.69096	0.03268	0.71575	0.02151	0.73181	0.82755	0.78891	0.68892	0.02178	0.79517	0.82012	0.78476	0.84456	0.76109	0.06013	0.65344	0.03077	0.64942	0.04341	0.78209	0.62395	0.59251	0.74583	0	0.89142
LB-56	0.8877	0.86297	0.88281	0.48535	0.83498	0.8454	0.83732	0.85927	0.86778	0.87271	0.84247	0.86544	0.96759	0.95013	0.88587	0.87098	0.88286	0.86473	0.86559	0.82621	0.83045	0.92483	0.85962	0.78555	0.84821	0.92805	0.84884	0.93228	0.79238	0.87911	0.86925	0.82305	0.93592	0.8452	0.87106	0.84214	0.88752	0.81344	0.89909	0.8126	0.97324	0.76599	0.9023	0.81952	0.82703	0.77764	0.85273	0.89142	0
LB-57	0.0302	0.01306	0.02076	0.53113	0.02288	0.00342	0.01028	0.01303	0.01606	0.0157	0.02048	0.02166	0.80437	0.80924	0.02	0.02009	0.01854	0.0143	0.01556	0.05861	0.00582	0.12382	0.01009	0.03777	0.01348	0.79794	0.16855	0.79967	0.02951	0.02045	0.02036	0.01823	0.80309	0.00994	0.01865	0.01054	0.02089	0.07313	0.78502	0.01387	0.80499	0.16167	0.74098	0.04771	0.03814	0.04565	0.00662	0.75136	0.85074
LB-58	0.0806	0.05187	0.07306	0.49729	0.02121	0.01988	0.01853	0.05221	0.03095	0.05926	0.03077	0.03102	0.67599	0.68705	0.06416	0.06316	0.06706	0.05323	0.03639	0.04415	0.01882	0.15083	0.05045	0.03862	0.01899	0.66384	0.16114	0.66275	0.04444	0.0611	0.05467	0.01987	0.67344	0.04207	0.05546	0.04146	0.06475	0.0958	0.67149	0.01277	0.68264	0.14994	0.62328	0.07602	0.03036	0.02479	0.02522	0.61438	0.82311
LB-59	0.86345	0.83773	0.86723	0.74297	0.67714	0.75215	0.7081	0.83265	0.74173	0.82478	0.71041	0.70699	0.01457	0.01723	0.85062	0.83468	0.85609	0.84827	0.75402	0.56599	0.736	0.82154	0.84537	0.71286	0.70014	0.00689	0.72901	0.00538	0.78638	0.83037	0.78665	0.69695	0.01067	0.82102	0.82372	0.80595	0.8507	0.83099	0.04611	0.6756	0.01825	0.74917	0.09818	0.83451	0.66433	0.63625	0.77618	0.01932	0.90441
LB-60	0.0863	0.09015	0.08782	0.54931	0.09345	0.07989	0.08508	0.07063	0.07128	0.09928	0.06996	0.0758	0.78305	0.7803	0.09204	0.07494	0.08362	0.11442	0.0666	0.11043	0.07475	0.21331	0.09717	0.12992	0.08191	0.76626	0.22028	0.77059	0.10837	0.08634	0.06768	0.08597	0.78271	0.07136	0.075	0.0806	0.10299	0.17319	0.7722	0.0988	0.78045	0.28816	0.76893	0.18158	0.14446	0.14986	0.10488	0.74555	0.81113
LB-61	0.02082	0.01974	0.01909	0.53172	0.01187	0.01035	0.0174	0.01675	0.00399	0.02009	0.00626	0.00747	0.79043	0.7941	0.01393	0.01609	0.01516	0.03142	0.00541	0.03902	0.01463	0.12037	0.01935	0.0714	0.00833	0.77202	0.16104	0.77975	0.06223	0.01612	0.00918	0.01024	0.7867	0.02002	0.01051	0.01845	0.02096	0.12083	0.77929	0.01922	0.78902	0.22905	0.77303	0.09133	0.05849	0.06513	0.02104	0.75069	0.86292
LB-62	0.01758	0.01815	0.01476	0.5393	0.03955	0.02916	0.04029	0.01612	0.02326	0.02204	0.02566	0.02261	0.84674	0.84446	0.01366	0.00817	0.01759	0.03171	0.01713	0.06818	0.0413	0.0993	0.01694	0.10514	0.03592	0.83146	0.17468	0.84362	0.08442	0.00826	0.0153	0.03197	0.84392	0.03048	0.01764	0.02377	0.01052	0.12648	0.82999	0.05013	0.8428	0.27367	0.83573	0.09213	0.08398	0.09738	0.04402	0.81734	0.87802
LB-63	0.11113	0.05891	0.09696	0.53777	0.08466	0.03902	0.04583	0.06542	0.08602	0.08116	0.08769	0.09373	0.78283	0.7946	0.09886	0.08882	0.09483	0.06134	0.08453	0.12473	0.03385	0.17513	0.06273	0.0238	0.06936	0.79683	0.19964	0.78523	0.01334	0.09423	0.09625	0.06867	0.78585	0.0412	0.08904	0.04898	0.09256	0.02941	0.76678	0.0442	0.79253	0.06408	0.64018	0.03695	0.04549	0.0347	0.03392	0.69921	0.80386
LB-64	0.03274	0.01712	0.02833	0.51446	0.01737	0.0049	0.01151	0.01534	0.01394	0.02547	0.01533	0.0166	0.78369	0.78988	0.02563	0.02142	0.02507	0.02472	0.01266	0.0505	0.00651	0.11391	0.01621	0.04375	0.01201	0.77365	0.15194	0.77576	0.03263	0.0212	0.01963	0.00905	0.7814	0.0104	0.01784	0.01298	0.02559	0.08281	0.77142	0.01067	0.78483	0.17424	0.73112	0.06284	0.03924	0.03711	0.0123	0.72845	0.832
LB-65	0.0094	0.01136	0.00792	0.54544	0.03132	0.01315	0.02591	0.00585	0.01338	0.01436	0.01914	0.02037	0.85972	0.86041	0.00948	0.00576	0.00566	0.02179	0.00953	0.07017	0.01853	0.11771	0.00917	0.07202	0.02136	0.85022	0.1771	0.85678	0.05241	0.00738	0.00809	0.02335	0.85753	0.00862	0.00457	0.01183	0.01239	0.10179	0.83957	0.03183	0.85634	0.22444	0.82035	0.0785	0.06946	0.07932	0.02295	0.81959	0.86378
LB-66	0.01387	0.01508	0.01368	0.54379	0.03105	0.01479	0.02736	0.00817	0.0133	0.02327	0.01892	0.0203	0.84827	0.8489	0.01396	0.00858	0.01053	0.02955	0.01112	0.07036	0.02174	0.11981	0.01566	0.07714	0.02388	0.83692	0.17534	0.84433	0.05621	0.01102	0.01202	0.02362	0.84574	0.01105	0.00678	0.01422	0.01858	0.10323	0.82971	0.03413	0.84507	0.23079	0.81359	0.08849	0.0732	0.08104	0.02562	0.80891	0.85975
LB-67	0.03785	0.01442	0.02571	0.52662	0.03236	0.00988	0.01175	0.01444	0.02378	0.0236	0.02849	0.03312	0.82758	0.83362	0.02769	0.02227	0.02416	0.01574	0.0244	0.07393	0.01403	0.1309	0.01405	0.03892	0.02336	0.82111	0.17857	0.82485	0.02736	0.02628	0.02883	0.02724	0.82636	0.01381	0.02561	0.00929	0.02953	0.06835	0.80673	0.02289	0.82767	0.16684	0.7578	0.05305	0.04833	0.05391	0.01189	0.7699	0.84313
LB-68	0.06606	0.05684	0.05858	0.43164	0.02258	0.04296	0.03863	0.06045	0.03492	0.04696	0.02622	0.02435	0.68723	0.69085	0.05081	0.05297	0.05801	0.06265	0.03409	0.01288	0.04682	0.11257	0.05289	0.09508	0.02804	0.65898	0.12458	0.66947	0.10243	0.04836	0.04047	0.02647	0.67988	0.06952	0.05354	0.05336	0.0501	0.1619	0.68055	0.03438	0.68925	0.25686	0.69079	0.11412	0.05984	0.06191	0.05745	0.64273	0.81537
PP-1	0.00472	0.02571	0.00656	0.55751	0.04259	0.03552	0.0515	0.02014	0.02165	0.01745	0.0279	0.02651	0.89099	0.88859	0.00775	0.01105	0.00605	0.0387	0.016	0.07626	0.04297	0.1266	0.02064	0.11601	0.03395	0.87485	0.1935	0.88623	0.09623	0.00942	0.00977	0.03813	0.88721	0.03077	0.0078	0.03232	0.01306	0.15256	0.87235	0.05507	0.88507	0.29225	0.88317	0.11258	0.10232	0.11878	0.04876	0.86658	0.88446
PS-1'	0.93114	0.9012	0.92446	0.66241	0.91424	0.90592	0.90711	0.9141	0.92956	0.91679	0.9139	0.92438	1.07741	1.097	0.92621	0.91411	0.9242	0.91122	0.92585	0.89052	0.91084	0.95611	0.90855	0.89155	0.91664	1.07983	0.84391	1.07888	0.88322	0.9237	0.9278	0.9118	1.08228	0.90679	0.92769	0.89452	0.92035	0.85646	1.10039	0.9038	1.10219	0.86372	1.04605	0.88811	0.89574	0.88423	0.90892	1.0318	0.9587
PS-1	0.94121	0.9109	0.93485	0.65773	0.93692	0.9207	0.92187	0.92333	0.94555	0.92961	0.93182	0.94491	1.10849	1.11854	0.93864	0.92584	0.93608	0.9211	0.94248	0.90936	0.92609	0.96751	0.9199	0.9075	0.93764	1.10833	0.8515	1.10865	0.89423	0.93671	0.94205	0.93336	1.10829	0.91689	0.94295	0.90284	0.93235	0.85684	1.11587	0.92367	1.12863	0.87359	1.06996	0.89554	0.91632	0.90593	0.92029	1.06393	0.94213
PVC-1	1.009	0.98257	1.00202	0.94188	0.99531	0.99525	0.98073	0.99069	1.00308	1.00327	0.98855	1.00597	0.96654	0.96886	1.00384	0.98868	1.00563	1.00465	1.00697	0.98468	1.00008	0.96166	0.99611	0.98452	1.00733	0.96884	0.93451	0.97591	0.98051	1.00325	1.00114	0.99587	0.96731	1.0019	1.00992	0.96378	1.00899	0.94125	0.97586	0.99151	0.96765	0.96341	0.94035	0.9768	0.96615	0.96283	0.99455	0.94642	0.98577
PE-1	0.83871	0.82672	0.84686	0.72245	0.6548	0.74135	0.70193	0.81972	0.7179	0.80678	0.68433	0.67932	0.07119	0.06402	0.82747	0.81534	0.83602	0.84454	0.72886	0.53485	0.72354	0.82642	0.83507	0.72277	0.68092	0.03238	0.72248	0.03794	0.7951	0.80978	0.76084	0.67657	0.05493	0.81326	0.8014	0.80042	0.83149	0.85513	0.07683	0.66504	0.07979	0.78591	0.18956	0.84566	0.67131	0.64412	0.7759	0.07649	0.85058
PET-1	0.9766	0.97241	0.97772	0.89991	0.91269	0.95397	0.93856	0.96919	0.94068	0.96609	0.92733	0.94176	0.84558	0.82882	0.97549	0.9668	0.97787	0.98358	0.94792	0.89564	0.94961	0.9328	0.97784	0.95265	0.93807	0.81156	0.91521	0.82028	0.97322	0.97392	0.95258	0.91787	0.82616	0.97396	0.96902	0.96087	0.98179	0.98746	0.81542	0.91486	0.82769	0.96579	0.86036	0.97409	0.93735	0.87787	0.95916	0.82273	0.58569
PE-1'	0.86445	0.85365	0.87278	0.75081	0.68175	0.76854	0.72818	0.84697	0.74459	0.83217	0.71225	0.70531	0.03263	0.03159	0.85379	0.84248	0.86173	0.86968	0.75571	0.56043	0.75144	0.8423	0.86098	0.74979	0.70584	0.01029	0.73615	0.01219	0.82306	0.83584	0.78732	0.70451	0.0245	0.84021	0.82737	0.82747	0.8572	0.88024	0.06241	0.69161	0.03819	0.80712	0.15325	0.8716	0.69013	0.6691	0.80026	0.04812	0.92372
PVC-1'	1.01373	0.98761	1.00692	0.95274	1.0026	1.0013	0.98677	0.99507	1.00928	1.00893	0.99484	1.01212	0.97555	0.9776	1.00877	0.99339	1.01122	1.01076	1.01282	0.99336	1.00639	0.96834	1.00247	0.99263	1.0144	0.97763	0.94264	0.98501	0.98658	1.00913	1.00697	1.00262	0.97603	1.00767	1.01502	0.96961	1.01456	0.94427	0.98337	0.99938	0.97698	0.9708	0.94999	0.98424	0.97409	0.97074	1.00035	0.95613	0.99153
PU	0.83396	0.75621	0.79984	0.56531	0.74293	0.73387	0.7005	0.75809	0.76915	0.77601	0.75461	0.77678	0.8359	0.85934	0.80199	0.7884	0.80501	0.74077	0.78242	0.76044	0.72578	0.8092	0.74788	0.62764	0.7401	0.8407	0.75953	0.83361	0.65916	0.79901	0.79673	0.7402	0.83937	0.75511	0.79573	0.72764	0.80666	0.66198	0.84185	0.71073	0.84465	0.58959	0.71829	0.68366	0.65373	0.65601	0.72361	0.75612	0.70767
ABS	0.92137	0.89404	0.91213	0.45555	0.90912	0.90308	0.89797	0.90496	0.92359	0.90521	0.9096	0.92028	1.11694	1.13028	0.91518	0.90569	0.9142	0.89815	0.92021	0.86134	0.90684	0.95221	0.89537	0.8847	0.91271	1.10931	0.79106	1.11373	0.87619	0.91444	0.92051	0.90786	1.11546	0.8998	0.91815	0.88069	0.90914	0.86034	1.11767	0.90189	1.13846	0.86117	1.07947	0.87821	0.89826	0.88397	0.90162	1.0632	0.8382
PA66	0.94767	0.92292	0.93797	0.91868	0.90007	0.90765	0.87415	0.92207	0.90577	0.93191	0.902	0.91631	0.90813	0.90297	0.93534	0.9325	0.9254	0.90228	0.92158	0.90473	0.91045	0.9354	0.9259	0.85421	0.9037	0.88004	0.92649	0.8843	0.88176	0.93835	0.92814	0.90779	0.89314	0.92847	0.93466	0.89827	0.95004	0.88959	0.87738	0.89815	0.90311	0.8967	0.88617	0.92842	0.8914	0.89268	0.89845	0.87288	0.96152
PC	1.05845	1.06484	1.06987	1.04672	1.06231	1.06642	1.06895	1.06232	1.067	1.06819	1.06346	1.06153	1.01814	1.02056	1.06787	1.05599	1.06624	1.07685	1.05873	1.06595	1.06483	1.07118	1.0684	1.07345	1.06386	1.01601	1.0842	1.0196	1.07026	1.06156	1.06304	1.0571	1.01852	1.05798	1.05999	1.06447	1.06106	1.06127	1.01437	1.06014	1.02049	1.05657	1.02964	1.06307	1.06819	1.05141	1.0709	1.02181	0.99079
PTFE	1.01628	1.0281	1.02314	1.05362	1.02717	1.04219	1.04555	1.03214	1.01991	1.03047	1.01539	1.01694	1.01908	1.01335	1.01698	1.01729	1.02359	1.05051	1.01998	1.01732	1.05036	1.01638	1.03994	1.08193	1.03532	1.00445	1.01598	1.01296	1.07949	1.02369	1.01877	1.03255	1.01887	1.04571	1.02331	1.04112	1.02371	1.08809	1.02701	1.05058	1.01467	1.12768	1.07938	1.08118	1.08289	1.06481	1.05323	1.04132	1.01435
PVC-Com-2	0.87815	0.87429	0.88456	0.71877	0.85846	0.8769	0.87786	0.87488	0.8703	0.88894	0.8454	0.86403	0.99855	0.98956	0.8832	0.87102	0.88574	0.90553	0.86649	0.84245	0.86519	0.89056	0.88724	0.87364	0.87215	0.96663	0.84154	0.97102	0.86746	0.87937	0.86362	0.85165	0.98513	0.8751	0.87199	0.86754	0.89294	0.89514	0.97793	0.86628	1.00377	0.90892	1.00527	0.90376	0.90008	0.85469	0.89733	0.97097	0.52686
PVC-Com-3	0.88036	0.87654	0.88677	0.72604	0.86084	0.87895	0.87997	0.87649	0.87279	0.89142	0.84838	0.86679	0.99939	0.99035	0.88538	0.87345	0.88748	0.90709	0.86897	0.84572	0.86706	0.89065	0.88911	0.87598	0.87448	0.96854	0.84185	0.9728	0.8686	0.88142	0.86628	0.85354	0.98616	0.87674	0.87421	0.86959	0.8949	0.89503	0.97833	0.86761	1.005	0.90769	1.00428	0.9034	0.90157	0.85504	0.89809	0.9715	0.53269
PVC-Com-4	0.96869	0.96298	0.97384	0.84442	0.96623	0.97373	0.97888	0.96622	0.97282	0.97801	0.95405	0.96856	1.0144	1.00036	0.9724	0.96362	0.97936	0.99354	0.96913	0.94684	0.96649	0.95011	0.97618	0.98151	0.97837	0.99101	0.92999	1.00099	0.96206	0.971	0.96324	0.95377	0.99877	0.97083	0.96945	0.95858	0.97566	0.95629	0.97494	0.96806	1.02254	0.9588	1.00689	0.96385	0.96397	0.95133	0.98742	0.99246	0.7917
PVC-Com-5	0.99492	0.97083	0.99065	0.88407	0.98039	0.98279	0.97354	0.97866	0.99011	0.9931	0.96968	0.98648	0.94064	0.94049	0.9914	0.98338	0.9933	0.99433	0.99089	0.95549	0.98461	0.74282	0.98863	0.97047	0.99064	0.94911	0.72453	0.95031	0.95808	0.98975	0.97463	0.97199	0.94763	0.98628	0.99235	0.9573	0.99602	0.94575	0.96285	0.97575	0.93746	0.95442	0.9198	0.9794	0.90573	0.90596	0.96962	0.89942	0.93736
PVC-Com-6	0.89528	0.89481	0.90391	0.76246	0.88329	0.89743	0.90025	0.89636	0.8948	0.90946	0.87099	0.88542	1.02698	1.02841	0.90117	0.89247	0.90287	0.92568	0.88894	0.87904	0.88949	0.92713	0.90591	0.89173	0.89538	1.0093	0.87794	1.00702	0.88727	0.89898	0.88576	0.87645	1.02482	0.89257	0.89088	0.8912	0.91039	0.90998	1.04408	0.89391	1.03356	0.92787	1.02962	0.93633	0.92328	0.88598	0.91923	1.00378	0.596
PVC-Com-7	0.96963	0.94584	0.96381	0.79292	0.95155	0.95425	0.93814	0.95355	0.96199	0.9628	0.93596	0.96011	0.95432	0.95422	0.96497	0.95408	0.96595	0.96384	0.96319	0.9275	0.95514	0.93116	0.95262	0.92713	0.95901	0.94831	0.89075	0.95342	0.92873	0.96306	0.95571	0.95027	0.95259	0.95879	0.96636	0.92774	0.9699	0.91547	0.96092	0.94767	0.95514	0.9164	0.92157	0.94075	0.92216	0.91986	0.95264	0.9192	0.88375
PVC-Com-8	0.88783	0.88848	0.89608	0.67196	0.87237	0.89027	0.88703	0.88665	0.88449	0.90022	0.85276	0.87488	0.96049	0.95686	0.89439	0.88458	0.89478	0.92019	0.87923	0.85168	0.88324	0.9295	0.89768	0.87969	0.88383	0.93714	0.86663	0.94078	0.88278	0.89079	0.87502	0.86338	0.95372	0.88884	0.88147	0.88095	0.90529	0.91247	0.95817	0.8809	0.96027	0.91868	0.96368	0.93353	0.90352	0.88275	0.91327	0.93552	0.56729
PE-Com-1	0.89568	0.88241	0.90273	0.76038	0.71656	0.79987	0.75857	0.87742	0.77748	0.86269	0.7468	0.74026	0.04043	0.03285	0.88409	0.87309	0.8923	0.89625	0.79012	0.59523	0.78445	0.86606	0.88944	0.77886	0.74097	0.00847	0.77536	0.01651	0.85291	0.86652	0.82113	0.73979	0.02506	0.87234	0.86053	0.85593	0.88585	0.90232	0.03391	0.72461	0.04554	0.82943	0.15705	0.89102	0.71781	0.70118	0.82877	0.05589	0.93513
PE-Com-2	0.89544	0.88369	0.90301	0.75969	0.72035	0.80258	0.76268	0.87778	0.78014	0.86458	0.75023	0.74364	0.03791	0.02752	0.88474	0.87341	0.89285	0.89716	0.79266	0.59862	0.78792	0.86677	0.89045	0.78431	0.74448	0.00831	0.77838	0.01699	0.85513	0.86673	0.823	0.74279	0.02066	0.87251	0.86136	0.85711	0.886	0.90366	0.02885	0.72786	0.04169	0.83401	0.15626	0.89189	0.72168	0.705	0.83083	0.05658	0.92948
PE-Com-3	0.88777	0.87657	0.89548	0.75384	0.71818	0.79823	0.75889	0.87057	0.77564	0.8585	0.74705	0.74064	0.04976	0.0356	0.87778	0.86629	0.88539	0.89046	0.78813	0.59652	0.78424	0.85438	0.88322	0.78134	0.74162	0.01532	0.77444	0.02761	0.85001	0.85961	0.817	0.73983	0.02848	0.86625	0.85498	0.85054	0.87847	0.89748	0.0223	0.72495	0.05357	0.83279	0.16675	0.88478	0.71605	0.70291	0.8252	0.06642	0.92262
PE-Com-4	0.88834	0.87719	0.89661	0.75374	0.71813	0.79717	0.75716	0.86929	0.77468	0.85975	0.74596	0.73996	0.04007	0.02828	0.87922	0.86604	0.88586	0.89069	0.78715	0.59766	0.78255	0.86158	0.88282	0.77797	0.74021	0.01158	0.77769	0.02104	0.84682	0.85979	0.81604	0.73948	0.02252	0.8639	0.85467	0.8495	0.87957	0.89648	0.02634	0.7243	0.04337	0.82818	0.15677	0.88585	0.71697	0.70208	0.82463	0.05828	0.93216
PE-Com-5	0.86277	0.84892	0.86832	0.74976	0.66603	0.75653	0.71406	0.8426	0.73204	0.82426	0.69924	0.69082	0.07133	0.07397	0.8479	0.83799	0.85677	0.86262	0.74424	0.54867	0.73557	0.84394	0.85465	0.73278	0.69155	0.03145	0.72551	0.03274	0.81295	0.83197	0.77864	0.69149	0.06276	0.83579	0.82156	0.82172	0.85388	0.8752	0.09454	0.6794	0.08179	0.79265	0.19077	0.86525	0.68052	0.65629	0.79104	0.07438	0.92003
PE-Com-6	0.86614	0.85662	0.87415	0.75507	0.69753	0.77515	0.73664	0.8491	0.75217	0.83657	0.7262	0.71865	0.05744	0.04411	0.85638	0.84653	0.86382	0.86868	0.76483	0.58001	0.75964	0.8492	0.86208	0.758	0.71988	0.02114	0.76681	0.03053	0.8281	0.83874	0.79457	0.71878	0.03894	0.84305	0.83292	0.83204	0.85842	0.88136	0.03117	0.70431	0.05857	0.81308	0.16866	0.86616	0.7012	0.68789	0.80281	0.07285	0.91093
PE-Com-7	0.89016	0.87819	0.89737	0.75472	0.71541	0.79697	0.75689	0.87247	0.77421	0.85855	0.74518	0.73836	0.05098	0.03947	0.87896	0.86793	0.88702	0.89167	0.78683	0.59455	0.78145	0.8644	0.88445	0.77803	0.73918	0.01443	0.77665	0.02486	0.84939	0.86161	0.81706	0.73777	0.0317	0.86741	0.85571	0.85203	0.88079	0.89889	0.02829	0.72303	0.05573	0.82876	0.16814	0.88595	0.71593	0.70142	0.82536	0.0667	0.9316
PE-Com-8	0.89707	0.88629	0.90441	0.77171	0.72535	0.80562	0.76567	0.87892	0.78323	0.86629	0.75333	0.74634	0.02849	0.01947	0.88707	0.87487	0.89464	0.89907	0.79463	0.60405	0.7907	0.86572	0.89262	0.78738	0.74796	0.00663	0.77787	0.01224	0.8574	0.8681	0.82443	0.74711	0.0162	0.87445	0.86348	0.85991	0.88781	0.90637	0.03311	0.73299	0.03152	0.83756	0.14853	0.89506	0.72603	0.7105	0.83428	0.05204	0.9443
PET-Com-1	0.95537	0.94308	0.95196	0.87601	0.8988	0.93312	0.91624	0.94585	0.92444	0.93658	0.9144	0.92869	0.89298	0.8776	0.94883	0.94343	0.95251	0.94725	0.93331	0.89632	0.93157	0.90641	0.9471	0.92842	0.92354	0.86241	0.91291	0.87088	0.94728	0.95039	0.93657	0.906	0.87437	0.95177	0.95023	0.93609	0.95446	0.96803	0.85145	0.90028	0.87401	0.95078	0.90324	0.93378	0.91615	0.86978	0.92969	0.87288	0.55055
PET-Com-2	0.9609	0.94926	0.95791	0.88713	0.90557	0.93859	0.92098	0.95278	0.93015	0.94219	0.92084	0.93409	0.87878	0.8628	0.95481	0.95049	0.95816	0.95317	0.9393	0.90003	0.93742	0.91287	0.95345	0.93462	0.9292	0.84829	0.91866	0.85702	0.95501	0.95675	0.94183	0.91309	0.86056	0.9583	0.95637	0.94273	0.96038	0.97651	0.83512	0.90585	0.8577	0.95616	0.88933	0.93952	0.92157	0.8785	0.93419	0.86127	0.56462
PET-Com-3	0.98598	0.98294	0.98487	0.88397	0.9405	0.97676	0.96123	0.98294	0.95979	0.97544	0.95072	0.96515	0.88524	0.86682	0.9839	0.97881	0.98604	0.98992	0.96792	0.92443	0.97472	0.91431	0.98751	0.97643	0.9614	0.8581	0.90146	0.86822	0.99433	0.98447	0.96914	0.94854	0.86714	0.99208	0.983	0.97564	0.99041	1.01338	0.85237	0.94621	0.86465	1.00343	0.90581	0.98514	0.95304	0.91293	0.97521	0.87203	0.60479
PET-Com-4	0.98471	0.98078	0.98345	0.87597	0.93841	0.97419	0.95854	0.98061	0.95949	0.97368	0.94855	0.9639	0.88143	0.86449	0.9826	0.9768	0.98495	0.98915	0.96713	0.92395	0.97279	0.92246	0.98508	0.97376	0.96041	0.85697	0.91033	0.86677	0.99136	0.98281	0.96849	0.94526	0.86474	0.98939	0.98164	0.97332	0.98865	1.00881	0.85191	0.94275	0.86131	0.99667	0.89931	0.98113	0.95413	0.9107	0.97319	0.8687	0.59987
PET-Com-5	0.98489	0.98129	0.98361	0.88894	0.93622	0.97196	0.95452	0.98153	0.95771	0.97231	0.9474	0.96149	0.86513	0.84664	0.98264	0.97796	0.98422	0.9879	0.96594	0.91784	0.97015	0.91951	0.98589	0.97079	0.95821	0.8364	0.90922	0.84716	0.99148	0.98354	0.9666	0.94448	0.84725	0.99012	0.98194	0.97301	0.98939	1.00886	0.82875	0.93927	0.84293	0.99241	0.88154	0.97954	0.95137	0.90981	0.96893	0.85044	0.59968
PET-Com-6	0.98276	0.97892	0.98183	0.88291	0.93605	0.97225	0.95651	0.97934	0.95668	0.9715	0.94689	0.96151	0.88324	0.86548	0.98045	0.97554	0.98295	0.98641	0.96462	0.92171	0.97039	0.9165	0.98342	0.97175	0.9578	0.857	0.907	0.86671	0.98989	0.98116	0.96609	0.94358	0.86588	0.9879	0.9798	0.97209	0.98679	1.00931	0.85134	0.94076	0.86257	0.99641	0.90173	0.97961	0.95159	0.90849	0.97012	0.86959	0.59526
PET-Com-7	0.98055	0.97408	0.97857	0.88932	0.92713	0.96261	0.94461	0.97444	0.95019	0.9662	0.93905	0.95401	0.86787	0.84804	0.97719	0.97183	0.97897	0.98133	0.95896	0.91024	0.96054	0.9191	0.9792	0.95951	0.95	0.83509	0.91127	0.84609	0.98104	0.97833	0.96025	0.93526	0.84829	0.98229	0.97667	0.96491	0.98429	0.99725	0.82837	0.92892	0.8465	0.978	0.88077	0.9701	0.94247	0.89847	0.95996	0.84846	0.58481
PET-Com-8	0.9668	0.95887	0.96421	0.87248	0.91478	0.95038	0.93383	0.95984	0.93842	0.95152	0.92791	0.94293	0.89126	0.87389	0.96215	0.95667	0.96503	0.96431	0.94697	0.9068	0.94872	0.90666	0.96253	0.94807	0.93866	0.86159	0.90921	0.87129	0.96626	0.96333	0.94855	0.92202	0.87244	0.96757	0.96271	0.95137	0.96833	0.98643	0.85223	0.91809	0.87143	0.97187	0.90568	0.95402	0.93144	0.88707	0.94735	0.87316	0.56587
PET-Com-9	0.95429	0.94313	0.95115	0.86807	0.89837	0.93348	0.91684	0.94513	0.92338	0.93652	0.91307	0.92793	0.89758	0.88194	0.94797	0.94253	0.95168	0.94754	0.93228	0.89519	0.93184	0.90106	0.94659	0.92964	0.92294	0.86637	0.90799	0.87547	0.94766	0.9493	0.93526	0.90549	0.87871	0.95153	0.94903	0.93592	0.95372	0.96982	0.85625	0.90104	0.87903	0.95416	0.90984	0.93555	0.91586	0.87033	0.9303	0.87724	0.55312
PET-Com-10	0.96218	0.95459	0.95972	0.86917	0.91165	0.94671	0.93125	0.95539	0.93488	0.94732	0.92389	0.93896	0.89543	0.87849	0.95771	0.95214	0.96087	0.96118	0.9429	0.90429	0.94488	0.90387	0.95826	0.94529	0.93501	0.86652	0.90887	0.87597	0.96279	0.95901	0.94412	0.91834	0.87706	0.96328	0.95819	0.94758	0.96387	0.9826	0.85813	0.91511	0.87613	0.96869	0.90998	0.95046	0.93003	0.8848	0.94414	0.87766	0.57053
PET-Com-11	0.98703	0.98363	0.98595	0.87911	0.9416	0.97708	0.96155	0.98348	0.96151	0.9765	0.95121	0.96609	0.8822	0.86405	0.98524	0.9796	0.98729	0.99207	0.96929	0.92481	0.97539	0.91714	0.98841	0.97689	0.96295	0.85577	0.90514	0.86614	0.99472	0.98561	0.97006	0.9488	0.86467	0.99257	0.98408	0.97611	0.99159	1.01195	0.85012	0.9463	0.86175	1.00066	0.90113	0.98506	0.95572	0.91391	0.97577	0.86888	0.6035
PET-Com-12	0.95901	0.94672	0.95577	0.88613	0.9048	0.9372	0.91992	0.95037	0.92972	0.94016	0.91998	0.93345	0.88008	0.86506	0.95294	0.948	0.9563	0.95102	0.93863	0.89995	0.9367	0.91135	0.95106	0.93378	0.92891	0.85145	0.91819	0.85996	0.95369	0.95483	0.94073	0.91217	0.86254	0.95649	0.95485	0.9401	0.95841	0.97363	0.83801	0.90471	0.85921	0.95436	0.88961	0.93696	0.92094	0.87726	0.93265	0.86297	0.57125
PET-Com-13	0.95708	0.94599	0.95404	0.88049	0.90337	0.93709	0.92114	0.9487	0.92793	0.93948	0.91846	0.93262	0.8999	0.88378	0.95098	0.9462	0.95489	0.95012	0.93668	0.90162	0.93581	0.90812	0.94961	0.93395	0.92772	0.87015	0.91728	0.87852	0.95165	0.9527	0.93956	0.91033	0.88136	0.95453	0.9527	0.94003	0.95646	0.97299	0.85813	0.90508	0.88077	0.95595	0.91087	0.93721	0.92114	0.87563	0.93323	0.8811	0.55468
PP-Com-1	0.00612	0.02577	0.01197	0.5497	0.03181	0.02674	0.03913	0.01668	0.0112	0.02196	0.01384	0.01382	0.83328	0.83046	0.01189	0.00979	0.00854	0.04318	0.00613	0.05559	0.03121	0.121	0.02412	0.10432	0.0233	0.81339	0.17678	0.82372	0.08579	0.00928	0.00242	0.02568	0.82959	0.02438	0.00478	0.02845	0.01762	0.15006	0.81798	0.04444	0.82805	0.28446	0.83145	0.12161	0.09178	0.10521	0.04413	0.80488	0.87756
PP-Com-2	0.00898	0.02726	0.01183	0.54689	0.03457	0.03061	0.04231	0.01962	0.01637	0.01861	0.01686	0.01734	0.82911	0.82669	0.01409	0.01108	0.01045	0.04444	0.00916	0.05457	0.03356	0.11963	0.0251	0.10579	0.02547	0.8101	0.17478	0.8201	0.08999	0.01196	0.00281	0.02877	0.82648	0.02922	0.00869	0.03155	0.01946	0.1528	0.81661	0.0453	0.82413	0.28377	0.82671	0.1184	0.09244	0.10414	0.04946	0.80097	0.87537
PP-Com-3	0.01666	0.03012	0.01862	0.55148	0.04456	0.03923	0.05612	0.02826	0.02855	0.02656	0.03508	0.02496	0.87215	0.8694	0.01333	0.01787	0.01945	0.03488	0.02097	0.0763	0.05214	0.0955	0.01981	0.12328	0.0407	0.85586	0.182	0.86614	0.10309	0.00692	0.02007	0.03571	0.86859	0.03963	0.01788	0.04066	0.00624	0.1562	0.85602	0.05967	0.86758	0.29533	0.86727	0.10156	0.09413	0.11063	0.05207	0.84673	0.89258
PP-Com-4	0.02119	0.03128	0.02705	0.53578	0.02023	0.0246	0.03447	0.02709	0.00982	0.0327	0.01149	0.00513	0.75821	0.75815	0.0194	0.01936	0.02401	0.04556	0.00736	0.03622	0.03319	0.10588	0.02926	0.10312	0.01929	0.73707	0.16267	0.74809	0.08987	0.01318	0.0129	0.01544	0.75343	0.03296	0.0152	0.03362	0.01798	0.15217	0.74868	0.03694	0.75604	0.28015	0.76763	0.11724	0.07464	0.0858	0.04156	0.73058	0.88215
PP-Com-5	0.03244	0.03318	0.03061	0.52234	0.01209	0.02163	0.02291	0.03073	0.00929	0.02745	0.00596	0.00458	0.72838	0.7313	0.02476	0.02331	0.02755	0.04578	0.008	0.02207	0.02532	0.11184	0.032	0.08456	0.01152	0.70239	0.15234	0.71282	0.084	0.02283	0.01265	0.01328	0.72455	0.03993	0.0226	0.03154	0.02806	0.14567	0.72138	0.02601	0.72777	0.25859	0.73358	0.10931	0.06251	0.06933	0.03941	0.69237	0.86746
PP-Com-6	0.0141	0.0189	0.01433	0.54536	0.02327	0.01757	0.02791	0.01376	0.00688	0.02336	0.01407	0.0116	0.82884	0.82858	0.00884	0.01157	0.01122	0.0281	0.00806	0.05739	0.02821	0.11053	0.01752	0.09091	0.02049	0.81192	0.16912	0.82193	0.07323	0.00853	0.0112	0.02079	0.82507	0.02074	0.00848	0.02103	0.01323	0.13095	0.81226	0.03722	0.82467	0.2619	0.81964	0.10028	0.07431	0.091	0.02742	0.79767	0.88339
PP-Com-7	0.0106	0.02615	0.01493	0.54693	0.02427	0.02257	0.03205	0.01794	0.00635	0.02406	0.00951	0.01024	0.81266	0.81174	0.01338	0.01228	0.01026	0.04353	0.0049	0.0486	0.0276	0.11946	0.02618	0.09621	0.01798	0.79122	0.16657	0.80189	0.08179	0.01277	0.00345	0.0216	0.8091	0.02492	0.00578	0.02669	0.02249	0.14745	0.8001	0.03839	0.80818	0.27656	0.81181	0.12282	0.08393	0.0975	0.03826	0.78187	0.88147
Inconnu	0.85675	0.82723	0.84563	0.73565	0.74617	0.78504	0.74218	0.83053	0.78257	0.82038	0.76557	0.77181	0.70493	0.72222	0.84028	0.83412	0.83186	0.81095	0.79105	0.71635	0.77407	0.86123	0.82652	0.71336	0.7547	0.67427	0.77535	0.67258	0.76953	0.83459	0.81149	0.76042	0.70203	0.82723	0.82641	0.8017	0.84888	0.82871	0.71711	0.74607	0.71447	0.78108	0.70466	0.82958	0.74647	0.7293	0.79256	0.65475	0.85555
PP-Com-8	0.0464	0.04697	0.04001	0.56242	0.05815	0.05511	0.07033	0.05041	0.04607	0.04497	0.05817	0.0468	0.88553	0.8839	0.02826	0.04638	0.04393	0.03969	0.04861	0.10051	0.0764	0.11016	0.03566	0.13899	0.06106	0.87056	0.20066	0.8811	0.12376	0.03125	0.05221	0.05673	0.88182	0.06564	0.04658	0.06148	0.02497	0.17098	0.86936	0.07739	0.88053	0.29963	0.88269	0.10331	0.10182	0.12827	0.05655	0.86457	0.91213
PP-Com-9	0.02837	0.03654	0.02972	0.55751	0.04791	0.04408	0.06009	0.0378	0.03431	0.03772	0.04253	0.03072	0.86649	0.86532	0.02052	0.02839	0.03077	0.03909	0.03046	0.08348	0.06145	0.09506	0.02782	0.1293	0.04842	0.85068	0.18546	0.86143	0.1106	0.01543	0.03371	0.0414	0.86272	0.04906	0.02885	0.04668	0.01292	0.15751	0.85119	0.06533	0.86251	0.29746	0.86279	0.10465	0.09538	0.11331	0.05214	0.84183	0.90401
PP-Com-10	0.04037	0.04167	0.03023	0.55269	0.05675	0.05423	0.06794	0.04516	0.04826	0.03126	0.0561	0.04442	0.88547	0.88459	0.02355	0.03649	0.03596	0.03516	0.04446	0.09316	0.07301	0.10499	0.02728	0.13413	0.05704	0.87031	0.19715	0.882	0.12323	0.0239	0.04356	0.05501	0.88213	0.06552	0.04259	0.05447	0.0171	0.16042	0.87018	0.07198	0.88123	0.29462	0.87708	0.08993	0.09625	0.11895	0.06022	0.86126	0.90671
PP-Com-11	0.02019	0.03148	0.02243	0.55046	0.04333	0.03909	0.05479	0.03149	0.02836	0.02959	0.03464	0.0232	0.85472	0.85256	0.01582	0.02153	0.02362	0.03646	0.02164	0.07229	0.05245	0.09586	0.02242	0.12225	0.04016	0.83813	0.17989	0.84837	0.10418	0.00945	0.02281	0.03518	0.85143	0.04275	0.02152	0.04236	0.00755	0.15658	0.84041	0.05914	0.85065	0.29392	0.85242	0.10255	0.09089	0.10908	0.05073	0.82949	0.89511
PP-Com-12	0.00465	0.0204	0.00647	0.55528	0.04203	0.03244	0.04821	0.01578	0.02064	0.01591	0.02596	0.02351	0.8796	0.8763	0.00694	0.0073	0.0074	0.03315	0.0136	0.0731	0.041	0.11018	0.01573	0.11363	0.03392	0.86471	0.18448	0.87503	0.09128	0.00476	0.00726	0.03393	0.8763	0.02692	0.00739	0.02917	0.0082	0.14727	0.8627	0.05369	0.8732	0.28923	0.87129	0.10523	0.09596	0.11245	0.04763	0.85414	0.8861
PS-Com-1	0.95981	0.93898	0.95585	0.58175	0.9519	0.94332	0.94297	0.94872	0.9623	0.95025	0.95275	0.96004	1.06617	1.07736	0.95894	0.95196	0.95617	0.94369	0.95955	0.90811	0.94498	0.9861	0.94169	0.9297	0.95275	1.06983	0.833	1.06605	0.91951	0.95589	0.96089	0.95008	1.06799	0.93754	0.95923	0.93072	0.95198	0.89813	1.07743	0.94203	1.08233	0.90107	1.032	0.92727	0.93745	0.92514	0.94101	1.02768	0.93483
PS-Com-2	0.9307	0.89978	0.92347	0.63509	0.91692	0.90554	0.90585	0.91334	0.93081	0.91525	0.91512	0.92706	1.07186	1.08815	0.92583	0.91473	0.92464	0.9091	0.92708	0.88656	0.91017	0.94424	0.90814	0.88943	0.91947	1.07625	0.82481	1.07469	0.8802	0.9235	0.92756	0.91351	1.07712	0.90526	0.92867	0.89209	0.91952	0.8519	1.09106	0.9047	1.09317	0.85821	1.03506	0.88344	0.89354	0.88299	0.90566	1.02669	0.94085
PS-Com-3	0.92893	0.89806	0.92206	0.65833	0.91717	0.90451	0.90487	0.91145	0.92922	0.914	0.91429	0.9261	1.07646	1.09116	0.92458	0.9129	0.92262	0.90736	0.92561	0.88928	0.90871	0.95356	0.90595	0.88881	0.91827	1.07882	0.84147	1.0772	0.87897	0.92245	0.92613	0.91392	1.08022	0.90361	0.92761	0.89128	0.9181	0.85	1.09292	0.90528	1.09843	0.85766	1.03936	0.88213	0.89557	0.88652	0.90586	1.031	0.95102
PS-Com-4	0.91931	0.89032	0.91323	0.60873	0.89631	0.89112	0.88998	0.90247	0.91214	0.90276	0.89808	0.90594	1.0547	1.0752	0.91383	0.90358	0.91272	0.89867	0.90845	0.86617	0.89153	0.94581	0.89464	0.87182	0.8969	1.05416	0.8099	1.05081	0.86665	0.91086	0.91133	0.89312	1.05983	0.8935	0.91195	0.88332	0.90883	0.85131	1.08018	0.8874	1.07793	0.85052	1.02471	0.87939	0.8761	0.86803	0.89517	1.00685	0.9336
PS-Com-5	0.92651	0.9001	0.92086	0.60235	0.912	0.90299	0.90337	0.9113	0.92462	0.91249	0.914	0.92105	1.06373	1.08183	0.92316	0.91381	0.92142	0.90632	0.9207	0.87962	0.90471	0.95648	0.90401	0.88731	0.91201	1.0688	0.81955	1.06462	0.87816	0.91954	0.92426	0.90915	1.06937	0.90078	0.92248	0.89401	0.9156	0.8592	1.08461	0.90159	1.08528	0.86016	1.02819	0.88584	0.89407	0.88244	0.90394	1.01965	0.93479
PS-Com-6	0.93465	0.90809	0.92953	0.66576	0.92714	0.91507	0.91784	0.92115	0.93844	0.92288	0.92492	0.93474	1.09176	1.10834	0.93137	0.92204	0.92973	0.91575	0.93388	0.90233	0.9192	0.9596	0.91436	0.90284	0.92734	1.09684	0.84639	1.09426	0.89113	0.92893	0.93463	0.9232	1.09697	0.91239	0.93399	0.90266	0.92418	0.86513	1.11245	0.91598	1.11474	0.87275	1.05906	0.89357	0.90705	0.89851	0.9153	1.04913	0.96711
PS-Com-7	0.92955	0.90168	0.92381	0.59859	0.90867	0.90331	0.90221	0.91376	0.92393	0.91408	0.91076	0.91871	1.0576	1.07595	0.92484	0.91496	0.92365	0.91053	0.92078	0.87423	0.90409	0.95713	0.90599	0.88663	0.90992	1.05695	0.81527	1.05394	0.88016	0.92239	0.92321	0.90588	1.06128	0.90478	0.92394	0.89404	0.91971	0.86071	1.07994	0.8995	1.07956	0.86184	1.02736	0.89031	0.88991	0.87987	0.90635	1.01137	0.93427
PS-Com-8	0.93737	0.91067	0.93177	0.66293	0.93125	0.91862	0.92189	0.92392	0.94232	0.92522	0.92916	0.93865	1.10116	1.11761	0.93377	0.92496	0.93239	0.91771	0.93757	0.90652	0.92299	0.96222	0.91613	0.90558	0.93095	1.1063	0.84914	1.10382	0.89371	0.93169	0.93796	0.92723	1.10625	0.91537	0.93668	0.90614	0.92647	0.86845	1.121	0.92008	1.12445	0.87416	1.06709	0.89481	0.91025	0.90249	0.91814	1.05771	0.96379
PS-Com-9	0.93616	0.90908	0.93044	0.65723	0.92923	0.91694	0.91984	0.92248	0.94067	0.92352	0.92731	0.93685	1.09979	1.11661	0.93238	0.92338	0.93107	0.91644	0.93592	0.9039	0.9212	0.9609	0.9147	0.90371	0.92918	1.10476	0.84586	1.10226	0.89203	0.93021	0.9364	0.92519	1.10496	0.91393	0.93514	0.90447	0.92506	0.86698	1.11985	0.91808	1.12315	0.87267	1.06596	0.89333	0.90821	0.90015	0.9169	1.05612	0.96013
PS-Com-10	0.92808	0.89631	0.92161	0.61621	0.91504	0.90365	0.9038	0.91002	0.92823	0.91404	0.91173	0.92315	1.06006	1.0722	0.92408	0.91247	0.92301	0.90895	0.92406	0.87632	0.90766	0.91355	0.90579	0.88865	0.91737	1.06238	0.79011	1.06105	0.87741	0.92089	0.92288	0.91007	1.06378	0.90244	0.92635	0.889	0.91754	0.84822	1.07604	0.90348	1.08041	0.85714	1.02391	0.88304	0.88537	0.87557	0.90291	1.01057	0.92814
PS-Com-11	0.93762	0.90895	0.93134	0.64488	0.93037	0.91732	0.91925	0.92199	0.94161	0.92457	0.92757	0.93837	1.09735	1.11202	0.93372	0.92349	0.93219	0.91773	0.93736	0.90154	0.92179	0.96335	0.91553	0.90348	0.93118	1.10079	0.84449	1.09888	0.8915	0.93208	0.93745	0.92664	1.10099	0.91409	0.9374	0.90252	0.92703	0.86177	1.11406	0.91932	1.11956	0.87095	1.06075	0.89336	0.9102	0.90069	0.91753	1.05256	0.95139
LY-01	0.86658	0.85566	0.87531	0.74407	0.68221	0.76911	0.72838	0.84961	0.74436	0.83388	0.71306	0.7058	0.05283	0.04651	0.85481	0.84611	0.86388	0.86972	0.7562	0.56147	0.75007	0.84732	0.86213	0.74813	0.70615	0.01559	0.74348	0.02095	0.82355	0.83816	0.78912	0.70557	0.03782	0.84287	0.82908	0.83019	0.8589	0.88282	0.05476	0.69235	0.05893	0.80491	0.17235	0.86975	0.69154	0.67161	0.79864	0.06216	0.91178
LY-02	0.90777	0.89301	0.91391	0.77379	0.7238	0.81023	0.7678	0.88741	0.78848	0.87255	0.75598	0.75003	0.02725	0.02742	0.89522	0.88393	0.90363	0.90554	0.80044	0.60627	0.79376	0.86708	0.90001	0.78578	0.74848	0.01268	0.76457	0.01379	0.85909	0.87778	0.83243	0.74693	0.02048	0.88283	0.87074	0.86545	0.89822	0.90798	0.06147	0.73152	0.02874	0.83236	0.14365	0.90091	0.7269	0.70224	0.83744	0.04888	0.95346
LY-03	0.93266	0.90652	0.92726	0.61518	0.92423	0.91281	0.91443	0.91881	0.93643	0.92054	0.92347	0.93346	1.09019	1.10509	0.92985	0.92103	0.92778	0.91283	0.93222	0.8932	0.91645	0.9615	0.91159	0.8976	0.92501	1.09416	0.83335	1.09148	0.88662	0.92743	0.93297	0.92058	1.09368	0.90901	0.93181	0.89999	0.9227	0.86236	1.10552	0.91243	1.11124	0.86657	1.05238	0.89142	0.90564	0.8937	0.91127	1.04484	0.93543
LY-04	0.03161	0.02689	0.03093	0.51966	0.03482	0.02716	0.03604	0.02194	0.03017	0.03408	0.02781	0.0318	0.81769	0.82074	0.02993	0.02112	0.02934	0.04324	0.02491	0.07107	0.03317	0.12466	0.02769	0.08566	0.03486	0.80532	0.18388	0.81249	0.06662	0.02367	0.02571	0.02324	0.81348	0.02709	0.02436	0.02504	0.02976	0.10834	0.80182	0.03289	0.8152	0.22766	0.78063	0.08652	0.07501	0.06589	0.03992	0.77338	0.8126
LY-05	0.83261	0.82136	0.83993	0.74056	0.6479	0.73334	0.69248	0.814	0.70935	0.7987	0.67722	0.66986	0.04234	0.04247	0.82087	0.81009	0.82857	0.83543	0.72042	0.52926	0.71484	0.81524	0.82755	0.71373	0.67057	0.01636	0.70779	0.0166	0.78934	0.80316	0.75271	0.67106	0.03641	0.80753	0.79458	0.79477	0.82506	0.85083	0.07644	0.65915	0.04979	0.77717	0.16103	0.84095	0.6598	0.63844	0.76614	0.05227	0.91919
LY-06	0.9532	0.93929	0.94891	0.88003	0.89643	0.92899	0.91174	0.94218	0.92254	0.93338	0.91233	0.92719	0.89305	0.87793	0.94608	0.94028	0.94962	0.9425	0.93177	0.89557	0.92827	0.9063	0.94349	0.9233	0.92182	0.86336	0.91545	0.87198	0.94205	0.94793	0.93491	0.90383	0.8746	0.94809	0.94863	0.93141	0.9516	0.95932	0.85037	0.8965	0.87433	0.94271	0.89899	0.9272	0.91215	0.86591	0.9247	0.87196	0.5531
LY-07	0.86942	0.85456	0.87657	0.76224	0.70401	0.77639	0.73645	0.84786	0.75969	0.84058	0.73381	0.72833	0.03094	0.01991	0.86037	0.84827	0.86631	0.86481	0.77252	0.59068	0.76367	0.8466	0.86103	0.75206	0.72492	0.01296	0.77248	0.01989	0.8184	0.841	0.80202	0.72366	0.01555	0.83944	0.83691	0.8269	0.85967	0.86372	0.01763	0.70462	0.03276	0.79504	0.12975	0.8576	0.69523	0.6801	0.79803	0.04685	0.92767
LY-08	0.75091	0.65034	0.71325	0.74952	0.66483	0.60928	0.5976	0.6523	0.70287	0.68001	0.69974	0.71893	0.8777	0.89906	0.7233	0.70403	0.71359	0.62282	0.70952	0.72123	0.59686	0.78914	0.65119	0.4694	0.65881	0.91994	0.74373	0.88822	0.47766	0.72051	0.7255	0.64611	0.88395	0.61155	0.71389	0.61119	0.71783	0.41887	0.86327	0.58227	0.90144	0.29988	0.61532	0.49661	0.55384	0.48762	0.58635	0.75314	0.65989
LY-09	0.9666	0.94167	0.95617	0.94362	0.92579	0.92643	0.89639	0.94248	0.9305	0.94932	0.92878	0.94205	0.90677	0.89947	0.95556	0.95524	0.94501	0.91835	0.94458	0.92957	0.92796	0.96657	0.94272	0.8713	0.92494	0.88661	0.96706	0.88802	0.89418	0.95847	0.95065	0.93049	0.89034	0.9437	0.95582	0.91873	0.96524	0.90022	0.87094	0.91506	0.90237	0.89055	0.87136	0.92981	0.90991	0.90721	0.91478	0.87325	0.96652
MAG-01	0.27065	0.24253	0.24498	0.65916	0.26266	0.24047	0.22531	0.24154	0.25525	0.24823	0.26528	0.27687	0.90776	0.91139	0.25207	0.25599	0.24418	0.2144	0.26388	0.31009	0.24834	0.3449	0.23872	0.22905	0.25402	0.90429	0.38923	0.90983	0.22477	0.25837	0.26521	0.26803	0.90393	0.24702	0.26131	0.2258	0.25956	0.25539	0.8681	0.24835	0.90282	0.32531	0.8109	0.25431	0.26245	0.27194	0.22264	0.84635	0.8874
MAG-02	0.98062	0.96481	0.97049	0.91345	0.92775	0.95301	0.92801	0.96645	0.95218	0.95861	0.94356	0.95979	0.87305	0.86263	0.97289	0.96823	0.96936	0.95553	0.96229	0.92434	0.9539	0.94141	0.96699	0.92558	0.94656	0.85864	0.92584	0.86449	0.94989	0.97522	0.96404	0.93723	0.86118	0.97014	0.97478	0.94668	0.97935	0.9611	0.84474	0.92106	0.85297	0.93236	0.85118	0.94648	0.93025	0.8891	0.94118	0.84649	0.67272
MAG-04	0.91595	0.84747	0.90638	0.79696	0.73386	0.7584	0.72184	0.8515	0.80226	0.85589	0.77496	0.77291	0.11969	0.14199	0.89805	0.87908	0.89708	0.84574	0.81064	0.65645	0.73838	0.88232	0.85682	0.64851	0.73979	0.16362	0.78297	0.13487	0.71015	0.87618	0.8491	0.74035	0.13308	0.8138	0.86925	0.8084	0.88666	0.70375	0.19323	0.68755	0.1423	0.55744	0.05734	0.76148	0.64306	0.60519	0.76308	0.07715	0.91649
MAG-05	0.9532	0.92557	0.94673	0.52462	0.94041	0.92655	0.92548	0.93574	0.95296	0.93839	0.94356	0.95114	1.05733	1.06955	0.95111	0.94296	0.94757	0.92821	0.95008	0.89238	0.92651	0.9832	0.92819	0.90129	0.94017	1.06382	0.81192	1.05791	0.89226	0.94737	0.95341	0.93766	1.05943	0.92034	0.94999	0.91374	0.94286	0.86848	1.06506	0.92418	1.07426	0.85946	1.00375	0.90158	0.9172	0.90051	0.9221	1.01122	0.89476
MU-01	0.85538	0.8436	0.86406	0.76596	0.67372	0.75636	0.71582	0.83597	0.73434	0.82396	0.70396	0.69601	0.03152	0.03293	0.84525	0.83314	0.85309	0.85828	0.74568	0.55772	0.74028	0.83421	0.8503	0.73586	0.69714	0.01477	0.73351	0.01289	0.80982	0.82578	0.7783	0.69563	0.02914	0.82783	0.8186	0.81682	0.84759	0.86502	0.07684	0.68334	0.03584	0.79222	0.14525	0.86236	0.68154	0.65852	0.7881	0.04581	0.93455
MU-02	0.02387	0.01986	0.02286	0.52972	0.01502	0.01013	0.0171	0.01721	0.00771	0.02246	0.01044	0.00668	0.77468	0.77743	0.0177	0.01654	0.02004	0.02667	0.0052	0.04151	0.01452	0.1101	0.01672	0.06569	0.01027	0.758	0.15975	0.76415	0.05683	0.01247	0.01238	0.01027	0.77137	0.01892	0.01324	0.01929	0.0158	0.11209	0.76128	0.02043	0.77391	0.22104	0.75105	0.08058	0.05324	0.05883	0.02108	0.73276	0.86122
MU-03	0.10668	0.09212	0.09614	0.58238	0.09706	0.08892	0.08299	0.09002	0.08452	0.10652	0.09326	0.09409	0.82337	0.82521	0.09129	0.09218	0.09398	0.08526	0.09337	0.13342	0.10672	0.17008	0.09247	0.13705	0.09863	0.8072	0.23384	0.81991	0.12267	0.09011	0.10086	0.09988	0.81848	0.1004	0.09836	0.082	0.09344	0.16828	0.79832	0.1091	0.8187	0.2963	0.79509	0.15734	0.13147	0.15053	0.08794	0.78255	0.9045
MU-04	0.94002	0.91436	0.93513	0.55201	0.92896	0.92006	0.91978	0.92713	0.94151	0.92811	0.92971	0.93696	1.07059	1.08647	0.93762	0.92974	0.9356	0.92225	0.93769	0.88659	0.92232	0.97376	0.9195	0.9057	0.93014	1.074	0.81681	1.07049	0.89619	0.93453	0.94007	0.92627	1.07415	0.91663	0.93757	0.90869	0.93031	0.87719	1.08473	0.91879	1.09025	0.8782	1.03621	0.9038	0.9132	0.90232	0.92028	1.0284	0.91688
MU-05	0.07565	0.06542	0.05845	0.55033	0.06453	0.06416	0.06368	0.06566	0.05829	0.05789	0.0685	0.06471	0.83605	0.83698	0.05262	0.06764	0.06079	0.04443	0.06411	0.10078	0.07936	0.14716	0.0535	0.11158	0.06345	0.81985	0.20817	0.82881	0.10785	0.05714	0.06844	0.07107	0.83199	0.08008	0.06963	0.0671	0.05454	0.16432	0.81506	0.07643	0.83205	0.26847	0.81262	0.11031	0.09882	0.12153	0.06173	0.79775	0.89484
MU-06	0.95186	0.90958	0.9416	0.65821	0.93858	0.91201	0.91082	0.92228	0.95242	0.93112	0.93827	0.95474	1.08932	1.10165	0.9477	0.9332	0.94081	0.91049	0.94912	0.92042	0.91223	0.9807	0.91494	0.86907	0.93465	1.0999	0.86385	1.09351	0.85944	0.94394	0.95107	0.93162	1.09037	0.90545	0.94906	0.89429	0.9381	0.81365	1.09279	0.9087	1.11169	0.80021	1.00552	0.86105	0.8939	0.87395	0.90341	1.02841	0.91558
MU-07	0.9601	0.91661	0.95157	0.70432	0.95169	0.92182	0.9231	0.93414	0.96239	0.93985	0.95026	0.96365	1.08626	1.09991	0.95679	0.94497	0.95162	0.92089	0.95845	0.93282	0.92272	0.9871	0.92572	0.88278	0.9449	1.09962	0.87834	1.0916	0.87275	0.95342	0.96093	0.94332	1.08887	0.91724	0.95904	0.90891	0.94518	0.82754	1.09248	0.92074	1.11023	0.8109	1.00545	0.86869	0.90426	0.8891	0.91431	1.03055	0.95302
MU-08	0.84801	0.83299	0.85519	0.74469	0.65021	0.73978	0.69635	0.8261	0.71784	0.81176	0.6835	0.67638	0.05665	0.06523	0.83488	0.8229	0.84241	0.84727	0.72907	0.53535	0.71992	0.82467	0.83928	0.7123	0.67517	0.0303	0.70547	0.02738	0.79202	0.81675	0.76405	0.67416	0.05459	0.81751	0.80582	0.80268	0.8395	0.85251	0.11193	0.66158	0.06672	0.77099	0.16842	0.85099	0.66345	0.63259	0.77387	0.05669	0.91347
MU-09	0.93573	0.90891	0.92699	0.46082	0.92572	0.91641	0.91264	0.91768	0.9402	0.92129	0.92783	0.93946	1.14768	1.16332	0.93074	0.92109	0.92727	0.9085	0.93661	0.88986	0.91847	0.97188	0.90871	0.89318	0.92803	1.14355	0.80815	1.14555	0.88235	0.92954	0.93795	0.92278	1.14596	0.90963	0.93207	0.89473	0.92471	0.86587	1.14656	0.91349	1.17026	0.86238	1.10082	0.88701	0.91356	0.89204	0.91212	1.092	0.82952
[truncated: 99 more columns]

## Sheet: PearsonFurthestNeighbor
	LB-1	LB-2	LB-4	LB-5	LB-6	LB-7	LB-8	LB-9	LB-10	LB-11	LB-12	LB-13	LB-14	LB-15	LB-17	LB-20	LB-21	LB-22	LB-23	LB-24	LB-25	LB-26	LB-27	LB-28	LB-29	LB-30	LB-31	LB-32	LB-35	LB-36	LB-37	LB-38	LB-39	LB-40	LB-41	LB-42	LB-43	LB-44	LB-45	LB-46	LB-48	LB-49	LB-50	LB-51	LB-52	LB-53	LB-54	LB-55	LB-56
LB-1	0	0.02361	0.00739	0.56554	0.04533	0.03427	0.05129	0.01702	0.02083	0.02186	0.02746	0.02615	0.89044	0.88709	0.00847	0.00865	0.0056	0.03986	0.01431	0.07989	0.04278	0.11446	0.02083	0.11694	0.03623	0.87673	0.18913	0.88707	0.09173	0.00638	0.0081	0.03694	0.88722	0.02525	0.005	0.03035	0.01186	0.14883	0.87164	0.05639	0.88371	0.29245	0.87877	0.11683	0.10311	0.11782	0.04612	0.86407	0.88774
LB-2	0.02361	0	0.01447	0.53506	0.0378	0.01346	0.02347	0.00889	0.02309	0.01549	0.02718	0.03061	0.86507	0.86721	0.01497	0.01254	0.01735	0.01766	0.0212	0.07716	0.0232	0.11145	0.00915	0.06592	0.03053	0.85909	0.17007	0.8647	0.04738	0.01637	0.02117	0.0306	0.8639	0.01447	0.01861	0.01036	0.01649	0.0824	0.84587	0.03466	0.86296	0.20222	0.81353	0.05854	0.05985	0.0739	0.01931	0.82094	0.86351
LB-4	0.00739	0.01447	0	0.54996	0.03842	0.02553	0.03765	0.01174	0.0193	0.00771	0.02618	0.02693	0.89477	0.89312	0.00322	0.00765	0.00299	0.02051	0.01636	0.0764	0.03502	0.11735	0.00972	0.09519	0.02998	0.88258	0.18726	0.89219	0.07717	0.00745	0.00996	0.03607	0.89233	0.02449	0.00939	0.02106	0.00878	0.12667	0.8745	0.0461	0.88882	0.25827	0.86956	0.08561	0.08473	0.10382	0.03339	0.86353	0.88303
LB-5	0.56554	0.53506	0.54996	0	0.50117	0.52567	0.50681	0.54116	0.53195	0.53	0.50264	0.51951	0.79126	0.78832	0.54825	0.54276	0.55417	0.5369	0.53323	0.44403	0.52028	0.6029	0.52472	0.49983	0.51093	0.7488	0.46935	0.76419	0.51572	0.54444	0.53652	0.50148	0.76916	0.54365	0.54568	0.51753	0.54961	0.56475	0.73839	0.4966	0.79705	0.56489	0.77696	0.52766	0.48707	0.48919	0.53538	0.73203	0.48542
LB-6	0.04533	0.0378	0.03842	0.50117	0	0.0186	0.01738	0.03696	0.01081	0.03024	0.00921	0.0091	0.72003	0.72779	0.03024	0.03466	0.03456	0.04227	0.01501	0.02214	0.02136	0.13308	0.03358	0.0683	0.00616	0.69467	0.15792	0.70249	0.07453	0.03273	0.02399	0.0063	0.71393	0.04182	0.02891	0.03289	0.03747	0.1359	0.7143	0.01113	0.72044	0.22644	0.71105	0.09773	0.04875	0.04651	0.03082	0.67535	0.83512
LB-7	0.03427	0.01346	0.02553	0.52567	0.0186	0	0.0066	0.01344	0.01262	0.02081	0.01564	0.01769	0.78368	0.78917	0.02309	0.02114	0.02389	0.01934	0.01416	0.05191	0.00476	0.12683	0.01413	0.03737	0.01195	0.77511	0.16697	0.77722	0.02924	0.02304	0.02137	0.01389	0.78246	0.0106	0.02058	0.01003	0.0253	0.07121	0.77001	0.01233	0.78571	0.16253	0.72626	0.05437	0.03862	0.04339	0.00781	0.73124	0.84585
LB-8	0.05129	0.02347	0.03765	0.50681	0.01738	0.0066	0	0.02448	0.01748	0.02764	0.01815	0.02328	0.74428	0.75209	0.03497	0.03304	0.03535	0.02478	0.02231	0.04536	0.00928	0.13982	0.02394	0.03166	0.01296	0.73232	0.17096	0.73585	0.03276	0.03655	0.03165	0.01837	0.7423	0.02448	0.03426	0.01586	0.03942	0.07732	0.73063	0.01175	0.74637	0.16067	0.68909	0.05961	0.03502	0.04015	0.01185	0.68816	0.83814
LB-9	0.01702	0.00889	0.01174	0.54116	0.03696	0.01344	0.02448	0	0.01781	0.01799	0.02328	0.02617	0.86022	0.86014	0.01343	0.00821	0.01179	0.02109	0.01575	0.07743	0.02153	0.11783	0.01018	0.06986	0.02843	0.85331	0.17938	0.85947	0.04709	0.01177	0.0149	0.02863	0.85903	0.00934	0.01179	0.00987	0.01693	0.08685	0.8408	0.03581	0.85669	0.21402	0.81428	0.07216	0.06915	0.08053	0.02171	0.8182	0.8597
LB-10	0.02083	0.02309	0.0193	0.53195	0.01081	0.01262	0.01748	0.01781	0	0.02236	0.00485	0.0052	0.77953	0.78145	0.0145	0.01592	0.01586	0.03324	0.0035	0.03716	0.01803	0.12111	0.02187	0.07585	0.00801	0.75745	0.16278	0.76698	0.06764	0.01526	0.00885	0.01174	0.77509	0.02376	0.01089	0.02085	0.02221	0.12914	0.76697	0.02324	0.77705	0.24457	0.77067	0.1015	0.06364	0.07184	0.02555	0.74303	0.86792
LB-11	0.02186	0.01549	0.00771	0.53	0.03024	0.02081	0.02764	0.01799	0.02236	0	0.02566	0.02681	0.85348	0.85565	0.00916	0.01627	0.01129	0.01533	0.01971	0.06154	0.02682	0.12428	0.00853	0.07385	0.02214	0.84161	0.18157	0.84838	0.06882	0.01594	0.01585	0.03099	0.85119	0.03007	0.01924	0.02181	0.01313	0.11492	0.8362	0.03177	0.85032	0.22174	0.8185	0.06206	0.06282	0.07946	0.02737	0.81562	0.87287
LB-12	0.02746	0.02718	0.02618	0.50264	0.00921	0.01564	0.01815	0.02328	0.00485	0.02566	0	0.00463	0.75072	0.75394	0.02132	0.01956	0.0228	0.04223	0.00572	0.02611	0.01937	0.1202	0.02815	0.07663	0.00882	0.72639	0.15255	0.73635	0.07186	0.02098	0.00993	0.00927	0.74608	0.02984	0.01616	0.02404	0.02868	0.13389	0.74307	0.02115	0.74934	0.24645	0.74768	0.1073	0.06131	0.06644	0.0322	0.71231	0.84277
LB-13	0.02615	0.03061	0.02693	0.51951	0.0091	0.01769	0.02328	0.02617	0.0052	0.02681	0.00463	0	0.74555	0.74864	0.0201	0.02082	0.02329	0.04229	0.00425	0.02556	0.02215	0.11451	0.02769	0.0838	0.00844	0.72129	0.15284	0.73005	0.07915	0.01693	0.01032	0.00805	0.74154	0.03224	0.01536	0.03002	0.02319	0.14262	0.74069	0.02361	0.7449	0.25527	0.74863	0.10861	0.06213	0.06841	0.03478	0.71027	0.86542
LB-14	0.89044	0.86507	0.89477	0.79126	0.72003	0.78368	0.74428	0.86022	0.77953	0.85348	0.75072	0.74555	0	0.0069	0.88024	0.86431	0.88548	0.87561	0.79008	0.61096	0.77041	0.8483	0.87312	0.74522	0.73785	0.01819	0.7672	0.01106	0.81274	0.85886	0.82142	0.73603	0.00547	0.84647	0.85466	0.83684	0.87658	0.84546	0.05437	0.71219	0.00451	0.76169	0.0748	0.85262	0.69471	0.67166	0.80526	0.02037	0.96803
LB-15	0.88709	0.86721	0.89312	0.78832	0.72779	0.78917	0.75209	0.86014	0.78145	0.85565	0.75394	0.74864	0.0069	0	0.87955	0.8639	0.88453	0.87847	0.79137	0.61535	0.77689	0.84886	0.87493	0.75782	0.74475	0.0167	0.77448	0.01324	0.82128	0.85767	0.82028	0.74292	0.00515	0.84875	0.85484	0.84063	0.87592	0.85573	0.039	0.72161	0.00747	0.78001	0.08883	0.8602	0.70577	0.68828	0.81097	0.03009	0.95049
LB-17	0.00847	0.01497	0.00322	0.54825	0.03024	0.02309	0.03497	0.01343	0.0145	0.00916	0.02132	0.0201	0.88024	0.87955	0	0.00857	0.00425	0.02029	0.01308	0.06747	0.03365	0.11001	0.00931	0.09685	0.02534	0.86522	0.17952	0.8752	0.08064	0.00578	0.00961	0.02891	0.87685	0.02602	0.00856	0.02219	0.00624	0.13284	0.86223	0.04201	0.87497	0.26332	0.86344	0.08713	0.07946	0.0982	0.03096	0.84994	0.88603
LB-20	0.00865	0.01254	0.00765	0.54276	0.03466	0.02114	0.03304	0.00821	0.01592	0.01627	0.01956	0.02082	0.86431	0.8639	0.00857	0	0.00767	0.02857	0.01128	0.06919	0.03029	0.11007	0.01278	0.09321	0.02851	0.85114	0.17651	0.86127	0.07105	0.00584	0.00823	0.02742	0.86201	0.01755	0.00735	0.01571	0.01134	0.11745	0.84749	0.04228	0.86024	0.25874	0.84402	0.09193	0.08182	0.09306	0.0351	0.83229	0.87128
LB-21	0.0056	0.01735	0.00299	0.55417	0.03456	0.02389	0.03535	0.01179	0.01586	0.01129	0.0228	0.02329	0.88548	0.88453	0.00425	0.00767	0	0.023	0.01262	0.07302	0.03126	0.11895	0.01154	0.0908	0.02551	0.87194	0.18533	0.88124	0.07402	0.00661	0.00767	0.03207	0.88233	0.021	0.00543	0.02087	0.01012	0.12926	0.86385	0.04252	0.87991	0.25849	0.86047	0.09276	0.08334	0.10063	0.03163	0.8518	0.88302
LB-22	0.03986	0.01766	0.02051	0.5369	0.04227	0.01934	0.02478	0.02109	0.03324	0.01533	0.04223	0.04229	0.87561	0.87847	0.02029	0.02857	0.023	0	0.03422	0.08914	0.02836	0.12807	0.00788	0.05159	0.0328	0.87157	0.19556	0.87488	0.04398	0.02484	0.036	0.04161	0.87404	0.02625	0.03295	0.01968	0.01915	0.08395	0.84995	0.03629	0.87374	0.17864	0.80748	0.03779	0.05432	0.07316	0.01591	0.82613	0.86517
LB-23	0.01431	0.0212	0.01636	0.53323	0.01501	0.01416	0.02231	0.01575	0.0035	0.01971	0.00572	0.00425	0.79008	0.79137	0.01308	0.01128	0.01262	0.03422	0	0.0387	0.01762	0.11457	0.01905	0.07906	0.00925	0.76999	0.16024	0.77833	0.06811	0.00948	0.00407	0.01116	0.78649	0.02013	0.00625	0.02132	0.01604	0.13004	0.77911	0.02517	0.78798	0.24848	0.78004	0.10016	0.06672	0.073	0.02969	0.75394	0.86563
LB-24	0.07989	0.07716	0.0764	0.44403	0.02214	0.05191	0.04536	0.07743	0.03716	0.06154	0.02611	0.02556	0.61096	0.61535	0.06747	0.06919	0.07302	0.08914	0.0387	0	0.05135	0.15114	0.07464	0.10392	0.0273	0.57733	0.14566	0.58889	0.11996	0.0667	0.0472	0.02963	0.60224	0.08415	0.06382	0.0706	0.0724	0.18785	0.60652	0.03633	0.61302	0.26957	0.63208	0.14327	0.06996	0.07003	0.07226	0.57298	0.82635
LB-25	0.04278	0.0232	0.03502	0.52028	0.02136	0.00476	0.00928	0.02153	0.01803	0.02682	0.01937	0.02215	0.77041	0.77689	0.03365	0.03029	0.03126	0.02836	0.01762	0.05135	0	0.14262	0.022	0.03192	0.01163	0.76024	0.1695	0.75978	0.02669	0.0328	0.02569	0.01598	0.76841	0.01391	0.02593	0.01661	0.0361	0.07463	0.75493	0.01073	0.77377	0.15143	0.70725	0.05767	0.03931	0.039	0.01245	0.7125	0.83085
LB-26	0.11446	0.11145	0.11735	0.6029	0.13308	0.12683	0.13982	0.11783	0.12111	0.12428	0.1202	0.11451	0.8483	0.84886	0.11001	0.11007	0.11895	0.12807	0.11457	0.15114	0.14262	0	0.11523	0.20426	0.13441	0.84411	0.10036	0.85257	0.17792	0.1009	0.10874	0.11722	0.85144	0.12885	0.11397	0.12099	0.1005	0.22223	0.85219	0.14498	0.84257	0.36168	0.84745	0.18612	0.13549	0.15027	0.12943	0.8124	0.92509
LB-27	0.02083	0.00915	0.00972	0.52472	0.03358	0.01413	0.02394	0.01018	0.02187	0.00853	0.02815	0.02769	0.87312	0.87493	0.00931	0.01278	0.01154	0.00788	0.01905	0.07464	0.022	0.11523	0	0.06244	0.02457	0.86564	0.18222	0.87077	0.04871	0.01083	0.01867	0.0279	0.87074	0.01616	0.01596	0.0132	0.00823	0.09112	0.85165	0.03112	0.87106	0.19991	0.8201	0.04997	0.05649	0.07153	0.01775	0.8278	0.85988
LB-28	0.11694	0.06592	0.09519	0.49983	0.0683	0.03737	0.03166	0.06986	0.07585	0.07385	0.07663	0.0838	0.74522	0.75782	0.09685	0.09321	0.0908	0.05159	0.07906	0.10392	0.03192	0.20426	0.06244	0	0.0535	0.74758	0.21594	0.73958	0.01411	0.09668	0.09276	0.06528	0.74614	0.05244	0.09072	0.05044	0.09661	0.04661	0.72655	0.03744	0.75386	0.07022	0.61687	0.04671	0.03942	0.03854	0.03284	0.66035	0.78635
LB-29	0.03623	0.03053	0.02998	0.51093	0.00616	0.01195	0.01296	0.02843	0.00801	0.02214	0.00882	0.00844	0.73785	0.74475	0.02534	0.02851	0.02551	0.0328	0.00925	0.0273	0.01163	0.13441	0.02457	0.0535	0	0.71811	0.1606	0.72366	0.05802	0.02627	0.01698	0.00852	0.73361	0.0296	0.02082	0.02541	0.03028	0.12114	0.72955	0.01004	0.73946	0.20476	0.71357	0.08399	0.04405	0.04701	0.02259	0.69104	0.84839
LB-30	0.87673	0.85909	0.88258	0.7488	0.69467	0.77511	0.73232	0.85331	0.75745	0.84161	0.72639	0.72129	0.01819	0.0167	0.86522	0.85114	0.87194	0.87157	0.76999	0.57733	0.76024	0.84411	0.86564	0.74758	0.71811	0	0.753	0.00498	0.82128	0.84571	0.80159	0.71628	0.00932	0.84594	0.83962	0.82902	0.86547	0.86758	0.03709	0.69844	0.02172	0.79367	0.12192	0.86324	0.69075	0.66816	0.80284	0.03253	0.92826
LB-31	0.18913	0.17007	0.18726	0.46935	0.15792	0.16697	0.17096	0.17938	0.16278	0.18157	0.15255	0.15284	0.7672	0.77448	0.17952	0.17651	0.18533	0.19556	0.16024	0.14566	0.1695	0.10036	0.18222	0.21594	0.1606	0.753	0	0.75492	0.20752	0.17463	0.16209	0.15121	0.76939	0.18224	0.17285	0.17026	0.18161	0.26354	0.7862	0.16712	0.7659	0.35535	0.77044	0.24323	0.15034	0.15645	0.17545	0.71578	0.84891
LB-32	0.88707	0.8647	0.89219	0.76419	0.70249	0.77722	0.73585	0.85947	0.76698	0.84838	0.73635	0.73005	0.01106	0.01324	0.8752	0.86127	0.88124	0.87488	0.77833	0.58889	0.75978	0.85257	0.87077	0.73958	0.72366	0.00498	0.75492	0	0.81304	0.85516	0.81151	0.72185	0.00737	0.84653	0.84819	0.83495	0.87402	0.85717	0.04552	0.70009	0.01626	0.76777	0.09767	0.85704	0.6884	0.66292	0.80256	0.02137	0.93252
LB-35	0.09173	0.04738	0.07717	0.51572	0.07453	0.02924	0.03276	0.04709	0.06764	0.06882	0.07186	0.07915	0.81274	0.82128	0.08064	0.07105	0.07402	0.04398	0.06811	0.11996	0.02669	0.17792	0.04871	0.01411	0.05802	0.82128	0.20752	0.81304	0	0.07602	0.0785	0.06123	0.81483	0.02766	0.07097	0.03465	0.07801	0.02941	0.79066	0.04306	0.81961	0.0821	0.68168	0.04475	0.0496	0.04881	0.02577	0.73233	0.79332
LB-36	0.00638	0.01637	0.00745	0.54444	0.03273	0.02304	0.03655	0.01177	0.01526	0.01594	0.02098	0.01693	0.85886	0.85767	0.00578	0.00584	0.00661	0.02484	0.00948	0.0667	0.0328	0.1009	0.01083	0.09668	0.02627	0.84571	0.17463	0.85516	0.07602	0	0.00803	0.0249	0.8562	0.02023	0.00565	0.02193	0.00421	0.12972	0.84222	0.04211	0.85452	0.26463	0.84202	0.09113	0.07976	0.0933	0.03447	0.82759	0.87917
LB-37	0.0081	0.02117	0.00996	0.53652	0.02399	0.02137	0.03165	0.0149	0.00885	0.01585	0.00993	0.01032	0.82142	0.82028	0.00961	0.00823	0.00767	0.036	0.00407	0.0472	0.02569	0.10874	0.01867	0.09276	0.01698	0.80159	0.16209	0.81151	0.0785	0.00803	0	0.01907	0.81769	0.02332	0.00473	0.02315	0.01472	0.14071	0.80784	0.03486	0.81674	0.2679	0.81559	0.10731	0.07808	0.08878	0.03741	0.78898	0.86937
LB-38	0.03694	0.0306	0.03607	0.50148	0.0063	0.01389	0.01837	0.02863	0.01174	0.03099	0.00927	0.00805	0.73603	0.74292	0.02891	0.02742	0.03207	0.04161	0.01116	0.02963	0.01598	0.11722	0.0279	0.06528	0.00852	0.71628	0.15121	0.72185	0.06123	0.0249	0.01907	0	0.73124	0.02797	0.02135	0.02679	0.0306	0.11951	0.73052	0.01055	0.73741	0.21376	0.71643	0.09026	0.04713	0.03955	0.0284	0.68904	0.82327
LB-39	0.88722	0.8639	0.89233	0.76916	0.71393	0.78246	0.7423	0.85903	0.77509	0.85119	0.74608	0.74154	0.00547	0.00515	0.87685	0.86201	0.88233	0.87404	0.78649	0.60224	0.76841	0.85144	0.87074	0.74614	0.73361	0.00932	0.76939	0.00737	0.81483	0.8562	0.81769	0.73124	0	0.84651	0.85141	0.83435	0.87378	0.85098	0.03329	0.70749	0.00839	0.76926	0.08548	0.85257	0.69294	0.67017	0.80424	0.02167	0.93626
LB-40	0.02525	0.01447	0.02449	0.54365	0.04182	0.0106	0.02448	0.00934	0.02376	0.03007	0.02984	0.03224	0.84647	0.84875	0.02602	0.01755	0.021	0.02625	0.02013	0.08415	0.01391	0.12885	0.01616	0.05244	0.0296	0.84594	0.18224	0.84653	0.02766	0.02023	0.02332	0.02797	0.84651	0	0.01579	0.01218	0.02554	0.06947	0.82792	0.0313	0.8466	0.17534	0.77738	0.06615	0.06182	0.0662	0.01735	0.79538	0.84554
LB-41	0.005	0.01861	0.00939	0.54568	0.02891	0.02058	0.03426	0.01179	0.01089	0.01924	0.01616	0.01536	0.85466	0.85484	0.00856	0.00735	0.00543	0.03295	0.00625	0.06382	0.02593	0.11397	0.01596	0.09072	0.02082	0.83962	0.17285	0.84819	0.07097	0.00565	0.00473	0.02135	0.85141	0.01579	0	0.02111	0.01271	0.13065	0.83872	0.03742	0.85034	0.25927	0.83589	0.10323	0.08104	0.09064	0.03303	0.82017	0.87112
LB-42	0.03035	0.01036	0.02106	0.51753	0.03289	0.01003	0.01586	0.00987	0.02085	0.02181	0.02404	0.03002	0.83684	0.84063	0.02219	0.01571	0.02087	0.01968	0.02132	0.0706	0.01661	0.12099	0.0132	0.05044	0.02541	0.82902	0.17026	0.83495	0.03465	0.02193	0.02315	0.02679	0.83435	0.01218	0.02111	0	0.02506	0.06865	0.81598	0.0274	0.83552	0.183	0.77647	0.05938	0.05353	0.06093	0.01604	0.78519	0.8429
LB-43	0.01186	0.01649	0.00878	0.54961	0.03747	0.0253	0.03942	0.01693	0.02221	0.01313	0.02868	0.02319	0.87658	0.87592	0.00624	0.01134	0.01012	0.01915	0.01604	0.0724	0.0361	0.1005	0.00823	0.09661	0.03028	0.86547	0.18161	0.87402	0.07801	0.00421	0.01472	0.0306	0.87378	0.02554	0.01271	0.02506	0	0.1262	0.85779	0.04503	0.87293	0.25501	0.85226	0.07619	0.07653	0.09333	0.03372	0.84461	0.88758
LB-44	0.14883	0.0824	0.12667	0.56475	0.1359	0.07121	0.07732	0.08685	0.12914	0.11492	0.13389	0.14262	0.84546	0.85573	0.13284	0.11745	0.12926	0.08395	0.13004	0.18785	0.07463	0.22223	0.09112	0.04661	0.12114	0.86758	0.26354	0.85717	0.02941	0.12972	0.14071	0.11951	0.85098	0.06947	0.13065	0.06865	0.1262	0	0.82543	0.09281	0.85499	0.06567	0.67795	0.0513	0.08535	0.08201	0.06382	0.7618	0.81476
LB-45	0.87164	0.84587	0.8745	0.73839	0.7143	0.77001	0.73063	0.8408	0.76697	0.8362	0.74307	0.74069	0.05437	0.039	0.86223	0.84749	0.86385	0.84995	0.77911	0.60652	0.75493	0.85219	0.85165	0.72655	0.72955	0.03709	0.7862	0.04552	0.79066	0.84222	0.80784	0.73052	0.03329	0.82792	0.83872	0.81598	0.85779	0.82543	0	0.69994	0.05536	0.7453	0.11447	0.82001	0.68211	0.66961	0.78531	0.06007	0.89947
LB-46	0.05639	0.03466	0.0461	0.4966	0.01113	0.01233	0.01175	0.03581	0.02324	0.03177	0.02115	0.02361	0.71219	0.72161	0.04201	0.04228	0.04252	0.03629	0.02517	0.03633	0.01073	0.14498	0.03112	0.03744	0.01004	0.69844	0.16712	0.70009	0.04306	0.04211	0.03486	0.01055	0.70749	0.0313	0.03742	0.0274	0.04503	0.09281	0.69994	0	0.71593	0.15585	0.65999	0.06118	0.03027	0.02187	0.01834	0.65366	0.81302
LB-48	0.88371	0.86296	0.88882	0.79705	0.72044	0.78571	0.74637	0.85669	0.77705	0.85032	0.74934	0.7449	0.00451	0.00747	0.87497	0.86024	0.87991	0.87374	0.78798	0.61302	0.77377	0.84257	0.87106	0.75386	0.73946	0.02172	0.7659	0.01626	0.81961	0.85452	0.81674	0.73741	0.00839	0.8466	0.85034	0.83552	0.87293	0.85499	0.05536	0.71593	0	0.78225	0.08557	0.85978	0.70146	0.68079	0.80659	0.03067	0.97359
LB-49	0.29245	0.20222	0.25827	0.56489	0.22644	0.16253	0.16067	0.21402	0.24457	0.22174	0.24645	0.25527	0.76169	0.78001	0.26332	0.25874	0.25849	0.17864	0.24848	0.26957	0.15143	0.36168	0.19991	0.07022	0.20476	0.79367	0.35535	0.76777	0.0821	0.26463	0.2679	0.21376	0.76926	0.17534	0.25927	0.183	0.25501	0.06567	0.7453	0.15585	0.78225	0	0.53518	0.08963	0.12835	0.11307	0.14202	0.65007	0.76742
LB-50	0.87877	0.81353	0.86956	0.77696	0.71105	0.72626	0.68909	0.81428	0.77067	0.8185	0.74768	0.74863	0.0748	0.08883	0.86344	0.84402	0.86047	0.80748	0.78004	0.63208	0.70725	0.84745	0.8201	0.61687	0.71357	0.12192	0.77044	0.09767	0.68168	0.84202	0.81559	0.71643	0.08548	0.77738	0.83589	0.77647	0.85226	0.67795	0.11447	0.65999	0.08557	0.53518	0	0.72029	0.6168	0.58375	0.7276	0.04333	0.9038
LB-51	0.11683	0.05854	0.08561	0.52766	0.09773	0.05437	0.05961	0.07216	0.1015	0.06206	0.1073	0.10861	0.85262	0.8602	0.08713	0.09193	0.09276	0.03779	0.10016	0.14327	0.05767	0.18612	0.04997	0.04671	0.08399	0.86324	0.24323	0.85704	0.04475	0.09113	0.10731	0.09026	0.85257	0.06615	0.10323	0.05938	0.07619	0.0513	0.82001	0.06118	0.85978	0.08963	0.72029	0	0.05763	0.06365	0.0434	0.78257	0.82035
LB-52	0.10311	0.05985	0.08473	0.48707	0.04875	0.03862	0.03502	0.06915	0.06364	0.06282	0.06131	0.06213	0.69471	0.70577	0.07946	0.08182	0.08334	0.05432	0.06672	0.06996	0.03931	0.13549	0.05649	0.03942	0.04405	0.69075	0.15034	0.6884	0.0496	0.07976	0.07808	0.04713	0.69294	0.06182	0.08104	0.05353	0.07653	0.08535	0.68211	0.03027	0.70146	0.12835	0.6168	0.05763	0	0.02847	0.03593	0.62423	0.82761
LB-53	0.11782	0.0739	0.10382	0.48919	0.04651	0.04339	0.04015	0.08053	0.07184	0.07946	0.06644	0.06841	0.67166	0.68828	0.0982	0.09306	0.10063	0.07316	0.073	0.07003	0.039	0.15027	0.07153	0.03854	0.04701	0.66816	0.15645	0.66292	0.04881	0.0933	0.08878	0.03955	0.67017	0.0662	0.09064	0.06093	0.09333	0.08201	0.66961	0.02187	0.68079	0.11307	0.58375	0.06365	0.02847	0	0.04575	0.59289	0.77846
LB-54	0.04612	0.01931	0.03339	0.53538	0.03082	0.00781	0.01185	0.02171	0.02555	0.02737	0.0322	0.03478	0.80526	0.81097	0.03096	0.0351	0.03163	0.01591	0.02969	0.07226	0.01245	0.12943	0.01775	0.03284	0.02259	0.80284	0.17545	0.80256	0.02577	0.03447	0.03741	0.0284	0.80424	0.01735	0.03303	0.01604	0.03372	0.06382	0.78531	0.01834	0.80659	0.14202	0.7276	0.0434	0.03593	0.04575	0	0.7462	0.85342
LB-55	0.86407	0.82094	0.86353	0.73203	0.67535	0.73124	0.68816	0.8182	0.74303	0.81562	0.71231	0.71027	0.02037	0.03009	0.84994	0.83229	0.8518	0.82613	0.75394	0.57298	0.7125	0.8124	0.8278	0.66035	0.69104	0.03253	0.71578	0.02137	0.73233	0.82759	0.78898	0.68904	0.02167	0.79538	0.82017	0.78519	0.84461	0.7618	0.06007	0.65366	0.03067	0.65007	0.04333	0.78257	0.62423	0.59289	0.7462	0	0.8923
LB-56	0.88774	0.86351	0.88303	0.48542	0.83512	0.84585	0.83814	0.8597	0.86792	0.87287	0.84277	0.86542	0.96803	0.95049	0.88603	0.87128	0.88302	0.86517	0.86563	0.82635	0.83085	0.92509	0.85988	0.78635	0.84839	0.92826	0.84891	0.93252	0.79332	0.87917	0.86937	0.82327	0.93626	0.84554	0.87112	0.8429	0.88758	0.81476	0.89947	0.81302	0.97359	0.76742	0.9038	0.82035	0.82761	0.77846	0.85342	0.8923	0
LB-57	0.03016	0.01305	0.02076	0.53122	0.02287	0.00342	0.01021	0.01303	0.01604	0.01569	0.02048	0.02162	0.80448	0.80933	0.01998	0.02009	0.01853	0.01431	0.01552	0.0586	0.00582	0.12382	0.01009	0.03768	0.01348	0.798	0.16854	0.79973	0.02937	0.02042	0.02034	0.01823	0.80318	0.00994	0.01862	0.01049	0.02085	0.07282	0.78513	0.01387	0.80508	0.16128	0.74123	0.04764	0.03812	0.04556	0.00658	0.75155	0.85109
LB-58	0.08056	0.05187	0.07305	0.49737	0.02119	0.01989	0.01847	0.05222	0.03093	0.05925	0.03077	0.03097	0.67609	0.68713	0.06414	0.06316	0.06704	0.05324	0.03635	0.04414	0.01882	0.15084	0.05045	0.03856	0.01898	0.66389	0.16112	0.66281	0.04433	0.06106	0.05465	0.01986	0.67352	0.04208	0.05543	0.04142	0.06471	0.09554	0.67159	0.01277	0.68271	0.14958	0.62347	0.07598	0.03036	0.02472	0.0252	0.61456	0.82349
LB-59	0.86348	0.83791	0.86732	0.7431	0.67719	0.7523	0.70831	0.8328	0.74178	0.82485	0.71051	0.70699	0.01457	0.01722	0.85069	0.83479	0.85616	0.84842	0.75404	0.56603	0.73613	0.82162	0.84547	0.71309	0.70021	0.00686	0.72905	0.00536	0.78667	0.83041	0.7867	0.69703	0.01067	0.82115	0.82376	0.80619	0.85073	0.83138	0.04612	0.67573	0.01825	0.7495	0.09791	0.83478	0.66449	0.63644	0.77639	0.01926	0.90487
LB-60	0.08629	0.09013	0.08782	0.54936	0.09346	0.07987	0.08497	0.07063	0.07128	0.09928	0.06996	0.07579	0.78311	0.78036	0.09205	0.07494	0.08362	0.11442	0.0666	0.11043	0.07474	0.21332	0.09718	0.12981	0.08192	0.7663	0.22029	0.77064	0.10819	0.08633	0.06768	0.08598	0.78277	0.07135	0.07499	0.08051	0.10299	0.17283	0.77227	0.09879	0.7805	0.28775	0.76905	0.18149	0.14443	0.14975	0.10482	0.74566	0.81129
LB-61	0.0208	0.01972	0.01909	0.53179	0.01187	0.01034	0.01731	0.01675	0.00399	0.02009	0.00626	0.00744	0.79052	0.79418	0.01392	0.01609	0.01516	0.03142	0.00539	0.03902	0.01463	0.12037	0.01935	0.0713	0.00833	0.77207	0.16104	0.77981	0.06207	0.0161	0.00917	0.01024	0.78678	0.02003	0.01049	0.01837	0.02094	0.1205	0.77938	0.01922	0.7891	0.22867	0.77324	0.09125	0.05847	0.06503	0.02099	0.75084	0.86321
LB-62	0.01755	0.01814	0.01475	0.53938	0.03954	0.02916	0.04021	0.01612	0.02325	0.02203	0.02567	0.02258	0.84685	0.84455	0.01365	0.00817	0.01758	0.03172	0.0171	0.06818	0.0413	0.09931	0.01695	0.10507	0.03591	0.83152	0.17467	0.84369	0.08429	0.00824	0.01529	0.03197	0.84401	0.03049	0.01762	0.02371	0.01049	0.12618	0.8301	0.05013	0.84288	0.27337	0.83603	0.09206	0.08397	0.0973	0.04399	0.81754	0.87835
LB-63	0.11084	0.05886	0.09677	0.53793	0.08445	0.03893	0.04585	0.06533	0.08579	0.08094	0.08756	0.09341	0.78306	0.7948	0.09864	0.08868	0.0946	0.06125	0.08424	0.12454	0.03375	0.17498	0.06257	0.02381	0.06915	0.79693	0.19943	0.78535	0.01335	0.09394	0.09602	0.0685	0.78603	0.04107	0.08876	0.04899	0.09227	0.02939	0.767	0.04412	0.7927	0.06404	0.64091	0.03697	0.04546	0.03472	0.0339	0.69971	0.80482
LB-64	0.03269	0.01712	0.02831	0.51456	0.01734	0.0049	0.01146	0.01534	0.01391	0.02544	0.01533	0.01653	0.78381	0.78999	0.0256	0.02142	0.02504	0.02473	0.0126	0.05048	0.00651	0.1139	0.0162	0.0437	0.01199	0.77372	0.15191	0.77584	0.03253	0.02115	0.0196	0.00903	0.7815	0.0104	0.01779	0.01295	0.02554	0.08256	0.77155	0.01067	0.78493	0.17394	0.73144	0.0628	0.03924	0.03706	0.01228	0.72868	0.83242
LB-65	0.00938	0.01133	0.00792	0.54549	0.03132	0.01314	0.02579	0.00584	0.01338	0.01436	0.01914	0.02035	0.8598	0.86048	0.00948	0.00576	0.00566	0.02177	0.00952	0.07018	0.01852	0.11772	0.00917	0.0719	0.02136	0.85027	0.1771	0.85683	0.05221	0.00737	0.00809	0.02335	0.8576	0.00861	0.00456	0.01173	0.01238	0.10138	0.83965	0.03181	0.85641	0.22398	0.82053	0.07839	0.06943	0.07919	0.02288	0.81973	0.864
LB-66	0.01386	0.01505	0.01368	0.54384	0.03105	0.01477	0.02724	0.00816	0.0133	0.02326	0.01892	0.02028	0.84835	0.84897	0.01396	0.00858	0.01053	0.02954	0.01111	0.07036	0.02173	0.11982	0.01566	0.07702	0.02388	0.83697	0.17535	0.84438	0.05601	0.01101	0.01202	0.02362	0.8458	0.01104	0.00677	0.01412	0.01857	0.10283	0.82979	0.03411	0.84513	0.23035	0.81377	0.08838	0.07316	0.08091	0.02555	0.80905	0.85997
LB-67	0.03761	0.01438	0.02556	0.52676	0.03219	0.00982	0.01175	0.01437	0.02359	0.02343	0.02839	0.03285	0.82781	0.83381	0.0275	0.02216	0.02398	0.01567	0.02416	0.07378	0.01396	0.13079	0.01392	0.03895	0.0232	0.82122	0.17841	0.82497	0.02738	0.02605	0.02864	0.02712	0.82654	0.01372	0.02538	0.00929	0.0293	0.06834	0.80695	0.02283	0.82784	0.16688	0.75857	0.05308	0.04832	0.05395	0.01189	0.77039	0.84401
LB-68	0.06591	0.05685	0.05851	0.43174	0.02248	0.04295	0.03864	0.06044	0.03482	0.04686	0.02617	0.02418	0.68738	0.69098	0.05071	0.05292	0.05791	0.06264	0.03394	0.01278	0.0468	0.11251	0.05284	0.09512	0.02796	0.65903	0.12447	0.66954	0.10246	0.04822	0.04036	0.02641	0.67999	0.06949	0.05341	0.05338	0.04995	0.16189	0.6807	0.03437	0.68937	0.25689	0.69132	0.11417	0.05986	0.06193	0.05747	0.64306	0.81605
PP-1	0.00472	0.02558	0.00653	0.55746	0.04257	0.03541	0.05121	0.02005	0.02163	0.01742	0.02784	0.02651	0.89098	0.88858	0.00773	0.011	0.00603	0.0386	0.016	0.07623	0.04288	0.12658	0.02059	0.11572	0.03392	0.87485	0.19349	0.88623	0.09584	0.00941	0.00976	0.03809	0.8872	0.0307	0.00779	0.03206	0.01306	0.1519	0.87234	0.05496	0.88506	0.29151	0.88306	0.11229	0.10216	0.11847	0.04855	0.86654	0.88436
PS-1'	0.93116	0.90131	0.92451	0.66247	0.91428	0.90602	0.90726	0.91419	0.9296	0.91683	0.91397	0.92439	1.0775	1.09709	0.92626	0.91417	0.92424	0.91131	0.92587	0.89057	0.91093	0.95617	0.90862	0.8917	0.91669	1.07988	0.84394	1.07894	0.88338	0.92372	0.92784	0.91187	1.08236	0.90686	0.92772	0.89466	0.92038	0.85664	1.10048	0.9039	1.10226	0.86391	1.04639	0.88826	0.89586	0.88438	0.90905	1.03199	0.95897
PS-1	0.94124	0.91111	0.93495	0.65786	0.937	0.92089	0.92218	0.9235	0.94563	0.9297	0.93196	0.94494	1.10867	1.1187	0.93872	0.92597	0.93616	0.92127	0.94253	0.90945	0.92627	0.96762	0.92003	0.90782	0.93774	1.10843	0.85155	1.10876	0.89459	0.93675	0.94212	0.93348	1.10844	0.91704	0.943	0.90313	0.9324	0.85727	1.11605	0.92386	1.12877	0.87409	1.07059	0.89585	0.91656	0.90626	0.92055	1.0643	0.94266
PVC-1	1.0092	0.9835	1.00248	0.94257	0.9957	0.99609	0.98212	0.99146	1.00345	1.00367	0.98916	1.00611	0.96715	0.96939	1.00421	0.98925	1.006	1.00545	1.0072	0.98507	1.00088	0.96205	0.99665	0.98599	1.00778	0.96918	0.93468	0.97629	0.98218	1.00348	1.00148	0.9964	0.9678	1.00259	1.01018	0.96502	1.00922	0.9434	0.97648	0.99234	0.96813	0.96597	0.94254	0.97822	0.96715	0.96428	0.99573	0.94773	0.98813
PE-1	0.83871	0.82671	0.84686	0.72244	0.6548	0.74135	0.70188	0.81972	0.7179	0.80678	0.68433	0.67933	0.07114	0.06398	0.82747	0.81534	0.83603	0.84454	0.72886	0.53485	0.72353	0.82643	0.83507	0.72271	0.68092	0.03236	0.72248	0.03792	0.79505	0.80979	0.76085	0.67656	0.05489	0.81327	0.8014	0.8004	0.83149	0.85507	0.07678	0.66502	0.07976	0.78574	0.18895	0.84564	0.67128	0.64403	0.77588	0.07625	0.8505
PET-1	0.97664	0.97262	0.97782	0.90008	0.91277	0.95415	0.93887	0.96937	0.94076	0.96617	0.92746	0.94178	0.84571	0.82893	0.97557	0.96693	0.97796	0.98376	0.94796	0.89572	0.94978	0.9329	0.97796	0.95298	0.93816	0.81163	0.91526	0.82035	0.9736	0.97397	0.95265	0.91798	0.82626	0.97411	0.96907	0.96116	0.98183	0.98798	0.81554	0.91504	0.82779	0.96636	0.86078	0.97441	0.93758	0.87817	0.95942	0.82299	0.58586
PE-1'	0.86446	0.85366	0.87279	0.75081	0.68176	0.76854	0.72814	0.84698	0.7446	0.83218	0.71225	0.70531	0.03259	0.03156	0.8538	0.84249	0.86174	0.86969	0.75571	0.56043	0.75144	0.8423	0.86099	0.74976	0.70584	0.01028	0.73616	0.01217	0.82303	0.83585	0.78732	0.70452	0.02447	0.84022	0.82738	0.82747	0.85721	0.88022	0.06237	0.6916	0.03817	0.807	0.15264	0.87161	0.69011	0.66903	0.80025	0.04788	0.92373
PVC-1'	1.01399	0.98875	1.0075	0.95357	1.00308	1.00234	0.98846	0.99602	1.00974	1.00943	0.99558	1.01231	0.97629	0.97825	1.00923	0.99409	1.01169	1.01176	1.01312	0.99385	1.00737	0.96882	1.00314	0.99443	1.01498	0.97805	0.94284	0.98549	0.98862	1.00943	1.00739	1.00328	0.97664	1.00852	1.01535	0.97113	1.01486	0.94687	0.98413	1.00041	0.97756	0.97393	0.95268	0.98597	0.97532	0.97252	1.00179	0.95773	0.99441
PU	0.83363	0.7567	0.79978	0.56486	0.74257	0.73412	0.7014	0.75835	0.76883	0.77576	0.75462	0.77616	0.83627	0.85967	0.8018	0.78848	0.80483	0.74097	0.78195	0.76017	0.72592	0.80917	0.74775	0.62836	0.7398	0.84068	0.75907	0.83362	0.66028	0.79861	0.79648	0.74004	0.83958	0.75521	0.79533	0.72851	0.80627	0.66385	0.84223	0.71089	0.84486	0.59157	0.72047	0.68456	0.65399	0.65689	0.72429	0.75724	0.70987
ABS	0.92141	0.89427	0.91224	0.45565	0.90921	0.90329	0.89831	0.90515	0.92368	0.9053	0.90976	0.9203	1.11714	1.13045	0.91526	0.90583	0.91429	0.89834	0.92026	0.86143	0.90703	0.95233	0.8955	0.88504	0.91282	1.10943	0.79111	1.11386	0.87658	0.91449	0.92059	0.90799	1.11562	0.89996	0.91821	0.881	0.90918	0.86083	1.11787	0.90209	1.13863	0.86172	1.08016	0.87854	0.89852	0.88432	0.9019	1.0636	0.83868
PA66	0.94775	0.9234	0.93819	0.91907	0.90024	0.90807	0.87484	0.92246	0.90592	0.93209	0.90229	0.91633	0.90844	0.90324	0.9355	0.93279	0.92556	0.90266	0.92166	0.90491	0.91084	0.93562	0.92616	0.85492	0.90389	0.88019	0.92661	0.88447	0.8826	0.93844	0.92829	0.90803	0.89338	0.92881	0.93476	0.89892	0.95013	0.89072	0.87768	0.89856	0.90335	0.89802	0.88732	0.92918	0.89192	0.89343	0.89903	0.87356	0.96279
PC	1.05848	1.06498	1.06994	1.04684	1.06236	1.06654	1.06916	1.06244	1.06705	1.06825	1.06355	1.06155	1.01823	1.02064	1.06793	1.05607	1.06629	1.07697	1.05876	1.06601	1.06495	1.07124	1.06847	1.07368	1.06393	1.01606	1.08424	1.01965	1.07052	1.0616	1.06309	1.05718	1.01859	1.05808	1.06003	1.06467	1.06109	1.06163	1.01446	1.06026	1.02056	1.05698	1.02998	1.06329	1.06835	1.05163	1.07108	1.02201	0.9911
PTFE	1.01631	1.02826	1.02321	1.05375	1.02724	1.04234	1.04579	1.03227	1.01997	1.03054	1.01549	1.01697	1.01919	1.01345	1.01704	1.01739	1.02366	1.05065	1.02001	1.01739	1.0505	1.01645	1.04003	1.0822	1.03539	1.00452	1.01603	1.01303	1.07981	1.02372	1.01882	1.03264	1.01896	1.04583	1.02335	1.04134	1.02375	1.08853	1.02712	1.05072	1.01476	1.12825	1.07983	1.08145	1.08308	1.06508	1.05344	1.04157	1.01475
PVC-Com-2	0.87819	0.87465	0.88472	0.719	0.85859	0.87722	0.8784	0.87518	0.87042	0.88907	0.84561	0.86404	0.99884	0.98981	0.88332	0.87122	0.88586	0.90583	0.86654	0.84258	0.86548	0.89072	0.88744	0.87421	0.8723	0.96679	0.84161	0.9712	0.8681	0.87943	0.86372	0.85184	0.98536	0.87535	0.87205	0.86803	0.893	0.89603	0.97821	0.8666	1.004	0.90996	1.0063	0.90433	0.9005	0.85526	0.89779	0.97157	0.52735
PVC-Com-3	0.8804	0.87692	0.88694	0.72628	0.86097	0.87928	0.88055	0.8768	0.87291	0.89156	0.84861	0.86681	0.9997	0.99061	0.8855	0.87367	0.88761	0.90741	0.86902	0.84586	0.86737	0.89081	0.88932	0.87658	0.87463	0.96871	0.84192	0.97298	0.86928	0.88149	0.86638	0.85373	0.98641	0.877	0.87427	0.87011	0.89496	0.89597	0.97862	0.86794	1.00524	0.90878	1.00536	0.90401	0.90201	0.85564	0.89858	0.97214	0.53323
PVC-Com-4	0.96877	0.96341	0.97405	0.84472	0.96641	0.97412	0.97953	0.96658	0.97298	0.97819	0.95432	0.96861	1.01472	1.00063	0.97256	0.96388	0.97952	0.99391	0.96922	0.94702	0.96685	0.95031	0.97642	0.9822	0.97857	0.99119	0.9301	1.00119	0.96283	0.9711	0.96338	0.954	0.99902	0.97114	0.96955	0.95918	0.97575	0.95732	0.97524	0.96844	1.0228	0.95999	1.008	0.96452	0.96446	0.95201	0.98798	0.99312	0.79257
PVC-Com-5	0.99509	0.97169	0.99107	0.88463	0.98074	0.98357	0.97484	0.97937	0.99044	0.99346	0.97023	0.98658	0.94118	0.94095	0.99173	0.98391	0.99363	0.99508	0.99109	0.95581	0.98534	0.74285	0.98913	0.97183	0.99105	0.9494	0.72437	0.95064	0.95962	0.98995	0.97491	0.97246	0.94807	0.98691	0.99256	0.95847	0.99621	0.9478	0.96342	0.97651	0.93787	0.95683	0.92184	0.98076	0.90658	0.90724	0.9707	0.90059	0.93948
PVC-Com-6	0.89532	0.8951	0.90404	0.76266	0.8834	0.89769	0.90069	0.8966	0.8949	0.90958	0.87117	0.88544	1.02721	1.02862	0.90128	0.89265	0.90297	0.92593	0.889	0.87916	0.88973	0.92727	0.90608	0.89219	0.89551	1.00943	0.87801	1.00717	0.88779	0.89904	0.88585	0.87661	1.02501	0.89277	0.89094	0.8916	0.91044	0.91068	1.04432	0.89417	1.03375	0.92869	1.03045	0.9368	0.92362	0.88644	0.91961	1.00427	0.5964
PVC-Com-7	0.96977	0.94676	0.96423	0.79334	0.95187	0.95507	0.93953	0.95431	0.96231	0.96314	0.93651	0.96017	0.95495	0.95475	0.96529	0.95462	0.96628	0.96462	0.96335	0.9278	0.9559	0.93151	0.95311	0.92857	0.95941	0.94862	0.89084	0.95378	0.93041	0.96323	0.95598	0.95075	0.95309	0.95945	0.96655	0.929	0.97007	0.91771	0.96155	0.94847	0.95562	0.91902	0.92388	0.9422	0.92315	0.92133	0.95382	0.92055	0.886
PVC-Com-8	0.88787	0.8888	0.89622	0.67214	0.87249	0.89056	0.8875	0.8869	0.8846	0.90034	0.85296	0.8749	0.96072	0.95706	0.8945	0.88476	0.89489	0.92046	0.87929	0.8518	0.88349	0.92966	0.89786	0.88018	0.88396	0.93727	0.8667	0.94093	0.88335	0.89085	0.87511	0.86355	0.95392	0.88906	0.88153	0.88139	0.90534	0.91325	0.95841	0.88118	0.96045	0.91958	0.96452	0.93405	0.90388	0.88325	0.91367	0.93602	0.56772
PE-Com-1	0.89568	0.88243	0.90275	0.76039	0.71656	0.79989	0.75856	0.87744	0.77749	0.8627	0.74681	0.74026	0.0404	0.03282	0.8841	0.87311	0.89231	0.89628	0.79012	0.59524	0.78447	0.86608	0.88946	0.77885	0.74098	0.00847	0.77537	0.0165	0.85292	0.86653	0.82114	0.7398	0.02504	0.87236	0.86053	0.85595	0.88586	0.90235	0.03387	0.72462	0.04552	0.82937	0.15646	0.89105	0.71781	0.70114	0.82879	0.05566	0.93518
PE-Com-2	0.89544	0.88369	0.90302	0.75968	0.72035	0.80258	0.76265	0.87779	0.78014	0.86458	0.75023	0.74364	0.03787	0.02749	0.88475	0.87342	0.89285	0.89717	0.79267	0.59861	0.78792	0.86678	0.89046	0.78427	0.74448	0.00829	0.77838	0.01697	0.8551	0.86673	0.823	0.74279	0.02063	0.87252	0.86137	0.8571	0.88601	0.90364	0.0288	0.72785	0.04166	0.8339	0.15563	0.89189	0.72166	0.70493	0.83082	0.05633	0.92948
PE-Com-3	0.88777	0.87657	0.89549	0.75383	0.71818	0.79823	0.75884	0.87057	0.77565	0.85851	0.74705	0.74064	0.04971	0.03556	0.87779	0.8663	0.88539	0.89047	0.78813	0.59652	0.78424	0.85438	0.88322	0.78129	0.74162	0.0153	0.77444	0.02759	0.84997	0.85962	0.817	0.73983	0.02845	0.86625	0.85498	0.85053	0.87847	0.89744	0.02225	0.72494	0.05354	0.83266	0.16611	0.88477	0.71602	0.70284	0.82518	0.06617	0.92259
PE-Com-4	0.88835	0.87723	0.89663	0.75376	0.71814	0.7972	0.75718	0.86933	0.77469	0.85977	0.74599	0.73996	0.04004	0.02826	0.87924	0.86607	0.88588	0.89072	0.78716	0.59767	0.78258	0.8616	0.88284	0.77798	0.74022	0.01158	0.77771	0.02104	0.84686	0.8598	0.81606	0.7395	0.0225	0.86393	0.85469	0.84953	0.87958	0.89653	0.02631	0.72432	0.04336	0.82816	0.15622	0.8859	0.71698	0.70207	0.82466	0.05807	0.93224
PE-Com-5	0.86277	0.8489	0.86832	0.74974	0.66602	0.7565	0.71397	0.84258	0.73203	0.82426	0.69922	0.69082	0.07127	0.07392	0.8479	0.83798	0.85677	0.8626	0.74424	0.54866	0.73554	0.84393	0.85464	0.73269	0.69154	0.03142	0.7255	0.03271	0.81286	0.83197	0.77863	0.69147	0.06272	0.83578	0.82156	0.82167	0.85387	0.87509	0.09448	0.67936	0.08175	0.79242	0.19011	0.8652	0.68046	0.65617	0.79099	0.0741	0.91996
PE-Com-6	0.86613	0.85659	0.87414	0.75504	0.69752	0.77512	0.73655	0.84908	0.75216	0.83657	0.72618	0.71865	0.05738	0.04405	0.85638	0.84651	0.86382	0.86866	0.76483	0.57999	0.75961	0.8492	0.86207	0.75791	0.71987	0.02111	0.76681	0.0305	0.82801	0.83874	0.79456	0.71876	0.03889	0.84303	0.83291	0.83198	0.85842	0.88124	0.0311	0.70427	0.05853	0.81286	0.16797	0.86611	0.70114	0.68777	0.80276	0.07257	0.91083
PE-Com-7	0.89017	0.8782	0.89738	0.75471	0.71541	0.79696	0.75684	0.87248	0.77422	0.85855	0.74518	0.73836	0.05093	0.03944	0.87896	0.86793	0.88702	0.89168	0.78684	0.59455	0.78145	0.86441	0.88446	0.77799	0.73918	0.01442	0.77665	0.02484	0.84936	0.86162	0.81706	0.73777	0.03167	0.86741	0.85571	0.85202	0.8808	0.89886	0.02824	0.72302	0.0557	0.82864	0.16751	0.88595	0.7159	0.70135	0.82534	0.06645	0.93159
PE-Com-8	0.89708	0.88632	0.90442	0.77172	0.72536	0.80563	0.76566	0.87894	0.78324	0.8663	0.75334	0.74635	0.02845	0.01945	0.88709	0.87488	0.89465	0.89909	0.79463	0.60406	0.79071	0.86574	0.89264	0.78738	0.74797	0.00662	0.77788	0.01223	0.85741	0.86811	0.82444	0.74712	0.01618	0.87447	0.86349	0.85993	0.88782	0.90639	0.03307	0.733	0.0315	0.8375	0.14794	0.89509	0.72603	0.71047	0.83429	0.05182	0.94436
PET-Com-1	0.9554	0.94325	0.95204	0.87614	0.89887	0.93327	0.91647	0.94599	0.9245	0.93665	0.91451	0.92871	0.89309	0.8777	0.94889	0.94353	0.95258	0.94739	0.93335	0.89639	0.9317	0.90648	0.9472	0.92867	0.92361	0.86247	0.91296	0.87095	0.94757	0.95043	0.93663	0.90609	0.87446	0.95189	0.95027	0.93632	0.9545	0.96843	0.85156	0.90042	0.8741	0.95122	0.90359	0.93403	0.91633	0.87001	0.92989	0.8731	0.55059
PET-Com-2	0.96094	0.94945	0.958	0.88728	0.90565	0.93876	0.92126	0.95294	0.93022	0.94227	0.92096	0.93411	0.8789	0.86291	0.95488	0.95061	0.95824	0.95333	0.93934	0.90011	0.93757	0.91296	0.95356	0.93491	0.92929	0.84836	0.91871	0.85709	0.95535	0.9568	0.9419	0.91319	0.86067	0.95844	0.95641	0.943	0.96043	0.97698	0.83523	0.90602	0.8578	0.95668	0.88973	0.93981	0.92178	0.87878	0.93443	0.86153	0.56473
PET-Com-3	0.98601	0.98307	0.98493	0.88406	0.94055	0.97687	0.9614	0.98304	0.95984	0.97549	0.95079	0.96517	0.88532	0.86688	0.98395	0.97889	0.98609	0.99002	0.96795	0.92448	0.97482	0.91437	0.98758	0.97661	0.96145	0.85814	0.9015	0.86826	0.99455	0.9845	0.96919	0.9486	0.8672	0.99217	0.98303	0.9758	0.99043	1.01369	0.85244	0.94631	0.86471	1.00378	0.90603	0.98533	0.95317	0.9131	0.97536	0.87217	0.60475
PET-Com-4	0.98475	0.98094	0.98353	0.87609	0.93848	0.97433	0.95878	0.98074	0.95955	0.97375	0.94866	0.96392	0.88153	0.86458	0.98266	0.9769	0.98501	0.98929	0.96717	0.92401	0.97293	0.92254	0.98518	0.97401	0.96049	0.85702	0.91038	0.86683	0.99165	0.98285	0.96854	0.94535	0.86482	0.98951	0.98168	0.97354	0.98869	1.00922	0.85201	0.94289	0.86139	0.99713	0.89963	0.98138	0.9543	0.91093	0.9734	0.8689	0.59993
PET-Com-5	0.98493	0.9815	0.98371	0.8891	0.9363	0.97215	0.95482	0.9817	0.95779	0.97239	0.94753	0.96152	0.86525	0.84675	0.98272	0.97809	0.9843	0.98808	0.96599	0.91792	0.97032	0.91961	0.98601	0.97111	0.95831	0.83647	0.90928	0.84723	0.99186	0.98359	0.96667	0.94459	0.84735	0.99027	0.98199	0.9733	0.98944	1.00938	0.82887	0.93945	0.84302	0.993	0.88196	0.97986	0.95159	0.91011	0.96918	0.8507	0.59984
PET-Com-6	0.98279	0.97907	0.9819	0.88303	0.93611	0.97238	0.95672	0.97946	0.95673	0.97156	0.94698	0.96153	0.88334	0.86556	0.9805	0.97563	0.98301	0.98654	0.96465	0.92177	0.97051	0.91657	0.98351	0.97198	0.95787	0.85705	0.90704	0.86677	0.99016	0.98119	0.96614	0.94367	0.86596	0.98801	0.97983	0.97229	0.98682	1.00969	0.85143	0.94089	0.86265	0.99683	0.90202	0.97984	0.95175	0.9087	0.9703	0.86977	0.59528
PET-Com-7	0.98061	0.97439	0.97871	0.88955	0.92724	0.96288	0.94506	0.9747	0.9503	0.96632	0.93925	0.95404	0.86806	0.8482	0.9773	0.97202	0.97909	0.98159	0.95902	0.91036	0.96079	0.91923	0.97937	0.95999	0.95013	0.83518	0.91135	0.84619	0.9816	0.9784	0.96035	0.93543	0.84844	0.98252	0.97674	0.96533	0.98435	0.99801	0.82855	0.92918	0.84664	0.97886	0.88143	0.97058	0.94281	0.89892	0.96034	0.84886	0.58518
PET-Com-8	0.96683	0.95902	0.96428	0.87259	0.91484	0.95052	0.93405	0.95996	0.93848	0.95158	0.92801	0.94295	0.89135	0.87398	0.96221	0.95677	0.96509	0.96444	0.94701	0.90687	0.94884	0.90672	0.96262	0.9483	0.93873	0.86165	0.90926	0.87135	0.96653	0.96336	0.94861	0.9221	0.87252	0.96768	0.96275	0.95157	0.96836	0.98681	0.85232	0.91822	0.87151	0.97229	0.90599	0.95425	0.93161	0.88728	0.94754	0.87336	0.56588
PET-Com-9	0.95432	0.94328	0.95122	0.86818	0.89843	0.93361	0.91705	0.94525	0.92343	0.93658	0.91316	0.92795	0.89768	0.88202	0.94803	0.94262	0.95174	0.94766	0.93231	0.89525	0.93196	0.90113	0.94668	0.92986	0.92301	0.86642	0.90803	0.87553	0.94792	0.94934	0.93531	0.90557	0.87879	0.95164	0.94907	0.93611	0.95376	0.97018	0.85634	0.90116	0.87911	0.95455	0.91015	0.93576	0.91602	0.87053	0.93047	0.87743	0.55312
PET-Com-10	0.96221	0.95474	0.95979	0.86928	0.91171	0.94685	0.93146	0.95552	0.93494	0.94738	0.92398	0.93898	0.89553	0.87858	0.95776	0.95223	0.96093	0.96131	0.94293	0.90436	0.94501	0.90394	0.95835	0.94552	0.93507	0.86657	0.90892	0.87603	0.96306	0.95904	0.94417	0.91842	0.87714	0.96339	0.95823	0.94779	0.9639	0.98297	0.85822	0.91524	0.87621	0.9691	0.9103	0.95069	0.93019	0.88501	0.94433	0.87786	0.57055
PET-Com-11	0.98706	0.98378	0.98602	0.87922	0.94166	0.97722	0.96177	0.9836	0.96156	0.97657	0.9513	0.96611	0.88229	0.86413	0.9853	0.97969	0.98735	0.99219	0.96932	0.92487	0.97551	0.91721	0.9885	0.97712	0.96301	0.85582	0.90518	0.8662	0.995	0.98565	0.97011	0.94888	0.86474	0.99268	0.98412	0.97631	0.99163	1.01233	0.85021	0.94643	0.86183	1.00109	0.90143	0.98529	0.95589	0.91412	0.97596	0.86906	0.60353
PET-Com-12	0.95905	0.94692	0.95587	0.88628	0.90488	0.93738	0.9202	0.95053	0.92979	0.94024	0.92011	0.93347	0.88021	0.86517	0.95302	0.94813	0.95638	0.95119	0.93867	0.90003	0.93686	0.91144	0.95117	0.93408	0.929	0.85152	0.91824	0.86004	0.95405	0.95488	0.9408	0.91228	0.86265	0.95664	0.9549	0.94037	0.95845	0.97412	0.83813	0.90488	0.85931	0.9549	0.89003	0.93726	0.92116	0.87754	0.93289	0.86323	0.57138
PET-Com-13	0.95711	0.94614	0.95412	0.88061	0.90343	0.93723	0.92136	0.94883	0.92798	0.93954	0.91856	0.93264	0.9	0.88387	0.95104	0.94629	0.95495	0.95025	0.93672	0.90168	0.93594	0.90819	0.9497	0.93419	0.92779	0.87021	0.91732	0.87859	0.95193	0.95274	0.93962	0.91041	0.88144	0.95465	0.95274	0.94024	0.95649	0.97337	0.85823	0.90521	0.88085	0.95636	0.9112	0.93744	0.92131	0.87585	0.93342	0.88131	0.5547
PP-Com-1	0.00612	0.02569	0.01196	0.5497	0.03181	0.02668	0.03893	0.01663	0.0112	0.02196	0.01382	0.01382	0.83331	0.83048	0.01188	0.00977	0.00853	0.04313	0.00613	0.05558	0.03117	0.12099	0.02411	0.10411	0.02329	0.8134	0.17678	0.82374	0.0855	0.00928	0.00242	0.02566	0.82962	0.02435	0.00478	0.02828	0.01762	0.14953	0.818	0.04438	0.82808	0.28387	0.83145	0.12141	0.09168	0.10498	0.044	0.8049	0.87759
PP-Com-2	0.00898	0.02716	0.01182	0.54688	0.03456	0.03054	0.04208	0.01956	0.01636	0.0186	0.01683	0.01734	0.82913	0.8267	0.01408	0.01105	0.01045	0.04438	0.00916	0.05456	0.0335	0.11962	0.02508	0.10555	0.02546	0.81011	0.17478	0.82012	0.08966	0.01196	0.0028	0.02874	0.82649	0.02918	0.00869	0.03135	0.01946	0.15223	0.81663	0.04523	0.82414	0.28313	0.82667	0.11818	0.09233	0.10389	0.04931	0.80097	0.87536
PP-Com-3	0.01666	0.03	0.0186	0.55145	0.04454	0.03913	0.05585	0.02818	0.02854	0.02654	0.03503	0.02495	0.87216	0.8694	0.01331	0.01783	0.01944	0.0348	0.02097	0.07628	0.05206	0.09548	0.01978	0.12301	0.04068	0.85586	0.182	0.86614	0.10272	0.00692	0.02006	0.03567	0.86859	0.03957	0.01787	0.04044	0.00623	0.15557	0.85602	0.05959	0.86758	0.29464	0.8672	0.1013	0.09399	0.11034	0.05189	0.84671	0.89253
PP-Com-4	0.02119	0.03117	0.02703	0.53576	0.02022	0.02451	0.03421	0.02701	0.00981	0.03269	0.01145	0.00512	0.75821	0.75815	0.01939	0.01932	0.024	0.04549	0.00736	0.0362	0.03312	0.10586	0.02923	0.10285	0.01927	0.73707	0.16266	0.74809	0.08951	0.01317	0.0129	0.01541	0.75343	0.03291	0.0152	0.0334	0.01797	0.15156	0.74868	0.03685	0.75604	0.27946	0.76749	0.11699	0.0745	0.08551	0.04139	0.73053	0.88211
PP-Com-5	0.03241	0.03317	0.03061	0.52242	0.01208	0.02163	0.02283	0.03073	0.00928	0.02744	0.00596	0.00454	0.72847	0.73138	0.02475	0.02331	0.02754	0.04579	0.00798	0.02206	0.02532	0.11185	0.032	0.08448	0.01151	0.70243	0.15233	0.71288	0.08387	0.02281	0.01263	0.01328	0.72463	0.03994	0.02258	0.03148	0.02804	0.14538	0.72146	0.026	0.72785	0.25827	0.73379	0.10925	0.06249	0.06924	0.03938	0.69252	0.86779
PP-Com-6	0.0141	0.01881	0.01432	0.54536	0.02326	0.01751	0.02769	0.01371	0.00688	0.02336	0.01404	0.0116	0.82886	0.8286	0.00884	0.01154	0.01122	0.02804	0.00806	0.05738	0.02816	0.11052	0.0175	0.09068	0.02048	0.81193	0.16912	0.82194	0.07291	0.00853	0.01119	0.02077	0.82509	0.0207	0.00848	0.02085	0.01323	0.13038	0.81228	0.03716	0.82469	0.26126	0.81961	0.10006	0.0742	0.09076	0.02728	0.79768	0.88341
PP-Com-7	0.0106	0.02606	0.01491	0.54693	0.02426	0.0225	0.03183	0.01789	0.00635	0.02405	0.00948	0.01024	0.81268	0.81176	0.01337	0.01225	0.01026	0.04348	0.0049	0.04859	0.02754	0.11945	0.02616	0.09599	0.01797	0.79123	0.16657	0.8019	0.08148	0.01277	0.00344	0.02159	0.80912	0.02488	0.00578	0.02651	0.02249	0.14691	0.80012	0.03833	0.8082	0.27595	0.81178	0.12261	0.08383	0.09727	0.03812	0.78188	0.8815
Inconnu	0.85675	0.82779	0.84582	0.73597	0.74621	0.78547	0.74296	0.83097	0.78262	0.82049	0.7658	0.77167	0.70512	0.72237	0.84039	0.8344	0.83196	0.81137	0.791	0.71637	0.77444	0.86144	0.82676	0.71416	0.75478	0.67422	0.77532	0.67256	0.77056	0.83459	0.81155	0.76058	0.70213	0.82758	0.82641	0.8025	0.84889	0.83024	0.71732	0.74645	0.71457	0.78276	0.70599	0.83053	0.74701	0.73015	0.79325	0.65542	0.85721
PP-Com-8	0.0464	0.04686	0.03999	0.5624	0.05814	0.05503	0.07008	0.05034	0.04606	0.04495	0.05812	0.0468	0.88554	0.88391	0.02825	0.04634	0.04392	0.03962	0.04861	0.1005	0.07633	0.11014	0.03563	0.13873	0.06104	0.87056	0.20066	0.88111	0.12342	0.03124	0.0522	0.0567	0.88182	0.06559	0.04657	0.06127	0.02497	0.17038	0.86936	0.07731	0.88054	0.29895	0.88264	0.10305	0.10169	0.128	0.05638	0.86456	0.91211
PP-Com-9	0.02837	0.03643	0.0297	0.55749	0.0479	0.044	0.05985	0.03773	0.0343	0.03771	0.04249	0.03072	0.8665	0.86533	0.02051	0.02835	0.03076	0.03902	0.03045	0.08347	0.06138	0.09504	0.02779	0.12906	0.0484	0.85068	0.18546	0.86144	0.11026	0.01543	0.0337	0.04137	0.86273	0.04902	0.02884	0.04647	0.01292	0.15692	0.8512	0.06525	0.86252	0.2968	0.86274	0.1044	0.09526	0.11305	0.05197	0.84182	0.90399
PP-Com-10	0.04037	0.04156	0.03021	0.55267	0.05673	0.05415	0.0677	0.04509	0.04825	0.03124	0.05606	0.04442	0.88548	0.8846	0.02354	0.03646	0.03595	0.0351	0.04446	0.09314	0.07295	0.10498	0.02725	0.13388	0.05702	0.87032	0.19715	0.88201	0.1229	0.02389	0.04355	0.05498	0.88214	0.06547	0.04258	0.05427	0.0171	0.15983	0.87019	0.0719	0.88124	0.29396	0.87704	0.08968	0.09613	0.11868	0.06006	0.86126	0.9067
PP-Com-11	0.02019	0.03134	0.0224	0.55042	0.0433	0.03899	0.0545	0.03139	0.02834	0.02957	0.03458	0.0232	0.8547	0.85255	0.0158	0.02148	0.0236	0.03637	0.02163	0.07226	0.05236	0.09583	0.02238	0.12196	0.04013	0.83813	0.17988	0.84836	0.10378	0.00944	0.0228	0.03513	0.85142	0.04268	0.02151	0.04211	0.00754	0.15592	0.8404	0.05904	0.85064	0.29318	0.85229	0.10226	0.09073	0.10877	0.05053	0.82944	0.89501
PP-Com-12	0.00464	0.02027	0.00644	0.55525	0.04201	0.03234	0.04794	0.01569	0.02063	0.01589	0.02591	0.02351	0.87959	0.8763	0.00692	0.00725	0.00739	0.03306	0.01359	0.07308	0.04092	0.11015	0.01569	0.11334	0.0339	0.86471	0.18447	0.87503	0.0909	0.00475	0.00724	0.0339	0.8763	0.02685	0.00738	0.02893	0.00819	0.14662	0.8627	0.0536	0.8732	0.2885	0.8712	0.10496	0.09582	0.11215	0.04744	0.8541	0.88602
PS-Com-1	0.95982	0.93899	0.95586	0.58173	0.95191	0.94334	0.94299	0.94874	0.96231	0.95026	0.95276	0.96005	1.06619	1.07738	0.95895	0.95197	0.95617	0.94371	0.95955	0.90812	0.94499	0.98611	0.94171	0.92971	0.95276	1.06984	0.833	1.06607	0.91952	0.9559	0.9609	0.9501	1.068	0.93755	0.95924	0.93074	0.95199	0.89811	1.07745	0.94205	1.08235	0.90104	1.03208	0.92729	0.93747	0.92516	0.94103	1.02772	0.93484
PS-Com-2	0.93074	0.90002	0.92359	0.63523	0.91702	0.90576	0.90621	0.91355	0.9309	0.91534	0.91528	0.92709	1.07206	1.08833	0.92592	0.91488	0.92473	0.9093	0.92713	0.88666	0.91037	0.94436	0.90828	0.8898	0.91958	1.07637	0.82487	1.07482	0.88061	0.92355	0.92764	0.91364	1.07729	0.90544	0.92872	0.89242	0.91957	0.85241	1.09126	0.90492	1.09334	0.85879	1.03575	0.8838	0.89381	0.88336	0.90596	1.0271	0.94146
PS-Com-3	0.92897	0.89825	0.92215	0.65844	0.91725	0.90469	0.90515	0.91161	0.9293	0.91408	0.91442	0.92612	1.07663	1.0913	0.92466	0.91302	0.92269	0.90752	0.92565	0.88936	0.90887	0.95366	0.90606	0.8891	0.91836	1.07892	0.84152	1.0773	0.8793	0.9225	0.92619	0.91403	1.08036	0.90375	0.92765	0.89154	0.91814	0.85039	1.09308	0.90546	1.09857	0.8581	1.03993	0.88242	0.89579	0.88682	0.9061	1.03133	0.95152
PS-Com-4	0.91932	0.89037	0.91326	0.60875	0.89633	0.89118	0.89006	0.90252	0.91217	0.90279	0.89812	0.90595	1.05476	1.07525	0.91386	0.90362	0.91274	0.89872	0.90847	0.86619	0.89158	0.94584	0.89467	0.87189	0.89693	1.05419	0.80992	1.05084	0.86672	0.91087	0.91135	0.89316	1.05987	0.89354	0.91197	0.88339	0.90885	0.85137	1.08024	0.88745	1.07797	0.85056	1.02491	0.87946	0.87616	0.8681	0.89524	1.00696	0.93373
PS-Com-5	0.92652	0.90012	0.92088	0.60234	0.91202	0.90301	0.90339	0.91132	0.92463	0.9125	0.91402	0.92106	1.06376	1.08185	0.92317	0.91382	0.92143	0.90634	0.92071	0.87963	0.90473	0.95649	0.90403	0.88732	0.91202	1.06882	0.81956	1.06464	0.87817	0.91955	0.92427	0.90916	1.0694	0.9008	0.92249	0.89403	0.91561	0.85918	1.08464	0.90161	1.08531	0.86011	1.02829	0.88585	0.89409	0.88246	0.90396	1.01971	0.93482
PS-Com-6	0.93467	0.90819	0.92958	0.66581	0.92719	0.91516	0.91799	0.92124	0.93848	0.92293	0.92499	0.93475	1.09185	1.10842	0.93141	0.9221	0.92977	0.91584	0.93391	0.90238	0.91929	0.95965	0.91442	0.90299	0.92739	1.09689	0.84642	1.09432	0.89129	0.92895	0.93467	0.92326	1.09704	0.91246	0.93401	0.9028	0.9242	0.8653	1.11254	0.91607	1.11482	0.87293	1.05939	0.89371	0.90716	0.89865	0.91542	1.04932	0.96737
PS-Com-7	0.92956	0.90173	0.92384	0.5986	0.9087	0.90336	0.90228	0.9138	0.92395	0.9141	0.9108	0.91872	1.05765	1.076	0.92486	0.915	0.92367	0.91057	0.92079	0.87425	0.90413	0.95716	0.90603	0.88669	0.90995	1.05698	0.81528	1.05397	0.88022	0.92241	0.92323	0.90591	1.06132	0.90482	0.92395	0.8941	0.91973	0.86076	1.07999	0.89955	1.0796	0.86188	1.02754	0.89038	0.88996	0.87994	0.90641	1.01147	0.93438
PS-Com-8	0.93739	0.91077	0.93182	0.66299	0.9313	0.91872	0.92204	0.92401	0.94236	0.92526	0.92924	0.93866	1.10126	1.11769	0.93381	0.92503	0.93243	0.9178	0.9376	0.90657	0.92308	0.96227	0.91619	0.90573	0.931	1.10635	0.84917	1.10388	0.89387	0.93171	0.938	0.92729	1.10632	0.91544	0.93671	0.90628	0.92649	0.86863	1.12109	0.92018	1.12452	0.87436	1.06744	0.89496	0.91036	0.90264	0.91826	1.0579	0.96406
PS-Com-9	0.93618	0.90919	0.93049	0.65729	0.92928	0.91703	0.91998	0.92257	0.94071	0.92357	0.92738	0.93687	1.09988	1.11669	0.93242	0.92344	0.93112	0.91652	0.93594	0.90394	0.92129	0.96095	0.91476	0.90386	0.92923	1.10482	0.84589	1.10231	0.89219	0.93024	0.93644	0.92525	1.10503	0.91401	0.93516	0.9046	0.92508	0.86715	1.11994	0.91818	1.12322	0.87285	1.0663	0.89347	0.90832	0.90029	0.91703	1.05631	0.96038
PS-Com-10	0.92811	0.89649	0.92169	0.61631	0.91512	0.90381	0.90406	0.91017	0.9283	0.91411	0.91185	0.92317	1.0602	1.07233	0.92414	0.91258	0.92308	0.9091	0.9241	0.87639	0.90781	0.91364	0.9059	0.88892	0.91745	1.06247	0.79015	1.06114	0.8777	0.92093	0.92295	0.91017	1.0639	0.90257	0.9264	0.88924	0.91758	0.84856	1.07619	0.90364	1.08053	0.85753	1.02442	0.8833	0.88556	0.87584	0.90313	1.01087	0.92857
PS-Com-11	0.93764	0.90906	0.9314	0.64494	0.93041	0.91742	0.9194	0.92208	0.94166	0.92461	0.92764	0.93838	1.09744	1.1121	0.93376	0.92355	0.93223	0.91782	0.93739	0.90159	0.92188	0.96341	0.9156	0.90363	0.93123	1.10084	0.84452	1.09894	0.89166	0.93211	0.93749	0.92671	1.10106	0.91417	0.93743	0.90265	0.92706	0.86195	1.11415	0.91942	1.11964	0.87114	1.06109	0.8935	0.91031	0.90084	0.91766	1.05276	0.95164
LY-01	0.86658	0.85565	0.87531	0.74405	0.6822	0.76909	0.72831	0.84961	0.74436	0.83388	0.71305	0.7058	0.05278	0.04647	0.85481	0.84611	0.86388	0.86971	0.7562	0.56147	0.75006	0.84732	0.86213	0.74806	0.70614	0.01557	0.74348	0.02093	0.82349	0.83816	0.78912	0.70556	0.03778	0.84286	0.82908	0.83016	0.8589	0.88275	0.0547	0.69232	0.0589	0.80473	0.1717	0.86972	0.6915	0.67151	0.7986	0.06189	0.91173
LY-02	0.90778	0.89307	0.91394	0.77382	0.72382	0.81027	0.76783	0.88746	0.7885	0.87257	0.75601	0.75004	0.02722	0.0274	0.89525	0.88397	0.90365	0.90559	0.80046	0.60628	0.7938	0.8671	0.90005	0.78582	0.7485	0.01268	0.76459	0.01378	0.85916	0.8778	0.83245	0.74695	0.02046	0.88287	0.87076	0.86551	0.89824	0.90808	0.06145	0.73155	0.02873	0.83238	0.14312	0.90099	0.72693	0.70225	0.8375	0.04869	0.9536
LY-03	0.93268	0.90661	0.92731	0.61522	0.92427	0.9129	0.91456	0.91888	0.93647	0.92058	0.92353	0.93347	1.09027	1.10516	0.92989	0.92108	0.92782	0.9129	0.93224	0.89324	0.91653	0.96155	0.91165	0.89772	0.92505	1.09421	0.83338	1.09153	0.88675	0.92746	0.93301	0.92063	1.09375	0.90908	0.93183	0.90011	0.92273	0.8625	1.1056	0.91252	1.1113	0.86672	1.05268	0.89154	0.90574	0.89383	0.91138	1.04501	0.93564
LY-04	0.03135	0.02686	0.03076	0.51981	0.03464	0.0271	0.03606	0.02187	0.02998	0.0339	0.02769	0.03152	0.81792	0.82093	0.02974	0.02099	0.02915	0.04318	0.02467	0.07091	0.0331	0.12454	0.02756	0.08572	0.03469	0.80542	0.18371	0.81261	0.06667	0.02342	0.02551	0.0231	0.81366	0.02699	0.02412	0.02505	0.02951	0.10838	0.80204	0.03283	0.81537	0.2278	0.78144	0.08658	0.07501	0.06594	0.03992	0.77388	0.81347
LY-05	0.83262	0.82137	0.83995	0.74058	0.6479	0.73335	0.69245	0.81402	0.70936	0.79871	0.67723	0.66986	0.04231	0.04245	0.82088	0.8101	0.82859	0.83545	0.72042	0.52926	0.71485	0.81526	0.82757	0.7137	0.67058	0.01635	0.7078	0.01659	0.78933	0.80317	0.75272	0.67107	0.03638	0.80755	0.79459	0.79477	0.82506	0.85082	0.07641	0.65915	0.04977	0.77706	0.16045	0.84097	0.65979	0.63839	0.76614	0.05205	0.91923
LY-06	0.95323	0.93946	0.94899	0.88016	0.8965	0.92915	0.91199	0.94232	0.9226	0.93345	0.91244	0.92721	0.89317	0.87803	0.94615	0.94039	0.94969	0.94264	0.93181	0.89564	0.92842	0.90638	0.94359	0.92356	0.9219	0.86343	0.9155	0.87205	0.94235	0.94797	0.93497	0.90392	0.87469	0.94821	0.94867	0.93164	0.95163	0.95973	0.85048	0.89665	0.87442	0.94316	0.89935	0.92745	0.91234	0.86615	0.92491	0.87219	0.55316
LY-07	0.86944	0.85466	0.87663	0.76231	0.70405	0.77648	0.73656	0.84794	0.75973	0.84063	0.73387	0.72834	0.03094	0.01991	0.86041	0.84834	0.86635	0.8649	0.77254	0.59072	0.76375	0.84665	0.86109	0.75217	0.72496	0.01296	0.77251	0.01989	0.81854	0.84103	0.80205	0.72372	0.01554	0.83952	0.83693	0.82702	0.8597	0.86392	0.01763	0.7047	0.03276	0.79518	0.12933	0.85775	0.69531	0.68019	0.79814	0.04672	0.92793
LY-08	0.74986	0.65008	0.71248	0.74953	0.66367	0.6086	0.59782	0.65176	0.70186	0.67893	0.69919	0.71759	0.87822	0.89954	0.72241	0.70343	0.71265	0.62212	0.7083	0.72043	0.59601	0.78879	0.65022	0.46898	0.6577	0.9202	0.74281	0.88836	0.47763	0.71936	0.72457	0.6451	0.8843	0.6106	0.71273	0.61132	0.71664	0.41935	0.8637	0.58144	0.90186	0.30007	0.61712	0.4963	0.55322	0.48737	0.58612	0.75427	0.66206
LY-09	0.9667	0.94225	0.95644	0.94409	0.92599	0.92693	0.89722	0.94296	0.93069	0.94954	0.92913	0.94209	0.90714	0.89977	0.95576	0.9556	0.94521	0.91881	0.94469	0.92979	0.92843	0.96684	0.94304	0.87215	0.92518	0.88678	0.96723	0.88821	0.89519	0.95858	0.95083	0.93079	0.89062	0.94411	0.95594	0.91952	0.96535	0.90158	0.87127	0.91554	0.90265	0.89211	0.87271	0.93071	0.91053	0.90812	0.91549	0.87405	0.96805
MAG-01	0.2659	0.23906	0.24059	0.65834	0.25826	0.23679	0.22253	0.23776	0.25074	0.24373	0.26135	0.27205	0.90847	0.91194	0.24754	0.25193	0.2396	0.21042	0.25915	0.30608	0.24461	0.34121	0.23445	0.22643	0.24966	0.90441	0.3855	0.91006	0.22248	0.25362	0.26071	0.26395	0.90438	0.24307	0.2566	0.22285	0.25479	0.25426	0.86852	0.24471	0.90322	0.32528	0.81421	0.25182	0.25932	0.2697	0.21945	0.84812	0.89141
MAG-02	0.98076	0.96565	0.97087	0.91405	0.92801	0.95373	0.92922	0.96714	0.95245	0.95892	0.94406	0.95985	0.87348	0.86296	0.97319	0.96873	0.96965	0.9562	0.96244	0.92461	0.95457	0.94175	0.96745	0.92685	0.9469	0.85879	0.92599	0.86469	0.95139	0.97539	0.9643	0.93763	0.86148	0.97073	0.97496	0.94782	0.97951	0.96316	0.84512	0.92173	0.85325	0.93468	0.85304	0.94775	0.93114	0.89032	0.9422	0.84754	0.6742
MAG-04	0.916	0.84812	0.90666	0.79738	0.73383	0.75882	0.72267	0.852	0.8023	0.85604	0.7752	0.7727	0.11898	0.14124	0.89823	0.87944	0.89727	0.84623	0.81056	0.65633	0.73871	0.88257	0.85711	0.64927	0.73982	0.16275	0.78292	0.13399	0.71118	0.87621	0.84919	0.74046	0.1323	0.81415	0.86928	0.80929	0.88669	0.70521	0.19262	0.68785	0.14152	0.5588	0.05737	0.76241	0.64347	0.6059	0.76379	0.07686	0.91851
MAG-05	0.95322	0.92568	0.94679	0.52466	0.94045	0.92664	0.92563	0.93583	0.95301	0.93844	0.94364	0.95116	1.05742	1.06962	0.95115	0.94303	0.94761	0.9283	0.9501	0.89243	0.9266	0.98325	0.92826	0.90144	0.94022	1.06387	0.81195	1.05797	0.89242	0.9474	0.95345	0.93772	1.0595	0.92041	0.95002	0.91387	0.94289	0.86866	1.06515	0.92428	1.07433	0.85964	1.00404	0.90173	0.91732	0.90066	0.92223	1.0114	0.89496
MU-01	0.85538	0.84359	0.86405	0.76594	0.67371	0.75633	0.71574	0.83596	0.73433	0.82396	0.70395	0.69601	0.03146	0.03288	0.84524	0.83313	0.85309	0.85826	0.74568	0.55771	0.74026	0.8342	0.85029	0.73578	0.69713	0.01475	0.73351	0.01287	0.80974	0.82578	0.7783	0.69562	0.0291	0.82782	0.8186	0.81677	0.84759	0.86492	0.07678	0.68331	0.0358	0.79201	0.14456	0.86232	0.68149	0.65841	0.78806	0.04553	0.9345
MU-02	0.02387	0.01981	0.02286	0.52975	0.01502	0.01009	0.01695	0.01719	0.00771	0.02246	0.01043	0.00667	0.77473	0.77748	0.0177	0.01654	0.02005	0.02664	0.0052	0.04151	0.0145	0.1101	0.01671	0.06553	0.01027	0.75803	0.15975	0.76418	0.05659	0.01247	0.01239	0.01027	0.77142	0.01891	0.01324	0.01917	0.0158	0.11164	0.76133	0.0204	0.77395	0.2205	0.75109	0.08042	0.05318	0.05865	0.02099	0.73283	0.86136
MU-03	0.1047	0.09092	0.09444	0.58227	0.09528	0.0876	0.08217	0.08865	0.08268	0.10476	0.09173	0.09201	0.82372	0.82547	0.08947	0.0906	0.09217	0.08387	0.0914	0.13177	0.10539	0.16856	0.09086	0.13644	0.09691	0.80719	0.23228	0.81997	0.12219	0.08813	0.09904	0.09827	0.81869	0.09895	0.09642	0.08109	0.09145	0.16836	0.79861	0.10783	0.81889	0.29704	0.79725	0.15676	0.13048	0.14999	0.08693	0.78367	0.90708
MU-04	0.94002	0.91437	0.93513	0.55199	0.92896	0.92007	0.91978	0.92714	0.94152	0.92812	0.92972	0.93696	1.07061	1.08648	0.93762	0.92974	0.9356	0.92226	0.9377	0.8866	0.92233	0.97377	0.91951	0.9057	0.93014	1.07401	0.81681	1.0705	0.89618	0.93454	0.94007	0.92627	1.07416	0.91664	0.93757	0.90869	0.93031	0.87714	1.08475	0.9188	1.09026	0.87813	1.03629	0.9038	0.91321	0.90232	0.92028	1.02843	0.91686
MU-05	0.0752	0.0653	0.05813	0.55049	0.06419	0.06401	0.06369	0.06549	0.05792	0.05754	0.06826	0.06422	0.83634	0.83722	0.05225	0.06739	0.06043	0.04424	0.06367	0.10047	0.0792	0.14689	0.05322	0.11165	0.06313	0.81997	0.20785	0.82895	0.10794	0.0567	0.06807	0.0708	0.83221	0.07987	0.06921	0.06709	0.05409	0.16453	0.81533	0.07628	0.83226	0.26885	0.81375	0.11037	0.09877	0.12161	0.06168	0.79841	0.89611
MU-06	0.95192	0.90993	0.94177	0.6584	0.93872	0.91231	0.91133	0.92257	0.95255	0.93126	0.9385	0.95478	1.08961	1.10191	0.94783	0.93342	0.94093	0.91077	0.94919	0.92057	0.91251	0.98088	0.91513	0.86959	0.93481	1.10009	0.86393	1.09371	0.86002	0.94401	0.95119	0.93181	1.09062	0.90569	0.94914	0.89476	0.93816	0.81437	1.09308	0.909	1.11194	0.80101	1.00646	0.86155	0.89428	0.87448	0.90384	1.02899	0.91644
MU-07	0.96015	0.9169	0.95171	0.7045	0.95181	0.92208	0.92354	0.93438	0.9625	0.93997	0.95045	0.96369	1.0865	1.10013	0.9569	0.94515	0.95173	0.92113	0.95851	0.93294	0.92296	0.98725	0.92588	0.88322	0.94503	1.09977	0.8784	1.09176	0.87323	0.95349	0.96103	0.94348	1.08907	0.91745	0.95911	0.90931	0.94523	0.82814	1.09272	0.92099	1.11044	0.81154	1.00623	0.86911	0.90458	0.88954	0.91467	1.03103	0.95376
MU-08	0.84802	0.83306	0.85522	0.74474	0.65023	0.73982	0.69639	0.82616	0.71787	0.81179	0.68354	0.67639	0.05664	0.06523	0.83491	0.82295	0.84244	0.84733	0.72909	0.53538	0.71996	0.8247	0.83932	0.71234	0.67519	0.0303	0.70549	0.02738	0.79208	0.81676	0.76407	0.6742	0.05459	0.81756	0.80584	0.80275	0.83952	0.85261	0.11192	0.66161	0.06672	0.77099	0.16795	0.85108	0.66349	0.6326	0.77393	0.05653	0.91362
MU-09	0.93578	0.9092	0.92712	0.46093	0.92584	0.91666	0.91306	0.91792	0.94031	0.9214	0.92802	0.93949	1.14793	1.16355	0.93085	0.92127	0.92737	0.90873	0.93667	0.88997	0.9187	0.97202	0.90887	0.89361	0.92816	1.1437	0.8082	1.14571	0.88283	0.9296	0.93805	0.92294	1.14617	0.90983	0.93213	0.89511	0.92476	0.86649	1.14681	0.91374	1.17047	0.86308	1.10168	0.88742	0.91388	0.89247	0.91247	1.0925	0.83012
[truncated: 99 more columns]

## Sheet: PearsonClusteringFunctions
Nearest Neighbor		Furthest Neighbor		Group Average		Ward
Variables	Cluster	Variables	Cluster	Variables	Cluster	Variables	Cluster
LB-1	1	LB-1	1	LB-1	1	LB-1	1
LB-2	1	LB-2	1	LB-2	1	LB-2	1
LB-4	1	LB-4	1	LB-4	1	LB-4	1
LB-5	1	LB-5	4	LB-5	2	LB-5	2
LB-6	1	LB-6	1	LB-6	1	LB-6	1
LB-7	1	LB-7	1	LB-7	1	LB-7	1
LB-8	1	LB-8	1	LB-8	1	LB-8	1
LB-9	1	LB-9	1	LB-9	1	LB-9	1
LB-10	1	LB-10	1	LB-10	1	LB-10	1
LB-11	1	LB-11	1	LB-11	1	LB-11	1
LB-12	1	LB-12	1	LB-12	1	LB-12	1
LB-13	1	LB-13	1	LB-13	1	LB-13	1
LB-14	4	LB-14	2	LB-14	4	LB-14	9
LB-15	4	LB-15	2	LB-15	4	LB-15	9
LB-17	1	LB-17	1	LB-17	1	LB-17	1
LB-20	1	LB-20	1	LB-20	1	LB-20	1
LB-21	1	LB-21	1	LB-21	1	LB-21	1
LB-22	1	LB-22	1	LB-22	1	LB-22	1
LB-23	1	LB-23	1	LB-23	1	LB-23	1
LB-24	1	LB-24	1	LB-24	1	LB-24	1
LB-25	1	LB-25	1	LB-25	1	LB-25	1
LB-26	1	LB-26	1	LB-26	1	LB-26	1
LB-27	1	LB-27	1	LB-27	1	LB-27	1
LB-28	1	LB-28	1	LB-28	1	LB-28	1
LB-29	1	LB-29	1	LB-29	1	LB-29	1
LB-30	4	LB-30	2	LB-30	4	LB-30	9
LB-31	1	LB-31	1	LB-31	1	LB-31	1
LB-32	4	LB-32	2	LB-32	4	LB-32	9
LB-35	1	LB-35	1	LB-35	1	LB-35	1
LB-36	1	LB-36	1	LB-36	1	LB-36	1
LB-37	1	LB-37	1	LB-37	1	LB-37	1
LB-38	1	LB-38	1	LB-38	1	LB-38	1
LB-39	4	LB-39	2	LB-39	4	LB-39	9
LB-40	1	LB-40	1	LB-40	1	LB-40	1
LB-41	1	LB-41	1	LB-41	1	LB-41	1
LB-42	1	LB-42	1	LB-42	1	LB-42	1
LB-43	1	LB-43	1	LB-43	1	LB-43	1
LB-44	1	LB-44	1	LB-44	1	LB-44	1
LB-45	4	LB-45	2	LB-45	4	LB-45	9
LB-46	1	LB-46	1	LB-46	1	LB-46	1
LB-48	4	LB-48	2	LB-48	4	LB-48	9
LB-49	1	LB-49	1	LB-49	1	LB-49	1
LB-50	4	LB-50	2	LB-50	4	LB-50	9
LB-51	1	LB-51	1	LB-51	1	LB-51	1
LB-52	1	LB-52	1	LB-52	1	LB-52	1
LB-53	1	LB-53	1	LB-53	1	LB-53	1
LB-54	1	LB-54	1	LB-54	1	LB-54	1
LB-55	4	LB-55	2	LB-55	4	LB-55	9
LB-56	2	LB-56	4	LB-56	2	LB-56	2
LB-57	1	LB-57	1	LB-57	1	LB-57	1
LB-58	1	LB-58	1	LB-58	1	LB-58	1
LB-59	4	LB-59	2	LB-59	4	LB-59	9
LB-60	1	LB-60	1	LB-60	1	LB-60	1
LB-61	1	LB-61	1	LB-61	1	LB-61	1
LB-62	1	LB-62	1	LB-62	1	LB-62	1
LB-63	1	LB-63	1	LB-63	1	LB-63	1
LB-64	1	LB-64	1	LB-64	1	LB-64	1
LB-65	1	LB-65	1	LB-65	1	LB-65	1
LB-66	1	LB-66	1	LB-66	1	LB-66	1
LB-67	1	LB-67	1	LB-67	1	LB-67	1
LB-68	1	LB-68	1	LB-68	1	LB-68	1
PP-1	1	PP-1	1	PP-1	1	PP-1	1
PS-1'	1	PS-1'	7	PS-1'	8	PS-1'	10
PS-1	1	PS-1	7	PS-1	8	PS-1	10
PVC-1	3	PVC-1	8	PVC-1	6	PVC-1	6
PE-1	4	PE-1	2	PE-1	4	PE-1	9
PET-1	5	PET-1	6	PET-1	7	PET-1	8
PE-1'	4	PE-1'	2	PE-1'	4	PE-1'	9
PVC-1'	3	PVC-1'	8	PVC-1'	6	PVC-1'	6
PU	6	PU	5	PU	3	PU	2
ABS	1	ABS	7	ABS	8	ABS	10
PA66	7	PA66	3	PA66	5	PA66	5
PC	9	PC	9	PC	9	PC	3
PTFE	10	PTFE	10	PTFE	10	PTFE	4
PVC-Com-2	3	PVC-Com-2	8	PVC-Com-2	6	PVC-Com-2	7
PVC-Com-3	3	PVC-Com-3	8	PVC-Com-3	6	PVC-Com-3	7
PVC-Com-4	3	PVC-Com-4	8	PVC-Com-4	6	PVC-Com-4	6
PVC-Com-5	3	PVC-Com-5	8	PVC-Com-5	6	PVC-Com-5	6
PVC-Com-6	3	PVC-Com-6	8	PVC-Com-6	6	PVC-Com-6	7
PVC-Com-7	3	PVC-Com-7	8	PVC-Com-7	6	PVC-Com-7	6
PVC-Com-8	3	PVC-Com-8	8	PVC-Com-8	6	PVC-Com-8	7
PE-Com-1	4	PE-Com-1	2	PE-Com-1	4	PE-Com-1	9
PE-Com-2	4	PE-Com-2	2	PE-Com-2	4	PE-Com-2	9
PE-Com-3	4	PE-Com-3	2	PE-Com-3	4	PE-Com-3	9
PE-Com-4	4	PE-Com-4	2	PE-Com-4	4	PE-Com-4	9
PE-Com-5	4	PE-Com-5	2	PE-Com-5	4	PE-Com-5	9
PE-Com-6	4	PE-Com-6	2	PE-Com-6	4	PE-Com-6	9
PE-Com-7	4	PE-Com-7	2	PE-Com-7	4	PE-Com-7	9
PE-Com-8	4	PE-Com-8	2	PE-Com-8	4	PE-Com-8	9
PET-Com-1	5	PET-Com-1	6	PET-Com-1	7	PET-Com-1	8
PET-Com-2	5	PET-Com-2	6	PET-Com-2	7	PET-Com-2	8
PET-Com-3	5	PET-Com-3	6	PET-Com-3	7	PET-Com-3	8
PET-Com-4	5	PET-Com-4	6	PET-Com-4	7	PET-Com-4	8
PET-Com-5	5	PET-Com-5	6	PET-Com-5	7	PET-Com-5	8
PET-Com-6	5	PET-Com-6	6	PET-Com-6	7	PET-Com-6	8
PET-Com-7	5	PET-Com-7	6	PET-Com-7	7	PET-Com-7	8
PET-Com-8	5	PET-Com-8	6	PET-Com-8	7	PET-Com-8	8
PET-Com-9	5	PET-Com-9	6	PET-Com-9	7	PET-Com-9	8
PET-Com-10	5	PET-Com-10	6	PET-Com-10	7	PET-Com-10	8
PET-Com-11	5	PET-Com-11	6	PET-Com-11	7	PET-Com-11	8
PET-Com-12	5	PET-Com-12	6	PET-Com-12	7	PET-Com-12	8
PET-Com-13	5	PET-Com-13	6	PET-Com-13	7	PET-Com-13	8
PP-Com-1	1	PP-Com-1	1	PP-Com-1	1	PP-Com-1	1
PP-Com-2	1	PP-Com-2	1	PP-Com-2	1	PP-Com-2	1
PP-Com-3	1	PP-Com-3	1	PP-Com-3	1	PP-Com-3	1
PP-Com-4	1	PP-Com-4	1	PP-Com-4	1	PP-Com-4	1
PP-Com-5	1	PP-Com-5	1	PP-Com-5	1	PP-Com-5	1
PP-Com-6	1	PP-Com-6	1	PP-Com-6	1	PP-Com-6	1
PP-Com-7	1	PP-Com-7	1	PP-Com-7	1	PP-Com-7	1
Inconnu	8	Inconnu	3	Inconnu	5	Inconnu	5
PP-Com-8	1	PP-Com-8	1	PP-Com-8	1	PP-Com-8	1
PP-Com-9	1	PP-Com-9	1	PP-Com-9	1	PP-Com-9	1
PP-Com-10	1	PP-Com-10	1	PP-Com-10	1	PP-Com-10	1
PP-Com-11	1	PP-Com-11	1	PP-Com-11	1	PP-Com-11	1
PP-Com-12	1	PP-Com-12	1	PP-Com-12	1	PP-Com-12	1
PS-Com-1	1	PS-Com-1	7	PS-Com-1	8	PS-Com-1	10
PS-Com-2	1	PS-Com-2	7	PS-Com-2	8	PS-Com-2	10
PS-Com-3	1	PS-Com-3	7	PS-Com-3	8	PS-Com-3	10
PS-Com-4	1	PS-Com-4	7	PS-Com-4	8	PS-Com-4	10
PS-Com-5	1	PS-Com-5	7	PS-Com-5	8	PS-Com-5	10
PS-Com-6	1	PS-Com-6	7	PS-Com-6	8	PS-Com-6	10
PS-Com-7	1	PS-Com-7	7	PS-Com-7	8	PS-Com-7	10
PS-Com-8	1	PS-Com-8	7	PS-Com-8	8	PS-Com-8	10
PS-Com-9	1	PS-Com-9	7	PS-Com-9	8	PS-Com-9	10
PS-Com-10	1	PS-Com-10	7	PS-Com-10	8	PS-Com-10	10
PS-Com-11	1	PS-Com-11	7	PS-Com-11	8	PS-Com-11	10
LY-01	4	LY-01	2	LY-01	4	LY-01	9
LY-02	4	LY-02	2	LY-02	4	LY-02	9
LY-03	1	LY-03	7	LY-03	8	LY-03	10
LY-04	1	LY-04	1	LY-04	1	LY-04	1
LY-05	4	LY-05	2	LY-05	4	LY-05	9
LY-06	5	LY-06	6	LY-06	7	LY-06	8
LY-07	4	LY-07	2	LY-07	4	LY-07	9
LY-08	1	LY-08	5	LY-08	3	LY-08	2
LY-09	7	LY-09	3	LY-09	5	LY-09	5
MAG-01	1	MAG-01	1	MAG-01	1	MAG-01	1
MAG-02	5	MAG-02	6	MAG-02	7	MAG-02	8
MAG-04	4	MAG-04	2	MAG-04	4	MAG-04	9
MAG-05	1	MAG-05	7	MAG-05	8	MAG-05	10
MU-01	4	MU-01	2	MU-01	4	MU-01	9
MU-02	1	MU-02	1	MU-02	1	MU-02	1
MU-03	1	MU-03	1	MU-03	1	MU-03	1
MU-04	1	MU-04	7	MU-04	8	MU-04	10
MU-05	1	MU-05	1	MU-05	1	MU-05	1
MU-06	1	MU-06	7	MU-06	8	MU-06	10
MU-07	1	MU-07	7	MU-07	8	MU-07	10
MU-08	4	MU-08	2	MU-08	4	MU-08	9
MU-09	1	MU-09	7	MU-09	8	MU-09	10
