# Supplementary material for: Screening of polymer types and chemical weathering in macro- and meso-plastics found on lake and river beaches using a combined chemometric approach
Source: Royal Society of Chemistry journal article supplement (doi:10.1039/d2ay01201d), 2022-01-01
Supplement: d2ay01201d2.xlsx [file d2ay01201d2.xlsx]

## Sheet: BeachSamples
Wavenumber	LB-1-1	LB-1-2	LB-1-3	LB-2-1	LB-2-2	LB-2-3	LB-4-1	LB-4-2	LB-4-3	LB-5-1	LB-5-2	LB-5-3	LB-6-1	LB-6-2	LB-6-3	LB-7-1	LB-7-2	LB-7-3	LB-8-1	LB-8-2	LB-8-3	LB-9-1	LB-9-2	LB-9-3	LB-10-1	LB-10-2	LB-10-3	LB-11-1	LB-11-2	LB-11-3	LB-12-1	LB-12-2	LB-12-3	LB-13-1	LB-13-2	LB-13-3	LB-14-1	LB-14-2	LB-14-3	LB-15-1	LB-15-2	LB-15-3	LB-17-1	LB-17-2	LB-17-3	LB-20-1	LB-20-2	LB-20-3	LB-21-1
3999.43	99.102	99.1657	99.1589	98.1526	99.0966	98.9805	97.1545	97.5787	98.0209	94.1694	95.7378	95.8942	95.4511	96.4139	96.2727	98.3838	97.5259	97.3209	97.4758	96.3181	97.9493	99.2025	99.6634	99.2215	97.7043	97.755	98.0953	96.5225	97.7728	97.8111	91.2554	98.0966	97.4774	98.7184	96.737	97.6876	97.2138	97.341	97.003	98.4311	97.763	97.9877	97.187	99.1583	97.6016	98.9234	99.0056	99.0594	97.8308
3997.57	99.0931	99.1505	99.1385	98.1279	99.1363	99.0071	97.1818	97.624	98.0237	94.2166	95.7453	95.9275	95.4085	96.4119	96.3067	98.4186	97.5678	97.3631	97.491	96.2876	97.9424	99.0933	99.6018	99.2235	97.675	97.7863	98.1088	96.4953	97.8023	97.7686	91.2558	98.0503	97.5051	98.6674	96.7239	97.7178	97.171	97.2874	97.0061	98.538	97.7413	97.9705	97.2117	99.1552	97.582	98.923	98.9847	99.0823	97.8565
3995.71	99.0582	99.1086	99.1068	98.1059	99.1104	99.0208	97.1923	97.6325	98.0546	94.2334	95.7887	95.9426	95.4471	96.4054	96.3351	98.4657	97.5909	97.3898	97.4901	96.2954	97.9428	99.0828	99.5696	99.2459	97.7145	97.8687	98.0954	96.4279	97.8348	97.7391	91.2419	98.0191	97.5314	98.7353	96.6422	97.6682	97.1611	97.2737	97.02	98.5569	97.7473	97.9669	97.226	99.1589	97.6134	98.9429	98.9988	99.1338	97.8183
3993.84	99.0482	99.0837	99.0624	98.0993	99.0803	99.0181	97.1607	97.657	98.0459	94.1971	95.8142	95.904	95.483	96.4483	96.3148	98.48	97.5747	97.384	97.5199	96.3179	97.9564	99.1295	99.5996	99.254	97.763	97.8791	98.0778	96.4274	97.8343	97.7552	91.2288	98.0279	97.5197	98.7868	96.6547	97.6354	97.1954	97.2824	97.0211	98.5357	97.7367	97.99	97.1993	99.1066	97.6312	98.9641	99.0349	99.1077	97.7993
3991.98	99.0715	99.1035	99.0383	98.1378	99.0546	98.978	97.1706	97.6781	98.0528	94.1683	95.8444	95.8488	95.4863	96.4272	96.3003	98.4686	97.5665	97.3585	97.541	96.3099	97.9424	99.1866	99.5879	99.2155	97.7815	97.8691	98.0908	96.4382	97.8033	97.792	91.2529	98.0274	97.4836	98.7422	96.7259	97.6513	97.1971	97.3431	97.0515	98.5003	97.6993	98.0052	97.228	99.0634	97.5948	98.9959	99.0474	99.094	97.8797
3990.12	99.1002	99.1298	99.0815	98.1973	99.0428	98.9933	97.1856	97.6515	98.0832	94.1627	95.853	95.8662	95.5289	96.3568	96.3075	98.425	97.573	97.3744	97.4905	96.2964	97.9225	99.1935	99.5336	99.1756	97.7661	97.8947	98.1444	96.4608	97.7961	97.8599	91.2749	98.0145	97.484	98.7354	96.7584	97.6454	97.1855	97.3549	97.0638	98.4694	97.6928	97.9787	97.2594	99.137	97.5457	99.0489	99.0357	99.1148	97.9306
3988.25	99.0872	99.0944	99.1313	98.216	99.0438	99.0577	97.1833	97.6165	98.1284	94.2037	95.8126	95.9362	95.5448	96.3538	96.3431	98.4399	97.5778	97.3922	97.4706	96.3337	97.9282	99.1839	99.5262	99.1887	97.7628	97.9043	98.1821	96.507	97.8209	97.8864	91.2909	98.0385	97.5469	98.8015	96.731	97.6348	97.1818	97.3357	97.0062	98.4445	97.6954	97.9618	97.2417	99.1893	97.5332	99.0712	99.0581	99.0943	97.9281
3986.39	99.0843	99.0697	99.1386	98.2208	99.0447	99.0517	97.2	97.597	98.1176	94.2537	95.8165	95.9538	95.4752	96.3735	96.3583	98.4535	97.5504	97.3431	97.4863	96.3779	97.9136	99.2082	99.5629	99.207	97.795	97.8416	98.1531	96.4986	97.8185	97.8112	91.3302	98.0737	97.5729	98.8638	96.7321	97.6174	97.1676	97.3544	96.9781	98.4709	97.6713	97.9501	97.2193	99.1659	97.5798	99.0275	99.0513	99.1034	97.9242
3984.52	99.1187	99.1002	99.0887	98.2054	99.0834	99.0453	97.1936	97.6016	98.0974	94.2458	95.8311	95.9032	95.431	96.3757	96.3243	98.4254	97.5524	97.3518	97.4795	96.3506	97.9142	99.2161	99.6079	99.2387	97.795	97.8353	98.0808	96.4972	97.8121	97.7673	91.3576	98.0674	97.5412	98.8889	96.7573	97.6555	97.1795	97.348	96.9958	98.5188	97.7251	97.9548	97.2195	99.173	97.6119	98.9982	99.0456	99.1289	97.8659
3982.66	99.1212	99.1844	99.0606	98.1862	99.1194	99.0423	97.1726	97.6053	98.1021	94.2164	95.827	95.864	95.4436	96.392	96.3146	98.4243	97.5805	97.4067	97.465	96.2764	97.9606	99.1994	99.6026	99.2325	97.7751	97.8852	98.0692	96.5236	97.8357	97.7877	91.3286	98.0448	97.5476	98.883	96.7496	97.7016	97.1596	97.3216	97.0193	98.4937	97.7398	97.988	97.2118	99.1746	97.6312	98.9941	99.0394	99.1135	97.8504
3980.8	99.0921	99.2484	99.1093	98.1627	99.0971	98.999	97.1902	97.6321	98.0883	94.2111	95.8514	95.9188	95.4759	96.4414	96.3432	98.4292	97.5919	97.3896	97.472	96.2711	97.9708	99.1678	99.5933	99.1809	97.7552	97.8834	98.1516	96.5043	97.8518	97.8062	91.3023	98.0812	97.5739	98.8421	96.7346	97.6897	97.1343	97.2853	97.0424	98.4795	97.7229	97.9831	97.1692	99.1938	97.6349	98.9836	99.0361	99.0997	97.8868
3978.93	99.0428	99.238	99.1489	98.1306	99.0943	98.9887	97.2297	97.6578	98.1338	94.2224	95.8803	95.9583	95.508	96.4694	96.3603	98.4769	97.5632	97.3246	97.4884	96.2931	97.9273	99.1804	99.611	99.1794	97.7474	97.8689	98.1903	96.4569	97.8509	97.8042	91.316	98.1279	97.5541	98.8085	96.7371	97.6659	97.1375	97.303	97.0472	98.5392	97.7062	97.9585	97.2323	99.2084	97.6141	98.9931	99.085	99.0897	97.9119
3977.07	99.0426	99.1899	99.1387	98.1436	99.121	99.0143	97.2529	97.6605	98.1345	94.2437	95.8543	95.9157	95.4948	96.4547	96.3775	98.4767	97.5715	97.3351	97.4984	96.3069	97.9209	99.197	99.6193	99.1935	97.753	97.8731	98.1466	96.4249	97.8493	97.8389	91.2847	98.1177	97.4916	98.8056	96.7624	97.6603	97.1459	97.3275	97.02	98.56	97.7098	97.9456	97.3303	99.1675	97.5911	99.0029	99.0663	99.1144	97.9141
3975.21	99.0795	99.1607	99.1362	98.1593	99.1185	99.0195	97.2489	97.6545	98.1204	94.2747	95.831	95.8723	95.4916	96.4215	96.385	98.4143	97.5723	97.365	97.5038	96.3138	97.9214	99.1511	99.626	99.2211	97.7793	97.8747	98.1252	96.4482	97.8159	97.8518	91.2581	98.0812	97.4847	98.8042	96.8219	97.6744	97.1914	97.3107	96.9989	98.5075	97.7148	97.9466	97.3181	99.1289	97.5837	98.9852	99.0299	99.1214	97.8791
3973.34	99.1038	99.1951	99.1268	98.1475	99.0901	99.0035	97.2005	97.6843	98.1422	94.2918	95.8625	95.9078	95.5231	96.423	96.3565	98.4192	97.5485	97.3504	97.4786	96.3421	97.9295	99.1525	99.6286	99.2468	97.7921	97.8994	98.1253	96.4773	97.8005	97.8096	91.2438	98.0691	97.4983	98.8232	96.8346	97.7078	97.2395	97.3576	97.0027	98.4727	97.6557	98.0036	97.2708	99.1509	97.6183	99.0074	99.0703	99.1454	97.8671
3971.48	99.1208	99.2476	99.1312	98.157	99.088	99.0065	97.1753	97.6839	98.1051	94.3145	95.8654	95.9482	95.5696	96.4416	96.3574	98.4525	97.5841	97.3757	97.4639	96.3492	97.9192	99.183	99.5762	99.2792	97.7663	97.9389	98.1355	96.4968	97.7978	97.7859	91.2719	98.0721	97.5322	98.7916	96.7909	97.7321	97.1902	97.4029	96.991	98.485	97.6594	98.0171	97.2369	99.1551	97.6477	99.0398	99.0579	99.1822	97.8721
3969.61	99.1382	99.2592	99.1346	98.1736	99.1155	99.0044	97.2335	97.6806	98.0851	94.3042	95.8231	95.921	95.5715	96.4261	96.3493	98.4609	97.6033	97.436	97.5233	96.3799	97.9357	99.1638	99.5062	99.2971	97.7612	97.9632	98.1363	96.5153	97.8051	97.7833	91.3541	98.0657	97.5942	98.7642	96.7689	97.6812	97.1513	97.3532	97.0395	98.4684	97.7255	97.989	97.2465	99.1286	97.6741	99.0533	99	99.1753	97.9056
3967.75	99.1282	99.2569	99.1327	98.1919	99.1134	99.0065	97.274	97.6691	98.1009	94.2845	95.834	95.9325	95.5302	96.3893	96.3372	98.4424	97.6178	97.4425	97.5375	96.4028	97.974	99.1864	99.4988	99.2893	97.7823	97.9373	98.1429	96.4944	97.8524	97.848	91.3573	98.0775	97.5905	98.8091	96.7498	97.6359	97.1667	97.3445	97.0745	98.5048	97.7298	97.94	97.2815	99.1677	97.6776	99.0613	99.0033	99.1295	97.9362
3965.89	99.1577	99.2062	99.1134	98.1794	99.072	99.0137	97.2121	97.6735	98.1076	94.2392	95.8645	95.9425	95.5022	96.3942	96.378	98.4346	97.6355	97.3963	97.5325	96.3758	97.9598	99.2379	99.5285	99.2693	97.819	97.8928	98.1648	96.4907	97.86	97.8709	91.3185	98.0651	97.521	98.8303	96.7753	97.7088	97.2032	97.3493	97.0446	98.5778	97.7575	97.9138	97.2752	99.1826	97.6862	99.0056	99.0363	99.1189	97.954
3964.02	99.104	99.1798	99.1364	98.1425	99.0725	99.0336	97.1823	97.6727	98.1025	94.2426	95.8695	95.9314	95.4972	96.4385	96.3955	98.4654	97.6285	97.3683	97.4979	96.312	97.9388	99.2632	99.5697	99.2593	97.8149	97.8838	98.1755	96.5586	97.8342	97.8131	91.295	98.0547	97.4941	98.7702	96.8035	97.73	97.2358	97.3623	96.9979	98.5549	97.7546	97.9376	97.2335	99.1369	97.6547	98.9092	99.0459	99.1542	97.9436
3962.16	99.0682	99.2063	99.1933	98.14	99.0932	99.0295	97.1836	97.6709	98.1302	94.2754	95.8582	95.9546	95.5025	96.4531	96.3539	98.4826	97.608	97.4077	97.492	96.3216	97.933	99.2497	99.5871	99.2268	97.7902	97.8952	98.1757	96.5453	97.8245	97.8245	91.2798	98.0699	97.4969	98.7747	96.7545	97.6598	97.2088	97.3349	97.0306	98.5159	97.7243	97.9761	97.227	99.1528	97.5916	98.9305	99.0062	99.1216	97.9628
3960.3	99.0501	99.2087	99.2348	98.1732	99.1237	99.0217	97.2175	97.6811	98.1057	94.2763	95.8762	95.9689	95.5315	96.4418	96.3203	98.4748	97.5988	97.4604	97.5156	96.3535	97.891	99.1921	99.617	99.1985	97.8066	97.9159	98.1648	96.4836	97.8368	97.8478	91.3248	98.0841	97.5222	98.8083	96.6892	97.6469	97.1929	97.3001	97.0465	98.5075	97.7121	97.9706	97.2655	99.1912	97.5774	99.0002	99.0074	99.0838	97.9625
3958.43	99.099	99.1647	99.2347	98.1931	99.1395	99.0501	97.2716	97.7012	98.0868	94.2328	95.9123	95.9378	95.5105	96.4261	96.3512	98.4638	97.5986	97.4279	97.5104	96.3414	97.9071	99.14	99.6547	99.2291	97.8115	97.9214	98.131	96.4908	97.8447	97.844	91.3644	98.0841	97.5833	98.7986	96.739	97.6915	97.2151	97.3513	96.9902	98.5096	97.7407	97.9283	97.3172	99.1776	97.6324	98.9572	99.0335	99.1873	97.8992
3956.57	99.169	99.1265	99.2334	98.1946	99.1065	98.9961	97.2811	97.6882	98.1335	94.2502	95.9103	95.9051	95.4592	96.4238	96.4048	98.4298	97.5846	97.3606	97.5206	96.3304	97.9061	99.1592	99.5976	99.2547	97.8015	97.9119	98.1228	96.4654	97.8371	97.8442	91.3255	98.0756	97.61	98.8032	96.7907	97.6898	97.2223	97.3661	96.9944	98.4634	97.7219	97.8909	97.3282	99.1595	97.6534	98.9327	99.0465	99.2245	97.843
3954.71	99.1928	99.1558	99.2338	98.1572	99.0645	98.9406	97.2354	97.6314	98.1316	94.2755	95.8714	95.9114	95.498	96.442	96.4187	98.4575	97.6164	97.3391	97.4896	96.3525	97.9033	99.1603	99.5534	99.2382	97.8007	97.8806	98.1681	96.4607	97.8535	97.8437	91.2654	98.0707	97.5548	98.834	96.7954	97.6592	97.1676	97.338	97.0499	98.4396	97.7095	97.8635	97.3127	99.1675	97.6249	98.981	99.0273	99.1502	97.857
3952.84	99.0975	99.225	99.1858	98.1177	99.0797	99.0054	97.2042	97.6647	98.0951	94.2429	95.8629	95.9258	95.5578	96.4782	96.3922	98.5348	97.6429	97.3181	97.4589	96.3372	97.9332	99.1296	99.595	99.1911	97.7987	97.8703	98.2061	96.4932	97.8412	97.8504	91.2751	98.0618	97.4967	98.81	96.7964	97.6517	97.1625	97.3411	97.061	98.492	97.745	97.9123	97.2505	99.192	97.6378	99.0333	99.0206	99.1085	97.9309
3950.98	99.0478	99.2139	99.1295	98.1062	99.1212	99.0531	97.2297	97.742	98.1012	94.2137	95.8746	95.9084	95.5585	96.5115	96.3756	98.524	97.6369	97.3395	97.4943	96.3307	97.9334	99.1308	99.6301	99.1917	97.818	97.9262	98.1969	96.5268	97.8181	97.8495	91.3001	98.0604	97.5594	98.8246	96.7984	97.6757	97.2088	97.3527	97.0535	98.577	97.7181	98.0142	97.2507	99.2008	97.6704	99.0228	99.0421	99.1141	98.003
3949.11	99.0374	99.1977	99.1428	98.1152	99.1362	99.036	97.242	97.7138	98.1317	94.2321	95.8346	95.8345	95.5639	96.4916	96.3921	98.4779	97.6196	97.359	97.4962	96.3247	97.9137	99.1428	99.6187	99.2476	97.8223	97.9682	98.1616	96.4835	97.838	97.8402	91.2906	98.0574	97.6348	98.8518	96.7763	97.6892	97.1971	97.3268	97.0233	98.5732	97.683	97.9795	97.2837	99.2023	97.6799	98.9614	99.0119	99.1219	98.0034
3947.25	99.1065	99.2067	99.1722	98.1786	99.1292	99.0202	97.1924	97.658	98.1195	94.2705	95.7768	95.7994	95.5656	96.4594	96.3873	98.4394	97.601	97.3467	97.4773	96.3208	97.9583	99.1622	99.5571	99.2573	97.8247	97.9679	98.1478	96.4746	97.858	97.8213	91.2599	98.0219	97.6039	98.844	96.7766	97.7322	97.1841	97.294	96.9721	98.4646	97.7279	97.9001	97.292	99.1683	97.6911	98.9955	99.0064	99.1247	97.9688
3945.39	99.0658	99.2092	99.1698	98.2269	99.09	99.0187	97.2112	97.668	98.1184	94.2782	95.8294	95.888	95.5413	96.4772	96.3709	98.4174	97.597	97.3905	97.5221	96.3763	97.9951	99.175	99.5363	99.238	97.8396	97.919	98.1731	96.5886	97.8397	97.8218	91.2915	98.0827	97.5647	98.7761	96.811	97.7684	97.1947	97.3494	97.0143	98.4865	97.7717	97.9321	97.3126	99.167	97.7289	99.0474	99.0817	99.1062	97.9064
3943.52	99.0614	99.2337	99.148	98.1827	99.0941	99.0422	97.2857	97.7497	98.1334	94.2927	95.9062	95.9803	95.5312	96.4858	96.3529	98.4406	97.6369	97.4512	97.5463	96.3867	97.9518	99.1698	99.5542	99.2244	97.8336	97.8843	98.2128	96.5644	97.8128	97.8205	91.3669	98.1614	97.5437	98.7748	96.8197	97.7498	97.2003	97.3915	97.059	98.5226	97.7759	97.9456	97.2936	99.1843	97.7077	99.0365	99.0699	99.0925	97.8571
3941.66	99.1398	99.2247	99.1096	98.1157	99.0991	99.0909	97.3086	97.7397	98.1805	94.3303	95.9472	96.0247	95.5367	96.48	96.3401	98.4743	97.6645	97.4332	97.5114	96.3599	97.9138	99.1959	99.5711	99.2264	97.8354	97.9162	98.2234	96.493	97.8214	97.8243	91.4198	98.089	97.4957	98.8478	96.8142	97.7165	97.1994	97.3597	97.0758	98.4892	97.7937	97.9823	97.2686	99.1716	97.6453	99.0299	99.0299	99.1258	97.9295
3939.8	99.1315	99.1895	99.1167	98.0713	99.0674	99.0746	97.2686	97.6799	98.16	94.3131	95.8833	95.9901	95.5673	96.4795	96.3674	98.4538	97.6625	97.3932	97.5084	96.3658	97.9077	99.2154	99.5767	99.2711	97.8244	97.9273	98.1998	96.4552	97.8578	97.839	91.4063	98.0714	97.5086	98.8419	96.808	97.6736	97.2015	97.3382	97.0813	98.5043	97.7898	98.0001	97.2651	99.171	97.6625	98.9925	99.0157	99.1787	97.9772
3937.93	99.0821	99.1749	99.2003	98.0931	99.068	99.0172	97.2317	97.6503	98.0879	94.2688	95.8371	95.8766	95.5514	96.4491	96.3843	98.4472	97.6256	97.337	97.532	96.3371	97.908	99.1409	99.5181	99.301	97.7759	97.9093	98.1819	96.4279	97.8741	97.8259	91.2944	98.0729	97.5478	98.808	96.781	97.6381	97.1748	97.3128	97.0222	98.4755	97.7566	97.9479	97.2546	99.197	97.6829	98.9378	99.024	99.1811	97.9416
3936.07	99.1011	99.1763	99.1957	98.1192	99.0729	99.008	97.2623	97.6357	98.0828	94.2436	95.8862	95.8903	95.4925	96.4244	96.3597	98.4469	97.5805	97.291	97.5429	96.3141	97.9026	99.1143	99.4513	99.2576	97.7489	97.9396	98.1566	96.4643	97.8338	97.838	91.24	98.0096	97.5103	98.805	96.761	97.6889	97.1958	97.2767	96.983	98.4982	97.6783	97.9038	97.2797	99.1992	97.6459	98.9806	99.0515	99.1669	97.9215
3934.21	99.0486	99.2149	99.1465	98.117	99.0579	99.0094	97.2679	97.638	98.1575	94.2343	95.9099	95.9598	95.5213	96.4808	96.3598	98.4459	97.5722	97.32	97.5245	96.3035	97.9024	99.2038	99.4919	99.2169	97.7639	97.9351	98.1369	96.4938	97.8131	97.8581	91.3092	98.0062	97.5066	98.8071	96.7966	97.7343	97.2589	97.3249	97.01	98.5611	97.6423	97.9301	97.2747	99.1827	97.6234	99.0305	99.0511	99.1381	97.9179
3932.34	99.0274	99.1988	99.0986	98.1578	99.0489	98.991	97.2208	97.6572	98.1822	94.249	95.8867	95.9463	95.5531	96.5098	96.3779	98.4661	97.5542	97.3744	97.5099	96.3249	97.928	99.2484	99.5852	99.2396	97.765	97.8813	98.1419	96.5392	97.8865	97.8605	91.4022	98.0574	97.5674	98.7991	96.8398	97.738	97.278	97.315	97.0195	98.5667	97.7331	97.9982	97.2664	99.2047	97.6281	99.0133	99.0172	99.0766	97.9282
3930.48	98.9937	99.1703	99.1059	98.1501	99.0679	98.9837	97.1484	97.6608	98.1344	94.2632	95.8799	95.9388	95.5251	96.4827	96.4324	98.5067	97.5544	97.3781	97.5171	96.3128	97.9558	99.244	99.6392	99.2802	97.7528	97.8757	98.17	96.5283	97.9049	97.8412	91.3695	98.0984	97.5777	98.8083	96.8028	97.7031	97.2188	97.2723	96.9743	98.5202	97.7458	97.9476	97.2716	99.2413	97.6413	98.9501	99.0127	99.102	97.936
3928.61	99.0942	99.1523	99.1257	98.127	99.06	98.9731	97.1703	97.6527	98.1415	94.2317	95.8962	95.9168	95.4849	96.4688	96.4317	98.5209	97.6031	97.3923	97.5034	96.3098	97.9441	99.2259	99.5905	99.2745	97.7801	97.886	98.1764	96.4653	97.8365	97.8249	91.3119	98.0867	97.5465	98.7914	96.7601	97.7215	97.1836	97.3084	97.0029	98.5164	97.7148	97.9342	97.2812	99.2045	97.6239	98.9811	99.0369	99.1763	97.9481
3926.75	99.1033	99.1608	99.1555	98.1515	99.0678	99.0076	97.2462	97.678	98.1576	94.2779	95.9151	95.9159	95.503	96.4431	96.418	98.4915	97.6239	97.4037	97.4524	96.354	97.8837	99.2171	99.5607	99.2534	97.8375	97.8643	98.169	96.4941	97.8396	97.8488	91.3208	98.0978	97.5821	98.8052	96.7792	97.73	97.1979	97.3365	97.0568	98.5077	97.7412	97.949	97.2919	99.144	97.66	99.0496	99.0481	99.1572	97.9287
3924.89	99.144	99.166	99.147	98.1361	99.0947	99.0087	97.2287	97.6983	98.1225	94.3071	95.8586	95.8945	95.5555	96.4117	96.4172	98.4639	97.5987	97.3658	97.4195	96.3534	97.9243	99.1641	99.5661	99.2119	97.8494	97.8418	98.1673	96.4672	97.8859	97.8489	91.2997	98.0907	97.5793	98.8334	96.7943	97.6721	97.1494	97.3147	97.0323	98.4924	97.7521	97.9312	97.3176	99.1368	97.7061	99.0293	99.0246	99.0809	97.9193
3923.02	99.0879	99.1566	99.1413	98.1034	99.0606	99.0094	97.1979	97.6945	98.0594	94.2674	95.8425	95.8729	95.5892	96.4132	96.4185	98.4076	97.5633	97.3437	97.4756	96.3543	97.9763	99.1234	99.5599	99.2405	97.779	97.8635	98.148	96.4146	97.852	97.7741	91.2718	98.0299	97.5412	98.864	96.782	97.6128	97.1441	97.3113	97.0152	98.5181	97.7471	97.8888	97.3406	99.1286	97.6752	98.9596	99.018	99.0457	97.9304
3921.16	99.0424	99.1707	99.1806	98.1136	99.0244	99.0393	97.1992	97.6896	98.05	94.2074	95.8496	95.8741	95.5725	96.4623	96.3822	98.4518	97.5706	97.3854	97.524	96.3771	97.9368	99.1632	99.5136	99.274	97.7549	97.9559	98.1426	96.4708	97.8662	97.754	91.2741	97.9793	97.5519	98.839	96.7788	97.6372	97.1433	97.3217	97.0383	98.5794	97.6939	97.8666	97.3393	99.0943	97.5972	98.9862	99.0679	99.0658	97.9311
3919.3	99.0317	99.1845	99.188	98.1525	99.0331	99.004	97.2708	97.7319	98.1444	94.294	95.9111	95.9638	95.5418	96.5386	96.3135	98.5387	97.6196	97.4503	97.5197	96.3898	97.8969	99.2631	99.5377	99.2436	97.7856	98.0275	98.1437	96.5742	97.9153	97.8899	91.373	98.0433	97.5828	98.8269	96.7972	97.7734	97.1482	97.3664	97.086	98.5912	97.679	97.949	97.316	99.1064	97.6354	99.0625	99.0972	99.1193	97.9407
3917.43	99.0434	99.1931	99.1617	98.1688	99.0854	98.99	97.2701	97.736	98.1827	94.3705	95.9612	96.0343	95.5623	96.5254	96.3712	98.5188	97.6629	97.4529	97.5105	96.4131	97.9298	99.2994	99.6226	99.231	97.8351	97.9967	98.1727	96.599	97.8774	97.9089	91.4301	98.1006	97.579	98.849	96.8401	97.8029	97.1933	97.392	97.08	98.4974	97.745	98.0034	97.294	99.1415	97.6522	99.0696	99.0418	99.1443	97.9428
3915.57	99.1424	99.1508	99.127	98.1398	99.1281	99.0021	97.241	97.7304	98.1395	94.3283	96.0121	96.0273	95.5438	96.484	96.4497	98.4581	97.6408	97.4404	97.5277	96.4435	97.9465	99.2774	99.6092	99.2647	97.8877	98.0034	98.2132	96.592	97.8187	97.8293	91.3986	98.0867	97.5746	98.8719	96.8366	97.7387	97.24	97.3976	97.0661	98.5082	97.8301	97.9798	97.2951	99.2006	97.6828	99.086	99.065	99.1541	97.9554
3913.7	99.2173	99.1436	99.1406	98.134	99.1324	99.0027	97.2521	97.7315	98.1453	94.344	96.005	96.0571	95.5473	96.4861	96.4247	98.4423	97.659	97.4072	97.525	96.4106	97.9438	99.2679	99.5795	99.2935	97.8778	98.0159	98.2568	96.5635	97.7996	97.8162	91.384	98.1164	97.5994	98.8627	96.8396	97.6879	97.2772	97.3902	97.0428	98.5336	97.8427	97.9705	97.291	99.2217	97.6986	99.0556	99.0709	99.1179	97.9765
3911.84	99.2288	99.1987	99.1812	98.1301	99.1166	99.04	97.256	97.6912	98.2023	94.3319	95.8816	96.017	95.593	96.4777	96.4179	98.4296	97.6809	97.3378	97.5191	96.3248	97.951	99.1881	99.5558	99.2687	97.808	97.9506	98.2471	96.4726	97.8266	97.8277	91.3187	98.1599	97.6146	98.8659	96.8194	97.6774	97.2602	97.3364	97.0299	98.5008	97.7816	97.9734	97.3076	99.2086	97.6546	98.9618	99.0488	99.0858	97.9691
3909.98	99.1802	99.2127	99.1765	98.0903	99.1063	99.0683	97.1715	97.6521	98.1196	94.1965	95.7036	95.896	95.5527	96.3902	96.4284	98.4354	97.6445	97.2526	97.4865	96.2984	97.918	99.0591	99.5311	99.2698	97.7749	97.8272	98.1994	96.3713	97.8622	97.8487	91.2118	98.0868	97.5681	98.8428	96.7061	97.6222	97.1668	97.2248	96.9729	98.4513	97.6763	97.8629	97.3055	99.1951	97.6581	98.847	98.9732	99.0737	97.8989
3908.11	99.1205	99.1336	99.117	98.0405	99.0894	98.9657	97.0859	97.6613	98.0357	94.0846	95.6353	95.8045	95.4327	96.302	96.3333	98.4575	97.6008	97.2299	97.4033	96.2934	97.8538	99.0114	99.5201	99.2809	97.7681	97.7067	98.1378	96.3831	97.8555	97.8386	91.1086	97.9644	97.4537	98.8372	96.6639	97.6106	97.0763	97.1816	96.8761	98.4667	97.615	97.791	97.2681	99.1759	97.6491	98.8496	98.9252	99.0543	97.8751
3906.25	98.9508	99.1043	99.0928	98.0224	99.0907	98.8933	97.1356	97.6531	98.0427	94.0856	95.7193	95.848	95.4633	96.34	96.3124	98.4298	97.5372	97.2914	97.4038	96.2878	97.823	99.0851	99.54	99.259	97.7367	97.7135	98.0908	96.4764	97.8305	97.7998	91.1369	98.041	97.4791	98.7909	96.72	97.622	97.0256	97.1868	96.8712	98.4205	97.6753	97.8472	97.2252	99.1374	97.5719	98.9145	98.9903	99.0337	97.9444
3904.39	98.901	99.1486	99.0714	98.0511	99.0864	98.931	97.2127	97.5971	98.0065	94.1419	95.7655	95.8514	95.5011	96.4018	96.4105	98.4462	97.5272	97.3367	97.4664	96.3189	97.8581	99.1625	99.5629	99.234	97.7167	97.845	98.0829	96.5324	97.8018	97.7881	91.1514	98.1041	97.5106	98.7662	96.7606	97.6426	97.0775	97.218	96.9555	98.3596	97.6519	97.8344	97.2043	99.0533	97.5608	98.9021	99.0288	99.0957	97.9714
3902.52	98.8769	99.1774	99.0892	98.1518	99.0488	98.972	97.2934	97.6793	98.0991	94.2681	95.8989	95.9121	95.5078	96.5045	96.4376	98.4823	97.5973	97.4106	97.5725	96.3963	97.9113	99.19	99.6336	99.2085	97.7726	98.0034	98.0978	96.6525	97.7837	97.8412	91.227	98.0801	97.5619	98.8247	96.8539	97.6932	97.1559	97.3997	97.0726	98.4393	97.633	97.8706	97.3096	99.0502	97.618	98.9951	99.1114	99.1662	97.9771
3900.66	98.8378	99.2269	99.1637	98.2502	99.0391	99.0098	97.3404	97.7514	98.1607	94.3803	96.0192	96.0455	95.6114	96.5752	96.463	98.4825	97.6487	97.4924	97.5831	96.4578	97.9621	99.2443	99.6574	99.2335	97.8582	98.0318	98.1786	96.6655	97.7686	97.852	91.4044	98.0898	97.6197	98.8411	96.8789	97.6972	97.2108	97.4727	97.1185	98.5007	97.6546	97.9759	97.3885	99.1217	97.6191	99.0998	99.1679	99.1256	97.9938
3898.8	98.99	99.2044	99.1674	98.1776	99.0598	99.0219	97.3095	97.7363	98.1084	94.3717	95.9837	96.0834	95.6694	96.4773	96.4945	98.4636	97.656	97.4601	97.514	96.4412	97.9665	99.2493	99.6192	99.2417	97.8837	97.9201	98.231	96.4975	97.8302	97.8422	91.4413	98.132	97.5993	98.8478	96.7999	97.6744	97.2437	97.4022	97.1129	98.5074	97.7355	98.0067	97.4048	99.1945	97.6578	99.0405	99.082	99.0572	98.0074
3896.93	99.0761	99.1756	99.1525	98.0561	99.1225	99.0067	97.2444	97.6594	98.0626	94.2896	95.8803	96.0179	95.6089	96.3919	96.4163	98.4817	97.6169	97.3464	97.4499	96.3406	97.9047	99.1589	99.5756	99.2395	97.8484	97.8439	98.2123	96.3768	97.8911	97.8522	91.3832	98.0895	97.5035	98.8771	96.7351	97.6726	97.2027	97.301	97.0401	98.442	97.808	97.9761	97.326	99.2323	97.6743	98.9371	98.9715	99.0314	97.9704
3895.07	99.1122	99.1771	99.1248	98.0915	99.1014	98.9951	97.2469	97.6775	98.1223	94.2268	95.8679	95.9878	95.493	96.5033	96.3426	98.5383	97.5994	97.3822	97.4549	96.3167	97.9236	99.1395	99.531	99.2383	97.8545	97.9453	98.1818	96.4965	97.8486	97.8357	91.3264	98.0268	97.3978	98.8695	96.7947	97.7176	97.2087	97.313	97.0592	98.467	97.7321	97.9633	97.2653	99.1574	97.652	98.9614	99.0858	99.1062	97.9494
3893.2	98.995	99.1725	99.1463	98.1234	99.094	98.9985	97.31	97.7835	98.2303	94.3591	95.9884	96.0518	95.474	96.5859	96.4367	98.5029	97.5888	97.5009	97.5211	96.4169	97.96	99.2472	99.5478	99.2744	97.8641	98.0062	98.1681	96.6142	97.8619	97.8563	91.422	98.096	97.509	98.8156	96.8906	97.7325	97.2966	97.3986	97.1457	98.554	97.7332	97.98	97.3305	99.1581	97.6602	99.0029	99.1837	99.1928	97.9716
3891.34	99.0676	99.205	99.1741	98.0726	99.1939	98.9922	97.1409	97.6904	98.1359	94.2933	95.8734	95.9924	95.4711	96.4029	96.4682	98.4289	97.5884	97.4287	97.4368	96.3894	97.9383	99.1827	99.5554	99.289	97.8087	97.8721	98.1847	96.4746	97.8595	97.8767	91.3814	98.0387	97.6172	98.8148	96.7921	97.6041	97.3109	97.2831	96.9899	98.4916	97.7729	97.8991	97.3225	99.2275	97.6679	98.9547	99.0403	99.0858	97.9238
3889.48	99.3366	99.2045	99.1058	98.0593	99.1511	98.982	97.1342	97.6431	98.0975	94.1428	95.8052	95.9244	95.4327	96.3838	96.3821	98.447	97.609	97.4077	97.4271	96.364	97.9114	99.0981	99.5421	99.2427	97.7846	97.8708	98.1857	96.436	97.7925	97.8328	91.1994	97.9355	97.5898	98.7932	96.7813	97.6288	97.2484	97.2778	96.9432	98.4668	97.7243	97.9143	97.2703	99.1649	97.6031	99.0048	99.0293	99.0511	97.9008
3887.61	99.1004	99.1765	99.1166	98.0547	99.085	99.0327	97.256	97.748	98.1095	94.2533	95.961	95.9587	95.5245	96.5434	96.4044	98.4912	97.6328	97.425	97.4691	96.3356	97.9317	99.1957	99.6319	99.254	97.8271	97.9557	98.1765	96.5186	97.7941	97.8224	91.3273	98.0463	97.5963	98.8182	96.8534	97.7108	97.2468	97.401	97.0116	98.463	97.6727	97.9724	97.3315	99.1205	97.6389	99.0311	99.0773	99.0837	97.8984
3885.75	99.0066	99.1727	99.1276	98.0418	99.0898	99.0202	97.1717	97.6513	98.0474	94.2397	95.8747	95.9202	95.5717	96.4951	96.4397	98.4823	97.652	97.2931	97.4748	96.2523	97.9666	99.1283	99.5942	99.2451	97.8414	97.9211	98.1724	96.473	97.7989	97.7782	91.317	98.105	97.5714	98.8874	96.7996	97.6709	97.2242	97.3125	96.9834	98.4443	97.6616	97.8748	97.3276	99.1017	97.6676	98.9435	99.0267	99.0174	97.8731
3883.89	99.0549	99.2066	99.1057	98.1424	99.0665	98.9776	97.2097	97.5928	98.1174	94.2394	95.8567	95.9207	95.568	96.5307	96.4368	98.4782	97.6334	97.3581	97.5659	96.3074	97.9671	99.1317	99.5334	99.2152	97.8546	97.9983	98.1799	96.5667	97.8143	97.7566	91.227	98.1249	97.5434	98.8888	96.7615	97.7157	97.1706	97.3245	97.0809	98.5015	97.6657	97.9314	97.3066	99.0927	97.6355	99.0019	99.1414	99.0991	97.9798
3882.02	99.01	99.2303	99.1908	98.2104	99.0744	98.9822	97.3399	97.7399	98.2305	94.3574	96.0086	96.0889	95.6145	96.6029	96.4839	98.4689	97.6299	97.5219	97.6048	96.4124	97.9567	99.2228	99.5852	99.2323	97.8517	98.058	98.2153	96.6613	97.8318	97.8107	91.4072	98.1483	97.5631	98.8478	96.8052	97.7598	97.207	97.4365	97.158	98.5373	97.7302	98.0326	97.3359	99.1283	97.7067	99.054	99.1992	99.1998	98.0501
3880.16	99.0551	99.1963	99.2731	98.0976	99.1031	98.9908	97.2985	97.7677	98.1615	94.3546	95.9595	96.0646	95.6122	96.473	96.5063	98.4283	97.6228	97.4233	97.5289	96.3755	97.9255	99.1839	99.6298	99.2705	97.7987	97.9465	98.2168	96.5619	97.8339	97.8455	91.4183	98.086	97.5486	98.8608	96.8102	97.6469	97.2263	97.3474	97.0837	98.5104	97.7639	97.9348	97.3246	99.1801	97.7338	98.9484	99.0472	99.1253	97.9756
3878.29	99.2196	99.184	99.2445	98.0481	99.0535	99.0006	97.2121	97.7106	98.1261	94.264	95.8705	95.9357	95.5183	96.3899	96.4517	98.4368	97.6155	97.3485	97.4859	96.3527	97.9647	99.1154	99.6013	99.254	97.7863	97.9177	98.1754	96.5198	97.8726	97.8351	91.2535	98.0289	97.5064	98.839	96.8327	97.6572	97.1792	97.2627	97.066	98.5394	97.7626	97.8791	97.2696	99.1464	97.7027	98.9205	99.0086	99.0842	97.9468
3876.43	99.0582	99.2136	99.2387	98.0651	99.0447	98.9999	97.1955	97.7223	98.1301	94.2682	95.8994	95.9689	95.4787	96.3922	96.4366	98.4971	97.5639	97.3526	97.4702	96.3167	97.9673	99.1367	99.6049	99.2665	97.7917	97.8618	98.1521	96.4958	97.9075	97.8492	91.3003	98.1034	97.502	98.8213	96.802	97.6983	97.1911	97.2081	97.0166	98.5413	97.7501	97.8731	97.2876	99.1548	97.7225	98.9205	99.032	99.088	97.9371
3874.57	99.0969	99.2189	99.2062	98.0595	99.1104	98.9452	97.0977	97.6625	98.0589	94.128	95.7539	95.8584	95.4892	96.373	96.4	98.522	97.5304	97.3448	97.4198	96.2422	97.9278	99.0957	99.5603	99.2451	97.7695	97.8142	98.1728	96.3477	97.7983	97.7756	91.1986	98.0101	97.4883	98.8435	96.7058	97.6317	97.1167	97.1532	96.8957	98.4571	97.7109	97.7697	97.2202	99.1811	97.6429	98.8895	99.0344	99.0707	97.9242
3872.7	99.0699	99.1794	99.1223	98.1279	99.0937	98.928	97.2847	97.7527	98.1734	94.1451	95.8899	95.9333	95.4834	96.523	96.3735	98.5042	97.5406	97.5176	97.5334	96.3795	97.8753	99.1712	99.5637	99.2492	97.7469	98.0241	98.1723	96.4837	97.7237	97.7589	91.1992	98.0207	97.5422	98.8394	96.8094	97.6988	97.1094	97.3301	97.0155	98.5448	97.6974	97.8911	97.232	99.1457	97.6352	99.0267	99.0894	99.1604	97.984
3870.84	98.8411	99.2505	99.213	98.1743	99.1411	99.0134	97.3565	97.7184	98.1328	94.2913	96.0018	96.0125	95.5767	96.5463	96.4548	98.5147	97.6098	97.5186	97.5258	96.3935	97.8753	99.2069	99.5944	99.2682	97.8465	98.0187	98.2377	96.5045	97.8112	97.7757	91.3848	98.1136	97.5399	98.8008	96.834	97.6887	97.1269	97.355	97.0751	98.4855	97.7221	97.9309	97.245	99.1023	97.6827	98.9883	99.0047	99.1459	97.9873
3868.98	99.1795	99.1469	99.1016	98.0742	99.1142	98.9655	97.2487	97.6508	98.1186	94.1761	95.8977	95.9214	95.56	96.4816	96.3839	98.5132	97.6337	97.3967	97.5095	96.3306	97.9299	99.0838	99.5236	99.1868	97.856	97.8855	98.2659	96.4344	97.8691	97.7821	91.2377	98.041	97.5317	98.7956	96.788	97.6857	97.1212	97.3015	96.9919	98.3879	97.7723	97.8961	97.2676	99.1084	97.7096	98.9597	98.9997	99.1181	97.9789
3867.11	99.0143	99.1544	99.0656	98.0704	99.0815	98.9564	97.2671	97.7378	98.1586	94.2804	95.995	95.9172	95.5538	96.5592	96.389	98.5305	97.6202	97.4532	97.5311	96.3201	97.9256	99.1823	99.546	99.2281	97.8432	97.974	98.2802	96.5593	97.8677	97.8221	91.2445	98.0439	97.5852	98.784	96.8417	97.7312	97.1324	97.3638	97.0533	98.4856	97.7443	97.9726	97.3182	99.121	97.6844	99.0303	99.0663	99.1359	98.0106
3865.25	99.044	99.2576	99.0936	98.0946	99.0511	98.9645	97.3261	97.7831	98.1774	94.4213	96.0606	95.9946	95.5721	96.5939	96.4386	98.5641	97.638	97.5291	97.5506	96.3718	97.9299	99.2219	99.5992	99.2702	97.8733	98.0406	98.2625	96.681	97.846	97.8139	91.4042	98.0254	97.6096	98.8003	96.9006	97.7672	97.1685	97.3833	97.1019	98.5806	97.7343	98.0335	97.3644	99.1044	97.6838	99.0139	99.0945	99.135	98.0305
3863.39	99.0943	99.3063	99.1631	98.1185	99.0747	98.9983	97.338	97.8028	98.2508	94.452	96.0587	96.0989	95.6363	96.5828	96.4762	98.511	97.6612	97.4995	97.5445	96.401	97.9108	99.1858	99.6611	99.2882	97.9292	97.9941	98.2813	96.6527	97.879	97.8359	91.478	98.0674	97.6192	98.8349	96.8875	97.7633	97.243	97.3668	97.088	98.5816	97.778	98.0563	97.3642	99.1737	97.6902	99.0124	99.0964	99.1188	98.0199
3861.52	99.3073	99.1848	99.1338	98.0938	99.1341	99.0243	97.2091	97.7745	98.1761	94.3278	95.897	96.0083	95.5837	96.459	96.4899	98.4766	97.5978	97.3763	97.5141	96.372	97.9317	99.1154	99.596	99.2463	97.9088	97.9093	98.2483	96.5087	97.8598	97.8555	91.3624	98.0677	97.5277	98.8739	96.8008	97.6728	97.256	97.2979	97.0261	98.4878	97.821	98.0008	97.3385	99.2349	97.7163	99.0217	98.9998	99.0673	97.9494
3859.66	99.3171	99.0848	99.1054	98.011	99.1706	99.0077	96.9974	97.6205	97.9385	94.1062	95.5963	95.7545	95.4259	96.2139	96.4561	98.4277	97.4752	97.0897	97.3274	96.2162	97.918	98.9529	99.507	99.2263	97.7143	97.7335	98.1425	96.2781	97.8578	97.8918	91.0779	98.0501	97.5046	98.8503	96.6301	97.4902	97.1607	97.0465	96.7888	98.3185	97.73	97.7763	97.2933	99.2805	97.7492	98.837	98.8755	98.9361	97.8161
3857.79	99.3097	99.0656	99.0449	97.9704	99.1055	98.8837	96.8925	97.497	97.8852	93.7951	95.443	95.5204	95.2973	96.1456	96.3032	98.3816	97.4748	96.9601	97.2733	96.1719	97.862	98.8368	99.4396	99.2261	97.6282	97.6852	98.1083	96.1962	97.7644	97.8287	90.6676	97.855	97.4576	98.8077	96.5829	97.5128	96.9856	96.8978	96.6912	98.2838	97.5776	97.6226	97.2123	99.229	97.6447	98.7673	98.8957	98.8911	97.8228
3855.93	98.613	99.1383	99.0488	98.0802	99.0426	98.8282	97.2107	97.6922	98.2084	94.0669	95.9105	95.8284	95.4406	96.5427	96.3393	98.4017	97.5889	97.3525	97.5367	96.3872	97.8452	99.2091	99.5334	99.3121	97.8282	98.0361	98.1604	96.5871	97.705	97.7398	90.9621	97.8744	97.4769	98.8145	96.8591	97.8675	97.0096	97.2782	97.0737	98.5117	97.5536	97.9428	97.236	99.0285	97.5983	99.1517	99.0782	99.0903	98.0377
3854.07	98.5599	99.2372	99.1449	98.1719	99.1016	98.9222	97.4083	97.8455	98.307	94.4329	96.1857	96.1151	95.6689	96.8016	96.5032	98.4628	97.7248	97.5956	97.6851	96.5216	97.9171	99.3442	99.5851	99.3159	97.9852	98.2441	98.2384	96.7741	97.7586	97.72	91.5184	98.0256	97.5373	98.8691	97.0311	97.9477	97.1279	97.515	97.2402	98.6122	97.697	98.1482	97.2894	99.0062	97.6933	99.2508	99.1969	99.1795	98.1432
3852.2	98.9451	99.2392	99.2054	98.1788	99.1189	98.9538	97.4061	97.8513	98.2497	94.5182	96.1807	96.1953	95.7217	96.7374	96.5805	98.4509	97.7056	97.5136	97.6873	96.5257	97.9253	99.2121	99.6388	99.2776	97.9528	98.1648	98.285	96.7242	97.8412	97.8048	91.6209	98.1598	97.6294	98.8925	96.9985	97.8441	97.2256	97.4999	97.1899	98.5766	97.8118	98.1352	97.3525	99.1219	97.7213	99.0952	99.1932	99.1583	98.0794
3850.34	99.2278	99.2186	99.1909	98.1851	99.1256	98.9735	97.3868	97.7891	98.2024	94.4742	96.1183	96.1772	95.6779	96.5629	96.5515	98.4788	97.6367	97.4202	97.5662	96.4484	97.9413	99.1463	99.6675	99.309	97.9225	98.0151	98.3499	96.6559	97.8808	97.8902	91.5373	98.1791	97.68	98.8269	96.8668	97.7394	97.2376	97.3813	97.1477	98.5382	97.846	98.0283	97.3899	99.1793	97.7097	99.0042	99.1006	99.1248	98.0235
3848.48	99.2865	99.1917	99.1847	98.1616	99.1553	98.9818	97.3198	97.7425	98.1856	94.4144	96.0482	96.093	95.6444	96.4593	96.495	98.5071	97.5747	97.4011	97.5252	96.3897	97.9433	99.1409	99.6173	99.3411	97.9086	97.9308	98.34	96.5803	97.8635	97.8684	91.3803	98.1384	97.6424	98.839	96.7818	97.6979	97.239	97.3113	97.1157	98.5001	97.8032	97.9714	97.3708	99.1855	97.69	98.968	99.0324	99.0692	98.0224
3846.61	99.2063	99.1672	99.2395	98.1338	99.1605	98.945	97.2307	97.7343	98.1592	94.3198	95.9634	96.0656	95.6077	96.488	96.4812	98.4894	97.5794	97.4053	97.5423	96.3676	97.9382	99.1032	99.6004	99.3075	97.8786	97.913	98.2236	96.5189	97.8368	97.8253	91.2613	98.1214	97.6176	98.8798	96.7734	97.703	97.2482	97.3061	97.0966	98.5049	97.8121	97.9971	97.3197	99.1734	97.681	98.9954	99.0525	99.0224	97.9923
3844.75	99.0588	99.1884	99.219	98.0726	99.1119	98.9381	97.2606	97.6571	98.1104	94.2498	95.9066	96.0407	95.5607	96.4766	96.4518	98.4374	97.613	97.3537	97.4921	96.3202	97.9579	98.9962	99.5796	99.2654	97.8398	97.8631	98.1411	96.4315	97.8495	97.8432	91.248	98.0953	97.6226	98.8076	96.7695	97.7254	97.2335	97.2039	97.0207	98.5023	97.7818	97.9124	97.3362	99.1848	97.6876	98.9554	99.02	99.0086	97.9378
3842.89	99.1529	99.1777	99.1626	98.0082	99.0867	98.9858	97.2103	97.5812	98.0975	94.1491	95.7993	95.8989	95.5062	96.439	96.3986	98.418	97.6315	97.3061	97.4917	96.3098	97.9752	98.9271	99.4674	99.2137	97.8329	97.8633	98.1386	96.3672	97.8352	97.8437	91.1653	98.041	97.5282	98.7515	96.7437	97.7007	97.1751	97.1184	96.9036	98.4687	97.7328	97.8205	97.2871	99.2106	97.6409	98.9026	98.9802	99.0335	97.941
3841.02	99.0114	99.1725	99.1842	98.0489	99.0891	99.0103	97.2486	97.6708	98.1642	94.1991	95.8221	95.8595	95.5223	96.5757	96.3866	98.4111	97.6248	97.4041	97.5281	96.3585	97.9209	99.0542	99.4703	99.2302	97.8777	97.9573	98.1893	96.4645	97.839	97.8419	91.1675	98.0809	97.5021	98.7747	96.8135	97.6984	97.1208	97.2234	96.9463	98.4913	97.6729	97.9032	97.2464	99.1149	97.6571	99.0178	99.0211	99.1239	97.9935
3839.16	98.8608	99.2421	99.2037	98.1052	99.0593	99.0178	97.3106	97.7783	98.2052	94.3334	95.9352	95.964	95.5959	96.6284	96.4177	98.4286	97.6566	97.5127	97.5378	96.3963	97.9497	99.2211	99.5349	99.2536	97.9257	98.0215	98.2424	96.5708	97.8363	97.7946	91.2467	98.119	97.6109	98.794	96.8841	97.7605	97.1232	97.2548	97.067	98.5017	97.6448	97.9905	97.2957	99.0667	97.6922	99.0834	99.0489	99.171	98.0384
3837.29	98.9226	99.2647	99.1883	98.1341	99.0341	99.0269	97.2885	97.7566	98.1519	94.3539	96.0298	96.0769	95.6228	96.5286	96.4816	98.4577	97.6832	97.5146	97.5081	96.3821	97.978	99.2506	99.5125	99.1976	97.9033	97.9808	98.2275	96.5781	97.8315	97.7665	91.2864	98.0902	97.6254	98.8399	96.873	97.7881	97.1813	97.2614	97.095	98.4561	97.7377	97.9578	97.2925	99.1222	97.7028	98.9992	99.0615	99.1144	98.0467
3835.43	99.0971	99.201	99.1528	98.1714	99.0547	99.0198	97.2914	97.7436	98.1528	94.3472	96.0682	96.1456	95.6229	96.5261	96.492	98.4948	97.6326	97.5262	97.5001	96.4155	97.9042	99.2043	99.5345	99.2017	97.8826	97.9326	98.1864	96.5818	97.8723	97.8136	91.341	98.0575	97.5444	98.8841	96.8982	97.8049	97.2184	97.3487	97.1218	98.5088	97.7648	97.9402	97.3102	99.1416	97.7325	98.9538	99.0925	99.1342	98.0167
3833.57	99.0611	99.1728	99.1568	98.1586	99.1147	98.982	97.3131	97.7693	98.1675	94.4466	96.0901	96.1839	95.6551	96.5579	96.5204	98.492	97.5857	97.5072	97.5473	96.4745	97.8666	99.2171	99.6277	99.3058	97.8929	97.9686	98.1475	96.637	97.9063	97.8713	91.4466	98.1188	97.5264	98.9095	96.9167	97.8249	97.2089	97.354	97.169	98.6121	97.7714	97.9936	97.3759	99.1552	97.8006	98.9706	99.0743	99.1725	97.9537
3831.7	99.2201	99.1897	99.1724	98.1394	99.1717	98.9643	97.2261	97.7612	98.1486	94.4507	96.0446	96.1207	95.6452	96.5272	96.516	98.5021	97.6239	97.4198	97.5356	96.4657	97.9331	99.2009	99.6072	99.2905	97.8927	98.0077	98.1599	96.5938	97.877	97.8688	91.438	98.1026	97.5744	98.8991	96.861	97.76	97.1546	97.294	97.1085	98.5403	97.815	98.02	97.3197	99.1668	97.7803	98.9605	99.0362	99.1092	97.9418
3829.84	99.3294	99.201	99.1727	98.112	99.1581	99.0183	97.2549	97.7647	98.2456	94.4477	96.0672	96.0754	95.63	96.5678	96.459	98.5086	97.6429	97.4243	97.5677	96.4764	97.972	99.2206	99.5956	99.2265	97.8583	98.0415	98.2041	96.5566	97.8832	97.9079	91.3716	98.0684	97.6731	98.8668	96.8736	97.7832	97.1965	97.3311	97.0719	98.5366	97.8573	98.0766	97.3342	99.1701	97.7195	99.0059	99.0607	99.1252	97.9941
3827.98	99.1979	99.2123	99.1962	98.0622	99.194	99.0675	97.2494	97.7432	98.19	94.392	95.9676	96.0499	95.6662	96.5317	96.4314	98.45	97.6251	97.3493	97.5255	96.4324	97.9362	99.1416	99.6287	99.2284	97.8458	97.9273	98.2584	96.4919	97.882	97.8331	91.3472	98.0833	97.7421	98.8614	96.8154	97.7129	97.2312	97.2654	97.0034	98.5369	97.8787	97.99	97.3628	99.1843	97.6807	98.9934	98.9738	99.0967	97.9518
3826.11	99.291	99.1733	99.1499	97.9812	99.1814	99.0004	97.1322	97.6452	97.9975	94.1708	95.7673	95.8366	95.5769	96.3754	96.3858	98.4488	97.5976	97.203	97.4453	96.2843	97.921	98.9124	99.5573	99.1277	97.8049	97.7813	98.2326	96.3619	97.7484	97.6988	91.1081	98.004	97.5939	98.8171	96.7059	97.6119	97.1409	97.1244	96.8819	98.3938	97.8288	97.8214	97.2565	99.2184	97.6762	98.9364	98.9025	99.0189	97.866
3824.25	99.138	99.1567	99.1227	98.0116	99.0557	98.8766	97.3133	97.7477	98.1302	94.1671	95.9377	95.8038	95.4913	96.4764	96.3843	98.4741	97.6069	97.3983	97.5534	96.3154	97.9332	98.9903	99.5242	99.1208	97.8122	97.9955	98.1492	96.5336	97.707	97.7362	91.0366	98.0127	97.4545	98.7813	96.8213	97.7396	97.1338	97.2239	96.9782	98.4843	97.7049	97.8975	97.2858	99.1297	97.7034	99.0486	99.0798	99.142	97.9253
3822.38	98.7618	99.2249	99.2555	98.0981	99.0537	98.8796	97.326	97.7339	98.2188	94.3533	96.0316	95.9201	95.6092	96.5658	96.4557	98.4187	97.6139	97.4967	97.5599	96.3702	97.8986	99.1578	99.6711	99.2272	97.8677	98.0873	98.2071	96.5523	97.8381	97.8445	91.3079	98.0793	97.5438	98.7637	96.9081	97.7399	97.1878	97.258	97.0507	98.5781	97.6184	97.973	97.4135	99.0838	97.7171	99.0063	99.1291	99.1453	97.976
3820.52	99.1322	99.1573	99.1998	98.0832	99.0612	98.9087	97.1666	97.6635	98.1375	94.2272	95.8201	95.8874	95.6029	96.4591	96.3765	98.4083	97.5553	97.3705	97.4595	96.3069	97.9362	98.993	99.5938	99.1846	97.8564	97.9452	98.2442	96.3747	97.8555	97.7907	91.1907	97.9961	97.5368	98.7964	96.8713	97.6848	97.1132	97.1198	96.9731	98.4691	97.6139	97.8923	97.3147	99.1133	97.6613	98.9331	99.0106	99.0979	97.9982
3818.66	98.9414	99.1764	99.0982	98.1552	99.0691	98.9637	97.326	97.7789	98.2429	94.3525	96.1133	96.0816	95.6269	96.6267	96.3696	98.4483	97.4972	97.5148	97.5142	96.3373	97.9461	99.0653	99.525	99.2863	97.8742	98.0356	98.2228	96.5622	97.813	97.7639	91.2225	98.0569	97.5766	98.8423	96.91	97.874	97.0998	97.2898	97.1125	98.5402	97.7015	97.9844	97.3155	99.0573	97.6786	99.0739	99.0463	99.2095	98.1001
3816.79	98.8974	99.2756	99.1204	98.2101	99.1272	98.9911	97.402	97.7637	98.27	94.5075	96.23	96.2048	95.7297	96.7084	96.472	98.5244	97.6183	97.5941	97.5398	96.4072	97.946	99.1876	99.6249	99.3062	97.9655	98.0523	98.2716	96.7097	97.8072	97.8036	91.4318	98.1134	97.5664	98.8469	96.9414	97.9073	97.1326	97.4309	97.1643	98.5586	97.7681	98.0515	97.3782	99.0579	97.7064	99.1341	99.115	99.1868	98.1348
3814.93	99.1542	99.2151	99.1858	98.1606	99.1223	98.9411	97.4346	97.8222	98.261	94.4756	96.1035	96.2014	95.7275	96.6274	96.4668	98.5113	97.6444	97.4852	97.5777	96.4673	97.9478	99.1667	99.6462	99.2969	97.9625	97.9423	98.2514	96.6955	97.8421	97.8616	91.4352	98.1379	97.5888	98.8627	96.9031	97.8183	97.1967	97.4095	97.1135	98.4797	97.787	98.0528	97.402	99.1152	97.7366	99.0147	99.1215	99.1269	98.0299
3813.07	99.1735	99.2012	99.2427	98.1329	99.1472	98.9642	97.316	97.7606	98.1997	94.3736	95.9706	96.0858	95.7079	96.4914	96.4396	98.5213	97.5627	97.3773	97.5333	96.449	97.914	99.1131	99.5907	99.3473	97.9302	97.8575	98.2704	96.5432	97.844	97.8968	91.316	98.1367	97.6116	98.8506	96.7663	97.6582	97.1805	97.3	97.0443	98.4125	97.7649	97.9593	97.3883	99.1502	97.7025	98.8465	99.0127	99.0523	97.9144
3811.2	99.3504	99.1877	99.1881	98.0849	99.1254	98.965	97.2082	97.6681	98.1503	94.357	95.896	95.9799	95.5988	96.4209	96.395	98.5437	97.5878	97.3576	97.5083	96.4125	97.9005	99.0835	99.4886	99.2554	97.8757	97.8562	98.2639	96.4122	97.7671	97.8509	91.1404	98.0335	97.5463	98.836	96.739	97.5972	97.1142	97.2272	97.0533	98.4828	97.7311	97.9127	97.3439	99.1096	97.6244	98.8649	98.9474	98.9525	97.9477
3809.34	99.1724	99.2223	99.2062	98.1167	99.1207	98.9779	97.3434	97.7713	98.1824	94.4928	96.0896	96.0875	95.604	96.6001	96.4764	98.4726	97.6592	97.4596	97.6082	96.4546	97.9699	99.1777	99.5612	99.2256	97.8512	97.9538	98.2353	96.5004	97.7505	97.8265	91.3051	98.0639	97.5756	98.8259	96.833	97.7489	97.1756	97.3384	97.1352	98.546	97.7358	98.0182	97.3993	99.09	97.5935	98.9899	99.0592	98.9884	98.0114
3807.48	99.0995	99.2299	99.2482	98.103	99.1548	98.9735	97.2451	97.6473	98.0795	94.344	95.9942	95.986	95.6714	96.5566	96.5494	98.3992	97.6495	97.347	97.52	96.3669	97.953	99.0455	99.6738	99.2237	97.8613	97.8653	98.2441	96.4281	97.7837	97.7929	91.3242	98.0703	97.5984	98.8325	96.6812	97.7366	97.1936	97.2369	96.9731	98.4325	97.7692	97.9737	97.3431	99.1594	97.6225	98.8771	99.0218	98.9888	97.953
3805.61	99.2888	99.1454	99.162	98.0385	99.0903	98.8691	97.1741	97.5579	98.0738	94.1391	95.8278	95.8204	95.5729	96.4652	96.3766	98.3618	97.6455	97.2775	97.4589	96.2776	97.8902	98.8806	99.6058	99.1425	97.8632	97.8662	98.1685	96.394	97.77	97.7899	91.0172	97.9657	97.5071	98.8388	96.6315	97.7162	97.1232	97.1508	96.8827	98.3405	97.7395	97.8929	97.2734	99.1445	97.6381	98.8694	99.0085	99.0187	97.9761
3803.75	98.8674	99.2038	99.1809	98.0822	99.0342	98.9007	97.367	97.7731	98.198	94.3658	96.0522	96.0126	95.6497	96.6516	96.3709	98.3436	97.6184	97.4718	97.5911	96.3671	97.9451	99.0774	99.6055	99.1621	97.8755	98.0462	98.1601	96.6363	97.837	97.8769	91.2131	98.0533	97.5287	98.8062	96.842	97.8896	97.1158	97.3239	97.0987	98.4606	97.6514	97.9993	97.3436	99.05	97.7041	99.077	99.0934	99.1174	98.0749
3801.88	98.9416	99.2287	99.1752	98.1061	99.089	98.9335	97.3236	97.773	98.1853	94.4338	96.046	96.0606	95.7136	96.636	96.4923	98.3659	97.5558	97.4604	97.5724	96.3614	98.011	99.1281	99.6169	99.2515	97.8787	98.0037	98.2249	96.6342	97.8627	97.8281	91.3964	98.0648	97.5691	98.804	96.8842	97.879	97.1602	97.2989	97.0568	98.5159	97.7204	98.0146	97.2942	99.1088	97.7267	99.0554	99.012	99.0698	98.0415
3800.02	99.1162	99.1491	99.1495	98.1198	99.0998	98.9307	97.3187	97.793	98.2158	94.4425	96.0608	96.0817	95.6613	96.5869	96.46	98.418	97.5266	97.4216	97.5941	96.377	97.9565	99.1717	99.6036	99.3404	97.8823	97.9955	98.2216	96.6075	97.883	97.7662	91.3095	98.0865	97.5692	98.8529	96.9374	97.8317	97.2091	97.2572	97.0437	98.5732	97.79	97.9804	97.2859	99.1555	97.7217	98.9965	99.0455	99.0803	97.9866
3798.16	99.0434	99.148	99.2028	98.1861	99.0801	99.0019	97.3655	97.8423	98.2564	94.5351	96.1659	96.2009	95.7514	96.6253	96.493	98.5058	97.6028	97.491	97.6139	96.4883	97.9229	99.2693	99.6395	99.3152	97.9221	98.0658	98.253	96.6468	97.8463	97.7957	91.3829	98.1613	97.5819	98.8289	96.9856	97.8437	97.1963	97.3364	97.1753	98.6283	97.7553	98.0176	97.3335	99.1122	97.6726	99.0622	99.1836	99.1417	98.0131
3796.29	99.1482	99.1616	99.182	98.1543	99.0466	98.9626	97.3424	97.8273	98.2619	94.5242	96.1295	96.2155	95.7553	96.6378	96.5285	98.5138	97.6663	97.5386	97.587	96.5241	97.9724	99.2308	99.6122	99.2535	97.9163	98.0442	98.264	96.6164	97.7909	97.8372	91.4114	98.1521	97.629	98.8219	96.9633	97.8061	97.1657	97.3872	97.1574	98.6127	97.8091	98.1016	97.385	99.1056	97.6746	99.062	99.1402	99.1393	98.0299
3794.43	99.1861	99.2445	99.1628	98.1445	99.0655	98.9307	97.3212	97.7759	98.2245	94.4986	96.1159	96.1727	95.6999	96.6331	96.5491	98.488	97.6788	97.5456	97.5678	96.4794	98.0025	99.185	99.582	99.2365	97.9193	98.0037	98.2523	96.6385	97.8008	97.8649	91.3602	98.1449	97.6509	98.8343	96.9435	97.75	97.2111	97.3835	97.0686	98.5666	97.8496	98.1498	97.389	99.1074	97.7406	99.0399	99.046	99.1939	97.9966
3792.57	99.2186	99.3115	99.1729	98.1611	99.1144	98.9872	97.3494	97.7692	98.2197	94.4802	96.1412	96.1899	95.6925	96.5894	96.5674	98.4772	97.6662	97.5209	97.5746	96.4631	97.9855	99.1265	99.6092	99.2102	97.9079	97.9968	98.2196	96.6332	97.8346	97.8691	91.3941	98.115	97.5895	98.8565	96.854	97.7727	97.267	97.3481	97.0599	98.5758	97.8149	98.1246	97.4011	99.1327	97.8082	99.073	99.0184	99.2332	97.9916
3790.7	99.228	99.2797	99.1797	98.1732	99.1577	98.9849	97.3273	97.8082	98.2326	94.4445	96.0973	96.1609	95.6751	96.5737	96.5275	98.4637	97.6268	97.4632	97.5759	96.4303	97.9669	99.0917	99.6112	99.224	97.9063	97.9674	98.2384	96.5721	97.8247	97.8624	91.4073	98.079	97.5628	98.8601	96.8217	97.8284	97.2219	97.3571	97.086	98.591	97.8157	98.0166	97.3941	99.1192	97.7786	98.9772	99.08	99.1696	98.0044
3788.84	99.2515	99.2349	99.1788	98.1791	99.1713	98.952	97.3277	97.7613	98.2244	94.4085	96.127	96.0743	95.6442	96.5567	96.4557	98.4801	97.6381	97.3971	97.5838	96.3675	97.993	99.0968	99.6066	99.1829	97.9233	97.941	98.2855	96.5189	97.8271	97.8578	91.3059	98.0815	97.5635	98.8949	96.8531	97.8418	97.1607	97.3608	97.1286	98.54	97.8381	97.9791	97.3354	99.1025	97.6812	98.9353	99.1007	99.0952	97.9943
3786.98	99.1576	99.2185	99.1991	98.1161	99.1915	99.0094	97.357	97.7227	98.1859	94.4452	96.152	96.0095	95.6481	96.5392	96.4498	98.4995	97.6779	97.3902	97.5652	96.3574	98.0013	99.1325	99.647	99.151	97.92	97.9765	98.2665	96.5226	97.8439	97.843	91.3203	98.1024	97.5684	98.8794	96.8554	97.8382	97.1799	97.3044	97.0596	98.5624	97.8279	97.9917	97.3446	99.1309	97.7185	98.9509	99.0225	99.0756	98.0015
3785.11	99.1025	99.2232	99.1889	98.0583	99.2145	99.02	97.2666	97.6933	98.1694	94.4497	96.0254	95.9824	95.6583	96.5075	96.4774	98.4591	97.648	97.3468	97.5053	96.3448	97.9546	99.1161	99.619	99.182	97.8886	97.9654	98.2432	96.496	97.8951	97.8105	91.3203	98.0698	97.5677	98.8369	96.8476	97.7376	97.1943	97.1956	96.9278	98.5589	97.7576	97.941	97.3956	99.1602	97.7598	98.8979	98.9876	99.0627	98.0131
3783.25	99.1718	99.2073	99.182	98.0291	99.1567	98.9751	97.2476	97.6862	98.1972	94.392	95.9524	96.0044	95.6171	96.5349	96.4626	98.4639	97.6114	97.373	97.5319	96.3693	97.9233	99.0965	99.596	99.2325	97.8618	97.9941	98.2501	96.507	97.885	97.7873	91.1784	98.0936	97.5329	98.8294	96.8545	97.7019	97.1658	97.1784	96.9938	98.4856	97.7317	97.9516	97.3547	99.1487	97.6774	98.923	99.0413	99.078	97.9945
3781.38	99.0264	99.2545	99.2527	98.0792	99.1389	98.9803	97.3265	97.7247	98.244	94.4446	96.0311	96.1582	95.6793	96.6133	96.447	98.5086	97.6257	97.4843	97.5488	96.3735	97.941	99.1649	99.6208	99.2702	97.8763	98.0733	98.2726	96.6136	97.8299	97.7325	91.22	98.1438	97.5389	98.7726	96.884	97.8079	97.1777	97.2841	97.1418	98.476	97.7516	98.0078	97.3202	99.0975	97.653	99.0033	99.0861	99.1094	97.9368
3779.52	99.0557	99.3367	99.2793	98.1682	99.182	98.9354	97.2936	97.7666	98.2409	94.4286	96.0543	96.1877	95.7617	96.6251	96.4451	98.5231	97.6562	97.4763	97.5531	96.388	98.0143	99.1397	99.6334	99.219	97.8727	98.0668	98.305	96.6232	97.8226	97.797	91.2899	98.1226	97.5937	98.8046	96.8925	97.8473	97.1889	97.322	97.121	98.5028	97.7326	97.9597	97.3432	99.068	97.6613	99.0079	99.049	99.0721	97.9347
3777.66	99.1095	99.3575	99.2186	98.122	99.164	98.94	97.3457	97.7953	98.2305	94.428	96.0905	96.102	95.7219	96.5514	96.4273	98.4868	97.6588	97.4248	97.5608	96.4146	98.0146	99.1274	99.6254	99.2128	97.8407	97.986	98.2798	96.5662	97.8223	97.8597	91.3019	98.1036	97.624	98.9315	96.9064	97.7887	97.2194	97.323	97.0777	98.5435	97.713	97.9121	97.3377	99.1212	97.6644	98.939	98.9991	99.0439	97.9959
3775.79	99.1751	99.3158	99.1847	98.0494	99.1429	99.0008	97.3189	97.7224	98.1438	94.4025	96.045	96.0113	95.6609	96.4591	96.4346	98.423	97.6568	97.3525	97.4915	96.4005	97.9927	99.0646	99.5829	99.2332	97.8276	97.8863	98.2741	96.4377	97.8121	97.8667	91.2753	98.0224	97.5619	98.984	96.8024	97.7156	97.1797	97.2285	97.0196	98.5073	97.7894	97.8945	97.2854	99.1378	97.6837	98.8323	98.9697	99.0391	98.0006
3773.93	99.1989	99.2046	99.1436	98.0478	99.0922	98.9562	97.2327	97.7391	98.1528	94.3213	96.0147	96	95.6247	96.485	96.4154	98.4134	97.6247	97.3599	97.4812	96.4264	97.9896	99.0175	99.5351	99.2383	97.8303	97.9393	98.2358	96.3971	97.775	97.8813	91.2157	98.0074	97.4938	98.9361	96.7682	97.7332	97.1412	97.1798	96.9556	98.4974	97.8373	97.9265	97.3198	99.1387	97.6735	98.8844	98.9857	99.0538	97.9586
3772.07	98.9807	99.2006	99.1839	98.1037	99.0709	98.9479	97.2138	97.7526	98.2403	94.4179	96.0829	96.0756	95.6657	96.5802	96.4262	98.4736	97.5921	97.4448	97.5526	96.406	97.967	99.1253	99.5416	99.2585	97.8808	98.0318	98.2226	96.5021	97.7792	97.8964	91.2631	98.1261	97.5085	98.8784	96.838	97.7937	97.1345	97.2424	96.9714	98.5213	97.8042	97.9896	97.3859	99.1118	97.7358	99.0162	98.9954	99.0367	97.9357
3770.2	99.0336	99.1976	99.1877	98.1257	99.0885	98.9684	97.2194	97.7309	98.2448	94.4261	96.0131	96.0205	95.6758	96.5806	96.4611	98.4712	97.6079	97.413	97.5628	96.3243	97.969	99.1475	99.5393	99.2567	97.9143	97.9826	98.2493	96.5338	97.7892	97.8195	91.2293	98.0858	97.4753	98.891	96.8272	97.8266	97.085	97.278	96.9828	98.5094	97.8018	97.9414	97.361	99.1272	97.7102	98.9799	98.9879	99.0732	97.9387
3768.34	99.0591	99.166	99.1185	98.1372	99.0293	98.9498	97.346	97.784	98.2044	94.4001	96.0248	96.0187	95.6729	96.6569	96.4699	98.4508	97.6287	97.4243	97.5621	96.3577	97.9678	99.138	99.5701	99.2428	97.9302	98.008	98.2299	96.5832	97.7944	97.7531	91.257	98.0925	97.5038	98.8779	96.8678	97.807	97.1678	97.3423	97.0216	98.5512	97.7577	97.9826	97.3501	99.125	97.6485	98.9688	99.0367	99.1665	98.0323
3766.47	99.003	99.2239	99.1764	98.1277	99.0056	98.9293	97.3966	97.7281	98.1171	94.4569	96.0308	96.1294	95.71	96.6632	96.4859	98.471	97.608	97.4231	97.5634	96.4326	97.9405	99.1342	99.6393	99.2255	97.9226	97.9951	98.2739	96.5367	97.8467	97.7799	91.3623	98.0908	97.5731	98.8417	96.872	97.7282	97.2278	97.3206	97.0628	98.5863	97.7435	98.0282	97.3614	99.1505	97.6811	98.9244	99.0959	99.1326	98.0682
3764.61	99.2119	99.1984	99.1625	98.0248	99.1092	98.9229	97.2506	97.6654	98.1423	94.3715	95.8956	96.0792	95.6909	96.4869	96.4324	98.4305	97.5955	97.312	97.5132	96.4587	97.9009	99.0195	99.5843	99.1748	97.8244	97.8799	98.2519	96.4483	97.8452	97.7945	91.2184	98.0299	97.5032	98.796	96.7928	97.7026	97.2186	97.1954	97.0107	98.5572	97.8229	97.9925	97.3919	99.1663	97.7357	98.8136	99.0476	99.0341	97.9635
3762.75	99.0588	99.2168	99.1674	98.0223	99.1385	98.9365	97.2484	97.7407	98.1961	94.3974	95.9914	96.0472	95.6445	96.4122	96.4392	98.3776	97.64	97.2872	97.4777	96.384	97.8777	98.9718	99.5088	99.1516	97.8079	97.8851	98.1793	96.5286	97.8387	97.7694	91.1204	98.0385	97.5273	98.7849	96.8054	97.7575	97.1756	97.193	97.008	98.5292	97.8223	97.9638	97.3667	99.0819	97.7334	98.8633	99.0439	99.0406	97.9139
3760.88	99.0411	99.2478	99.1712	98.095	99.0745	98.9296	97.36	97.8164	98.2509	94.4609	96.0914	96.0474	95.6337	96.5492	96.4581	98.4428	97.6524	97.4007	97.5341	96.3863	97.893	99.0239	99.5058	99.1677	97.8658	97.9383	98.2033	96.6022	97.8693	97.7545	91.2193	97.9866	97.5912	98.8287	96.838	97.7794	97.1719	97.2732	97.0932	98.533	97.863	97.9916	97.2877	99.0989	97.7006	98.9567	99.0475	99.0782	97.989
3759.02	99.0819	99.191	99.1631	98.073	99.1244	98.9808	97.3413	97.7643	98.2253	94.4376	96.0044	96.0595	95.6932	96.5571	96.4575	98.4725	97.6007	97.4072	97.5418	96.437	97.8696	99.0673	99.554	99.1761	97.8376	97.8902	98.2636	96.5183	97.8703	97.8163	91.3254	98.0071	97.5827	98.9286	96.7788	97.7359	97.2199	97.2931	97.0421	98.5188	97.8633	97.9228	97.3373	99.18	97.7255	98.895	98.927	99.0547	98.0121
3757.16	99.3911	99.0975	99.0541	97.976	99.173	98.9403	97.1619	97.6613	98.091	94.2386	95.7698	95.9675	95.653	96.3453	96.4073	98.4103	97.5683	97.1769	97.4443	96.4073	97.9054	98.9444	99.5458	99.1198	97.8056	97.791	98.2713	96.322	97.818	97.8388	91.161	97.9977	97.5382	98.9109	96.6875	97.6907	97.1702	97.1996	96.9002	98.4377	97.8068	97.7066	97.3186	99.1623	97.6812	98.7476	98.8351	98.9761	97.9471
3755.29	99.1399	99.0762	99.0614	97.9552	99.1309	98.8481	97.0891	97.5887	98.0722	94.1844	95.7234	95.8417	95.5503	96.2554	96.3746	98.3486	97.5126	97.0552	97.424	96.3507	97.9114	98.876	99.563	99.1166	97.7928	97.8068	98.1852	96.2447	97.8512	97.8978	90.9432	97.9867	97.5197	98.8486	96.7478	97.7256	97.127	97.1031	96.8503	98.4211	97.7553	97.6963	97.2872	99.1311	97.6297	98.7373	98.8503	98.966	97.965
3753.43	98.9542	99.1141	99.0721	98.062	99.053	98.9054	97.182	97.5823	98.1811	94.2843	95.8845	95.8571	95.5727	96.4958	96.3824	98.4218	97.571	97.3327	97.5078	96.4145	97.9314	98.9432	99.5598	99.211	97.8384	97.9632	98.1333	96.4355	97.8054	97.8758	90.9831	97.9368	97.4581	98.7521	96.8711	97.822	97.1055	97.1103	96.9526	98.534	97.6734	97.8746	97.324	99.0915	97.6286	98.9891	98.9365	99.0324	98.0416
3751.57	98.7552	99.1331	99.0808	98.1247	99.0287	98.9959	97.3032	97.7032	98.2477	94.4288	96.1397	96.0663	95.6243	96.6861	96.4997	98.4039	97.5549	97.4639	97.5513	96.4347	97.902	99.0524	99.6147	99.3717	97.8082	97.9956	98.1711	96.6175	97.8102	97.8588	91.3049	98.079	97.5463	98.7763	96.9161	97.8318	97.2056	97.2419	97.0631	98.5601	97.6753	97.933	97.3705	99.1118	97.7041	99.0505	99.0307	99.0595	98.0178
3749.7	99.0734	99.066	99.0402	98.0308	99.0742	98.9522	97.0856	97.6052	97.9957	94.1984	95.907	95.9065	95.5687	96.4254	96.4937	98.3805	97.5489	97.1958	97.4183	96.2953	97.8504	98.8458	99.5476	99.3193	97.8067	97.808	98.2144	96.3793	97.8106	97.7164	91.2219	97.9738	97.492	98.8059	96.752	97.5948	97.2056	97.1587	96.8501	98.3567	97.7184	97.7841	97.228	99.1911	97.6936	98.7829	98.8755	98.9563	97.9931
3747.84	98.9772	98.9864	98.9643	97.9265	98.9923	98.8369	97.1706	97.7092	98.0886	94.1264	95.933	95.9538	95.4715	96.4567	96.3542	98.4014	97.6061	97.2757	97.5343	96.3186	97.8151	98.9343	99.505	99.1293	97.856	97.9429	98.0898	96.4912	97.7546	97.6809	91.0385	97.9363	97.4524	98.8285	96.8342	97.6989	97.1873	97.2133	97.0061	98.4225	97.6108	97.8908	97.2493	99.1795	97.7267	98.8825	98.9503	99.067	98.0698
3745.97	98.5596	99.2418	99.1516	98.0954	99.0393	98.988	97.3794	97.8649	98.2741	94.5354	96.3021	96.2632	95.6997	96.7825	96.5799	98.4849	97.7773	97.6908	97.6498	96.4286	97.9297	99.2863	99.6148	99.1329	97.9984	98.2241	98.1939	96.7856	97.7299	97.7379	91.4929	98.1252	97.5938	98.8619	97.0299	97.9098	97.2188	97.4396	97.2625	98.6202	97.636	98.0927	97.3629	99.0538	97.7021	99.1476	99.1483	99.2518	98.0709
3744.11	98.9558	99.2395	99.1232	98.1264	99.0526	99.0038	97.3908	97.8708	98.2685	94.6024	96.2237	96.2883	95.7305	96.7105	96.6144	98.4831	97.7662	97.654	97.6915	96.4815	98.0148	99.1412	99.5579	99.1883	97.9512	98.1153	98.2979	96.6582	97.8076	97.7713	91.6232	98.165	97.7003	98.9118	96.9899	97.8666	97.2605	97.3927	97.2392	98.7051	97.8123	98.1649	97.3883	99.1388	97.7565	99.084	99.1543	99.1873	98.0215
3742.25	99.0391	99.1924	99.1776	98.1252	99.1022	98.99	97.3456	97.7812	98.1738	94.5061	96.0473	96.1599	95.7378	96.5353	96.5966	98.4454	97.6608	97.3915	97.5896	96.4371	98.0024	99.0079	99.5761	99.2206	97.8799	97.9561	98.3426	96.4984	97.8951	97.8459	91.4727	98.1623	97.7167	98.8432	96.8468	97.794	97.2624	97.232	97.1494	98.6976	97.8732	98.0666	97.3706	99.2339	97.7983	98.9205	99.0536	99.0608	97.9897
3740.38	99.2118	99.0795	99.1259	98.0184	99.109	98.9233	97.2481	97.6923	98.1512	94.291	95.9883	95.9666	95.7125	96.3973	96.552	98.4041	97.6533	97.2481	97.5245	96.4222	97.9469	98.9418	99.5376	99.2021	97.8887	97.9011	98.3099	96.4661	97.9047	97.8382	91.178	97.9806	97.6364	98.8006	96.7673	97.7178	97.2511	97.216	97.0236	98.6035	97.9241	97.9182	97.3643	99.2476	97.7084	98.8574	98.9759	99.0238	97.9947
3738.52	98.8153	99.1517	99.0794	97.9653	99.0747	98.8967	97.2439	97.6749	98.1657	94.4098	96.099	96.0476	95.726	96.5186	96.5398	98.3904	97.6433	97.3516	97.5936	96.4239	97.8982	99.0851	99.5976	99.2683	97.9353	98.0247	98.2695	96.5868	97.7784	97.7353	91.1631	97.9916	97.6605	98.8126	96.8274	97.8186	97.2058	97.3734	96.994	98.5397	97.9194	97.9735	97.4826	99.094	97.6684	98.9128	99.0955	99.106	98.1098
3736.66	98.8044	99.1853	99.0535	98.0512	99.1462	98.9144	97.2754	97.7062	98.1951	94.4424	96.0957	96.1502	95.7518	96.6986	96.5462	98.4607	97.6494	97.4773	97.6939	96.4424	97.9581	99.1435	99.6167	99.2563	97.9349	98.1365	98.2438	96.632	97.7189	97.7347	91.3749	98.0931	97.57	98.803	96.9215	97.907	97.2309	97.4168	97.0456	98.5587	97.8815	98.0244	97.4587	98.9857	97.6521	99.0011	99.1482	99.1201	98.174
3734.79	98.8684	99.2506	99.0863	98.1356	99.1607	98.9991	97.4168	97.8183	98.3302	94.5392	96.238	96.2451	95.7572	96.8512	96.5112	98.4536	97.7042	97.5842	97.8118	96.5078	97.9188	99.2661	99.577	99.2253	97.95	98.1783	98.2229	96.7538	97.792	97.8618	91.5952	98.1912	97.5421	98.8462	97.0684	98.0019	97.3102	97.4226	97.1863	98.6393	97.8725	98.1289	97.4147	99.0321	97.7435	99.096	99.1094	99.1247	98.1729
3732.93	99.0075	99.3269	99.2098	98.1841	99.1235	99.0654	97.4423	97.8157	98.3108	94.6398	96.2319	96.2984	95.7492	96.8117	96.6019	98.4704	97.7358	97.5469	97.6888	96.5341	97.9246	99.2516	99.6045	99.2593	98.019	98.1513	98.2907	96.743	97.9024	97.8765	91.6688	98.1998	97.6323	98.8854	97.0434	97.9239	97.3065	97.4351	97.274	98.6383	97.8832	98.1673	97.4058	99.1315	97.7873	99.0243	99.0547	99.1132	98.1386
3731.07	99.1729	99.2163	99.3031	98.1135	99.0754	98.9846	97.331	97.746	98.2525	94.6083	96.0798	96.2447	95.741	96.6188	96.6294	98.5292	97.716	97.4636	97.5028	96.4573	97.97	99.1036	99.5859	99.2781	98.0357	98.0669	98.2866	96.634	97.9206	97.8461	91.495	98.1155	97.6934	98.9346	96.8754	97.7968	97.2617	97.4443	97.168	98.5356	97.9243	98.0263	97.3712	99.1861	97.8146	98.9718	99.0072	99.1034	98.0621
3729.2	99.0532	99.1686	99.3401	98.0491	99.019	98.9606	97.3194	97.7614	98.3124	94.6157	96.0856	96.2464	95.756	96.6017	96.5485	98.5547	97.7138	97.5083	97.5206	96.4405	97.9833	99.1017	99.5604	99.2589	97.9885	97.9939	98.2328	96.625	97.8568	97.8759	91.3211	98.1112	97.6846	98.9952	96.8905	97.7871	97.2472	97.4845	97.0913	98.5083	97.9127	98.0226	97.3874	99.1477	97.8414	98.9978	99.0417	99.1724	98.0834
3727.34	99.0673	99.2078	99.2821	98.0602	99.077	99.0114	97.3158	97.8881	98.3059	94.5797	96.0882	96.2677	95.7377	96.6514	96.5467	98.5033	97.698	97.5553	97.5733	96.4975	97.9817	99.1351	99.5639	99.2773	97.9433	97.971	98.2856	96.6536	97.8609	97.9044	91.2864	98.1081	97.6021	98.9807	96.9925	97.8018	97.2001	97.3697	97.1574	98.5345	97.8659	98.0858	97.4315	99.1414	97.8245	98.9612	99.1341	99.1871	98.1352
3725.47	99.097	99.2131	99.2131	98.1325	99.0616	99.0107	97.3533	97.9499	98.2773	94.5771	96.1289	96.2635	95.7271	96.6485	96.5363	98.4709	97.6637	97.5746	97.5867	96.5511	97.9577	99.1728	99.5477	99.2634	97.9947	98.0573	98.3589	96.6945	97.9274	97.8959	91.365	98.1088	97.6033	98.9008	96.9887	97.8671	97.2122	97.3059	97.2383	98.574	97.8585	98.1404	97.4561	99.1737	97.7955	98.9642	99.1319	99.1903	98.1171
3723.61	99.0421	99.2422	99.2322	98.1862	98.9963	99.0298	97.3783	97.8668	98.2887	94.566	96.2028	96.2795	95.7758	96.6911	96.5416	98.5024	97.6903	97.5501	97.6289	96.5541	97.9965	99.2556	99.6134	99.1988	98.0578	98.1192	98.3645	96.6993	97.8757	97.8545	91.4679	98.1269	97.6451	98.8415	96.9913	97.8841	97.2099	97.3329	97.199	98.619	97.8858	98.1653	97.4648	99.2041	97.7903	98.9942	99.0692	99.1566	98.1023
3721.75	99.1581	99.2597	99.2687	98.1628	99.0379	98.9916	97.4026	97.8057	98.3639	94.5349	96.2309	96.3027	95.7737	96.7004	96.5381	98.4933	97.721	97.5017	97.6724	96.5148	98.0454	99.2378	99.609	99.1996	98.0262	98.0902	98.2769	96.6808	97.8357	97.8019	91.4677	98.1171	97.6748	98.8434	96.9515	97.8667	97.1962	97.3776	97.158	98.652	97.9144	98.1139	97.4321	99.2023	97.8017	99.0028	99.1108	99.1283	98.1153
3719.88	99.1573	99.248	99.3208	98.1718	99.0922	98.9703	97.4225	97.8467	98.3416	94.5732	96.176	96.2872	95.6806	96.6265	96.6059	98.4376	97.6903	97.4552	97.6472	96.4851	98.0126	99.1638	99.6105	99.2668	97.9643	98.0447	98.2554	96.6112	97.8883	97.8311	91.4566	98.1208	97.6895	98.82	96.9098	97.8418	97.2728	97.4123	97.1455	98.6726	97.8693	98.0843	97.4185	99.1615	97.8282	98.9809	99.1063	99.1258	98.0893
3718.02	99.2554	99.2061	99.3152	98.0809	99.0722	98.9372	97.315	97.8283	98.1873	94.467	95.937	96.097	95.6308	96.4527	96.5947	98.413	97.6422	97.3366	97.5195	96.3941	97.9637	99.0375	99.5819	99.2434	97.8844	97.9212	98.2594	96.4901	97.9426	97.8614	91.3955	98.012	97.6967	98.8569	96.8504	97.7128	97.287	97.2652	97.0631	98.5865	97.8247	98.0015	97.3526	99.1935	97.8501	98.906	99.0066	99.0648	98.0476
3716.16	99.1984	99.1585	99.2774	97.9764	99.0216	98.8816	97.2583	97.7488	98.1294	94.2694	95.8206	95.9131	95.6105	96.3811	96.5294	98.4224	97.6213	97.2547	97.4415	96.2741	97.9405	98.9366	99.4537	99.1716	97.8356	97.8718	98.2018	96.3898	97.9383	97.7863	91.213	98.0257	97.6112	98.9525	96.7878	97.6776	97.2679	97.1142	97.0521	98.4511	97.8701	97.9025	97.2696	99.1952	97.8666	98.898	98.9909	98.9772	98.0337
3714.29	98.9343	99.1273	99.2037	98.0032	99.0162	98.8973	97.3444	97.7614	98.2373	94.2803	95.9872	95.886	95.6328	96.5254	96.4888	98.403	97.5999	97.3622	97.4998	96.3403	97.9666	99.0784	99.3685	99.2076	97.8796	97.9699	98.2026	96.4787	97.8543	97.7777	91.1796	98.0787	97.5469	98.91	96.8592	97.7887	97.2333	97.1534	97.1748	98.4912	97.8808	97.9434	97.2618	99.117	97.7982	98.9147	99.0699	99.0735	98.0175
3712.43	98.8986	99.2071	99.2031	98.0616	99.0356	98.9155	97.4324	97.8533	98.3033	94.3494	96.0759	96.0998	95.6683	96.6767	96.4177	98.3889	97.5813	97.4791	97.5292	96.3965	97.9949	99.1868	99.4146	99.2718	97.95	98.0915	98.2414	96.5918	97.7952	97.8599	91.38	98.0323	97.594	98.7725	96.9744	97.8542	97.1649	97.3043	97.2049	98.6236	97.7651	98.0457	97.3298	99.0927	97.7335	98.9572	99.0764	99.1954	98.0303
3710.56	99.0149	99.255	99.2547	98.0771	99.0246	98.929	97.4633	97.8879	98.2702	94.3904	96.0434	96.2294	95.6362	96.6405	96.4251	98.4182	97.6352	97.4153	97.5205	96.377	97.9969	99.1475	99.4615	99.2797	97.9476	98.1335	98.2692	96.6232	97.7676	97.8326	91.4756	98.0371	97.608	98.8004	96.8891	97.857	97.1629	97.4065	97.0861	98.6821	97.7152	98.047	97.4522	99.1281	97.788	99.0221	99.0436	99.1599	98.0538
3708.7	99.0615	99.2848	99.2354	98.105	99.0411	98.9576	97.4046	97.8137	98.2396	94.368	95.9538	96.1421	95.5762	96.4696	96.4552	98.402	97.6449	97.2958	97.4675	96.3377	97.9945	99.1669	99.5479	99.2474	97.8955	98.0456	98.2867	96.5756	97.7961	97.8038	91.4105	98.084	97.6104	98.8461	96.8298	97.7979	97.1584	97.3887	97.0019	98.5914	97.7303	98.0293	97.5144	99.1788	97.8096	99.0036	98.9753	99.081	98.0573
3706.84	99.1485	99.2578	99.1837	98.0924	99.0465	98.9457	97.3077	97.7502	98.1766	94.312	95.7923	95.9711	95.5099	96.3604	96.3638	98.3396	97.5381	97.1759	97.3787	96.3109	97.9532	99.1007	99.5986	99.2065	97.879	97.9117	98.2751	96.3955	97.7981	97.7434	91.2684	98.0149	97.5284	98.7953	96.777	97.6917	97.1216	97.285	96.9468	98.4625	97.721	98.0176	97.4178	99.1521	97.7258	98.9318	98.9007	99.0146	98.0508
3704.97	99.0994	99.2173	99.1453	98.0429	98.9913	98.9733	97.3364	97.7438	98.1471	94.2907	95.7827	95.9168	95.4601	96.3859	96.2731	98.327	97.4168	97.1688	97.3778	96.2748	97.9009	99.074	99.4908	99.1736	97.8993	97.9068	98.23	96.3269	97.697	97.7255	91.2389	97.954	97.4658	98.7403	96.714	97.7062	97.0729	97.3082	96.9908	98.5006	97.6791	98.0176	97.3625	99.0974	97.6924	98.9388	98.97	99.0145	98.0795
3703.11	98.9984	99.2573	99.189	98.0797	98.9749	98.9924	97.4061	97.7585	98.1578	94.2573	95.8443	95.9242	95.3977	96.3819	96.2697	98.3696	97.3779	97.2263	97.456	96.1753	97.912	99.1674	99.4025	99.1589	97.891	97.954	98.2019	96.3631	97.6569	97.8007	91.2764	97.9668	97.4293	98.7673	96.7012	97.6608	97.0689	97.3643	97.0215	98.588	97.6205	98.0174	97.3539	99.0822	97.7334	98.9749	99.0743	99.0708	98.1144
3701.25	99.1411	99.2413	99.1916	98.0949	98.9326	98.9195	97.3638	97.8001	98.227	94.2153	95.7375	95.8899	95.3467	96.3308	96.2576	98.3393	97.4147	97.1832	97.4336	96.119	97.9279	99.1865	99.3946	99.1408	97.8759	97.9698	98.1977	96.3207	97.7521	97.854	91.2079	97.9453	97.3696	98.7798	96.691	97.5303	97.0907	97.2665	96.9485	98.506	97.6381	98.0213	97.3169	99.1167	97.7067	98.9372	99.0424	99.0773	98.1009
3699.38	99.1853	99.2098	99.2406	98.023	98.8982	98.9056	97.3554	97.841	98.2203	94.1701	95.628	95.8563	95.358	96.2756	96.1244	98.2704	97.4338	97.1095	97.3712	96.0787	97.8584	99.1322	99.3839	99.0932	97.8244	97.9837	98.2023	96.2614	97.8096	97.8289	91.1228	97.9429	97.3978	98.7316	96.686	97.5161	97.1334	97.19	96.9533	98.4754	97.6799	98.0188	97.3412	99.1359	97.7477	98.8774	98.9227	99.0246	98.0575
3697.52	99.2517	99.2219	99.2803	97.9731	98.8936	98.9381	97.3336	97.8035	98.0997	94.0272	95.4872	95.7018	95.3012	96.1775	96.1149	98.2786	97.3879	97.0167	97.339	96.0121	97.7883	99.041	99.3658	99.0215	97.778	97.8891	98.197	96.1325	97.763	97.7852	91.092	97.9081	97.3962	98.6915	96.59	97.554	97.0952	97.1387	96.9428	98.4905	97.635	97.9622	97.311	99.1738	97.6617	98.8283	98.8499	98.9536	97.9772
3695.66	99.2287	99.1377	99.2145	97.9161	98.8775	98.8734	97.2064	97.698	98.0101	93.8983	95.3893	95.4973	95.1696	96.0409	96.1781	98.2228	97.3146	96.8606	97.2808	95.975	97.7404	98.9495	99.3058	99.0024	97.7341	97.7402	98.1624	95.9872	97.7396	97.7875	90.9708	97.811	97.3297	98.6878	96.4607	97.49	96.9946	97.0363	96.782	98.3451	97.5568	97.8076	97.272	99.2175	97.5454	98.8022	98.87	98.8774	97.9452
3693.79	99.1095	99.1358	99.1308	97.9014	98.8565	98.7883	97.0724	97.6064	97.8941	93.8286	95.3773	95.4161	95.1253	95.966	96.1967	98.1147	97.2893	96.7935	97.1996	95.9043	97.7067	98.938	99.2604	99.1212	97.6821	97.6759	98.141	95.9314	97.6797	97.6662	90.8124	97.8006	97.2718	98.7186	96.4722	97.3918	96.8679	96.9415	96.7035	98.1692	97.48	97.7055	97.2255	99.2065	97.5625	98.7454	98.9546	98.8954	97.9838
3691.93	98.9528	99.2124	99.0999	97.9014	98.8085	98.7921	97.1944	97.6816	97.9704	93.8677	95.5027	95.5869	95.2075	96.1651	96.1068	98.1192	97.2827	96.9482	97.2757	95.9554	97.7343	99.0066	99.3052	99.1685	97.6395	97.7919	98.1529	96.1	97.646	97.5439	90.8344	97.9094	97.2714	98.7007	96.6208	97.5417	96.7965	97.0123	96.7962	98.2535	97.3929	97.7883	97.2321	99.1568	97.6727	98.8042	99.057	99.1001	98.0072
3690.06	98.6693	99.2904	99.2061	97.9782	98.858	98.8204	97.4059	97.8193	98.1705	94.0816	95.7218	95.7794	95.4205	96.4517	96.0926	98.1735	97.2858	97.1093	97.3216	96.0426	97.8227	99.2263	99.4012	99.1911	97.7777	98.028	98.2331	96.335	97.6783	97.6252	91.1837	98.0115	97.4113	98.6228	96.7279	97.7452	96.8557	97.193	96.9275	98.4542	97.4313	97.933	97.3171	99.0611	97.7536	98.9025	99.0673	99.2095	98.0141
3688.2	98.9105	99.2189	99.2441	97.9699	98.8817	98.8331	97.4385	97.866	98.2421	94.1314	95.7057	95.7671	95.4601	96.4216	96.2326	98.2019	97.2786	97.0778	97.3279	96.104	97.9037	99.2092	99.4113	99.1886	97.8649	98.0726	98.2198	96.2873	97.7314	97.695	91.3143	97.9888	97.4861	98.6845	96.7383	97.7356	96.9103	97.2367	97.004	98.5474	97.5641	98.0024	97.3271	99.082	97.742	98.9005	99.0574	99.1266	98.0513
3686.34	99.0614	99.2065	99.2776	98.0188	98.8904	98.9158	97.3903	97.8352	98.1728	94.1702	95.6784	95.7717	95.4272	96.3416	96.3078	98.2498	97.2484	97.0345	97.3846	96.1196	97.8659	99.156	99.4657	99.2364	97.8111	98.0061	98.1744	96.2784	97.7982	97.8003	91.3204	98.034	97.5162	98.8134	96.7371	97.6272	96.9506	97.2144	97.0212	98.5131	97.6189	97.9784	97.3595	99.0983	97.7348	98.8944	99.0636	99.0822	98.091
3684.47	99.3153	99.2572	99.2714	98.0707	98.8977	98.9002	97.3635	97.796	98.1099	94.0956	95.584	95.792	95.3881	96.35	96.2916	98.2562	97.237	97.0364	97.4185	96.0888	97.8299	99.1056	99.463	99.234	97.7821	97.924	98.1589	96.2561	97.7629	97.7992	91.3282	98.0166	97.5252	98.8059	96.6929	97.5459	96.9811	97.1583	96.9355	98.4447	97.6578	97.9085	97.3427	99.1944	97.7571	98.9033	98.9948	99.1411	98.0247
3682.61	99.2897	99.2669	99.3039	97.9801	98.9264	98.8843	97.3667	97.7581	98.0694	94.0344	95.5315	95.7165	95.415	96.2664	96.2005	98.1919	97.2389	96.9731	97.3415	96.0487	97.8257	99.0987	99.4257	99.2161	97.7681	97.7667	98.1232	96.1642	97.7477	97.7913	91.3402	98.0101	97.5339	98.715	96.6537	97.5307	97.0218	97.1258	96.8042	98.3927	97.6184	97.794	97.3375	99.2962	97.7832	98.8245	98.9141	99.1204	97.9103
3680.75	99.4158	99.1823	99.2344	97.8316	99.03	98.8992	97.1558	97.5767	97.9596	93.7803	95.3021	95.4538	95.3333	95.9884	96.1363	98.1869	97.3042	96.7479	97.2114	95.9787	97.866	98.901	99.3667	99.1256	97.7095	97.5432	98.0655	95.952	97.7101	97.7973	91.077	97.7732	97.3793	98.7014	96.4916	97.4394	96.9994	96.9651	96.6296	98.2451	97.5954	97.6466	97.2827	99.2298	97.6499	98.6866	98.8289	98.923	97.8628
3678.88	99.0211	99.0437	99.084	97.8613	99.0123	98.8265	97.2112	97.7097	98.0642	93.6542	95.3474	95.4718	95.2203	96.0229	96.1335	98.1764	97.3077	96.84	97.2612	95.9738	97.8294	98.8706	99.3035	99.0966	97.6516	97.7016	97.9635	96.1008	97.7252	97.7103	90.8539	97.6723	97.3666	98.7182	96.5425	97.6375	96.9616	96.9871	96.6839	98.2603	97.5668	97.8013	97.2796	99.1004	97.6437	98.8392	98.9137	98.9961	97.9801
3677.02	98.6608	99.1644	99.162	98.0987	98.999	98.9005	97.3384	97.7857	98.1144	93.9242	95.6372	95.6577	95.4133	96.2359	96.2933	98.2027	97.2894	97.0741	97.2665	95.9743	97.8139	99.0749	99.3036	99.2287	97.8006	97.8894	98.1227	96.3073	97.8033	97.676	91.2395	97.8848	97.4991	98.756	96.7377	97.7813	96.9982	97.0927	96.8003	98.3766	97.4738	97.9737	97.3306	99.1198	97.7269	98.9191	99.0006	99.1017	98.0279
3675.15	99.1195	99.1339	99.1457	98.031	98.9582	98.8956	97.2133	97.6924	98.0353	93.7843	95.5072	95.6226	95.3607	96.1275	96.2895	98.2404	97.2144	96.9651	97.2183	96.0128	97.8139	98.9638	99.2811	99.1856	97.7644	97.6701	98.2158	96.1333	97.7403	97.6832	91.2747	97.8874	97.4762	98.8643	96.6734	97.5932	96.9974	96.9292	96.7432	98.2813	97.5038	97.7956	97.3056	99.1991	97.702	98.767	98.9188	98.9651	97.9275
3673.29	98.9912	99.1686	99.2039	97.9389	98.9296	98.895	97.34	97.7351	98.0724	93.8213	95.5386	95.6456	95.297	96.2706	96.2044	98.2399	97.2106	97.0548	97.2874	96.0804	97.7779	98.9911	99.3162	99.1552	97.6776	97.7435	98.1452	96.2449	97.6677	97.7062	91.1834	98.0206	97.447	98.8352	96.762	97.6044	96.95	96.9388	96.8197	98.3806	97.3953	97.7605	97.2933	99.094	97.6361	98.8798	99.0086	98.9916	97.9973
3671.43	98.8094	99.2387	99.2782	98.0107	98.9562	98.9176	97.4682	97.883	98.1124	94.0287	95.6404	95.7334	95.408	96.4417	96.2465	98.2311	97.3533	97.2356	97.3824	96.1098	97.8487	99.1772	99.4524	99.2469	97.8	98.0308	98.1418	96.4195	97.717	97.6933	91.4485	98.0763	97.4848	98.769	96.9778	97.7129	96.9447	97.1895	97.037	98.5504	97.3893	97.9381	97.3083	99.0489	97.6319	99.032	99.1561	99.1554	98.0968
3669.56	98.8898	99.2253	99.2337	98.0797	98.925	98.8638	97.4385	97.9158	98.0736	94.0555	95.611	95.838	95.4055	96.4153	96.3092	98.2099	97.3067	97.2087	97.3497	96.1107	97.8666	99.1869	99.5202	99.2445	97.8662	98.0717	98.2388	96.3254	97.853	97.7148	91.5145	98.0286	97.5334	98.7619	96.9609	97.763	96.9869	97.2824	97.052	98.5135	97.5498	98.0238	97.3803	99.0696	97.7046	99.0239	99.1398	99.1898	98.0891
3667.7	99.1324	99.2751	99.2282	98.1004	98.8871	98.8171	97.4435	97.8764	98.0682	94.0246	95.5527	95.8466	95.4126	96.3504	96.3421	98.1682	97.2456	97.1189	97.3576	96.1199	97.833	99.1299	99.4607	99.1448	97.829	98.003	98.2798	96.3222	97.8954	97.7589	91.3521	98.0288	97.5759	98.7693	96.8807	97.7601	97.0155	97.2222	96.9927	98.4351	97.6342	97.9669	97.4505	99.0803	97.7537	98.9817	99.0352	99.1517	98.0335
3665.84	99.3189	99.2734	99.2708	98.1007	98.9135	98.8823	97.4103	97.8494	98.1007	93.9484	95.4708	95.8057	95.4607	96.269	96.3275	98.1574	97.2135	97.0251	97.3334	96.1048	97.8238	99.1101	99.3713	99.0998	97.7691	97.92	98.1525	96.2887	97.8071	97.8346	91.3407	98.0192	97.5392	98.7854	96.8316	97.7188	97.0262	97.2	96.9524	98.4734	97.6185	97.9261	97.4168	99.0897	97.7815	98.9455	98.9381	99.1206	97.9995
3663.97	99.264	99.2553	99.2718	98.05	98.9367	98.9388	97.2847	97.764	98.0767	93.8715	95.412	95.6459	95.4505	96.1958	96.3146	98.1503	97.1233	96.9493	97.237	96.1051	97.8273	99.1291	99.3229	99.1693	97.7608	97.841	98.0568	96.2178	97.7133	97.8298	91.4032	98.0395	97.5407	98.8622	96.8167	97.6034	97.0112	97.1903	96.8893	98.5066	97.557	97.937	97.3456	99.1413	97.7416	98.9348	98.9249	99.1153	97.9905
3662.11	99.2265	99.2974	99.2992	97.9803	98.9635	98.9254	97.1678	97.6388	97.956	93.7506	95.3184	95.4164	95.3881	96.0876	96.3353	98.059	97.0605	96.8206	97.1862	96.0401	97.8162	99.0919	99.3379	99.1915	97.7221	97.7216	98.0872	96.197	97.7072	97.7723	91.2979	98.0529	97.5531	98.8656	96.7417	97.4843	97.0035	97.1076	96.7659	98.4187	97.5235	97.8648	97.2904	99.2088	97.6646	98.8254	98.9342	99.0721	97.9211
3660.25	99.2613	99.1845	99.3007	97.9394	98.9496	98.8607	97.1922	97.6549	97.9515	93.6386	95.2207	95.3173	95.3111	96.0825	96.2604	97.9846	97.0626	96.7547	97.208	95.9695	97.7866	99.005	99.3234	99.1913	97.6363	97.697	98.1054	96.1458	97.7179	97.7219	91.0646	98.0258	97.4946	98.7936	96.6537	97.5735	96.9508	97.0502	96.7354	98.3858	97.3933	97.8207	97.2683	99.1493	97.6529	98.7694	98.9557	99.0651	97.9386
3658.38	99.0221	99.1842	99.3096	97.9815	98.9386	98.8744	97.2909	97.822	97.9926	93.7532	95.2582	95.4458	95.311	96.2018	96.166	97.9896	97.0556	96.8215	97.2055	95.9609	97.7459	99.0943	99.3932	99.2419	97.69	97.8258	98.0891	96.2322	97.8056	97.6666	91.0752	98.0096	97.4391	98.7482	96.6981	97.7193	96.8646	97.0597	96.7853	98.389	97.2691	97.8686	97.2711	99.0531	97.6302	98.9496	99.009	99.099	97.987
3656.52	99.2167	99.2618	99.2948	97.9083	98.9577	98.881	97.1701	97.7432	97.8374	93.5938	95.0041	95.3946	95.2909	96.0322	96.1697	97.9749	96.9773	96.6681	97.0476	95.8413	97.7275	98.9827	99.3374	99.1595	97.7088	97.7159	98.0856	96.0645	97.7782	97.6911	91.0554	97.9396	97.3868	98.7876	96.7	97.5817	96.8366	96.8726	96.6983	98.2163	97.2944	97.7516	97.1629	99.1286	97.5845	98.927	98.9621	98.9939	97.899
3654.65	99.298	99.1826	99.1786	97.7081	98.8863	98.7934	97.0004	97.5171	97.7012	93.3734	94.6751	95.112	95.1783	95.796	96.0536	97.9084	96.864	96.4265	96.8328	95.6462	97.7082	98.8054	99.2018	99.1086	97.5281	97.5146	98.0236	95.8593	97.7331	97.779	90.8648	97.8726	97.3855	98.7824	96.6226	97.386	96.7285	96.6581	96.5864	98.0645	97.26	97.5715	97.109	99.2203	97.5387	98.7023	98.8988	98.9226	97.8471
3652.79	99.0292	99.1499	99.1614	97.6439	98.7764	98.7489	96.9986	97.4425	97.6825	93.4011	94.6712	94.9368	95.1286	95.8473	95.9395	97.8837	96.8256	96.5207	96.8013	95.6175	97.7801	98.7597	99.161	99.0874	97.5159	97.5882	97.9583	95.8447	97.6703	97.6656	90.7978	97.7656	97.4307	98.6061	96.551	97.3919	96.5726	96.6551	96.591	98.1217	97.0726	97.5379	97.0823	99.1681	97.4152	98.6639	98.8824	99.0414	97.886
3650.93	98.7369	99.1846	99.2334	97.8053	98.7133	98.803	97.1826	97.5419	97.8442	93.4782	94.9873	95.1022	95.1616	96.0469	96.076	97.8926	96.8102	96.7387	97.0225	95.7476	97.7569	98.9318	99.1886	98.9949	97.5804	97.8321	97.8718	95.9981	97.5685	97.5443	90.9619	97.7128	97.4171	98.5658	96.5927	97.6683	96.6934	96.849	96.7274	98.2673	97.088	97.6659	97.0487	99.0474	97.4443	98.863	98.9741	99.1979	97.9478
3649.06	98.736	99.242	99.2393	98.0334	98.7735	98.8919	97.3427	97.6038	97.9677	93.6279	95.1132	95.2629	95.2775	96.1974	96.1551	97.9594	96.7918	96.8525	97.1596	95.8019	97.6597	99.081	99.297	99.0421	97.5491	97.8755	97.941	96.1606	97.5771	97.5691	91.231	97.8648	97.3913	98.6465	96.7689	97.7813	96.8056	97.0068	96.8089	98.254	97.1711	97.7517	97.1376	99.0258	97.5619	98.9879	99.025	99.1995	97.9947
3647.2	99.0394	99.2507	99.225	98.0886	98.8446	98.8187	97.3543	97.5881	97.9468	93.7383	94.9799	95.3039	95.2819	96.1095	96.1318	97.9311	96.8222	96.8063	97.1064	95.7856	97.6468	99.0528	99.2586	99.0884	97.4869	97.7024	97.9974	96.113	97.647	97.5901	91.3287	97.9698	97.4245	98.7144	96.8119	97.6755	96.8066	97.0275	96.7204	98.1503	97.1346	97.7209	97.2121	99.0031	97.6103	99.0012	98.9865	99.1235	97.9575
3645.34	99.171	99.2944	99.2661	97.9935	98.8457	98.8374	97.3246	97.5295	97.8351	93.7661	94.9892	95.3024	95.2727	95.9836	96.077	97.8793	96.8735	96.7269	97.0062	95.7635	97.6424	99.0924	99.2145	99.0991	97.437	97.6435	97.8965	96.0004	97.6806	97.6428	91.2761	97.959	97.4354	98.7838	96.723	97.5999	96.8106	97.0266	96.6925	98.1499	97.0965	97.712	97.2553	98.9801	97.5997	98.9316	99.0252	99.0941	97.8989
3643.47	99.1781	99.2859	99.316	97.9701	98.8347	98.9017	97.2677	97.5201	97.7787	93.7479	95.0007	95.1919	95.3096	95.8916	96.0338	97.9122	96.8226	96.6921	96.965	95.794	97.626	99.0771	99.2599	99.1265	97.3828	97.6869	97.8617	95.9066	97.696	97.6709	91.17	97.8928	97.4279	98.7926	96.6702	97.5565	96.8738	97.0134	96.7233	98.1866	97.1398	97.7426	97.1739	99.0294	97.5758	98.8006	99.0585	99.0582	97.9274
3641.61	99.1956	99.2016	99.2976	98.0279	98.8684	98.8406	97.2189	97.5933	97.7885	93.6981	94.8873	95.0827	95.3087	95.8877	96.068	97.8669	96.7133	96.6435	96.9568	95.7699	97.6451	99.0261	99.3031	99.1421	97.3121	97.6682	97.8758	95.8562	97.6868	97.6787	91.1149	97.8627	97.3932	98.7917	96.6811	97.6115	96.8738	97.0239	96.6957	98.202	97.1845	97.7559	97.0638	99.1073	97.5033	98.717	99.0097	99.057	97.9663
3639.75	99.206	99.2302	99.2818	98.0125	98.8848	98.8414	97.216	97.5635	97.7299	93.6509	94.7653	95.0266	95.2502	95.9025	96.0644	97.8084	96.7095	96.5811	96.8975	95.6552	97.663	98.9983	99.273	99.0987	97.3532	97.6368	97.8938	95.85	97.6751	97.6929	91.127	97.8749	97.3382	98.7455	96.6371	97.6356	96.7362	96.9349	96.6338	98.1799	97.1265	97.7134	97.1007	99.113	97.4313	98.7587	98.905	99.0388	97.9147
3637.88	99.1772	99.2578	99.3086	97.9248	98.7836	98.8333	97.1633	97.431	97.6426	93.5984	94.6973	94.9866	95.1532	95.8475	96.0339	97.7679	96.6817	96.5207	96.8434	95.5671	97.6031	98.9638	99.2139	99.0479	97.3871	97.6186	97.8862	95.787	97.6305	97.6606	91.034	97.8855	97.3339	98.6961	96.5673	97.5774	96.6428	96.8217	96.6258	98.1692	97.022	97.6379	97.1185	99.0702	97.4214	98.8602	98.8756	99.0094	97.8744
3636.02	99.0464	99.2772	99.3269	97.8799	98.7484	98.7697	97.0088	97.3351	97.5529	93.5371	94.5752	94.8456	95.1495	95.7676	96.0429	97.6503	96.511	96.4039	96.7827	95.5065	97.548	98.9369	99.2531	99.0917	97.3652	97.4917	97.8727	95.7674	97.5697	97.6509	91.0128	97.8346	97.4034	98.6669	96.5423	97.4841	96.6461	96.6942	96.5697	98.1693	97.0067	97.5692	97.0662	99.0385	97.4167	98.8676	98.9186	98.949	97.8392
3634.15	99.274	99.0946	99.1761	97.7837	98.7466	98.6672	96.8118	97.1869	97.4656	93.2606	94.2179	94.5955	95.0488	95.5629	95.9285	97.5452	96.3794	96.1312	96.6792	95.3864	97.5155	98.7352	99.1773	99.0507	97.2774	97.2416	97.7669	95.5302	97.5017	97.5144	90.8262	97.6771	97.3119	98.6865	96.397	97.3365	96.5011	96.4717	96.4003	98.0202	96.9505	97.4237	96.9427	99.0353	97.3291	98.7256	98.8299	98.8116	97.7159
3632.29	98.9405	99.0136	99.151	97.7617	98.7093	98.6705	96.9196	97.1931	97.4802	93.2725	94.2542	94.5786	94.9065	95.5381	95.7528	97.4706	96.4333	96.1521	96.6654	95.3385	97.3942	98.8519	99.1075	99.0297	97.1304	97.3042	97.6179	95.5673	97.4459	97.4492	90.6622	97.6923	97.2008	98.6745	96.43	97.3467	96.4032	96.6068	96.4808	97.9925	96.7666	97.4455	96.9676	98.9493	97.3164	98.8392	98.8468	98.836	97.7644
3630.43	98.6834	99.2524	99.2227	97.9591	98.6935	98.8011	97.138	97.3066	97.489	93.4827	94.5589	94.833	95.0478	95.7374	95.8414	97.5772	96.6353	96.4456	96.8042	95.4419	97.4509	99.1513	99.2047	99.0895	97.1731	97.5598	97.6956	95.891	97.4878	97.4768	90.9297	97.79	97.3038	98.5893	96.6567	97.5472	96.4777	96.9392	96.6845	98.0223	96.7029	97.6418	96.9525	98.8598	97.2947	99.0232	99.0474	99.0461	97.913
3628.56	98.9428	99.2114	99.1698	97.9668	98.6503	98.7996	97.1979	97.3966	97.5054	93.4906	94.5688	94.9123	95.1399	95.7081	95.8976	97.6467	96.6558	96.4156	96.797	95.5349	97.5659	99.0474	99.1664	99.0886	97.2202	97.5523	97.6982	95.8871	97.5089	97.4993	91.0824	97.8422	97.3186	98.597	96.6566	97.586	96.5544	96.9534	96.6833	97.9814	96.7882	97.5863	96.891	98.98	97.3175	98.9276	99.0859	99.0983	97.8436
3626.7	99.0545	99.1458	99.2581	97.8686	98.693	98.7769	97.0942	97.3535	97.4727	93.4192	94.4472	94.7796	95.0651	95.6185	95.8619	97.6279	96.5084	96.3188	96.6244	95.4821	97.5526	98.9134	99.0821	99.05	97.176	97.4561	97.6411	95.7442	97.5226	97.5324	91.0144	97.9051	97.3078	98.5808	96.5839	97.4518	96.612	96.8563	96.5179	98.0143	96.8083	97.4953	96.9145	99.066	97.4252	98.7864	98.9869	99.0811	97.786
3624.84	99.0994	99.158	99.2583	97.8458	98.7082	98.7142	96.9799	97.2395	97.3873	93.2959	94.2613	94.6247	94.8871	95.4642	95.7832	97.5335	96.3492	96.171	96.5307	95.3584	97.4729	98.84	99.0405	98.9264	97.063	97.3486	97.6406	95.5727	97.5684	97.5083	90.871	97.8221	97.2382	98.6247	96.4896	97.3445	96.5768	96.7385	96.3913	97.9973	96.7761	97.4807	96.8722	99.1338	97.4577	98.7087	98.9076	99.0137	97.7979
3622.97	99.019	99.1802	99.1871	97.8417	98.6423	98.6346	96.9476	97.2195	97.2887	93.2803	94.1675	94.5587	94.8525	95.4093	95.7401	97.4557	96.2563	96.0703	96.5164	95.2714	97.391	98.8548	99.0147	98.9461	96.957	97.3758	97.6218	95.5315	97.5575	97.4446	90.7275	97.6524	97.1313	98.6762	96.4576	97.3981	96.4499	96.6851	96.4658	97.9903	96.7358	97.5142	96.7797	99.1463	97.3622	98.6884	98.8683	98.8891	97.8389
3621.11	98.8806	99.157	99.2168	97.8605	98.6369	98.6502	96.9131	97.2634	97.2956	93.3695	94.2645	94.5736	94.9662	95.522	95.8024	97.5139	96.2494	96.2106	96.5301	95.2563	97.3683	98.8475	98.9968	99.0481	96.973	97.4789	97.5812	95.5982	97.4818	97.4287	90.87	97.6311	97.204	98.641	96.4986	97.4768	96.4901	96.8586	96.581	98.1141	96.7613	97.5926	96.789	99.0454	97.2889	98.7337	98.8329	98.9311	97.8248
3619.24	98.8999	99.1145	99.3246	97.899	98.7002	98.7483	96.9162	97.2258	97.3371	93.3759	94.2563	94.5608	95.0141	95.5758	95.8968	97.5284	96.3944	96.2218	96.5636	95.2472	97.3876	98.7954	98.9949	98.9747	97.0241	97.3345	97.5481	95.5385	97.5238	97.4291	91.0002	97.6861	97.3031	98.6536	96.5139	97.4887	96.5443	96.8342	96.5224	98.1076	96.7891	97.5083	96.8557	99.0334	97.311	98.7627	98.8186	99.0042	97.7408
3617.38	99.0257	99.0643	99.3417	97.8298	98.6817	98.8089	96.9536	97.2115	97.3299	93.2942	94.1204	94.4632	94.9695	95.5211	95.7944	97.457	96.5116	96.1842	96.5803	95.2679	97.361	98.7862	98.9634	98.8855	96.9136	97.1573	97.5206	95.545	97.5736	97.5019	90.8516	97.7303	97.3192	98.6944	96.4484	97.5327	96.4707	96.6639	96.4518	97.9713	96.7682	97.3578	96.9117	99.0254	97.3021	98.726	98.8615	98.9978	97.7467
3615.52	98.9878	99.1606	99.3571	97.7783	98.6788	98.7909	96.9301	97.1768	97.2397	93.2535	94.1256	94.5012	94.9117	95.504	95.7507	97.4362	96.4553	96.2993	96.5564	95.285	97.3471	98.8201	99.0509	98.9087	96.8429	97.2146	97.5309	95.5885	97.4825	97.5554	90.8611	97.7211	97.3309	98.644	96.4219	97.5725	96.4556	96.6349	96.4762	97.8658	96.7606	97.2617	96.9077	98.9843	97.2404	98.7034	98.8908	99.021	97.7537
3613.65	98.9973	99.1432	99.2946	97.7821	98.6949	98.724	96.8944	97.1125	97.1673	93.1847	94.1279	94.602	94.8792	95.4976	95.7466	97.4672	96.3467	96.3037	96.5344	95.2919	97.4514	98.8346	99.1142	98.9295	96.8751	97.2363	97.493	95.5323	97.3522	97.485	90.8962	97.6918	97.3012	98.6206	96.4498	97.4844	96.5017	96.683	96.4795	97.8536	96.791	97.2341	96.8654	98.9623	97.1835	98.7438	98.8712	98.9645	97.7013
3611.79	98.9081	99.1453	99.2274	97.8135	98.7121	98.7527	96.8872	97.0181	97.1825	93.1779	94.2271	94.5899	94.9104	95.5454	95.7082	97.474	96.3029	96.2991	96.52	95.2929	97.4811	98.8788	99.1299	98.966	96.8475	97.2552	97.476	95.6252	97.4421	97.4569	90.8475	97.7707	97.2343	98.6607	96.4689	97.4578	96.4533	96.7394	96.4807	97.9161	96.7703	97.3525	96.8247	98.8948	97.1538	98.8708	98.8724	98.9477	97.6821
3609.93	98.9069	99.2329	99.1927	97.8701	98.7893	98.7766	96.8666	96.994	97.2374	93.2899	94.3376	94.6173	94.9772	95.6593	95.7504	97.5399	96.3206	96.3608	96.5677	95.3143	97.3987	98.9357	99.0493	99.024	96.8729	97.3122	97.4789	95.6848	97.5421	97.4648	90.9313	97.7437	97.2941	98.6373	96.576	97.5329	96.4229	96.788	96.5123	97.9922	96.7465	97.5261	96.8072	98.8733	97.2038	98.917	98.9755	99.06	97.6409
3608.06	99.0755	99.217	99.2501	97.9318	98.8115	98.7814	96.8947	97.0214	97.1548	93.3689	94.3333	94.6485	95.0083	95.6609	95.7587	97.5884	96.3583	96.2777	96.6436	95.2657	97.4066	98.9728	99.0427	99.0547	96.8854	97.2813	97.4773	95.577	97.5284	97.4742	90.9592	97.7433	97.3763	98.6612	96.6572	97.5246	96.4876	96.7688	96.5397	97.9681	96.7717	97.5315	96.7531	98.8738	97.2759	98.789	98.9292	99.0935	97.6357
3606.2	99.1564	99.206	99.3098	97.9358	98.7381	98.7338	96.8641	97.0079	96.9579	93.3536	94.2657	94.6324	94.9906	95.5393	95.6776	97.5907	96.3994	96.1642	96.622	95.1634	97.4196	98.9265	99.0448	99.0053	96.7582	97.2135	97.468	95.5271	97.525	97.4834	90.8999	97.8069	97.3225	98.6948	96.5541	97.4808	96.5575	96.7233	96.4944	97.8511	96.7925	97.4124	96.7394	98.9243	97.2084	98.7477	98.8002	99.0761	97.7134
3604.34	99.079	99.1902	99.2714	97.9201	98.688	98.6812	96.7998	97.0071	96.9038	93.32	94.1566	94.599	94.9411	95.446	95.6131	97.5834	96.3783	96.1202	96.5385	95.1712	97.3663	98.8178	99.0484	98.9646	96.6771	97.163	97.4349	95.5476	97.485	97.5238	90.8425	97.7608	97.2575	98.6451	96.4893	97.4342	96.5759	96.7331	96.4505	97.7751	96.7533	97.3576	96.7759	98.9494	97.1196	98.7515	98.8629	99.0531	97.7464
3602.47	99.0067	99.1851	99.219	97.9222	98.6796	98.7073	96.8526	97.0067	96.9429	93.2657	94.1327	94.4788	94.9106	95.4317	95.6351	97.5493	96.3303	96.109	96.484	95.1913	97.4029	98.8095	99.0088	98.9507	96.6868	97.159	97.393	95.5663	97.4877	97.5644	90.8264	97.7192	97.1877	98.613	96.4662	97.45	96.5282	96.7511	96.4841	97.782	96.752	97.3485	96.7832	98.9267	97.0977	98.6799	98.987	99.0274	97.6952
3600.61	99.005	99.1947	99.1898	97.8748	98.6563	98.8024	96.8351	96.9803	96.9633	93.2192	94.1296	94.4007	94.8954	95.4661	95.648	97.579	96.3132	96.0721	96.4393	95.123	97.4843	98.8847	98.994	98.9667	96.6586	97.1279	97.3229	95.4532	97.4714	97.5201	90.7986	97.7294	97.2086	98.5841	96.3707	97.4001	96.5322	96.6668	96.469	97.8404	96.7371	97.3665	96.7129	98.9462	97.0733	98.6706	98.9404	98.9807	97.6808
3598.74	99.0135	99.1753	99.1784	97.8232	98.6041	98.8242	96.746	96.9607	96.9604	93.2635	94.0637	94.3615	94.8032	95.4782	95.6357	97.576	96.3557	96.062	96.3801	95.0812	97.4328	98.9119	99.0007	99.0459	96.6625	96.9691	97.2712	95.3948	97.5005	97.4606	90.705	97.7985	97.2335	98.6126	96.3553	97.4071	96.6206	96.7003	96.3963	97.8792	96.7289	97.3471	96.6303	98.9578	97.0214	98.7506	98.9004	98.8994	97.6886
3596.88	99.0038	99.2348	99.2651	97.8619	98.6147	98.8209	96.7621	96.9116	96.9695	93.3362	94.0928	94.3832	94.7832	95.4286	95.5914	97.4996	96.4478	96.1688	96.3935	95.0821	97.3049	98.8898	98.9991	99.0856	96.6423	96.8624	97.3018	95.5092	97.5468	97.4887	90.7584	97.8459	97.236	98.5981	96.3542	97.4882	96.5597	96.7984	96.4587	97.9213	96.7862	97.3397	96.6442	98.9661	96.9795	98.8321	98.9829	98.9428	97.6628
3595.02	99.0139	99.2463	99.3106	97.8625	98.6715	98.7458	96.7841	96.8244	96.924	93.2801	94.0947	94.4452	94.7705	95.338	95.5687	97.4702	96.4311	96.1307	96.3954	95.0448	97.2623	98.8302	99.0365	99.0219	96.5108	96.9222	97.3153	95.5049	97.5345	97.5684	90.9192	97.7348	97.2276	98.5772	96.3104	97.4425	96.4442	96.7752	96.4694	97.9002	96.7886	97.3214	96.6823	98.9221	97.0159	98.7603	98.9625	99.0329	97.6552
3593.15	98.9829	99.1121	99.2872	97.8325	98.7067	98.589	96.6556	96.6909	96.8328	93.1142	93.8716	94.2871	94.7057	95.2286	95.5078	97.3868	96.3002	95.9365	96.3227	94.9685	97.2789	98.6864	98.9837	98.9295	96.3643	96.8847	97.2139	95.4055	97.4572	97.5634	90.8086	97.6639	97.1518	98.6917	96.308	97.3347	96.3952	96.6327	96.4116	97.8147	96.6783	97.2018	96.5882	98.9179	96.9841	98.6039	98.8502	98.9835	97.6415
3591.29	98.8213	99.1143	99.2563	97.7824	98.6248	98.5359	96.5609	96.6237	96.7905	93.0499	93.704	94.1615	94.6855	95.258	95.4815	97.3246	96.2084	95.943	96.2786	94.9285	97.2613	98.6588	98.9689	98.8732	96.2776	96.8338	97.1062	95.3987	97.4627	97.5266	90.6442	97.636	97.1646	98.6893	96.3715	97.4115	96.3815	96.5435	96.4736	97.8288	96.6128	97.195	96.4352	98.8883	96.905	98.6523	98.809	98.9233	97.5866
3589.43	98.8281	99.2141	99.2323	97.7801	98.5971	98.7266	96.6442	96.6691	96.7528	93.1684	93.7898	94.2231	94.7898	95.3853	95.5137	97.4034	96.2308	96.0989	96.3139	94.9584	97.2825	98.7475	99.0272	98.8898	96.3308	96.9623	97.1345	95.4605	97.5093	97.4862	90.7131	97.6022	97.2667	98.5436	96.48	97.5223	96.4573	96.7337	96.5505	97.8946	96.6835	97.3437	96.4308	98.8415	96.9287	98.8395	98.8847	99.0191	97.5234
3587.56	98.9313	99.1232	99.2046	97.7447	98.6386	98.83	96.6624	96.7158	96.7242	93.1595	93.8756	94.3135	94.8291	95.3646	95.5257	97.4322	96.2622	96.1313	96.2961	94.9921	97.3412	98.8	98.9565	98.8575	96.439	96.9786	97.1581	95.46	97.5128	97.4891	90.8712	97.6574	97.301	98.5314	96.559	97.4923	96.5287	96.8082	96.5366	97.9366	96.7758	97.4048	96.4967	98.8377	96.9774	98.879	98.9162	99.0733	97.5324
3585.7	98.9493	99.1349	99.1644	97.8308	98.5794	98.7976	96.6388	96.7024	96.6403	93.0767	93.8282	94.3009	94.7458	95.3044	95.5129	97.4342	96.3088	96.1328	96.1987	94.9678	97.3549	98.8037	98.9075	98.8058	96.4547	96.9235	97.1344	95.4046	97.5565	97.4561	90.8648	97.7093	97.2611	98.562	96.4737	97.4824	96.4985	96.7229	96.4604	97.986	96.6789	97.3507	96.5207	98.8186	96.924	98.7936	98.9104	98.9719	97.5938
3583.84	98.9968	99.1568	99.1321	97.8972	98.5559	98.7365	96.6453	96.6416	96.5592	93.1349	93.7996	94.2655	94.677	95.2893	95.4754	97.407	96.2617	96.0576	96.1983	94.9439	97.29	98.7823	98.8769	98.7926	96.3358	96.9236	97.0676	95.3514	97.5579	97.428	90.7936	97.6919	97.2041	98.5754	96.3719	97.4834	96.4722	96.7326	96.4234	98.0084	96.6273	97.3085	96.5215	98.7909	96.8752	98.7737	98.8822	98.8963	97.5991
3581.97	99.0156	99.0509	99.2177	97.8191	98.6164	98.7325	96.6353	96.6116	96.5593	93.1707	93.7933	94.2127	94.6634	95.2704	95.4716	97.3648	96.1547	95.9251	96.2113	94.8849	97.2663	98.6979	98.8772	98.8701	96.2347	96.8375	97.0283	95.3318	97.4934	97.4633	90.7546	97.6628	97.2041	98.5669	96.3524	97.4821	96.4939	96.758	96.4227	97.9851	96.6793	97.3155	96.4178	98.8546	96.7637	98.7642	98.8014	98.8725	97.5413
3580.11	99.0197	99.0889	99.2677	97.8171	98.665	98.6181	96.6327	96.5857	96.5624	93.1093	93.6484	94.133	94.6607	95.1934	95.4132	97.3596	96.1234	95.7993	96.1639	94.82	97.2882	98.6727	98.9153	98.8684	96.2334	96.735	96.9851	95.3225	97.5297	97.4754	90.6678	97.6705	97.1692	98.6048	96.3505	97.4548	96.498	96.7285	96.4003	97.9347	96.6841	97.2789	96.3789	98.9168	96.6456	98.745	98.7922	98.8693	97.5148
3578.24	99.0103	99.225	99.2442	97.8535	98.6685	98.5615	96.5952	96.4867	96.4937	93.1264	93.584	93.9984	94.5915	95.1437	95.341	97.3155	96.1093	95.7604	96.0973	94.8474	97.2449	98.7499	98.9308	98.8342	96.1966	96.7401	96.9333	95.3123	97.5064	97.4363	90.6483	97.6392	97.0785	98.647	96.3398	97.4536	96.4992	96.6977	96.4095	97.9089	96.6427	97.2998	96.466	98.9011	96.6797	98.7924	98.8436	98.9411	97.4841
3576.38	99.0342	99.2439	99.2208	97.8672	98.6186	98.6677	96.5415	96.4278	96.441	93.1637	93.658	93.9834	94.5697	95.1718	95.2903	97.2472	96.0616	95.8002	96.0636	94.8658	97.1999	98.7718	98.8834	98.838	96.0982	96.7135	96.9557	95.2014	97.376	97.4408	90.6173	97.631	97.0852	98.5436	96.3314	97.4471	96.5203	96.654	96.4095	97.8456	96.608	97.3272	96.4524	98.8886	96.8	98.7901	98.8407	98.9837	97.4153
3574.52	99.0422	99.196	99.1852	97.8081	98.5699	98.6891	96.4565	96.375	96.4328	93.07	93.5948	94.0249	94.5399	95.0694	95.2234	97.1425	95.9762	95.7435	96.017	94.7148	97.1648	98.6638	98.8115	98.8255	96.0147	96.5976	96.9929	95.0772	97.386	97.4726	90.6005	97.5948	97.1404	98.4316	96.3042	97.3835	96.4629	96.609	96.385	97.6988	96.6004	97.2224	96.3165	98.8692	96.7968	98.7596	98.7712	98.8913	97.3999
3572.65	98.9519	99.0431	99.1524	97.6966	98.5429	98.6259	96.2979	96.2828	96.2472	92.8807	93.3811	93.8462	94.4397	94.905	95.1667	97.0544	95.8834	95.6695	95.8901	94.5409	97.1412	98.5865	98.6907	98.7943	95.9508	96.526	96.8088	94.9737	97.4506	97.4591	90.51	97.5388	97.1249	98.4899	96.2377	97.259	96.3197	96.5257	96.2421	97.6408	96.5333	97.0404	96.1981	98.8015	96.7013	98.6827	98.7163	98.7819	97.3747
3570.79	98.7845	98.9643	99.1817	97.777	98.473	98.6575	96.2615	96.2456	96.1091	92.773	93.2517	93.6642	94.341	94.9217	95.1768	97.0763	95.8111	95.7008	95.865	94.5674	97.0945	98.5791	98.6418	98.7455	95.9644	96.5324	96.6472	95.0356	97.348	97.4791	90.4013	97.5361	97.0493	98.5333	96.21	97.2492	96.3016	96.4575	96.1347	97.6248	96.4623	96.9166	96.1584	98.7887	96.6039	98.5991	98.8032	98.7941	97.378
3568.93	98.7001	99.0276	99.2065	97.8589	98.4571	98.7255	96.3214	96.2408	96.1538	92.8511	93.2968	93.706	94.3952	95.0368	95.1269	97.1355	95.823	95.7455	95.9852	94.6425	97.0851	98.6775	98.7896	98.7372	95.9743	96.6153	96.6825	95.1469	97.2261	97.3823	90.5071	97.4931	97.0251	98.5319	96.2802	97.3568	96.3029	96.5576	96.2934	97.6777	96.4495	96.9762	96.1658	98.7843	96.5384	98.6741	98.8491	98.8656	97.4786
3567.06	98.6992	99.0756	99.1556	97.8371	98.5175	98.6714	96.342	96.2286	96.1855	92.9467	93.4034	93.7621	94.4454	95.0697	95.1042	97.1117	95.8773	95.7339	96.0403	94.6032	97.0817	98.7041	98.8668	98.7876	95.8884	96.6033	96.719	95.1797	97.3086	97.2727	90.5503	97.4634	97.0797	98.5364	96.3187	97.3181	96.2871	96.6532	96.3882	97.7903	96.4869	97.0067	96.2273	98.7296	96.5988	98.7165	98.8416	98.909	97.5197
3565.2	98.761	99.0877	99.1224	97.8281	98.5128	98.601	96.3294	96.1872	96.1582	92.9019	93.3537	93.7072	94.4135	94.9921	95.1188	97.0464	95.8624	95.706	95.9981	94.5688	96.9979	98.6187	98.7494	98.7989	95.794	96.4919	96.6093	95.2009	97.3944	97.2872	90.5737	97.4828	97.0415	98.505	96.3007	97.2602	96.3147	96.641	96.2954	97.8433	96.4983	97.0341	96.2425	98.7123	96.6627	98.6392	98.8586	98.9505	97.4389
3563.33	98.8796	99.057	99.1611	97.8112	98.4587	98.6295	96.325	96.148	96.0883	92.8111	93.3001	93.6556	94.3395	94.8671	95.1073	97.0834	95.8331	95.6346	95.9271	94.5214	96.9907	98.613	98.6653	98.7652	95.7708	96.4277	96.5635	95.1379	97.3793	97.3292	90.633	97.5706	97.0042	98.4823	96.2359	97.3257	96.3667	96.6551	96.2623	97.8044	96.4664	97.1799	96.1921	98.6679	96.5619	98.6064	98.8082	98.9865	97.2842
3561.47	98.9322	99.1168	99.157	97.8226	98.4621	98.668	96.342	96.1767	95.9995	92.8173	93.3396	93.6781	94.3327	94.8649	95.0143	97.1086	95.7853	95.5576	95.8339	94.4837	97.0191	98.6529	98.7509	98.7343	95.7835	96.4472	96.6757	94.9993	97.3801	97.3618	90.6135	97.5838	97.073	98.4793	96.2584	97.3345	96.3434	96.6341	96.4103	97.7739	96.4502	97.2348	96.1422	98.6509	96.4106	98.6314	98.7761	98.9265	97.2857
3559.61	98.9849	99.1487	99.1976	97.8307	98.5447	98.6326	96.3565	96.1308	95.9493	92.8656	93.3861	93.6709	94.3287	94.8613	94.9316	97.1029	95.7348	95.5211	95.7275	94.4742	97.0175	98.673	98.771	98.6831	95.7273	96.4558	96.6883	94.9485	97.4062	97.4152	90.5167	97.4895	97.1562	98.4141	96.2526	97.2976	96.3161	96.578	96.4419	97.8272	96.5113	97.1182	96.1297	98.7365	96.409	98.6373	98.8312	98.8565	97.3507
3557.74	98.983	99.0883	99.2434	97.7689	98.5924	98.5601	96.2926	95.9984	95.9491	92.8933	93.2522	93.6142	94.2469	94.7645	94.8631	97.124	95.7145	95.5647	95.6816	94.4312	97.0169	98.6893	98.7258	98.7146	95.6447	96.4031	96.5507	94.976	97.4135	97.4127	90.3906	97.433	97.0723	98.3785	96.1726	97.2991	96.2979	96.5707	96.294	97.7904	96.5467	97.0376	96.0727	98.7618	96.4896	98.6303	98.841	98.8187	97.2858
3555.88	98.8607	99.1149	99.1947	97.7227	98.5115	98.5613	96.1705	95.9563	95.9212	92.8856	93.0316	93.5985	94.1827	94.6954	94.9113	97.105	95.7575	95.5782	95.7803	94.4079	96.969	98.6993	98.7313	98.7799	95.608	96.3867	96.496	95.0032	97.4485	97.3643	90.3374	97.4725	97.0334	98.417	96.1304	97.2447	96.2445	96.6184	96.2224	97.761	96.4015	97.0081	96.0636	98.7427	96.5471	98.6193	98.7565	98.7874	97.2819
3554.02	98.8191	99.1737	99.1616	97.7866	98.4074	98.6032	96.1623	95.9805	95.8674	92.8821	92.9629	93.5601	94.1475	94.7224	94.978	97.0721	95.7933	95.5369	95.8013	94.3422	96.947	98.7147	98.7434	98.8024	95.6079	96.3223	96.5199	95.0107	97.4231	97.3495	90.4327	97.4746	96.9966	98.4545	96.0872	97.2211	96.2491	96.5516	96.2538	97.7877	96.309	96.9983	96.0861	98.7038	96.5616	98.6414	98.7543	98.8291	97.3745
3552.15	98.9237	99.0897	99.0949	97.8313	98.3718	98.5942	96.1311	95.9987	95.8117	92.7742	93.0048	93.4972	94.129	94.696	94.8948	97.0326	95.6909	95.4838	95.6562	94.2894	97.0441	98.6399	98.7298	98.7481	95.5518	96.2438	96.4973	94.9825	97.3616	97.3404	90.4357	97.3723	96.9583	98.5327	96.0674	97.2511	96.3001	96.4811	96.2686	97.7226	96.2906	97.0327	95.9895	98.7078	96.4623	98.6455	98.7832	98.8613	97.3813
3550.29	98.9109	99.0329	99.0374	97.9011	98.4019	98.5539	96.0305	95.9685	95.7609	92.6462	93.0237	93.4908	94.1072	94.6512	94.8014	96.9302	95.6143	95.5178	95.6196	94.3176	97.1118	98.5741	98.7388	98.7005	95.421	96.2553	96.4438	94.8962	97.3104	97.3052	90.3017	97.35	96.9728	98.5297	96.1578	97.2851	96.2749	96.514	96.2664	97.6326	96.2752	97.027	95.895	98.7194	96.2969	98.5658	98.7102	98.8234	97.3052
3548.43	98.8605	99.0564	99.1047	97.8985	98.4733	98.6126	96.0055	95.8838	95.7491	92.6224	92.9988	93.4816	94.1134	94.634	94.7592	96.9467	95.5989	95.582	95.6533	94.2701	97.0566	98.5537	98.7408	98.716	95.4072	96.212	96.4149	94.8646	97.3421	97.3219	90.2551	97.3329	96.8824	98.4441	96.1376	97.3076	96.2386	96.5554	96.3276	97.6676	96.3727	97.009	95.9149	98.6877	96.3103	98.539	98.6959	98.7912	97.3173
3546.56	98.8356	99.055	99.1131	97.8311	98.5233	98.6655	96.0222	95.83	95.7205	92.7268	92.9613	93.4588	94.1259	94.6142	94.7599	97.0427	95.5975	95.5646	95.647	94.2303	96.9724	98.5173	98.734	98.7357	95.4643	96.1748	96.397	94.8083	97.355	97.36	90.3712	97.4325	96.8598	98.4233	96.0336	97.2413	96.2837	96.5126	96.3627	97.7784	96.4204	97.054	95.9142	98.6725	96.4147	98.6195	98.7547	98.7694	97.3423
3544.7	98.8228	99.096	99.1012	97.7931	98.4462	98.6307	96.0647	95.8599	95.7016	92.8289	92.9149	93.4108	94.1501	94.5902	94.7579	97.0777	95.6825	95.5134	95.6505	94.278	96.8988	98.535	98.6849	98.7225	95.4367	96.2186	96.3219	94.8321	97.3226	97.3167	90.4386	97.5587	96.9659	98.4162	96.022	97.094	96.3175	96.5171	96.3451	97.7642	96.4151	97.0726	95.8974	98.6105	96.3806	98.6579	98.7762	98.7769	97.2916
3542.83	98.8362	99.1313	99.199	97.7816	98.3667	98.6025	96.1082	95.8512	95.6848	92.8186	92.844	93.3457	94.1073	94.5211	94.7159	97.0554	95.7665	95.4519	95.6082	94.2917	96.8703	98.5871	98.7102	98.6004	95.3624	96.2304	96.2626	94.8573	97.3126	97.2874	90.4135	97.5335	97.0219	98.4604	96.046	97.0789	96.3062	96.5689	96.2716	97.6846	96.4424	97.0609	95.8324	98.686	96.3303	98.6341	98.7378	98.8014	97.2426
3540.97	98.8045	99.0881	99.1649	97.7632	98.3619	98.6286	96.0662	95.7803	95.6187	92.7312	92.8992	93.3027	94.0188	94.5225	94.6817	96.9871	95.7319	95.4723	95.5579	94.2382	96.8499	98.527	98.7358	98.5612	95.2766	96.1318	96.2897	94.8031	97.3006	97.3436	90.3795	97.4243	96.9734	98.4888	96.0894	97.1338	96.3277	96.4994	96.2256	97.6695	96.4329	97.0473	95.7719	98.7609	96.2874	98.6174	98.6867	98.8013	97.2363
3539.11	98.7874	99.0517	99.0867	97.7904	98.384	98.5862	96.048	95.7657	95.5696	92.7344	92.9596	93.2763	93.9216	94.5574	94.7091	96.9307	95.6454	95.505	95.5695	94.1872	96.8256	98.5343	98.6909	98.6316	95.2071	96.0881	96.2886	94.8038	97.3231	97.351	90.2927	97.3918	96.8473	98.4839	96.1416	97.1444	96.2977	96.4921	96.2879	97.7151	96.3894	97.0268	95.8117	98.7105	96.2304	98.554	98.7005	98.8303	97.2552
3537.24	98.8329	99.0164	99.0622	97.7725	98.3869	98.5702	96.0389	95.733	95.5326	92.7269	92.9231	93.261	93.861	94.4668	94.735	96.9659	95.5802	95.5105	95.5913	94.1399	96.8363	98.5992	98.6484	98.7322	95.1749	96.0597	96.2704	94.8335	97.3278	97.3113	90.3048	97.3662	96.8272	98.4766	96.152	97.176	96.2816	96.5144	96.3321	97.7898	96.336	97.0456	95.8072	98.6536	96.1456	98.5044	98.7136	98.8129	97.2473
3535.38	98.7825	98.9941	99.131	97.6964	98.3913	98.5778	95.9419	95.6955	95.5033	92.6987	92.8314	93.2411	93.8911	94.3972	94.7493	96.9891	95.5946	95.4929	95.5452	94.0296	96.8106	98.6034	98.6514	98.7686	95.179	96.0279	96.2687	94.8042	97.2897	97.2564	90.3385	97.3477	96.8925	98.4905	96.0589	97.2653	96.3621	96.5532	96.3694	97.8197	96.3206	97.0452	95.7949	98.6419	96.1325	98.5673	98.6881	98.7764	97.175
3533.52	98.6969	99.039	99.1215	97.8216	98.4444	98.5466	95.8693	95.6952	95.4978	92.6507	92.6562	93.1787	93.9413	94.4322	94.7223	97.0004	95.6016	95.4353	95.499	93.9835	96.7872	98.5815	98.6156	98.6475	95.1818	96.0334	96.1803	94.7245	97.31	97.257	90.3147	97.3428	96.8568	98.4983	95.9652	97.2754	96.3252	96.6014	96.3289	97.7705	96.3402	97.005	95.7639	98.6276	96.2396	98.6242	98.7024	98.7959	97.1385
3531.65	98.6421	99.0795	99.0825	97.9149	98.4806	98.5272	95.8858	95.6401	95.4499	92.6061	92.5934	93.1009	93.8991	94.4339	94.5946	96.9916	95.5657	95.4012	95.4862	94.0043	96.8039	98.5952	98.5825	98.5121	95.1059	95.968	96.0459	94.6072	97.3095	97.3314	90.2739	97.352	96.7887	98.4662	96.005	97.1557	96.2165	96.6134	96.2364	97.686	96.3538	96.9873	95.7144	98.6265	96.222	98.5952	98.7155	98.8132	97.1553
3529.79	98.6838	99.0593	99.1209	97.9018	98.4078	98.5302	95.8377	95.6399	95.3567	92.6171	92.68	93.1376	93.9032	94.3656	94.5299	96.9376	95.6155	95.3411	95.4832	93.9908	96.8263	98.5722	98.5617	98.4951	95.067	95.9039	96.0879	94.5887	97.3049	97.2595	90.1766	97.3336	96.776	98.3848	96.0871	97.1089	96.2361	96.5888	96.1844	97.6613	96.3501	97.021	95.6727	98.5863	96.1005	98.4833	98.7113	98.8017	97.1317
3527.92	98.7248	98.9862	99.1097	97.8702	98.3182	98.4899	95.7811	95.6535	95.2914	92.6292	92.7051	93.106	93.8824	94.3331	94.5689	96.8823	95.643	95.295	95.4854	93.99	96.773	98.5336	98.559	98.5021	95.0457	95.8299	96.1647	94.6552	97.3143	97.2019	90.1433	97.3162	96.8106	98.3691	96.0262	97.108	96.3159	96.5672	96.1911	97.6981	96.3119	97.0797	95.6687	98.5654	96.1127	98.5055	98.662	98.7444	97.1316
3526.06	98.7558	98.9137	99.1151	97.865	98.3231	98.4966	95.7977	95.5721	95.2756	92.5893	92.699	93.068	93.8213	94.3058	94.4839	96.9678	95.6362	95.3549	95.4599	94.0433	96.7319	98.5357	98.5827	98.5974	95.0413	95.8204	96.0762	94.6822	97.2733	97.2658	90.1963	97.3527	96.8463	98.3775	95.9375	97.0493	96.2684	96.6144	96.2465	97.7065	96.3113	97.0392	95.6633	98.574	96.1293	98.6202	98.6484	98.6898	97.173
3524.2	98.7778	98.9423	99.081	97.8874	98.3772	98.5632	95.8724	95.5053	95.2805	92.5614	92.6708	93.1293	93.7995	94.2958	94.4454	97.0635	95.6421	95.4132	95.4348	94.0764	96.7865	98.5221	98.6276	98.5998	95.0975	95.9102	95.9888	94.6924	97.3012	97.2766	90.2205	97.3643	96.8862	98.3416	95.9561	97.0506	96.2359	96.5868	96.2244	97.7276	96.376	97.0268	95.6245	98.6197	96.1037	98.5664	98.697	98.6825	97.1618
3522.33	98.7846	98.9601	99.0685	97.8778	98.3722	98.5978	95.8739	95.4851	95.2653	92.5758	92.6955	93.0934	93.7823	94.2603	94.4946	97.0174	95.589	95.3797	95.4128	93.9944	96.8487	98.464	98.5919	98.5434	94.9764	95.9179	95.9882	94.6746	97.3106	97.2648	90.1929	97.3451	96.8602	98.3588	96.0211	97.1292	96.251	96.5597	96.206	97.7252	96.3704	97.0899	95.5986	98.6241	96.0677	98.5331	98.6978	98.6908	97.1152
3520.47	98.7737	98.9902	99.1213	97.8265	98.3167	98.6118	95.8173	95.4173	95.199	92.5803	92.7625	92.9688	93.8006	94.231	94.4592	96.9119	95.5563	95.3145	95.4079	93.8676	96.8333	98.4967	98.4941	98.4932	94.8578	95.8519	95.9892	94.6336	97.2421	97.2457	90.252	97.2629	96.8486	98.4281	96.0576	97.1549	96.2898	96.6111	96.2516	97.6946	96.3388	97.0663	95.6246	98.6025	96.0329	98.5313	98.694	98.6955	97.1258
3518.61	98.7954	99.0702	99.1028	97.812	98.383	98.5828	95.7643	95.3256	95.1953	92.5505	92.7417	92.9329	93.8126	94.2667	94.4	96.9041	95.5451	95.3458	95.396	93.822	96.773	98.5252	98.4951	98.5074	94.8722	95.8698	95.9505	94.6874	97.2399	97.2257	90.3522	97.2987	96.8443	98.466	96.008	97.201	96.3595	96.5929	96.2476	97.6979	96.3521	96.9771	95.6785	98.6152	96.0544	98.507	98.6764	98.7017	97.1203
3516.74	98.7964	99.0347	99.122	97.8965	98.3736	98.5366	95.702	95.3105	95.2232	92.5586	92.6394	92.9551	93.7156	94.1847	94.4156	96.9957	95.5268	95.3774	95.314	93.8077	96.7103	98.4724	98.5643	98.5572	94.8857	95.86	95.9433	94.7637	97.3034	97.2137	90.2696	97.3493	96.7856	98.4102	96.0162	97.2277	96.3641	96.5674	96.1992	97.7338	96.3348	96.9476	95.6325	98.6024	96.0092	98.5271	98.6407	98.7702	97.0702
3514.88	98.8109	98.9365	99.1273	97.8885	98.2812	98.5607	95.6468	95.3274	95.1508	92.5522	92.5123	92.9073	93.6454	94.1387	94.3847	97.0292	95.5448	95.2921	95.2081	93.791	96.707	98.4337	98.5175	98.544	94.8725	95.7267	95.9714	94.6733	97.3428	97.2178	90.1266	97.3363	96.7228	98.316	96.0234	97.1177	96.3445	96.5325	96.1974	97.7395	96.3253	96.9825	95.5479	98.623	95.9115	98.5102	98.5961	98.8489	97.1034
3513.02	98.7827	98.9273	99.1402	97.8574	98.2957	98.5355	95.6205	95.3183	95.0635	92.5172	92.4803	92.8868	93.6507	94.1006	94.2775	96.9646	95.5815	95.2151	95.1998	93.8274	96.6914	98.4715	98.4646	98.5397	94.8377	95.7204	95.9801	94.5588	97.3306	97.191	90.1576	97.3541	96.6865	98.2962	96.0367	97.0732	96.3583	96.5124	96.2162	97.6888	96.319	97.0187	95.5051	98.6802	95.8882	98.4716	98.5936	98.8241	97.0748
3511.15	98.8098	99.0189	99.1408	97.8702	98.3438	98.5104	95.6648	95.3516	95.0271	92.5016	92.4647	92.9268	93.6283	94.0715	94.2611	96.9141	95.5372	95.2512	95.2845	93.861	96.6654	98.5209	98.4876	98.5419	94.7431	95.8593	95.9706	94.5537	97.2894	97.2473	90.1698	97.3264	96.7284	98.3599	96.0979	97.0554	96.3674	96.6115	96.2169	97.6143	96.3064	97.0689	95.46	98.6703	95.8489	98.4636	98.6316	98.7778	96.9681
3509.29	98.8704	99.0018	99.1151	97.8365	98.3168	98.5143	95.706	95.2803	94.9536	92.5481	92.3367	92.9248	93.6721	94.0753	94.2508	96.8836	95.5017	95.2778	95.2879	93.8224	96.6647	98.469	98.4905	98.6093	94.6617	95.828	95.8951	94.538	97.2686	97.2397	90.1168	97.2871	96.8074	98.4027	96.0723	97.0367	96.3091	96.6109	96.1826	97.6171	96.3514	97.0786	95.4111	98.6256	95.8231	98.489	98.6656	98.796	96.9993
3507.42	98.7312	99.0148	99.0868	97.8489	98.3074	98.5724	95.6503	95.1724	94.8923	92.5227	92.2321	92.8436	93.6661	94.1024	94.2967	96.9011	95.4775	95.2515	95.2591	93.7527	96.6201	98.4905	98.5388	98.5983	94.6308	95.7245	95.8317	94.4919	97.2114	97.1463	90.1476	97.2811	96.8134	98.3672	95.984	97.0075	96.3201	96.5408	96.1019	97.6992	96.2987	97.0506	95.3801	98.5437	95.8526	98.4478	98.6919	98.7404	97.0577
3505.56	98.6002	99.0028	99.0592	97.82	98.3925	98.5919	95.5899	95.2476	94.9293	92.4667	92.2894	92.7686	93.6271	94.1259	94.2901	96.9298	95.4751	95.232	95.3016	93.7397	96.6041	98.5611	98.5351	98.4815	94.5826	95.6771	95.8243	94.4804	97.1957	97.1685	90.1916	97.2179	96.8145	98.3537	95.9144	96.9778	96.3603	96.6082	96.146	97.7177	96.2276	96.997	95.3905	98.4688	95.8675	98.4001	98.6621	98.5923	97.0134
3503.7	98.7315	98.9385	99.0345	97.8593	98.4478	98.5954	95.5687	95.2693	94.9311	92.4817	92.3785	92.7483	93.6083	94.0675	94.2202	96.8892	95.5828	95.2219	95.2945	93.7623	96.6247	98.533	98.4352	98.3942	94.5344	95.6098	95.8042	94.5293	97.2241	97.191	90.1475	97.2096	96.7864	98.3527	95.9365	97.0071	96.3328	96.6521	96.2912	97.6999	96.2861	96.9146	95.4321	98.4935	95.8823	98.4934	98.6109	98.5526	96.9725
3501.83	98.8329	98.9437	99.0183	97.9401	98.4018	98.6312	95.5696	95.2095	94.8988	92.4758	92.3987	92.7489	93.5172	93.9603	94.1422	96.8481	95.6529	95.1981	95.1757	93.7526	96.6385	98.4841	98.4844	98.419	94.5117	95.5645	95.7649	94.4678	97.2647	97.2871	90.1302	97.3078	96.7589	98.3912	95.9498	97.0552	96.3398	96.5851	96.2687	97.6675	96.3241	96.9506	95.3804	98.527	95.8725	98.5011	98.5525	98.6222	96.9513
3499.97	98.8304	98.951	99.0551	97.9219	98.2936	98.5472	95.6081	95.1993	94.8499	92.4096	92.3212	92.667	93.4547	93.9855	94.1123	96.8865	95.5981	95.2126	95.0774	93.7333	96.5842	98.5308	98.5249	98.474	94.5221	95.5241	95.7521	94.4567	97.2996	97.2824	90.2192	97.3065	96.7945	98.4056	95.9844	97.0163	96.3348	96.5531	96.1661	97.652	96.314	97.0504	95.3515	98.5607	95.7471	98.4554	98.5358	98.6745	96.9378
3498.11	98.7886	98.9742	99.0217	97.8528	98.2116	98.4828	95.6597	95.1992	94.7571	92.3997	92.2611	92.6152	93.4188	93.971	94.1456	96.8851	95.5022	95.2217	95.1206	93.699	96.5077	98.5733	98.5089	98.4469	94.4837	95.493	95.7218	94.5649	97.2459	97.1435	90.2236	97.1964	96.7852	98.3229	96.047	96.971	96.2907	96.5336	96.1768	97.6692	96.2769	97.0612	95.3659	98.5667	95.6846	98.5255	98.5624	98.6823	96.9305
3496.24	98.7262	98.9461	98.9656	97.8233	98.2288	98.5178	95.6346	95.1499	94.7268	92.3982	92.2526	92.5989	93.4178	93.8999	94.1072	96.8005	95.4555	95.1348	95.1841	93.6527	96.5289	98.5588	98.5285	98.436	94.4377	95.5445	95.6677	94.6141	97.1764	97.1325	90.1329	97.1735	96.7538	98.3032	96.0157	97.0343	96.343	96.5208	96.2399	97.6873	96.2318	97.0446	95.3689	98.5448	95.8156	98.5288	98.5667	98.7091	96.9151
3494.38	98.6988	98.9263	99.0567	97.8584	98.2873	98.5165	95.5384	95.0511	94.7485	92.3564	92.1455	92.5468	93.429	93.8727	94.0173	96.7288	95.4183	95.1145	95.1749	93.6639	96.5503	98.5279	98.514	98.4782	94.3791	95.5441	95.6321	94.4939	97.196	97.2269	90.1236	97.1922	96.7669	98.3412	95.935	97.0556	96.4535	96.5542	96.2427	97.7243	96.2932	97.0425	95.3542	98.592	95.9091	98.4669	98.5762	98.7389	96.9051
3492.52	98.7408	98.962	99.1117	97.9453	98.3167	98.4829	95.4593	95.0229	94.7339	92.2625	91.9858	92.4383	93.3792	93.8565	94.0577	96.7359	95.3815	95.1281	95.1238	93.7176	96.624	98.5172	98.5011	98.5846	94.3599	95.5807	95.64	94.3345	97.1828	97.2301	90.0644	97.1485	96.7049	98.3138	95.9218	97.0214	96.3872	96.5877	96.1599	97.7582	96.3866	97.0451	95.2587	98.5557	95.7801	98.3969	98.6045	98.7029	96.8579
3490.65	98.7174	98.9516	99.0499	97.9348	98.3534	98.4409	95.4835	95.0502	94.6482	92.2306	91.9918	92.3966	93.3578	93.8107	94.0549	96.7754	95.4812	95.1373	95.0843	93.6949	96.6957	98.5043	98.4501	98.5784	94.4094	95.5405	95.6802	94.328	97.1843	97.1867	90.041	97.1206	96.6458	98.3236	95.9281	96.9515	96.2953	96.6205	96.1563	97.7562	96.3696	97.0963	95.2732	98.5035	95.6937	98.4233	98.5951	98.5971	96.8733
3488.79	98.672	98.9086	99.1462	97.8953	98.3167	98.4639	95.5278	94.962	94.5847	92.2201	91.9968	92.3807	93.3838	93.7924	94.004	96.8467	95.5031	95.185	95.0406	93.5664	96.6762	98.4137	98.4421	98.4085	94.4593	95.4023	95.6397	94.3292	97.1502	97.1919	90.0463	97.2309	96.6077	98.373	95.8574	96.9315	96.2564	96.5562	96.207	97.7436	96.2911	97.1059	95.3252	98.5173	95.6735	98.5391	98.5484	98.5622	96.9785
3486.92	98.6526	98.9169	99.223	97.8724	98.2598	98.5464	95.4458	94.9139	94.5764	92.1701	91.8992	92.3337	93.3844	93.7416	94.0502	96.8735	95.4256	95.1621	94.9581	93.4113	96.6052	98.3291	98.4069	98.3565	94.3877	95.3467	95.5699	94.2897	97.1444	97.1607	90.0228	97.2434	96.6317	98.3701	95.7534	96.9548	96.2391	96.5393	96.2109	97.7331	96.256	96.9962	95.3048	98.4481	95.6298	98.4545	98.5315	98.66	96.9772
3485.06	98.6313	98.9544	99.1082	97.8953	98.2283	98.54	95.3401	94.9537	94.551	92.1762	91.8799	92.2625	93.3252	93.7113	94.0066	96.8926	95.4075	95.1104	94.9451	93.4265	96.5563	98.3255	98.3652	98.4387	94.2894	95.3882	95.5206	94.2901	97.2198	97.1453	90.0444	97.216	96.6689	98.3112	95.799	96.9672	96.2424	96.591	96.1837	97.648	96.2352	96.9293	95.217	98.3818	95.6136	98.3224	98.5481	98.7254	96.8862
3483.2	98.6461	98.9521	99.0661	97.856	98.2305	98.4644	95.4058	94.9401	94.5244	92.1968	91.9372	92.2485	93.199	93.7889	93.8602	96.8867	95.3838	95.0955	95.0143	93.5261	96.5766	98.4114	98.3675	98.4962	94.2478	95.4342	95.5046	94.3147	97.2325	97.1684	90.0682	97.2243	96.6841	98.3024	95.8463	96.9874	96.2661	96.6048	96.1287	97.6032	96.2429	96.9501	95.1187	98.4644	95.5615	98.3453	98.6012	98.6726	96.8694
3481.33	98.7242	98.9794	99.0206	97.8297	98.2167	98.494	95.4348	94.9274	94.51	92.1493	91.8934	92.1785	93.1775	93.7635	93.8393	96.7875	95.3857	95.1183	95.0662	93.4979	96.5645	98.443	98.3515	98.4831	94.1979	95.4209	95.4653	94.3296	97.1715	97.1922	89.9933	97.1192	96.6669	98.3406	95.792	96.9907	96.3738	96.6439	96.0992	97.6429	96.24	96.9859	95.147	98.5041	95.5188	98.4036	98.5994	98.6164	96.8783
3479.47	98.7488	98.91	99.0067	97.8807	98.256	98.5228	95.3688	94.9141	94.5238	92.1332	91.7786	92.1148	93.2433	93.683	93.8286	96.7444	95.3701	95.1161	95.0137	93.4596	96.4824	98.4313	98.3503	98.5011	94.1556	95.3131	95.4297	94.282	97.235	97.2087	89.9508	97.0234	96.5502	98.2579	95.7796	96.9548	96.4377	96.6156	96.1122	97.6128	96.2266	96.9958	95.1822	98.508	95.5207	98.4749	98.5342	98.6129	96.8844
3477.61	98.76	98.8876	99.0277	97.9117	98.2267	98.4782	95.3869	94.8508	94.4965	92.1178	91.7321	92.1216	93.2673	93.6675	93.8159	96.8005	95.3339	95.1241	94.9523	93.4313	96.4334	98.4919	98.3595	98.5056	94.176	95.2627	95.3904	94.2487	97.2393	97.1315	90.017	96.9995	96.5338	98.1735	95.8462	96.9403	96.3334	96.6028	96.1759	97.5941	96.2418	96.9468	95.2036	98.5149	95.5089	98.474	98.5116	98.5649	96.8409
3475.74	98.7736	98.9016	98.9966	97.9032	98.1994	98.4398	95.3406	94.8171	94.3925	92.0942	91.7012	92.1719	93.2294	93.67	93.85	96.7919	95.3118	95.1158	94.958	93.4056	96.4203	98.5005	98.4382	98.4178	94.1427	95.3112	95.393	94.2526	97.1552	97.0781	90.0381	97.0686	96.5597	98.1765	95.8853	96.9556	96.2161	96.6672	96.2065	97.622	96.2341	96.957	95.182	98.5319	95.59	98.3746	98.5605	98.5355	96.8037
3473.88	98.7504	98.9018	98.9788	97.885	98.263	98.541	95.2513	94.7876	94.321	92.1279	91.6313	92.1761	93.1548	93.6122	93.8548	96.7246	95.3038	95.0648	94.915	93.3277	96.438	98.4566	98.4938	98.4005	94.1237	95.3308	95.4267	94.2301	97.1483	97.1264	89.9835	97.1159	96.5766	98.252	95.7618	96.9894	96.2454	96.6773	96.1966	97.6449	96.2095	96.9811	95.0756	98.5557	95.6602	98.3255	98.6134	98.6101	96.8217
3472.01	98.7023	98.9688	99.0102	97.9372	98.2733	98.5883	95.2948	94.7809	94.3224	92.164	91.6621	92.1492	93.1328	93.6027	93.8347	96.7598	95.2715	94.9731	94.864	93.2565	96.485	98.4127	98.4363	98.454	94.1298	95.2955	95.3883	94.2046	97.2018	97.1456	89.9891	97.0769	96.5977	98.3029	95.6819	96.9703	96.3036	96.59	96.1747	97.6668	96.2134	96.9652	95.0157	98.5307	95.5846	98.3434	98.6214	98.6689	96.7759
3470.15	98.6714	99.0034	99.0711	97.978	98.226	98.5237	95.3093	94.7346	94.3574	92.1467	91.7308	92.0905	93.0862	93.6323	93.7773	96.8177	95.287	94.9664	94.8588	93.3138	96.5172	98.4287	98.3019	98.4754	94.1112	95.2231	95.3033	94.1875	97.2183	97.1547	90.0231	97.0485	96.5465	98.3298	95.8056	96.8847	96.2549	96.5548	96.1841	97.7045	96.1894	96.9757	94.984	98.4705	95.5029	98.3902	98.5788	98.6761	96.7348
3468.29	98.6643	98.9677	99.0696	97.9436	98.2177	98.4692	95.3075	94.6488	94.3472	92.1241	91.5844	91.9908	93.0087	93.5559	93.7521	96.7724	95.2993	94.9605	94.8136	93.2957	96.4774	98.4075	98.2689	98.4706	94.0819	95.126	95.31	94.1847	97.1816	97.0985	89.9869	97.0723	96.5108	98.2482	95.8968	96.828	96.1356	96.6006	96.1838	97.7244	96.2105	96.9401	94.9817	98.4406	95.4751	98.3991	98.5205	98.6842	96.7614
3466.42	98.6393	98.969	99.0589	97.9651	98.1815	98.4663	95.2608	94.6791	94.2979	92	91.394	91.9074	92.9949	93.5027	93.7163	96.6819	95.3206	94.9034	94.7703	93.2363	96.3808	98.4345	98.3515	98.3911	94.0745	95.1011	95.3318	94.1919	97.1647	97.0336	89.918	97.1337	96.4828	98.1052	95.8058	96.8249	96.1038	96.6392	96.1203	97.6711	96.2247	96.871	94.9942	98.4818	95.4467	98.3635	98.4865	98.6233	96.8161
3464.56	98.611	98.9931	99.0263	98.004	98.1635	98.4019	95.1541	94.7571	94.2222	91.9063	91.4255	91.902	93.0422	93.5168	93.6531	96.7208	95.3092	94.9362	94.7801	93.2989	96.3992	98.4806	98.3669	98.3064	94.0904	95.1573	95.329	94.1961	97.1765	97.0519	89.9325	97.154	96.4994	98.1612	95.7796	96.8556	96.2364	96.5563	96.1006	97.5999	96.1808	96.8803	94.9612	98.4979	95.4108	98.3963	98.4747	98.5627	96.8088
3462.7	98.6968	98.9673	98.9952	97.9498	98.1924	98.3905	95.2133	94.6441	94.1457	91.9752	91.42	91.9075	93.0793	93.5154	93.644	96.7821	95.2491	94.9064	94.7635	93.2816	96.409	98.3881	98.4112	98.2613	94.0915	95.1843	95.2895	94.1857	97.1746	97.0975	89.9301	97.08	96.518	98.291	95.8947	96.8196	96.3265	96.4814	96.1301	97.6065	96.2102	96.9059	94.9676	98.4706	95.407	98.4084	98.4943	98.5963	96.7532
3460.83	98.76	98.9349	98.9949	97.9177	98.1799	98.4314	95.2536	94.4641	94.1745	92.0154	91.3224	91.8391	93.039	93.5222	93.6649	96.7276	95.2727	94.8214	94.7647	93.157	96.3202	98.3314	98.3979	98.3293	93.9964	95.1563	95.2399	94.1613	97.1511	97.075	89.8758	97.0197	96.5427	98.2507	95.9132	96.7681	96.2509	96.5401	96.1421	97.6323	96.2162	96.8809	94.9889	98.4131	95.4029	98.3343	98.5236	98.579	96.7435
3458.97	98.728	98.8743	99.0009	97.9518	98.1297	98.4265	95.1459	94.4304	94.17	92.0028	91.296	91.7845	92.9823	93.4451	93.6116	96.6818	95.3013	94.8381	94.7756	93.1144	96.299	98.373	98.2936	98.351	93.8886	95.1226	95.2341	94.1841	97.1222	97.0516	89.887	97.0952	96.5231	98.2109	95.8278	96.8448	96.1885	96.5271	96.0874	97.6093	96.1357	96.8042	95.0197	98.343	95.3549	98.2956	98.5319	98.547	96.7424
3457.11	98.699	98.7763	99.0211	97.9976	98.1049	98.3831	95.0514	94.5025	94.1214	91.99	91.283	91.771	92.9476	93.3429	93.5283	96.6439	95.3007	94.8328	94.7459	93.1158	96.4039	98.4329	98.2179	98.326	93.8584	95.092	95.2467	94.1979	97.1071	97.06	89.9678	97.1158	96.4693	98.243	95.7573	96.9524	96.1823	96.4774	96.0315	97.6283	96.0689	96.7968	95.0083	98.3731	95.3551	98.3295	98.5426	98.592	96.707
3455.24	98.6653	98.7819	98.9968	97.936	98.1668	98.3847	95.0921	94.5369	94.1427	91.9313	91.2607	91.6764	92.9037	93.2747	93.4146	96.6278	95.2446	94.8036	94.6853	93.1364	96.4332	98.3933	98.1671	98.3179	93.8421	95.1278	95.232	94.151	97.1576	97.0908	89.9748	97.0145	96.4258	98.1927	95.7331	96.9101	96.2142	96.4956	96.0482	97.5795	96.056	96.8791	94.9138	98.4785	95.3514	98.3705	98.5846	98.6067	96.6668
3453.38	98.6404	98.8062	98.9831	97.8927	98.1172	98.4273	95.1924	94.4907	94.1428	91.971	91.2501	91.5758	92.841	93.2608	93.4477	96.6625	95.1276	94.7431	94.601	93.1484	96.3666	98.317	98.153	98.2766	93.7958	95.1331	95.2017	94.0565	97.1587	97.0687	89.9085	96.9185	96.4796	98.1485	95.7312	96.8137	96.2361	96.4728	96.0757	97.4992	96.1137	96.9074	94.8929	98.4752	95.3315	98.3612	98.6323	98.5494	96.706
3451.51	98.6329	98.8109	99.007	97.8564	98.0782	98.4364	95.1593	94.425	94.0814	91.9828	91.1964	91.5785	92.8142	93.281	93.6163	96.6546	95.0863	94.6694	94.6167	93.1278	96.3	98.3282	98.174	98.3283	93.7874	95.0388	95.1462	93.9971	97.1304	97.0275	89.8143	96.9083	96.4772	98.1596	95.6904	96.7849	96.2059	96.4396	95.9975	97.5249	96.1779	96.8481	94.9162	98.3775	95.2935	98.3474	98.6097	98.465	96.7338
3449.65	98.6208	98.9112	99.0209	97.8775	98.0409	98.4638	95.086	94.3673	94.0095	91.9314	91.1685	91.6363	92.847	93.2665	93.6444	96.6191	95.0753	94.7052	94.6116	93.0959	96.2688	98.3471	98.1792	98.377	93.8113	94.9994	95.0821	93.9993	97.1157	97.0286	89.7363	96.9243	96.4379	98.1552	95.656	96.7529	96.1714	96.5264	95.9685	97.5596	96.1125	96.8063	94.8793	98.3929	95.2769	98.3391	98.5125	98.4326	96.6724
3447.79	98.6386	98.9305	98.9874	97.8797	98.047	98.4438	95.0672	94.3822	93.9989	91.9772	91.1998	91.6394	92.9218	93.2614	93.5004	96.5747	95.0322	94.7539	94.5021	93.0265	96.2507	98.3439	98.1695	98.3496	93.8085	94.9876	95.026	94.0056	97.0945	97.0357	89.7566	96.9183	96.3969	98.1842	95.6148	96.7523	96.1858	96.5276	96.0231	97.5407	96.0264	96.8212	94.8404	98.3939	95.3245	98.3093	98.4681	98.4496	96.6464
3445.92	98.6725	98.8304	99.0032	97.8513	98.1095	98.4563	95.0693	94.4422	94.0122	92.0743	91.2423	91.5893	92.9233	93.3258	93.4154	96.5556	94.9964	94.7559	94.5061	92.9431	96.219	98.3145	98.1994	98.3784	93.8022	94.9483	94.9576	94.015	97.1137	97.0926	89.762	96.9428	96.4165	98.2006	95.5638	96.7729	96.193	96.4623	96.0543	97.5159	95.9752	96.7902	94.8636	98.3558	95.3486	98.2407	98.4824	98.4831	96.6837
3444.06	98.7314	98.7936	98.9702	97.924	98.1046	98.5121	95.0592	94.386	93.9924	92.0729	91.2454	91.5784	92.8946	93.3539	93.3747	96.5012	95.0163	94.738	94.6054	92.948	96.206	98.3545	98.2256	98.3887	93.7586	94.9511	94.9483	93.9331	97.1348	97.0838	89.8031	96.9149	96.444	98.1723	95.6574	96.7945	96.207	96.5251	96.0734	97.5113	95.9455	96.7946	94.8717	98.4022	95.2137	98.1862	98.464	98.5409	96.7016
3442.2	98.7138	98.8897	98.9349	97.9749	98.0785	98.4493	94.9822	94.2818	93.8992	92.0409	91.2506	91.7008	92.8374	93.29	93.3323	96.5261	95.056	94.7166	94.5894	93.0207	96.1696	98.3486	98.2035	98.3447	93.6563	94.8988	95.0105	93.8935	97.1388	96.9762	89.8597	96.9392	96.4038	98.1262	95.7394	96.7848	96.2606	96.5519	96.0652	97.4938	96.005	96.8731	94.8117	98.4797	95.1074	98.2311	98.4439	98.5018	96.6832
3440.33	98.6284	98.9406	98.9802	98.0102	98.108	98.4279	95.0011	94.2662	93.8176	92.0742	91.2945	91.8046	92.7487	93.2668	93.3703	96.5781	95.0653	94.6993	94.4976	92.9902	96.1299	98.3042	98.2271	98.2348	93.6858	94.884	95.0628	93.941	97.1454	96.9662	89.8882	96.935	96.3594	98.1238	95.6942	96.7121	96.2153	96.4721	96.0392	97.4592	96.0546	96.8967	94.7632	98.4842	95.1403	98.2187	98.4791	98.4491	96.6869
3438.47	98.5697	98.8959	98.996	97.982	98.0645	98.5085	95.0928	94.2948	93.876	92.1875	91.2943	91.7528	92.7084	93.2361	93.4509	96.5308	95.0473	94.7092	94.4357	92.8895	96.1213	98.334	98.2598	98.1571	93.6921	94.9088	94.9916	93.9522	97.1372	97.0262	89.8055	96.8991	96.3816	98.1051	95.7087	96.6637	96.1135	96.4775	95.9996	97.4659	96.0201	96.8635	94.8394	98.4271	95.165	98.1499	98.479	98.4409	96.6905
3436.61	98.5983	98.8223	99.017	97.9688	98.0626	98.491	95.0585	94.2935	93.9022	92.2501	91.2394	91.6694	92.7749	93.1593	93.4743	96.4831	95.0407	94.7215	94.43	92.8894	96.1752	98.3132	98.186	98.2198	93.6478	94.8656	94.9381	93.9127	97.093	96.9724	89.7465	96.874	96.3983	98.0143	95.7466	96.6495	96.1018	96.5235	95.9901	97.5002	95.9574	96.8381	94.9514	98.384	95.2135	98.2152	98.5104	98.4187	96.6192
3434.74	98.6261	98.7752	99.0189	98.0538	98.1065	98.4608	94.9683	94.2806	93.796	92.2369	91.2262	91.6006	92.7819	93.1375	93.3486	96.5163	95.0621	94.732	94.4488	92.908	96.2176	98.3047	98.1282	98.3208	93.6268	94.8226	94.9693	93.8834	97.1036	96.9634	89.7597	96.8918	96.2953	98.0441	95.7419	96.6762	96.1336	96.4619	96.003	97.5481	95.9035	96.7793	94.864	98.3393	95.2322	98.3243	98.533	98.4454	96.5534
3432.88	98.6446	98.7709	98.9935	98.0872	98.0874	98.4059	94.9698	94.265	93.6695	92.2138	91.1938	91.543	92.7357	93.1191	93.2432	96.5657	95.0264	94.6997	94.4112	92.8728	96.2195	98.3608	98.1063	98.2458	93.5761	94.8353	94.9871	93.9044	97.0645	96.9614	89.7501	96.9308	96.2718	98.0945	95.6837	96.7257	96.0929	96.3826	95.9473	97.5799	95.8621	96.7289	94.7319	98.3435	95.132	98.3182	98.4724	98.4534	96.6012
3431.01	98.5871	98.6867	98.9626	98.0104	98.0528	98.4124	95.0051	94.248	93.641	92.1904	91.0536	91.547	92.6501	93.1093	93.2251	96.5052	94.9719	94.6233	94.3807	92.8559	96.1919	98.3169	98.1127	98.1885	93.5275	94.8992	94.9572	93.9079	97.0116	96.9467	89.7398	96.883	96.3209	98.1129	95.5946	96.7182	96.0593	96.3566	95.9124	97.5677	95.866	96.7392	94.7256	98.3514	95.0685	98.2649	98.4761	98.4493	96.6262
3429.15	98.5717	98.6475	98.8942	97.9509	98.0548	98.436	94.9552	94.2456	93.7218	92.1818	91.0035	91.552	92.5915	93.1082	93.2904	96.5061	94.9491	94.6377	94.3952	92.8676	96.1857	98.2615	98.1374	98.2157	93.5063	94.8697	94.8642	93.8657	97.0349	96.9583	89.6726	96.8069	96.3168	98.1121	95.5595	96.7353	96.1074	96.3753	95.945	97.5379	95.85	96.7049	94.7037	98.3587	95.0651	98.2438	98.439	98.5014	96.5719
3427.29	98.5775	98.6983	98.8478	98.0114	97.9919	98.3862	94.9396	94.194	93.7631	92.1449	91.0294	91.5362	92.5928	93.0952	93.26	96.5648	94.8863	94.6602	94.4146	92.7619	96.1607	98.2499	98.1197	98.2044	93.4641	94.7758	94.8429	93.8032	97.0123	96.9313	89.6273	96.829	96.2952	98.1154	95.5498	96.704	96.1498	96.419	95.997	97.4914	95.8436	96.6268	94.661	98.3469	95.0874	98.2096	98.3839	98.5749	96.5041
3425.42	98.5856	98.7286	98.9031	98.0218	97.9745	98.4003	94.9948	94.1616	93.7018	92.1093	91.0048	91.5128	92.6023	93.0165	93.145	96.4731	94.9016	94.566	94.4169	92.6338	96.0381	98.2964	98.0738	98.1908	93.4813	94.7499	94.8289	93.7912	96.9547	96.9364	89.6708	96.8198	96.3084	98.0873	95.5677	96.6373	96.1356	96.4411	96.0096	97.4555	95.922	96.6618	94.6389	98.2692	95.1055	98.2086	98.4424	98.561	96.4197
3423.56	98.5858	98.7542	98.9712	97.9571	98.0009	98.4119	94.9669	94.1633	93.6762	92.1651	90.9936	91.5123	92.6303	92.9646	93.1452	96.4058	94.9525	94.5408	94.3663	92.6772	96.0069	98.2806	98.0816	98.2303	93.4961	94.7856	94.7833	93.7797	97.0308	97.008	89.7192	96.7238	96.401	98.0881	95.6025	96.6947	96.1365	96.4077	95.9879	97.4929	95.9573	96.7844	94.6459	98.2659	95.0271	98.2522	98.505	98.5009	96.4261
3421.7	98.6445	98.7981	98.9081	97.9685	98.0338	98.3842	94.8807	94.0894	93.7312	92.2187	91.0825	91.5244	92.6371	92.9871	93.1959	96.4252	94.9251	94.5846	94.3222	92.7443	96.09	98.2685	98.1351	98.1545	93.4753	94.7771	94.8102	93.7315	97.0704	96.9737	89.7089	96.7815	96.4555	98.1341	95.6351	96.7516	96.1597	96.4323	95.9726	97.5231	95.8644	96.8365	94.6808	98.274	94.9704	98.2347	98.501	98.4598	96.4768
3419.83	98.6061	98.7736	98.8778	97.9675	98.0612	98.3888	94.8832	94.0252	93.7115	92.2502	91.1463	91.4898	92.6154	92.9086	93.19	96.3719	94.9085	94.5878	94.3461	92.735	96.0947	98.2891	98.1199	98.0742	93.4989	94.7845	94.8282	93.6988	97.0042	96.8824	89.6583	96.8545	96.3335	98.1306	95.6655	96.6985	96.1856	96.5203	95.9713	97.4659	95.8367	96.7951	94.6989	98.2696	95.0165	98.2436	98.4735	98.4256	96.4767
3417.97	98.5764	98.7649	98.924	98.0378	98.0474	98.3567	94.9218	94.0334	93.5762	92.2809	91.0904	91.49	92.6389	92.8702	93.2218	96.3784	94.8438	94.5804	94.3041	92.7409	96.0927	98.2719	98.0734	98.0449	93.5055	94.8351	94.7552	93.7046	96.9543	96.8893	89.6405	96.7154	96.2587	98.0799	95.6705	96.6642	96.1449	96.5006	95.951	97.4519	95.8392	96.718	94.6404	98.3416	95.0244	98.2918	98.4215	98.4289	96.4849
3416.1	98.5279	98.7537	98.9638	98.088	98.0236	98.3312	94.8955	94.0422	93.5258	92.2955	91.0911	91.5369	92.5872	92.9144	93.2526	96.4417	94.8007	94.5542	94.1929	92.7511	96.1094	98.2418	97.9944	98.0151	93.4205	94.8164	94.6955	93.6817	97.029	96.9544	89.6757	96.6575	96.2922	98.0653	95.6732	96.6669	96.0657	96.4426	95.9508	97.4701	95.7978	96.6691	94.6081	98.3638	95.0172	98.2457	98.3779	98.4529	96.4924
3414.24	98.5824	98.7318	98.9626	98.0448	98.0648	98.3646	94.8585	93.9857	93.6002	92.2896	91.074	91.5564	92.5301	92.9613	93.2308	96.4153	94.8015	94.5032	94.1808	92.734	96.1047	98.1915	98.019	98.0852	93.4442	94.7364	94.7133	93.6465	97.0626	96.9295	89.7079	96.7175	96.3077	98.0932	95.6406	96.6307	96.0458	96.447	95.9746	97.4344	95.822	96.6813	94.6587	98.2834	95.0535	98.1932	98.3821	98.4731	96.5044
3412.38	98.669	98.7325	98.9591	98.0102	98.0469	98.3839	94.8697	93.9773	93.6151	92.2791	90.9947	91.5021	92.5767	92.9764	93.1573	96.351	94.8001	94.4567	94.2404	92.715	96.0613	98.1909	98.0855	98.1402	93.4597	94.7171	94.7229	93.6586	97.0631	96.874	89.687	96.7651	96.3223	98.0662	95.5773	96.6239	96.0512	96.4738	95.9915	97.4455	95.8571	96.7085	94.6832	98.249	95.0191	98.1421	98.358	98.4699	96.5342
3410.51	98.6635	98.7169	98.9097	98.0257	97.9671	98.3689	94.8457	94.0382	93.5874	92.3256	90.9858	91.4419	92.5846	92.9829	93.1563	96.3607	94.8069	94.4437	94.2686	92.6213	96.025	98.1626	98.0963	98.0682	93.3909	94.7409	94.7398	93.698	97.0523	96.8617	89.6471	96.7414	96.2575	98.0619	95.5574	96.6567	96.0361	96.4855	95.9699	97.4541	95.8004	96.7147	94.6082	98.2949	94.9734	98.0598	98.3537	98.3965	96.5457
3408.65	98.6476	98.7482	98.8992	98.0126	97.9179	98.3956	94.8575	94.0182	93.581	92.4139	91.0637	91.4488	92.5492	92.9995	93.1311	96.392	94.8136	94.4639	94.2463	92.5606	95.9936	98.1943	98.0903	98.0557	93.3656	94.7174	94.7666	93.6752	97.0621	96.8934	89.6439	96.6433	96.1872	98.1323	95.5464	96.6749	96.0497	96.4226	95.9414	97.4367	95.7994	96.6778	94.5732	98.3214	95.0028	98.1377	98.4112	98.2979	96.4846
3406.79	98.6769	98.7217	98.9142	98.0131	97.9176	98.3599	94.8693	93.9599	93.5226	92.4376	91.0974	91.4898	92.5059	92.9335	93.1208	96.4029	94.8044	94.502	94.2145	92.5969	96.0191	98.2003	98.0492	98.065	93.3541	94.6876	94.7769	93.6701	97.049	96.9048	89.6457	96.6135	96.2719	98.1319	95.529	96.6855	96.0617	96.3384	95.931	97.4367	95.8304	96.639	94.5737	98.2924	95.0741	98.2322	98.4125	98.3069	96.4179
3404.92	98.6168	98.7022	98.9235	98.0873	97.8881	98.3162	94.838	93.9573	93.4791	92.3986	91.0915	91.5298	92.4637	92.8551	93.1406	96.3798	94.7287	94.4817	94.1925	92.6115	96.1199	98.1758	98.0198	98.0561	93.2965	94.6891	94.7641	93.6731	96.991	96.9385	89.7156	96.7101	96.3102	98.0747	95.5055	96.6388	96.1072	96.3512	95.9676	97.3981	95.8156	96.6595	94.5759	98.3214	95.1016	98.2009	98.3604	98.4262	96.4176
3403.06	98.5171	98.7341	98.933	98.1395	97.8937	98.3512	94.8003	93.9314	93.4903	92.3375	91.1574	91.5272	92.5006	92.8684	93.151	96.3226	94.723	94.4934	94.2071	92.5948	96.1234	98.2182	98.1158	98.1079	93.2677	94.7751	94.7658	93.6393	96.979	96.9604	89.7454	96.7434	96.2594	98.0781	95.4812	96.5784	96.1416	96.4582	95.9888	97.3887	95.7794	96.6351	94.5611	98.2689	95.0239	98.2224	98.3918	98.5209	96.4016
3401.2	98.5437	98.7017	98.9111	98.0936	97.9271	98.3847	94.7776	93.8819	93.4509	92.3631	91.1288	91.4959	92.5195	92.9	93.1076	96.3411	94.8276	94.4955	94.2198	92.6145	96.0489	98.2169	98.1101	98.1206	93.2592	94.766	94.6314	93.5818	96.9803	96.9246	89.645	96.6941	96.2627	98.1126	95.5418	96.6345	96.1278	96.4677	95.8942	97.4298	95.7507	96.6272	94.5293	98.2112	94.9229	98.2138	98.4989	98.4683	96.369
3399.33	98.5803	98.718	98.9168	98.0524	97.9028	98.3742	94.796	93.9057	93.4133	92.4216	90.9683	91.5039	92.4865	92.8924	93.0536	96.4203	94.7812	94.427	94.187	92.6049	96.0108	98.1497	97.9981	98.0874	93.2796	94.6367	94.5173	93.5543	97.0074	96.9385	89.5921	96.6727	96.2641	98.0781	95.578	96.6548	96.0299	96.4186	95.8573	97.4179	95.7935	96.707	94.5245	98.2712	94.9029	98.2081	98.529	98.379	96.3666
3397.47	98.5559	98.7351	98.9544	98.0515	97.9598	98.35	94.7824	93.9199	93.4785	92.4334	90.9227	91.4976	92.4696	92.8568	93.0743	96.3825	94.7061	94.427	94.1988	92.5085	96.0372	98.1045	97.9549	98.0685	93.2918	94.5514	94.5901	93.6078	97.0702	96.9712	89.5872	96.6901	96.2068	98.0096	95.6316	96.5857	95.9718	96.4043	95.902	97.362	95.8108	96.6962	94.4941	98.31	94.9555	98.27	98.4477	98.3863	96.3933
3395.6	98.5677	98.7644	98.9825	98.082	98.0219	98.3912	94.7658	93.8205	93.5345	92.4293	90.9964	91.4552	92.4522	92.8693	93.1395	96.3661	94.7319	94.4198	94.2164	92.4218	96.0442	98.1153	97.9907	98.073	93.2353	94.5998	94.6511	93.639	97.0973	96.956	89.5869	96.7201	96.149	98.0259	95.6367	96.6225	96.0585	96.4233	95.9007	97.4	95.7654	96.6213	94.4989	98.299	94.9763	98.3055	98.3887	98.4095	96.4233
3393.74	98.6764	98.7478	98.9489	98.0706	98.0026	98.3968	94.7754	93.7714	93.4441	92.3969	90.9862	91.4206	92.4829	92.8826	93.1038	96.3369	94.7198	94.4577	94.1341	92.4355	95.9674	98.1204	98.0272	98.1081	93.2205	94.6752	94.6365	93.58	97.0669	96.9133	89.5633	96.7305	96.1451	98.0636	95.5486	96.6822	96.1492	96.4629	95.9291	97.4801	95.7612	96.6228	94.4769	98.2887	94.9846	98.269	98.3511	98.416	96.4167
3391.88	98.6897	98.7216	98.8783	98.0303	97.9707	98.4006	94.7651	93.8391	93.3587	92.4547	90.91	91.4168	92.4858	92.8471	93.0665	96.278	94.6979	94.5249	94.0888	92.4176	95.9024	98.179	98.0124	98.0902	93.2194	94.6197	94.5808	93.5773	96.9728	96.866	89.5632	96.7258	96.1553	98.037	95.5262	96.7249	96.113	96.4868	95.9465	97.4665	95.7555	96.6114	94.4386	98.2396	95.0402	98.2006	98.3021	98.4526	96.3596
3390.01	98.6134	98.754	98.8913	98.0147	97.9497	98.4172	94.795	93.8407	93.377	92.5237	90.9	91.4082	92.4495	92.7923	93.0147	96.3053	94.7183	94.4739	94.1184	92.3434	95.9007	98.2136	97.9983	98.0427	93.1907	94.5307	94.5312	93.6039	96.9365	96.8489	89.5407	96.691	96.1884	98.0995	95.5406	96.6993	96.0236	96.4433	95.8945	97.4286	95.7221	96.6101	94.5036	98.2133	95.0524	98.2174	98.3057	98.4667	96.3845
3388.15	98.7007	98.7789	98.9327	98.0958	97.9392	98.363	94.8206	93.7816	93.4172	92.4834	90.8783	91.4255	92.4903	92.8125	92.9423	96.3586	94.7009	94.4573	94.1252	92.4279	95.9098	98.1018	97.9888	98.023	93.1757	94.5191	94.5547	93.5669	96.9395	96.9096	89.5337	96.6745	96.2601	98.1273	95.5464	96.6294	96.0251	96.3989	95.8662	97.4308	95.6886	96.7091	94.5881	98.2411	94.9362	98.2484	98.3451	98.414	96.3864
3386.29	98.7594	98.7954	98.938	98.171	97.9493	98.3001	94.8137	93.7509	93.4259	92.4422	90.9112	91.4208	92.5431	92.8204	92.9261	96.3325	94.6467	94.4879	94.1073	92.5163	95.9261	98.0395	98.0528	98.0271	93.1651	94.5676	94.5775	93.5357	96.9555	96.9268	89.5913	96.6945	96.2344	98.0409	95.5686	96.6388	96.0484	96.3999	95.8839	97.3922	95.6985	96.8156	94.5795	98.2514	94.8216	98.2212	98.3949	98.3598	96.2908
3384.42	98.6757	98.77	98.926	98.1975	97.9661	98.2758	94.822	93.7247	93.3822	92.4261	90.9734	91.3628	92.547	92.8109	93.008	96.2777	94.6432	94.4433	94.1155	92.5106	95.9507	98.0567	98.0317	98.0225	93.161	94.6291	94.5792	93.5742	96.9344	96.8188	89.6061	96.6711	96.1397	98.0436	95.546	96.6122	96.0482	96.3676	95.9015	97.3493	95.7759	96.7592	94.5706	98.2439	94.8173	98.2362	98.4271	98.3802	96.3309
3382.56	98.6403	98.6963	98.8691	98.1748	97.9836	98.2624	94.793	93.7159	93.3298	92.411	90.9224	91.3669	92.5114	92.8028	93.0863	96.2561	94.7201	94.4183	94.1316	92.5142	95.9508	98.0834	97.9567	97.9641	93.1569	94.6423	94.5583	93.6182	96.9301	96.7972	89.5607	96.636	96.167	98.1191	95.5208	96.5445	96.077	96.3492	95.914	97.3857	95.8298	96.6443	94.5177	98.25	94.9078	98.2085	98.4025	98.3786	96.4029
3380.7	98.6355	98.7224	98.8679	98.1535	97.9835	98.2876	94.7836	93.758	93.2984	92.4259	90.88	91.4047	92.4724	92.8538	93.0234	96.2714	94.8112	94.3996	94.088	92.4595	95.9209	98.1132	97.9551	97.9706	93.1541	94.5717	94.4995	93.6038	96.9935	96.9109	89.5471	96.6188	96.182	98.0781	95.5452	96.5714	96.1083	96.3627	95.9001	97.434	95.7611	96.6843	94.4588	98.226	94.9642	98.1083	98.4076	98.3357	96.3784
3378.83	98.55	98.737	98.8976	98.0903	97.9358	98.3292	94.8053	93.7949	93.2882	92.4473	90.9171	91.4169	92.4433	92.8851	92.9619	96.2647	94.7393	94.3865	94.0781	92.4289	95.8848	98.1106	98.0067	98.0482	93.1659	94.512	94.5169	93.5961	97.0315	96.8953	89.5779	96.6479	96.1572	98.0102	95.526	96.631	96.1171	96.3878	95.8941	97.4119	95.7107	96.6868	94.4848	98.2608	94.9543	98.1108	98.3913	98.354	96.304
3376.97	98.5697	98.7323	98.8736	98.0759	97.9391	98.3113	94.7644	93.7701	93.3363	92.4755	90.9439	91.3964	92.3979	92.7819	93.0512	96.2714	94.6447	94.4169	94.1191	92.4278	95.8957	98.1045	98.0168	98.056	93.1506	94.5173	94.4946	93.6023	96.9884	96.826	89.5919	96.6147	96.1719	98.0353	95.4811	96.6479	96.0085	96.3845	95.9852	97.3864	95.7775	96.6068	94.5072	98.2923	94.9557	98.189	98.3734	98.3908	96.2523
3375.1	98.6346	98.6769	98.9058	98.0845	97.9743	98.2799	94.7482	93.7344	93.3709	92.563	90.9096	91.3901	92.3761	92.7529	93.0898	96.2656	94.6447	94.4321	94.1385	92.3869	95.8654	98.0436	98.0014	98.0354	93.1114	94.5524	94.4456	93.5466	96.9514	96.8351	89.5177	96.5961	96.1609	98.1004	95.4548	96.6444	95.9594	96.4181	96.0516	97.3989	95.8369	96.6346	94.4853	98.2525	94.9115	98.2001	98.4083	98.4015	96.2597
3373.24	98.6085	98.6885	98.9222	98.0957	97.9969	98.3288	94.7537	93.7252	93.3615	92.5977	90.8887	91.3678	92.3804	92.788	92.9979	96.2741	94.711	94.4392	94.0984	92.3646	95.8612	98.0372	97.9603	98.0503	93.1418	94.5456	94.5084	93.4703	96.9048	96.9108	89.4806	96.597	96.1288	98.1038	95.5123	96.6886	96.093	96.481	95.9789	97.3632	95.8025	96.7003	94.4635	98.222	94.8878	98.1666	98.3421	98.4072	96.2862
3371.38	98.5382	98.7213	98.9516	98.1841	97.9376	98.313	94.7087	93.7369	93.3051	92.5316	90.9473	91.3813	92.4502	92.7999	93.0219	96.293	94.7427	94.4415	94.0272	92.4003	95.8972	98.0578	97.9618	97.9818	93.1664	94.5249	94.5406	93.5359	96.8654	96.9641	89.464	96.6176	96.1452	98.0319	95.5975	96.7331	96.1626	96.4601	95.9242	97.3358	95.7596	96.6818	94.4798	98.2474	94.9455	98.1265	98.2875	98.3774	96.2463
3369.51	98.519	98.7017	98.9388	98.2032	97.9316	98.319	94.7097	93.7253	93.2438	92.475	90.9579	91.4046	92.4975	92.8012	93.0565	96.2539	94.6533	94.3499	94.0349	92.3755	95.8878	98.0391	98.0189	97.9204	93.0781	94.5424	94.4927	93.573	96.91	96.9324	89.4609	96.6309	96.1275	98.0168	95.5616	96.7271	96.1571	96.4268	95.9328	97.3727	95.7563	96.6522	94.5068	98.2175	94.9583	98.0647	98.3362	98.3435	96.1935
3367.65	98.5689	98.6654	98.9301	98.1386	97.9428	98.3573	94.7923	93.7075	93.2345	92.5644	90.8888	91.3657	92.4353	92.7723	92.9604	96.2567	94.6593	94.3381	94.0736	92.2923	95.8544	98.0186	98.0378	97.9144	93.0454	94.5422	94.5063	93.4767	96.993	96.861	89.4679	96.6215	96.1295	98.0653	95.4648	96.7035	96.1467	96.4077	95.9016	97.402	95.7642	96.6738	94.4982	98.156	94.8868	98.0516	98.3565	98.3322	96.2146
3365.79	98.577	98.7315	98.9232	98.1055	97.9697	98.3183	94.8208	93.6393	93.2651	92.618	90.9505	91.3113	92.4279	92.7104	92.9967	96.3068	94.7329	94.3931	94.0538	92.3074	95.8273	98.0045	98.0449	97.8993	93.0676	94.5279	94.488	93.433	96.9768	96.8347	89.4279	96.6465	96.2061	98.0497	95.5058	96.689	96.0971	96.3738	95.8393	97.4214	95.7636	96.6735	94.4534	98.2183	94.8643	98.1006	98.3642	98.3431	96.1928
3363.92	98.5916	98.7538	98.8719	98.1466	97.9553	98.3076	94.8026	93.5702	93.3239	92.6149	90.9909	91.2834	92.4201	92.7215	92.9698	96.3046	94.738	94.3883	93.9878	92.3356	95.8097	98.0364	98.0409	97.9637	93.0887	94.4885	94.4583	93.4266	96.9002	96.8477	89.4613	96.6825	96.197	98.0672	95.5782	96.6784	96.0951	96.3518	95.842	97.4616	95.7662	96.6721	94.4535	98.2844	94.9222	98.144	98.3643	98.3618	96.2025
3362.06	98.6128	98.6629	98.876	98.1621	97.8938	98.3291	94.8209	93.6492	93.3196	92.6212	90.8974	91.3095	92.3571	92.7751	92.8637	96.2463	94.6881	94.4596	93.9426	92.3326	95.8821	98.0748	98.0169	98.0697	93.0362	94.5138	94.4425	93.4536	96.8388	96.8377	89.495	96.6938	96.1377	98.0696	95.5708	96.6503	96.1025	96.3376	95.8986	97.4567	95.7734	96.7175	94.4931	98.2512	94.9629	98.1481	98.3364	98.389	96.2539
3360.19	98.6095	98.6203	98.9547	98.1754	97.9128	98.2951	94.8089	93.6975	93.2061	92.5914	90.9214	91.3467	92.3235	92.7014	92.8579	96.2313	94.6091	94.4826	93.9427	92.3558	95.8936	98.0406	98.0132	98.0458	92.9827	94.524	94.3682	93.4663	96.8457	96.8174	89.4227	96.6059	96.1521	98.0567	95.5727	96.6526	96.0571	96.3933	95.927	97.395	95.8215	96.7034	94.4813	98.2162	94.8713	98.1765	98.2885	98.3827	96.2325
3358.33	98.5653	98.6558	98.8938	98.1927	97.9481	98.2939	94.7665	93.678	93.1338	92.5584	90.9953	91.3793	92.3428	92.6751	92.8885	96.2366	94.5895	94.3809	93.9626	92.3037	95.8426	97.9703	98.0132	97.9788	93.0365	94.4908	94.3413	93.5102	96.9133	96.7903	89.4332	96.4937	96.1436	98.0501	95.5165	96.6819	96.0223	96.4181	95.9094	97.3902	95.7982	96.63	94.4208	98.2205	94.7625	98.1548	98.2725	98.3436	96.1848
3356.47	98.5756	98.7482	98.7736	98.2145	97.9317	98.2845	94.7408	93.6854	93.2143	92.5718	90.947	91.4051	92.3848	92.7227	92.9355	96.2368	94.6227	94.3393	93.9935	92.2281	95.8048	97.989	97.8915	97.9862	93.1225	94.4891	94.3927	93.564	96.9574	96.8159	89.4851	96.4908	96.1726	98.0339	95.4427	96.6872	96.0287	96.3882	95.9223	97.449	95.7248	96.632	94.4174	98.1956	94.8398	98.1136	98.3225	98.3766	96.1768
3354.6	98.5738	98.7343	98.8119	98.2182	97.9336	98.2374	94.7538	93.6369	93.298	92.613	90.909	91.4199	92.4345	92.7264	92.9698	96.2247	94.629	94.4288	94.0103	92.2628	95.8138	98.0166	97.831	97.9698	93.0546	94.4906	94.4499	93.5619	96.9509	96.847	89.4953	96.4951	96.1335	98.0408	95.4468	96.7015	96.0706	96.3905	95.9472	97.4629	95.7141	96.6707	94.4407	98.1904	94.8916	98.1236	98.3939	98.4484	96.2034
3352.74	98.5178	98.734	98.8758	98.1694	97.9638	98.212	94.7758	93.5159	93.2625	92.6576	90.9722	91.3964	92.459	92.7562	93.032	96.2499	94.6501	94.4654	93.9317	92.3076	95.8378	97.9589	97.9042	97.8832	92.9985	94.4844	94.4274	93.5126	96.9116	96.8528	89.4361	96.4618	96.0542	98.0463	95.4743	96.6901	96.0506	96.3888	95.9358	97.4373	95.7115	96.6861	94.426	98.1911	94.8469	98.1361	98.3819	98.4241	96.1291
3350.88	98.5013	98.7625	98.8799	98.1699	97.9751	98.2903	94.7612	93.4885	93.2541	92.6101	90.9946	91.3649	92.488	92.762	93.0234	96.2142	94.6824	94.4177	93.8751	92.2769	95.8121	97.8989	97.994	97.7797	93.0209	94.4436	94.3829	93.4668	96.9232	96.8342	89.4463	96.4638	96.1009	98.072	95.474	96.6366	96.0046	96.3604	95.9342	97.4409	95.7456	96.711	94.4132	98.1955	94.8232	98.1527	98.3359	98.3786	96.0652
3349.01	98.5592	98.7634	98.9062	98.1334	97.9624	98.2911	94.7558	93.578	93.278	92.5651	90.9151	91.3837	92.4925	92.7062	93.0119	96.1863	94.7143	94.4082	93.8922	92.2371	95.8206	97.8715	97.9723	97.861	93.025	94.4534	94.324	93.4985	96.931	96.8597	89.4639	96.4535	96.1472	98.0892	95.4619	96.6405	96.0948	96.3187	95.9101	97.4268	95.7641	96.7166	94.4521	98.1763	94.8961	98.1564	98.3083	98.3628	96.1182
3347.15	98.678	98.7747	98.9425	98.1556	97.9344	98.2527	94.736	93.5996	93.2421	92.5768	90.8695	91.4134	92.3839	92.6807	93.0265	96.2669	94.6561	94.4497	93.8995	92.1936	95.8221	97.8677	97.8724	97.9474	93.0307	94.5125	94.3649	93.4789	96.8873	96.8666	89.4317	96.4483	96.0692	98.0781	95.4642	96.6535	96.1317	96.3525	95.8867	97.3526	95.7622	96.703	94.4678	98.1596	94.9458	98.1575	98.2542	98.3423	96.1843
3345.29	98.6506	98.7454	98.9155	98.1925	97.8563	98.2587	94.6975	93.5793	93.165	92.5557	90.9252	91.4069	92.3252	92.7067	92.9352	96.2711	94.6049	94.4471	93.8816	92.1712	95.8032	97.8939	97.8679	97.8829	93.1009	94.465	94.3986	93.4327	96.8816	96.8068	89.4252	96.5179	96.0577	98.0944	95.4992	96.6297	96.0632	96.4252	95.9295	97.3361	95.8005	96.7548	94.4521	98.1554	94.8945	98.1439	98.2774	98.3029	96.1927
3343.42	98.5502	98.705	98.9207	98.2282	97.81	98.3425	94.7111	93.5338	93.127	92.5695	90.9354	91.4299	92.3953	92.768	92.9057	96.2545	94.6409	94.3987	93.9111	92.2135	95.7982	97.9632	97.9747	97.8798	93.0999	94.4628	94.3668	93.4101	96.8772	96.7995	89.4279	96.5305	96.0736	98.0489	95.4994	96.6263	96.056	96.405	95.9514	97.4131	95.7692	96.8101	94.438	98.1255	94.8762	98.1308	98.3525	98.3115	96.1867
3341.56	98.5315	98.6698	98.8768	98.2679	97.8686	98.3531	94.7482	93.4691	93.171	92.6646	90.9229	91.4097	92.4629	92.811	92.9863	96.2288	94.6126	94.3693	93.9773	92.2591	95.7483	97.9971	98.0473	97.8929	92.9957	94.4874	94.3235	93.3916	96.9105	96.8174	89.4616	96.4953	96.1074	98.0088	95.4939	96.6541	96.0548	96.3676	95.9233	97.4539	95.7154	96.7542	94.4481	98.1255	94.9193	98.1573	98.3399	98.333	96.2032
3339.69	98.4883	98.7426	98.8858	98.2299	97.9535	98.2464	94.7345	93.541	93.1818	92.6891	90.8975	91.3538	92.4466	92.7784	92.9565	96.235	94.5245	94.3984	93.976	92.2727	95.6818	97.9897	98.025	97.8775	92.9548	94.4955	94.2857	93.374	96.9188	96.8006	89.4751	96.5156	96.1558	98.0733	95.4978	96.6435	96.0605	96.4048	95.9099	97.4698	95.717	96.6897	94.4922	98.167	94.917	98.1481	98.317	98.3271	96.173
3337.83	98.4382	98.8079	98.9024	98.1587	97.9553	98.2466	94.7254	93.6161	93.1433	92.6262	90.8495	91.3645	92.4353	92.7416	92.9215	96.2821	94.5484	94.4221	93.9626	92.2393	95.7121	97.9926	97.9757	97.8653	92.934	94.5276	94.3289	93.342	96.8937	96.7836	89.4323	96.4928	96.1536	98.0926	95.4937	96.6154	96.1088	96.4055	95.9153	97.4697	95.7155	96.7067	94.4988	98.2006	94.8951	98.0857	98.3627	98.3472	96.1186
3335.97	98.5273	98.6777	98.8876	98.1406	97.8783	98.2672	94.7523	93.5367	93.153	92.5844	90.8461	91.3628	92.4353	92.7747	93.0332	96.2733	94.6093	94.421	93.9377	92.1705	95.7563	97.9749	97.951	97.863	92.9427	94.5352	94.445	93.3352	96.8829	96.773	89.3873	96.4536	96.1035	98.0602	95.4855	96.6421	96.1104	96.4104	95.9418	97.465	95.6958	96.7458	94.5008	98.2222	94.8813	98.0688	98.3938	98.3505	96.1271
3334.1	98.587	98.6206	98.8955	98.1653	97.8619	98.2861	94.7578	93.4756	93.1908	92.5475	90.8584	91.3589	92.4445	92.7619	93.0545	96.2953	94.5891	94.4324	93.8713	92.1512	95.7776	97.883	97.9844	97.8769	93.0414	94.5088	94.4764	93.3244	96.9238	96.7278	89.3973	96.4933	96.0765	98.089	95.4835	96.6776	96.1096	96.4337	95.9256	97.5158	95.7244	96.7258	94.5564	98.2593	94.8715	98.0605	98.3613	98.3306	96.164
3332.24	98.6701	98.7385	98.9004	98.1577	97.9269	98.2963	94.7745	93.5256	93.2528	92.5711	90.8986	91.3925	92.4818	92.7201	92.972	96.3355	94.6089	94.4346	93.8658	92.196	95.7777	97.85	98.0006	97.9076	93.101	94.5028	94.3856	93.3234	96.9501	96.6977	89.4774	96.5031	96.1222	98.0761	95.4677	96.721	96.1105	96.3979	95.8554	97.5614	95.817	96.728	94.5813	98.2775	94.9101	98.0285	98.3584	98.287	96.1302
3330.38	98.6914	98.7852	98.9048	98.1478	97.9746	98.3056	94.8324	93.5587	93.2754	92.6612	90.9342	91.411	92.5184	92.7807	92.9732	96.2821	94.6684	94.4357	93.9166	92.2615	95.75	97.9572	97.9664	97.8949	93.0754	94.5566	94.3072	93.3783	96.9069	96.7894	89.5012	96.5173	96.1294	98.0368	95.4429	96.7382	96.129	96.3616	95.9002	97.5058	95.8707	96.7572	94.5383	98.2592	94.9091	98.0157	98.3722	98.2708	96.0906
3328.51	98.6436	98.7576	98.8796	98.2022	97.9589	98.2768	94.8907	93.529	93.2753	92.6649	90.9098	91.4416	92.5753	92.8026	93.006	96.2335	94.6679	94.4579	93.9104	92.2404	95.7084	97.9741	97.9408	97.8744	93.0756	94.5854	94.3384	93.4532	96.8818	96.8682	89.4652	96.554	96.1242	98.0525	95.4607	96.6847	96.187	96.3376	96.0055	97.4032	95.8389	96.762	94.4998	98.189	94.8824	98.0709	98.3634	98.3107	96.0495
3326.65	98.6155	98.768	98.8965	98.2279	97.9363	98.2487	94.861	93.5317	93.1653	92.6046	90.9035	91.4563	92.5627	92.7769	92.9703	96.2607	94.6307	94.491	93.8568	92.1653	95.759	97.9425	97.9581	97.8711	93.097	94.455	94.4641	93.4408	96.9127	96.7692	89.4664	96.5803	96.1612	98.0493	95.4955	96.66	96.1704	96.3141	96.0293	97.3881	95.779	96.7864	94.5284	98.1588	94.9437	98.1486	98.4016	98.3723	96.0055
3324.78	98.6146	98.7681	98.9064	98.2071	97.9424	98.2663	94.8118	93.5689	93.1252	92.6313	90.9185	91.4255	92.5231	92.7558	92.9477	96.2508	94.6511	94.4666	93.8742	92.145	95.741	97.9517	97.9769	97.8362	93.0792	94.4196	94.4852	93.4162	96.9036	96.688	89.4811	96.568	96.1644	98.0442	95.5133	96.6946	96.0926	96.3464	96.0318	97.3978	95.7331	96.7725	94.5968	98.1688	94.9979	98.1706	98.4132	98.4098	96.0499
3322.92	98.6885	98.7527	98.9404	98.12	97.9962	98.2798	94.772	93.5575	93.2233	92.6466	90.9273	91.3968	92.456	92.7523	93.0305	96.2425	94.6929	94.4021	93.8896	92.1672	95.6609	97.9438	98.035	97.8599	93.0753	94.4983	94.4084	93.423	96.8649	96.7418	89.5111	96.534	96.1981	98.048	95.4959	96.7363	96.0893	96.3477	96.0253	97.3691	95.7297	96.753	94.5738	98.1539	95.0101	98.1485	98.3581	98.3938	96.0772
3321.06	98.6071	98.8001	99.0008	98.1406	98.0287	98.3361	94.7603	93.5324	93.2369	92.6042	90.9252	91.3535	92.4348	92.8125	93.0789	96.2658	94.6553	94.4133	93.9088	92.1665	95.6961	97.9319	98.0767	97.8802	93.0912	94.5433	94.4196	93.4008	96.8634	96.7743	89.5136	96.4964	96.1622	98.0644	95.4942	96.7548	96.1015	96.3224	95.9583	97.3725	95.7792	96.7654	94.4972	98.105	94.9686	98.1348	98.387	98.3826	96.0815
3319.19	98.5609	98.7742	98.9749	98.1588	97.9817	98.3681	94.8483	93.5732	93.1895	92.6355	90.8657	91.335	92.4575	92.7986	93.0748	96.3026	94.6165	94.4059	93.947	92.1579	95.7788	97.932	98.0075	97.8674	93.0846	94.5104	94.4728	93.3584	96.8601	96.7841	89.4529	96.4832	96.1103	98.1356	95.5296	96.7311	96.0821	96.358	95.9197	97.3857	95.8513	96.8202	94.4935	98.0805	94.9551	98.1254	98.4004	98.3824	96.0661
3317.33	98.5641	98.6991	98.9342	98.1981	97.9601	98.304	94.8943	93.5614	93.1428	92.6563	90.8257	91.3596	92.5441	92.7745	93.0837	96.3404	94.5833	94.4539	93.9193	92.1078	95.8231	97.8938	97.9197	97.8391	93.058	94.4848	94.463	93.3459	96.8578	96.7962	89.4404	96.4812	96.095	98.1611	95.5291	96.6842	96.0825	96.3848	95.9522	97.3694	95.8291	96.8073	94.5237	98.1826	94.989	98.0831	98.3593	98.3392	96.0593
3315.47	98.5489	98.7163	98.912	98.2241	97.9708	98.2541	94.7861	93.5019	93.1667	92.6326	90.8333	91.3854	92.6258	92.787	93.1347	96.2913	94.5741	94.4737	93.8805	92.1219	95.8042	97.9112	97.9552	97.8019	93.0238	94.5205	94.4099	93.3669	96.8809	96.8133	89.5226	96.5643	96.1118	98.152	95.5114	96.7151	96.1068	96.3778	95.9485	97.4402	95.8083	96.7265	94.5759	98.258	94.9443	98.096	98.333	98.3057	96.0535
3313.6	98.4231	98.8091	98.9544	98.203	97.9405	98.2669	94.7155	93.574	93.26	92.5844	90.8103	91.3714	92.6685	92.8208	93.1063	96.2732	94.6604	94.4742	93.8996	92.1936	95.7945	97.9643	97.9595	97.8618	93.0384	94.5305	94.3972	93.4063	96.9453	96.8209	89.5194	96.6154	96.1911	98.1256	95.5478	96.7608	96.117	96.4097	95.9685	97.4895	95.8384	96.7788	94.6008	98.2179	94.9249	98.1602	98.3552	98.3215	96.1013
3311.74	98.4565	98.8496	99.0481	98.2207	97.9212	98.308	94.7612	93.5963	93.3199	92.5299	90.8224	91.3401	92.6412	92.8758	93.0718	96.3524	94.6746	94.513	93.9163	92.211	95.8369	97.9456	97.9126	97.92	93.0952	94.5669	94.4148	93.4068	97.0049	96.7998	89.4589	96.5334	96.1924	98.0897	95.5821	96.7443	96.1572	96.4445	96.0817	97.4501	95.8042	96.8503	94.6155	98.2245	94.9845	98.2062	98.4415	98.408	96.1405
3309.88	98.6365	98.8016	99.0263	98.2579	97.9583	98.309	94.7822	93.5325	93.2766	92.4772	90.8664	91.298	92.5708	92.8777	93.086	96.3595	94.7259	94.5372	93.911	92.2218	95.8517	97.9325	97.9711	97.8988	93.0802	94.6004	94.4234	93.4442	96.9923	96.8155	89.5226	96.4407	96.1036	98.0839	95.593	96.7908	96.1961	96.449	96.0868	97.4502	95.7543	96.8396	94.6468	98.2243	95.0524	98.2251	98.4375	98.4658	96.0718
3308.01	98.6872	98.7292	98.9045	98.2267	97.9531	98.2918	94.7592	93.5478	93.1801	92.4256	90.833	91.2731	92.5912	92.8689	93.1243	96.2926	94.751	94.5354	93.8972	92.1932	95.8001	97.9069	98.071	97.8724	93.079	94.6309	94.4637	93.3953	96.8916	96.8384	89.5989	96.4781	96.0849	98.1224	95.5797	96.8225	96.137	96.4082	95.9654	97.4616	95.7636	96.8147	94.6057	98.1833	95.015	98.196	98.3811	98.3887	96.0073
3306.15	98.6302	98.7189	98.8618	98.2187	97.9524	98.2956	94.7674	93.5406	93.1543	92.3513	90.739	91.2772	92.6286	92.8585	93.0817	96.261	94.652	94.5326	93.919	92.1519	95.7468	97.9305	98.0344	97.8698	93.1013	94.6415	94.5032	93.3182	96.8381	96.828	89.5589	96.5316	96.1638	98.1174	95.5353	96.7491	96.0987	96.3938	95.934	97.4666	95.7873	96.7792	94.5532	98.1675	94.9253	98.1502	98.3135	98.3369	95.984
3304.28	98.602	98.8039	98.9223	98.2118	97.9518	98.285	94.7859	93.5165	93.1719	92.3211	90.6894	91.1771	92.6144	92.8664	93.0796	96.2568	94.6174	94.5284	93.9416	92.1255	95.7044	97.9492	97.983	97.8695	93.1184	94.5842	94.5193	93.3753	96.8723	96.8036	89.4893	96.4965	96.2271	98.0578	95.5156	96.7035	96.1335	96.4451	95.9943	97.4835	95.7488	96.7725	94.5597	98.1434	94.9246	98.114	98.2831	98.3131	96.0296
3302.42	98.6048	98.8222	98.9377	98.1904	97.9425	98.2859	94.7776	93.5496	93.1732	92.3042	90.6556	91.0453	92.6343	92.882	93.1472	96.311	94.642	94.5092	93.8638	92.1118	95.6997	97.9154	98.005	97.8974	93.1283	94.5274	94.5219	93.3868	96.8879	96.7455	89.4606	96.5009	96.214	98.0754	95.5197	96.7084	96.1079	96.4555	96.0263	97.5364	95.7382	96.8079	94.5968	98.1368	94.9827	98.0408	98.2949	98.3093	96.0469
3300.56	98.533	98.7935	98.8939	98.1781	97.9724	98.2904	94.7812	93.5554	93.2041	92.2555	90.6458	91.0826	92.6606	92.869	93.1515	96.355	94.6458	94.4797	93.8347	92.1827	95.7254	97.8952	98.0234	97.9585	93.1301	94.573	94.4778	93.3493	96.9126	96.7335	89.5227	96.5436	96.1766	98.095	95.4581	96.7202	96.1125	96.4977	95.9931	97.564	95.8695	96.8111	94.5984	98.1501	95.0364	98.025	98.3208	98.362	96.0208
3298.69	98.5744	98.8077	98.8739	98.1566	97.9613	98.249	94.7612	93.4975	93.2548	92.2944	90.7073	91.1724	92.635	92.874	93.1047	96.3799	94.6733	94.5149	93.8344	92.2315	95.7307	97.9125	98.0094	97.9311	93.0951	94.6406	94.467	93.3623	96.9543	96.7832	89.548	96.5012	96.1499	98.0522	95.4195	96.7516	96.1779	96.4971	95.9721	97.5125	95.9635	96.7345	94.5916	98.1497	95.0265	98.0881	98.3286	98.4129	95.9958
3296.83	98.6413	98.8037	98.8782	98.1576	97.9209	98.282	94.7744	93.4609	93.2269	92.3934	90.7154	91.1863	92.6168	92.8675	93.1274	96.3707	94.7327	94.4999	93.8032	92.1659	95.6957	97.9694	97.9931	97.8313	93.0779	94.6425	94.4562	93.3397	96.9243	96.8217	89.5645	96.4752	96.1432	98.0543	95.4994	96.7656	96.1895	96.4486	96.0044	97.463	95.8915	96.7286	94.6446	98.1455	95.0082	98.1172	98.2789	98.4308	96.0323
3294.97	98.7128	98.7988	98.9301	98.2357	97.9629	98.3816	94.7794	93.5041	93.1953	92.4165	90.7063	91.1712	92.6511	92.8239	93.155	96.3125	94.7693	94.5022	93.8846	92.0953	95.7002	98.0182	98.0161	97.8041	93.1089	94.6051	94.5273	93.2937	96.8353	96.8222	89.5691	96.5023	96.1459	98.0867	95.5707	96.7485	96.1823	96.4686	95.9725	97.4501	95.8178	96.8356	94.668	98.1515	95.0244	98.1623	98.2838	98.3896	96.0275
3293.1	98.6943	98.8043	98.9157	98.1906	97.9478	98.3824	94.7794	93.5764	93.2238	92.3982	90.7949	91.2082	92.6607	92.7675	93.1245	96.2888	94.7487	94.489	93.9235	92.1256	95.7023	97.9562	98.0187	97.856	93.1071	94.6194	94.5456	93.2631	96.7975	96.7942	89.6019	96.5282	96.185	98.1126	95.6128	96.7591	96.1972	96.5052	95.9729	97.4833	95.8476	96.8632	94.6731	98.1927	95.0318	98.2101	98.359	98.3486	96.0346
3291.24	98.6731	98.8289	98.8764	98.1514	97.9025	98.3416	94.8544	93.5854	93.1913	92.3991	90.9017	91.3257	92.6661	92.8173	93.1656	96.299	94.692	94.5189	93.8276	92.1327	95.6936	97.9349	98.025	97.8144	93.1343	94.6379	94.569	93.3192	96.827	96.7648	89.6289	96.5566	96.2254	98.1335	95.5984	96.7825	96.1667	96.4828	96.0297	97.5566	95.8827	96.803	94.6898	98.2279	95.0055	98.2075	98.3892	98.3611	96.0304
3289.38	98.6049	98.8408	98.9267	98.1673	97.8998	98.35	94.8486	93.5455	93.1539	92.4123	90.9155	91.4254	92.6365	92.9472	93.2253	96.3498	94.6804	94.5602	93.7637	92.133	95.7053	97.994	98.0719	97.8067	93.177	94.6	94.5789	93.4828	96.8624	96.8268	89.6121	96.5786	96.2172	98.1931	95.5861	96.7817	96.1586	96.4213	95.9941	97.5738	95.887	96.7559	94.6703	98.2542	94.9909	98.2035	98.3921	98.3543	95.9958
3287.51	98.4704	98.8135	98.9316	98.1214	97.912	98.3532	94.7506	93.5336	93.1664	92.4857	90.9179	91.4406	92.6518	92.9777	93.2487	96.3907	94.6733	94.5344	93.7991	92.1618	95.7177	97.9974	98.0182	97.9026	93.2018	94.5346	94.561	93.5274	96.8508	96.8376	89.6171	96.5734	96.1991	98.2416	95.61	96.739	96.2073	96.3797	95.9175	97.5241	95.8668	96.7991	94.6266	98.2462	95.0023	98.1792	98.3881	98.3696	96.0177
3285.65	98.4905	98.7632	98.8768	98.0794	97.9611	98.3534	94.7089	93.4882	93.1697	92.5326	90.9885	91.4159	92.709	92.9672	93.2607	96.3272	94.7171	94.501	93.8636	92.1548	95.7693	97.9778	97.9619	97.9926	93.1847	94.5484	94.5889	93.4246	96.8812	96.8081	89.6034	96.526	96.1877	98.215	95.6241	96.7028	96.2146	96.4343	95.9053	97.4656	95.9091	96.867	94.624	98.2001	95.0263	98.1507	98.3985	98.3763	96.0238
3283.78	98.5935	98.7178	98.908	98.1223	98.0045	98.3558	94.7126	93.4556	93.2287	92.5076	90.9999	91.417	92.7615	92.9306	93.2827	96.2911	94.7425	94.4959	93.916	92.1577	95.7651	97.975	97.9182	97.9627	93.1174	94.6636	94.5718	93.3505	96.9381	96.8304	89.6377	96.5118	96.2181	98.1842	95.6218	96.7243	96.2111	96.5511	95.9989	97.5065	95.9681	96.9087	94.6854	98.1994	95.0677	98.1379	98.4385	98.3356	95.9895
3281.92	98.5922	98.7005	98.9464	98.2032	97.9828	98.3564	94.7374	93.5377	93.2913	92.5303	90.9476	91.4458	92.7571	92.9722	93.2898	96.3234	94.7158	94.5435	93.9313	92.1986	95.7194	97.9646	97.9237	97.9281	93.1618	94.6898	94.5838	93.3284	96.9286	96.815	89.6702	96.5551	96.2368	98.1701	95.6002	96.7662	96.2423	96.5601	96.0601	97.6145	95.9441	96.9297	94.751	98.2755	95.0897	98.1	98.4143	98.3546	95.9433
3280.06	98.4901	98.7476	98.9342	98.1776	97.9668	98.3143	94.7608	93.615	93.2754	92.6378	90.99	91.4954	92.7651	93.0675	93.3343	96.3791	94.7552	94.644	93.9591	92.1809	95.7289	97.9581	97.9579	97.9609	93.2498	94.6582	94.5826	93.367	96.8985	96.7895	89.6037	96.5997	96.2408	98.14	95.6445	96.7571	96.2183	96.4872	96.065	97.6496	95.9671	96.8646	94.7564	98.2875	95.0753	98.0668	98.3169	98.4488	95.9939
3278.19	98.502	98.8153	98.9147	98.1012	97.9531	98.2827	94.7774	93.5965	93.2271	92.6573	91.0832	91.5219	92.7952	93.0637	93.3625	96.3653	94.774	94.6633	93.9196	92.165	95.7366	97.9534	98.0186	97.9559	93.2388	94.6776	94.566	93.4726	96.8594	96.785	89.5949	96.5782	96.2235	98.1604	95.6474	96.7479	96.193	96.4722	96.125	97.6299	96.0228	96.8334	94.7413	98.2143	95.0801	98.1132	98.3223	98.4545	96.0283
3276.33	98.5466	98.8058	98.9446	98.0984	97.9692	98.2688	94.833	93.5578	93.2173	92.5952	91.1023	91.5794	92.8706	93.0271	93.3934	96.3678	94.7415	94.6122	93.9267	92.2074	95.7438	97.9866	98.0213	97.9266	93.2303	94.7282	94.6835	93.533	96.8606	96.8122	89.6222	96.5851	96.2121	98.1857	95.6257	96.8195	96.2325	96.4914	96.1553	97.61	96.0185	96.8638	94.7301	98.1979	95.1083	98.1624	98.3719	98.39	96.0947
3274.47	98.5577	98.7843	98.9885	98.1168	97.9783	98.2703	94.9032	93.5409	93.186	92.6232	91.1147	91.6549	92.9111	93.0416	93.4058	96.4683	94.7401	94.6589	93.9625	92.2142	95.7926	98.0197	97.9633	97.9883	93.2939	94.7317	94.7531	93.5476	96.9322	96.8404	89.6287	96.5956	96.2641	98.1362	95.6496	96.8419	96.2799	96.5133	96.0842	97.6014	96.0037	96.8787	94.7095	98.2759	95.1374	98.1372	98.3255	98.4226	96.1925
3272.6	98.5644	98.7901	99.0192	98.1563	98.0297	98.344	94.9214	93.5749	93.1864	92.6274	91.2001	91.6628	92.8623	93.0899	93.3749	96.4532	94.7875	94.7206	93.9519	92.2255	95.8041	97.9938	98.0102	98.0285	93.3568	94.7189	94.7227	93.5272	96.9452	96.85	89.6615	96.5762	96.2634	98.087	95.6516	96.8168	96.266	96.5648	96.0024	97.5957	96.0029	96.9446	94.7419	98.2428	95.1213	98.0992	98.2783	98.4236	96.1022
3270.74	98.642	98.8157	99.0191	98.1511	98.0859	98.3676	94.8824	93.6024	93.2302	92.6103	91.2768	91.6643	92.8213	93.1322	93.39	96.4113	94.8657	94.6916	93.9326	92.2858	95.7802	98.0657	98.0394	98.0035	93.3903	94.7024	94.6603	93.5099	96.9085	96.8371	89.7078	96.6208	96.2413	98.1418	95.6803	96.804	96.2134	96.5838	95.9928	97.578	96.0016	96.9911	94.7968	98.1644	95.153	98.1234	98.334	98.3996	96.0626
3268.87	98.6828	98.8254	99.0071	98.0918	98.0735	98.3323	94.8286	93.5985	93.2681	92.6304	91.258	91.6483	92.844	93.1673	93.5002	96.4126	94.9151	94.6801	93.9227	92.3286	95.8325	98.1591	97.9912	97.9358	93.3694	94.7087	94.6299	93.532	96.9202	96.8118	89.7565	96.6637	96.2985	98.2151	95.7229	96.7941	96.1967	96.5232	96.0337	97.5653	96.0333	96.9232	94.8014	98.1784	95.201	98.2111	98.3795	98.4683	96.1213
3267.01	98.6531	98.8151	99.0043	98.0841	98.0311	98.3287	94.8253	93.6189	93.2885	92.6792	91.2163	91.6323	92.8843	93.1857	93.549	96.4243	94.9227	94.6682	93.9456	92.3325	95.8315	98.1322	98.007	97.929	93.3067	94.7516	94.691	93.5526	96.9532	96.8093	89.7285	96.6452	96.3429	98.2224	95.7431	96.8205	96.2317	96.5087	96.0693	97.5782	96.0947	96.8604	94.8293	98.2196	95.1363	98.2311	98.393	98.5473	96.1521
3265.15	98.6419	98.8289	99.0009	98.0613	97.977	98.3871	94.865	93.6502	93.3085	92.7349	91.2224	91.6828	92.9484	93.1885	93.5189	96.4234	94.9497	94.6926	93.9713	92.3442	95.8316	98.1243	98.0191	97.9627	93.288	94.7686	94.7493	93.5486	96.9574	96.8036	89.6732	96.6528	96.302	98.1975	95.7379	96.845	96.2692	96.5826	96.07	97.5642	96.1028	96.8862	94.8636	98.2636	95.1206	98.2019	98.3773	98.5528	96.172
3263.28	98.6836	98.9022	98.9705	98.1132	97.9208	98.4352	94.8525	93.6924	93.2825	92.7607	91.2691	91.7522	93.0076	93.1434	93.5216	96.4426	94.9561	94.6647	93.9953	92.3763	95.8513	98.1252	98.0511	97.9586	93.3425	94.8283	94.7869	93.5775	97.0083	96.8354	89.6771	96.6901	96.2876	98.1803	95.7255	96.8433	96.2984	96.6048	96.0982	97.5471	96.095	96.952	94.8641	98.273	95.1869	98.1848	98.3984	98.4609	96.1841
3261.42	98.6384	98.9187	98.9734	98.1773	97.9649	98.4362	94.8473	93.685	93.2582	92.7452	91.3593	91.813	93.0228	93.1687	93.54	96.516	94.9513	94.6896	94.0528	92.3754	95.8803	98.1271	98.0841	98.0054	93.4136	94.8645	94.7696	93.6477	97.0196	96.9	89.691	96.7187	96.3086	98.1837	95.7508	96.8922	96.3214	96.5965	96.1731	97.6165	96.0946	96.984	94.8318	98.2192	95.2007	98.1629	98.4629	98.3702	96.19
3259.56	98.6049	98.8742	99.0032	98.1641	98.0576	98.3676	94.8352	93.6488	93.2561	92.7072	91.4321	91.808	92.9948	93.2519	93.5339	96.5336	94.9122	94.7647	94.0944	92.3449	95.9386	98.1387	98.0727	98.0927	93.4124	94.8358	94.8022	93.6897	96.9759	96.9505	89.7536	96.7238	96.2842	98.2182	95.7771	96.9256	96.3096	96.5985	96.1795	97.6783	96.108	96.9599	94.8026	98.223	95.2123	98.1858	98.4876	98.3933	96.1817
3257.69	98.6733	98.8589	99.0325	98.1433	98.0604	98.3409	94.8112	93.6349	93.2793	92.6698	91.4046	91.7418	93.0128	93.2624	93.6011	96.5085	94.9112	94.7958	94.1232	92.3594	95.9676	98.1592	98.1051	98.0531	93.4197	94.8083	94.8156	93.7104	96.9559	96.9777	89.8283	96.6712	96.296	98.2931	95.7921	96.8827	96.2628	96.5574	96.1865	97.6728	96.1441	96.9721	94.8016	98.2716	95.2112	98.2142	98.4709	98.4504	96.1901
3255.83	98.6843	98.8726	99.0514	98.1544	98.0606	98.387	94.8176	93.6871	93.3347	92.6893	91.3675	91.7817	93.0634	93.2837	93.6878	96.5644	94.986	94.7907	94.1012	92.4757	95.933	98.1367	98.1341	98.0015	93.4597	94.8521	94.8156	93.6802	96.9347	96.95	89.8811	96.6979	96.3508	98.3215	95.7857	96.8624	96.2595	96.5629	96.2599	97.6649	96.1887	97.0101	94.8109	98.246	95.1692	98.2009	98.4291	98.4466	96.235
3253.97	98.6899	98.8888	99.034	98.1236	98.1154	98.3743	94.8104	93.766	93.3588	92.7233	91.4283	91.9022	93.0403	93.3234	93.6516	96.5682	95.0207	94.8114	94.0518	92.5142	95.9172	98.0822	98.1796	98.0201	93.4821	94.8761	94.8656	93.6606	96.9053	96.9125	89.9263	96.7493	96.3719	98.2779	95.7779	96.8664	96.2698	96.5854	96.2173	97.6947	96.1641	97.0745	94.8759	98.2625	95.1747	98.2124	98.403	98.4318	96.2842
3252.1	98.691	98.8888	99.0269	98.0786	98.1369	98.3816	94.8274	93.7885	93.3657	92.7283	91.5203	91.8955	93.0171	93.3846	93.6218	96.6003	95.0508	94.8467	94.0794	92.5005	95.8865	98.1444	98.2235	98.0285	93.4952	94.86	94.9532	93.7169	96.9236	96.8922	89.9065	96.7598	96.3901	98.2526	95.7998	96.8936	96.3026	96.5294	96.1261	97.7122	96.1619	97.1416	94.8991	98.3037	95.2506	98.2328	98.4396	98.4621	96.2884
3250.24	98.6837	98.8899	99.0494	98.0889	98.1167	98.4593	94.8357	93.8043	93.3534	92.7304	91.5474	91.8382	93.0689	93.4636	93.6184	96.6412	95.0705	94.842	94.1831	92.528	95.9077	98.1955	98.165	98.0414	93.5422	94.9053	94.9593	93.7806	96.9859	96.9494	89.839	96.7934	96.348	98.2626	95.8125	96.9656	96.3839	96.5709	96.1759	97.7396	96.2034	97.1157	94.8679	98.285	95.3127	98.2266	98.4989	98.4473	96.2661
3248.37	98.653	98.8611	99.003	98.1078	98.0503	98.4642	94.8181	93.802	93.3423	92.7337	91.5213	91.8956	93.1466	93.5023	93.6279	96.5971	95.0318	94.8464	94.2588	92.5584	95.946	98.1844	98.1042	98.1317	93.589	94.9824	94.8822	93.8418	97.0475	96.9911	89.8608	96.7742	96.3331	98.2789	95.8694	96.959	96.4263	96.6478	96.1647	97.7414	96.194	97.0708	94.9236	98.3081	95.2714	98.2858	98.5298	98.419	96.2259
3246.51	98.6644	98.8418	98.9374	98.0683	98.0833	98.4383	94.8522	93.8037	93.3271	92.7226	91.5555	91.9444	93.1581	93.511	93.6964	96.6027	95.0664	94.8986	94.2801	92.5888	95.9299	98.1569	98.1127	98.1959	93.6189	94.995	94.8806	93.871	97.0148	96.952	89.9198	96.7431	96.4265	98.2402	95.921	96.8698	96.3774	96.6365	96.0995	97.6922	96.1372	97.0945	94.9594	98.3521	95.2234	98.3136	98.5225	98.4316	96.2327
3244.65	98.7163	98.8423	98.9243	98.08	98.141	98.4317	94.8861	93.8061	93.3659	92.7283	91.5905	91.9642	93.1375	93.4796	93.7774	96.664	95.1321	94.8935	94.2605	92.6231	95.952	98.1801	98.2015	98.1967	93.5824	95.0064	94.9922	93.9018	97.0024	96.9547	89.88	96.7939	96.4944	98.1934	95.8685	96.876	96.2966	96.6706	96.1555	97.6471	96.1342	97.0995	94.9302	98.3539	95.3088	98.2579	98.478	98.4033	96.2999
3242.78	98.7142	98.8368	98.9334	98.1403	98.1765	98.4448	94.8791	93.8135	93.4172	92.7293	91.5515	92.0096	93.1367	93.4733	93.7843	96.7194	95.1469	94.8808	94.2786	92.6337	96.0208	98.2113	98.2683	98.1487	93.6488	95.0622	95.0486	93.9239	97.0046	96.9509	89.8204	96.821	96.4517	98.2399	95.8108	96.9574	96.3166	96.6782	96.1904	97.6331	96.2036	97.1395	94.9075	98.2786	95.3706	98.239	98.4888	98.405	96.337
3240.92	98.7044	98.8009	98.9771	98.0999	98.1978	98.4443	94.9033	93.7974	93.4273	92.7233	91.5696	91.9578	93.1577	93.4982	93.8025	96.6962	95.1237	94.8924	94.2962	92.6292	95.9762	98.2273	98.2184	98.1276	93.7584	95.0749	95.0617	93.9101	96.9808	96.9446	89.8366	96.8243	96.4498	98.2645	95.8003	96.9613	96.4032	96.6256	96.211	97.7165	96.2897	97.2044	94.9188	98.2292	95.3466	98.276	98.5204	98.4491	96.3437
3239.06	98.6786	98.7841	99.0156	98.0786	98.1843	98.463	94.9262	93.7822	93.4638	92.7708	91.6266	91.9088	93.1458	93.5021	93.8079	96.6826	95.1308	94.9311	94.3166	92.6829	95.9272	98.1993	98.1585	98.1239	93.7185	95.0569	95.0854	93.9108	97.0098	96.9893	89.8639	96.7989	96.5432	98.2035	95.8088	96.9491	96.4236	96.5757	96.2516	97.8224	96.365	97.1574	94.9606	98.2599	95.3128	98.3354	98.4827	98.4913	96.3308
3237.19	98.6918	98.8046	99.0032	98.0706	98.112	98.4626	94.879	93.8463	93.4794	92.7784	91.6562	91.969	93.1721	93.5492	93.8365	96.6447	95.0906	94.9428	94.3074	92.7086	95.9942	98.1602	98.1685	98.1632	93.6107	95.02	95.0573	93.9096	97.028	97.0243	89.9145	96.7845	96.5698	98.2193	95.8457	96.9924	96.4287	96.5806	96.2248	97.7855	96.3643	97.0913	94.9908	98.2715	95.3415	98.3503	98.4838	98.5171	96.3672
3235.33	98.6383	98.8093	98.9042	98.0563	98.1053	98.5131	94.8407	93.893	93.4516	92.7578	91.6424	92.0305	93.2471	93.5833	93.8845	96.6558	95.0894	94.9816	94.2978	92.6657	96.0542	98.1512	98.199	98.1729	93.6053	94.9915	94.9922	93.8819	97.0171	96.9684	89.9476	96.776	96.4696	98.2319	95.8621	96.9634	96.4379	96.6493	96.2062	97.7383	96.3456	97.1443	94.969	98.2922	95.369	98.2554	98.4887	98.4724	96.4169
3233.47	98.6052	98.8148	98.8858	98.0634	98.2243	98.4875	94.8525	93.8371	93.4048	92.7739	91.6132	92.0551	93.2607	93.604	93.877	96.6543	95.1695	94.9581	94.2999	92.6754	96.0528	98.1985	98.2171	98.1151	93.5961	94.9807	94.9824	93.8955	97.0422	96.9206	89.9026	96.7892	96.4267	98.1941	95.8442	96.9198	96.4711	96.6729	96.226	97.7253	96.3371	97.1624	94.9564	98.3542	95.3305	98.2119	98.4439	98.472	96.3602
3231.6	98.6691	98.8226	98.946	98.071	98.268	98.4263	94.8739	93.808	93.4122	92.7153	91.618	92.0856	93.225	93.6247	93.9199	96.6228	95.1778	94.9198	94.3189	92.7002	96.0302	98.2181	98.1929	98.102	93.5937	94.9854	95.0218	93.9372	97.0496	96.9538	89.8508	96.7943	96.4374	98.2014	95.8395	96.9369	96.488	96.68	96.2326	97.7109	96.3059	97.1419	94.9115	98.3875	95.3029	98.3018	98.4609	98.5533	96.3207
3229.74	98.6873	98.8167	98.9339	98.0771	98.2314	98.4363	94.8675	93.8915	93.4132	92.6568	91.6588	92.068	93.2054	93.5911	93.9608	96.6631	95.1563	95.0032	94.368	92.6855	96.0444	98.2142	98.2198	98.163	93.6613	95.0306	94.9942	94.0212	97.0694	96.9639	89.8517	96.7937	96.4202	98.2255	95.8652	96.973	96.4132	96.694	96.2873	97.7385	96.3645	97.1855	94.9005	98.3487	95.3513	98.3529	98.4838	98.5696	96.4011
3227.87	98.6266	98.8089	98.899	98.0594	98.1979	98.4673	94.853	93.9049	93.4226	92.643	91.7183	92.0324	93.2639	93.5662	93.8981	96.7361	95.2141	95.037	94.4132	92.7244	96.0271	98.2778	98.2909	98.1916	93.7428	95.0606	95.0035	94.0491	97.0829	96.9938	89.8961	96.8969	96.4298	98.2656	95.8694	96.9741	96.3577	96.7053	96.3779	97.7052	96.4244	97.2654	94.9915	98.3032	95.4023	98.32	98.4079	98.5555	96.4265
3226.01	98.653	98.8418	98.8951	98.0705	98.1832	98.4184	94.8168	93.8545	93.4432	92.6517	91.7324	92.0085	93.2623	93.6153	93.8532	96.7089	95.2168	95.0299	94.4579	92.7953	96.0429	98.3054	98.2729	98.1659	93.7494	95.0301	95.0345	93.9893	97.0754	97.0448	89.9506	96.9883	96.4931	98.3037	95.8435	96.9095	96.4099	96.6958	96.4032	97.7106	96.3608	97.3072	95.0403	98.3028	95.3947	98.2942	98.3966	98.4786	96.3595
3224.15	98.6406	98.8297	98.9172	98.0617	98.1605	98.4009	94.8115	93.9116	93.4325	92.6882	91.7245	92.0042	93.2402	93.6719	93.9237	96.7465	95.2143	94.9895	94.4211	92.7989	96.0866	98.2854	98.1665	98.1743	93.7402	95.0691	95.0476	94.0097	97.0591	97.0022	89.982	96.9483	96.4908	98.2943	95.804	96.8893	96.4525	96.6645	96.3393	97.8163	96.347	97.2528	95.0015	98.3549	95.3668	98.2873	98.4632	98.4029	96.3581
3222.28	98.6083	98.7469	98.9234	98.0218	98.1787	98.4192	94.8692	93.996	93.3335	92.6856	91.7782	92.0452	93.2843	93.6641	93.9477	96.7498	95.2349	94.9578	94.3512	92.7517	96.1091	98.261	98.1634	98.195	93.7867	95.1069	95.0428	94.0694	97.0423	96.9395	89.9287	96.8696	96.448	98.3165	95.8346	96.9219	96.4193	96.7072	96.2757	97.8553	96.3959	97.1638	94.9615	98.3736	95.367	98.3002	98.4366	98.467	96.4152
3220.42	98.572	98.7311	98.8956	98.0479	98.2227	98.4439	94.8833	93.9504	93.3226	92.6728	91.8294	92.1329	93.3516	93.6759	93.9502	96.7083	95.2912	94.9787	94.3718	92.7653	96.0694	98.2408	98.2452	98.1857	93.8384	95.0344	95.0236	94.0907	97.0092	96.9374	89.8678	96.839	96.4675	98.3313	95.879	96.8885	96.4306	96.7676	96.3031	97.8217	96.4302	97.1303	94.976	98.3232	95.3761	98.2657	98.3973	98.534	96.3821
3218.56	98.5595	98.7801	98.8452	98.0771	98.2286	98.463	94.8423	93.8555	93.4349	92.6571	91.8173	92.1933	93.3781	93.7528	94.0002	96.7024	95.3132	94.9751	94.4649	92.855	96.0951	98.2282	98.2931	98.2046	93.8013	95.0494	95.0782	94.0881	96.9627	96.9521	89.9169	96.8635	96.4324	98.2874	95.8191	96.8076	96.4437	96.7539	96.3212	97.8333	96.4621	97.1774	95.0047	98.3231	95.3537	98.2316	98.4156	98.5149	96.3536
3216.69	98.5859	98.7306	98.8035	98.0331	98.2149	98.4183	94.8836	93.8936	93.4769	92.5897	91.8264	92.1363	93.3409	93.773	93.9896	96.787	95.25	94.9917	94.4953	92.8832	96.1542	98.2293	98.2527	98.2112	93.8274	95.0844	95.1018	94.0592	96.971	96.9562	89.9629	96.8194	96.3793	98.2766	95.7942	96.8402	96.3998	96.6665	96.2922	97.844	96.4727	97.2152	94.9979	98.3296	95.2902	98.2425	98.4727	98.4965	96.386
3214.83	98.5923	98.6854	98.858	98.0309	98.1484	98.3559	94.8888	93.9142	93.433	92.5851	91.7809	92.0735	93.3019	93.7326	93.9389	96.7932	95.2263	95.021	94.4903	92.8252	96.1363	98.2663	98.248	98.2349	93.8394	95.0555	95.1186	94.0067	97.0175	96.9775	89.9651	96.8198	96.4026	98.2846	95.832	96.9226	96.4224	96.608	96.3215	97.8511	96.4247	97.206	94.9688	98.3197	95.291	98.3054	98.4869	98.4849	96.4258
3212.96	98.6076	98.6875	98.9213	98.0731	98.0877	98.3823	94.8116	93.9203	93.4322	92.6359	91.719	92.0668	93.3159	93.6864	93.9629	96.7384	95.2903	95.0483	94.5146	92.838	96.1552	98.3178	98.2983	98.2212	93.8428	95.1027	95.1321	94.0279	97.0069	96.9885	89.9672	96.899	96.5028	98.231	95.883	96.9119	96.4954	96.6766	96.3552	97.9026	96.4296	97.2297	94.974	98.2669	95.3976	98.3329	98.4782	98.4072	96.4524
3211.1	98.5753	98.7209	98.8805	98.041	98.0837	98.4445	94.8072	94.0061	93.5373	92.6278	91.7836	92.0581	93.3577	93.7058	94.0471	96.7298	95.308	95.1272	94.5228	92.9308	96.1846	98.2937	98.2748	98.1499	93.8481	95.0734	95.1259	94.0935	97.0183	96.987	89.9673	96.8884	96.5415	98.204	95.8873	96.8862	96.56	96.7746	96.3406	97.8623	96.5162	97.2573	95.0233	98.2704	95.4849	98.2917	98.4478	98.4088	96.4178
3209.24	98.5329	98.744	98.8319	97.9627	98.1456	98.4503	94.8378	94.0513	93.5521	92.5535	91.8481	92.0742	93.3457	93.7862	94.0674	96.7534	95.2907	95.1527	94.5422	92.9782	96.1436	98.2686	98.2383	98.1417	93.8017	95.041	95.1605	94.0852	97.0435	96.9501	89.9121	96.835	96.4637	98.1995	95.8427	96.8759	96.5614	96.7883	96.3401	97.8063	96.5734	97.2466	95.0081	98.3491	95.4782	98.3048	98.4534	98.4327	96.422
3207.37	98.5193	98.6696	98.8191	97.993	98.1878	98.4783	94.8705	94.006	93.461	92.5318	91.8797	92.1511	93.3386	93.817	94.0307	96.7502	95.3274	95.1134	94.5104	92.9215	96.1689	98.3098	98.2969	98.1976	93.802	95.14	95.2145	94.0813	97.0233	96.9095	89.8681	96.8867	96.4732	98.2038	95.8582	96.8609	96.5543	96.7345	96.3848	97.8233	96.5795	97.2454	94.9561	98.3321	95.4353	98.3219	98.4582	98.3931	96.4156
3205.51	98.5449	98.6375	98.8041	97.9998	98.2164	98.5052	94.8874	93.9713	93.4387	92.5667	91.9009	92.1829	93.3446	93.7701	94.0012	96.7683	95.401	95.0821	94.466	92.8715	96.1929	98.3537	98.3833	98.1938	93.8686	95.1796	95.2191	94.1495	97.038	96.9295	89.9296	96.9222	96.5124	98.2078	95.8819	96.8033	96.5477	96.675	96.4241	97.7995	96.5839	97.2737	95.0108	98.2908	95.4218	98.2713	98.4525	98.4672	96.3842
3203.65	98.5414	98.7261	98.8081	97.9121	98.2643	98.4668	94.8646	93.954	93.5163	92.5764	91.9027	92.1355	93.3823	93.7317	93.9632	96.7815	95.3694	95.0844	94.4925	92.922	96.1595	98.313	98.3733	98.1562	93.8684	95.1533	95.1861	94.1883	97.0786	96.9342	89.9846	96.8961	96.5142	98.1912	95.8527	96.7699	96.4961	96.693	96.387	97.7846	96.5507	97.2871	95.1107	98.295	95.39	98.2622	98.4385	98.5721	96.4536
3201.78	98.5589	98.706	98.7947	97.8914	98.2614	98.4851	94.842	93.943	93.5533	92.572	91.9019	92.1234	93.42	93.7782	93.9945	96.769	95.2989	95.1239	94.5673	92.9685	96.1525	98.2668	98.3394	98.1375	93.8258	95.1675	95.2177	94.1455	97.0801	96.9249	89.9348	96.9154	96.5071	98.2156	95.8605	96.8486	96.475	96.8036	96.3793	97.8431	96.5128	97.3315	95.0891	98.2793	95.3733	98.3267	98.3964	98.5414	96.5242
3199.92	98.5752	98.6053	98.7533	97.9612	98.142	98.5332	94.8513	93.9866	93.5078	92.5819	91.9266	92.1986	93.448	93.8688	94.0686	96.8039	95.3253	95.1517	94.5862	92.9855	96.1663	98.3282	98.3416	98.1327	93.8589	95.1457	95.2214	94.1247	97.0728	96.9365	89.8923	96.9272	96.5364	98.2547	95.9216	96.8958	96.5365	96.8629	96.4227	97.9093	96.5336	97.3493	94.9941	98.2584	95.4436	98.3103	98.3634	98.468	96.5104
3198.06	98.5507	98.6238	98.7198	97.9865	98.1538	98.4868	94.8772	94.051	93.5033	92.5867	91.9778	92.2891	93.4647	93.9389	94.0919	96.8246	95.3363	95.1331	94.5759	93.0327	96.1532	98.3285	98.3285	98.1858	93.9061	95.1442	95.1676	94.1852	97.0576	96.9504	89.9291	96.9558	96.5659	98.2464	95.9152	96.8702	96.5672	96.8315	96.4183	97.9304	96.5477	97.3284	94.9809	98.2521	95.4493	98.2317	98.3506	98.4603	96.4962
3196.19	98.5635	98.6692	98.7317	97.9948	98.2293	98.4382	94.8493	94.0762	93.5408	92.5642	91.9937	92.2738	93.512	93.8833	94.0693	96.8724	95.3158	95.0908	94.5756	93.0753	96.1843	98.2582	98.3272	98.203	93.8985	95.1674	95.2221	94.2376	97.0752	96.9655	89.9389	96.9768	96.522	98.2317	95.8814	96.8401	96.5538	96.7875	96.4105	97.9081	96.5591	97.3575	95.0808	98.3253	95.4196	98.1973	98.3778	98.4437	96.5121
3194.33	98.581	98.6396	98.7894	97.9356	98.23	98.433	94.8541	94.0428	93.5314	92.5829	91.9926	92.2551	93.5396	93.8272	94.0789	96.8959	95.3979	95.1153	94.6313	93.0225	96.246	98.2524	98.307	98.1674	93.9432	95.1835	95.2824	94.2254	97.1314	96.9643	89.9157	96.8906	96.4884	98.173	95.8484	96.8557	96.5628	96.7651	96.3714	97.8793	96.6014	97.3802	95.1576	98.4062	95.4706	98.2309	98.4624	98.4946	96.5717
3192.46	98.5625	98.6587	98.8095	97.8899	98.2472	98.4584	94.918	94.0092	93.5542	92.6186	91.9978	92.3637	93.5006	93.8644	94.1914	96.8445	95.4282	95.1509	94.7206	93.0036	96.2288	98.2905	98.2786	98.1604	93.9973	95.1766	95.277	94.2556	97.1274	97.0223	89.916	96.8849	96.4704	98.1345	95.8136	96.892	96.5729	96.7678	96.3525	97.8797	96.6208	97.3368	95.1646	98.4146	95.5214	98.288	98.5217	98.54	96.6136
3190.6	98.538	98.7095	98.7954	97.9883	98.2516	98.4783	94.968	94.0178	93.6209	92.5566	92.0049	92.4746	93.5248	93.9507	94.2571	96.8314	95.4456	95.1834	94.7457	93.0466	96.2283	98.3207	98.3228	98.2156	94.0176	95.1894	95.2855	94.2841	97.0921	97.0598	89.9314	96.9166	96.4607	98.1774	95.8792	96.9131	96.5509	96.8189	96.4206	97.9127	96.6107	97.3061	95.1926	98.4219	95.4822	98.2749	98.5187	98.5207	96.4994
3188.74	98.542	98.653	98.8039	98.0031	98.2274	98.4728	94.9467	94.0118	93.5838	92.4811	92.0334	92.4429	93.57	94.0276	94.2146	96.8308	95.5036	95.181	94.6807	93.0463	96.207	98.3474	98.3625	98.2937	94.0167	95.2881	95.3189	94.2541	97.0602	97.0152	89.9595	96.9125	96.5227	98.2158	95.933	96.9234	96.5236	96.8667	96.494	97.9321	96.606	97.3208	95.1972	98.4128	95.3909	98.2619	98.4395	98.4681	96.4669
3186.87	98.5765	98.593	98.7592	97.9339	98.2925	98.4673	94.9439	94.0756	93.5748	92.5058	92.1004	92.3714	93.5508	94.0654	94.2416	96.8636	95.4949	95.2083	94.6827	93.0834	96.1949	98.3512	98.3585	98.3086	94.0551	95.3495	95.3309	94.2667	97.01	96.9945	89.9947	96.9773	96.5824	98.2133	95.9547	96.9272	96.5496	96.8344	96.4802	97.9153	96.6202	97.3899	95.157	98.3573	95.4014	98.3384	98.4606	98.4641	96.5471
3185.01	98.5677	98.6267	98.7285	97.8593	98.3512	98.4782	94.9934	94.1653	93.6367	92.5504	92.1189	92.3994	93.6205	94.0689	94.3188	96.9066	95.4911	95.276	94.7451	93.1751	96.2407	98.3471	98.3685	98.3227	94.1052	95.2888	95.3127	94.3368	97.0252	97.0432	89.9962	97.0297	96.5643	98.2272	96.0054	96.9287	96.5991	96.7484	96.4484	97.8914	96.6265	97.4426	95.1859	98.3593	95.5438	98.4037	98.5122	98.528	96.5911
3183.15	98.5583	98.6627	98.8046	97.8286	98.3456	98.4621	95.0045	94.1482	93.6777	92.533	92.1181	92.4386	93.6935	94.0725	94.315	96.9167	95.5337	95.2827	94.8338	93.2202	96.3071	98.3296	98.3734	98.3215	94.1308	95.2788	95.3469	94.3469	97.098	97.1313	89.9592	97.0101	96.538	98.2438	95.9702	96.9146	96.6059	96.7327	96.449	97.8913	96.6085	97.3935	95.2477	98.3905	95.6202	98.3467	98.4425	98.5537	96.5614
3181.28	98.6221	98.6779	98.8593	97.8878	98.3255	98.4409	95.0074	94.1367	93.7084	92.5376	92.1728	92.4618	93.6996	94.058	94.2894	96.934	95.5042	95.2832	94.8852	93.223	96.335	98.3586	98.3798	98.2784	94.1749	95.3581	95.4216	94.3571	97.1394	97.1097	89.9434	97.0502	96.5532	98.2332	95.9124	96.95	96.6189	96.8008	96.4749	97.9684	96.6255	97.3205	95.2408	98.379	95.5994	98.27	98.409	98.5378	96.5112
3179.42	98.6513	98.6379	98.8173	97.9301	98.2684	98.4665	95.0113	94.1671	93.7058	92.5807	92.1869	92.5028	93.7422	94.1103	94.3074	96.9728	95.4715	95.3246	94.8479	93.259	96.3232	98.4019	98.3795	98.251	94.2085	95.375	95.4611	94.4263	97.1412	97.0637	89.9602	97.1445	96.6117	98.2331	95.9457	96.9815	96.6393	96.8868	96.5083	98.0467	96.7144	97.3137	95.2235	98.3577	95.595	98.2834	98.4198	98.5506	96.4945
3177.56	98.5991	98.608	98.7613	97.9013	98.2825	98.5231	94.9635	94.1775	93.7545	92.6216	92.1961	92.525	93.7689	94.1559	94.3186	96.9078	95.5383	95.3537	94.7923	93.2989	96.3093	98.3538	98.3894	98.2977	94.218	95.3453	95.4749	94.4438	97.144	97.1101	90.0089	97.1944	96.6044	98.2978	96.0178	96.9708	96.6119	96.9352	96.4478	98.0497	96.8154	97.3979	95.2521	98.3328	95.5849	98.3379	98.4251	98.5286	96.5284
3175.69	98.587	98.6749	98.7857	97.9213	98.306	98.5369	94.9758	94.2056	93.7934	92.6162	92.2501	92.5296	93.7647	94.1149	94.308	96.9232	95.6302	95.3365	94.807	93.2386	96.3125	98.3036	98.4062	98.3442	94.2774	95.3856	95.5023	94.4393	97.105	97.0847	90.0474	97.0792	96.5839	98.3384	96.0463	96.9882	96.5742	96.8975	96.3887	97.99	96.8015	97.4325	95.2471	98.3336	95.6071	98.3695	98.4483	98.5316	96.5937
3173.83	98.6329	98.7191	98.8623	97.914	98.2879	98.5393	95.0372	94.238	93.7941	92.5198	92.262	92.5173	93.7531	94.1471	94.3548	96.9933	95.6241	95.3307	94.8346	93.1872	96.2921	98.2663	98.4578	98.3848	94.2847	95.4224	95.4674	94.5176	97.1056	97.0628	90.0563	96.9837	96.6284	98.3201	96.0378	96.9797	96.5859	96.8704	96.4223	97.9369	96.755	97.4159	95.2723	98.3863	95.6626	98.3859	98.4308	98.5461	96.6514
3171.96	98.6366	98.6534	98.9408	97.8582	98.319	98.5234	95.0492	94.2729	93.8189	92.4807	92.2613	92.5473	93.7288	94.2155	94.425	97.0132	95.558	95.3347	94.9037	93.293	96.3368	98.3073	98.5156	98.3931	94.2832	95.4503	95.4429	94.5691	97.1872	97.1173	90.0318	96.9858	96.636	98.2858	96.0756	96.9901	96.6224	96.8475	96.4614	97.9399	96.7386	97.4553	95.3217	98.37	95.6709	98.4113	98.4491	98.5421	96.6188
3170.1	98.5643	98.6889	98.9326	97.8229	98.3633	98.5177	95.0201	94.3447	93.8675	92.5445	92.3152	92.5859	93.7472	94.2332	94.4756	97.0274	95.5805	95.3564	94.9683	93.3492	96.3584	98.3781	98.4885	98.3321	94.301	95.4666	95.4294	94.5328	97.2453	97.1168	90.0238	97.0357	96.6409	98.3184	96.1253	96.9915	96.6603	96.8078	96.4414	97.9494	96.7183	97.4459	95.3133	98.352	95.6979	98.3875	98.5325	98.486	96.6392
3168.24	98.5413	98.7683	98.8301	97.8569	98.3696	98.5272	95.0345	94.3363	93.8898	92.6075	92.3409	92.6124	93.8489	94.2882	94.4834	97.0474	95.6713	95.3779	94.944	93.3524	96.3634	98.4145	98.4422	98.354	94.298	95.4579	95.4821	94.5264	97.1813	97.0443	90.0768	97.1108	96.6742	98.3825	96.107	96.9445	96.6457	96.802	96.4493	97.9748	96.6732	97.4561	95.3139	98.4303	95.7176	98.3637	98.5657	98.4925	96.6801
3166.37	98.5643	98.7656	98.8287	97.8999	98.4171	98.4985	95.1034	94.27	93.8744	92.6214	92.3256	92.6676	93.9138	94.2834	94.4887	97.0362	95.6729	95.3952	94.9452	93.3875	96.3963	98.4258	98.4335	98.4014	94.3252	95.4967	95.5655	94.5405	97.1551	97.0338	90.0999	97.1313	96.7085	98.3873	96.0219	96.9763	96.5828	96.8289	96.4982	97.9845	96.7111	97.5179	95.3616	98.4599	95.7415	98.3852	98.5788	98.5333	96.7106
3164.51	98.6372	98.7591	98.8411	97.9667	98.4281	98.5063	95.1653	94.2612	93.8912	92.5896	92.2968	92.6869	93.8937	94.2668	94.5346	97.0285	95.64	95.4684	94.9775	93.4152	96.396	98.3992	98.4535	98.4006	94.3179	95.5328	95.5929	94.591	97.1756	97.0937	90.0537	97.1177	96.685	98.3481	95.9894	97.0406	96.5414	96.8902	96.55	98.0022	96.8131	97.5371	95.392	98.4192	95.7651	98.3631	98.61	98.4938	96.7579
3162.65	98.6498	98.7401	98.8126	97.9992	98.3792	98.5192	95.1728	94.275	93.8887	92.5707	92.3196	92.7199	93.8854	94.2939	94.5461	97.0285	95.6252	95.5179	94.9972	93.4367	96.3983	98.4169	98.5032	98.4284	94.3237	95.4996	95.6315	94.6415	97.1455	97.1463	90.0502	97.1114	96.6843	98.341	96.062	97.0206	96.5788	96.8999	96.593	98.073	96.8171	97.5357	95.4163	98.3938	95.7709	98.3447	98.5621	98.5156	96.799
3160.78	98.6579	98.7207	98.794	97.9614	98.3597	98.5211	95.1394	94.3305	93.8661	92.5487	92.4536	92.758	93.9768	94.3443	94.543	97.0136	95.6831	95.4767	94.9928	93.4528	96.3915	98.3912	98.4903	98.4407	94.3441	95.5054	95.6314	94.6368	97.1871	97.1624	90.0972	97.104	96.6878	98.3826	96.1256	97.0146	96.6403	96.8683	96.571	98.0416	96.7691	97.5007	95.4308	98.382	95.7802	98.3552	98.5131	98.6088	96.7645
3158.92	98.639	98.745	98.7246	97.9267	98.3784	98.5128	95.0993	94.3768	93.9109	92.5217	92.5414	92.7521	94.0201	94.4008	94.6042	96.985	95.7214	95.4686	94.9856	93.4346	96.3883	98.3402	98.4655	98.4258	94.4107	95.5682	95.6203	94.6315	97.2356	97.126	90.1088	97.1319	96.654	98.3957	96.1299	97.061	96.6678	96.8997	96.5205	97.9409	96.7445	97.4788	95.4646	98.4181	95.7679	98.3881	98.4908	98.5828	96.7182
3157.05	98.583	98.7449	98.7594	97.9076	98.3629	98.5575	95.1177	94.3407	93.9846	92.5711	92.5843	92.7761	93.9726	94.4269	94.636	97.0471	95.6892	95.541	94.9844	93.4731	96.4682	98.3932	98.4808	98.4099	94.5055	95.5883	95.6546	94.6456	97.2142	97.086	90.1452	97.144	96.6824	98.3522	96.12	97.0579	96.6644	96.9488	96.509	97.9322	96.8093	97.5217	95.439	98.4159	95.7472	98.3864	98.5128	98.4915	96.7525
3155.19	98.5746	98.6862	98.8534	97.9169	98.3896	98.5821	95.1827	94.3776	94.0105	92.6024	92.5992	92.8023	93.9727	94.4526	94.6303	97.1448	95.7344	95.4814	94.9998	93.5125	96.5314	98.4237	98.5173	98.4316	94.5554	95.5799	95.6462	94.6924	97.223	97.1356	90.226	97.1163	96.6953	98.3636	96.1023	97.046	96.6946	96.9596	96.5231	98.0243	96.8794	97.5466	95.3951	98.3601	95.7602	98.3781	98.5626	98.4844	96.7918
3153.33	98.5926	98.68	98.8172	97.8897	98.3916	98.5441	95.2244	94.4638	94.0305	92.5838	92.5603	92.8094	93.9806	94.4637	94.5863	97.1433	95.8258	95.4277	95.0713	93.5209	96.4844	98.364	98.5722	98.4424	94.4805	95.6085	95.6094	94.7103	97.2177	97.1544	90.2016	97.1514	96.6415	98.4095	96.1118	97.0966	96.7304	96.9205	96.5794	98.0699	96.8826	97.5463	95.4548	98.354	95.7727	98.3761	98.5617	98.5408	96.755
3151.46	98.6079	98.7097	98.7849	97.8683	98.3239	98.5302	95.2157	94.4892	94.0086	92.6051	92.5413	92.7972	94.0039	94.4323	94.5647	97.0952	95.777	95.5278	95.1397	93.5651	96.4113	98.3302	98.5935	98.4135	94.4367	95.6154	95.6253	94.6594	97.1626	97.1458	90.104	97.2317	96.6732	98.3856	96.1167	97.0736	96.7082	96.9025	96.6088	98.0237	96.8714	97.4985	95.4875	98.3889	95.7902	98.3535	98.5052	98.589	96.7272
3149.6	98.6007	98.7011	98.823	97.8828	98.36	98.5589	95.196	94.4943	93.9405	92.6124	92.5592	92.7984	94.057	94.4164	94.6545	97.0785	95.7194	95.5595	95.1208	93.5475	96.4096	98.3009	98.5909	98.4151	94.4542	95.5875	95.6824	94.5956	97.1832	97.1501	90.0547	97.2004	96.7664	98.3615	96.0563	96.986	96.6992	96.889	96.5861	98.0284	96.851	97.4592	95.49	98.436	95.8204	98.3057	98.4431	98.6176	96.7568
3147.74	98.6463	98.6952	98.8487	97.901	98.4553	98.5587	95.2275	94.4819	93.9677	92.6279	92.5691	92.8457	94.0631	94.4604	94.6871	97.078	95.7641	95.5168	95.1412	93.5303	96.4545	98.3036	98.6044	98.3988	94.5002	95.6477	95.7258	94.5801	97.2338	97.1458	90.0944	97.1606	96.7779	98.3572	96.0319	97.0265	96.7098	96.8635	96.6022	98.0906	96.8705	97.4957	95.5009	98.4754	95.856	98.3226	98.4402	98.6162	96.7583
3145.87	98.626	98.6988	98.8724	97.8987	98.4067	98.529	95.2447	94.4587	94.0202	92.6565	92.6088	92.9088	94.0601	94.5087	94.6756	97.0954	95.8094	95.5612	95.1895	93.5924	96.453	98.3986	98.584	98.4199	94.5006	95.6994	95.7476	94.6587	97.2333	97.1526	90.1571	97.2157	96.7444	98.3606	96.0832	97.0391	96.7003	96.9422	96.6602	98.1009	96.9124	97.5562	95.4888	98.4701	95.8804	98.3696	98.5301	98.5947	96.7755
3144.01	98.5919	98.6939	98.8615	97.9483	98.3803	98.5334	95.2387	94.4723	94.0871	92.6471	92.6967	92.9907	94.0923	94.5137	94.7086	97.1522	95.7927	95.6017	95.1834	93.628	96.4788	98.5082	98.5899	98.4477	94.4961	95.701	95.7393	94.7543	97.2406	97.1747	90.165	97.1888	96.774	98.404	96.1254	97.002	96.7217	97.0112	96.7079	98.0824	96.9392	97.6028	95.503	98.4551	95.8838	98.4296	98.6076	98.6012	96.8301
3142.15	98.6253	98.7189	98.861	97.9991	98.4527	98.5717	95.2721	94.589	94.1581	92.6586	92.7143	93.0162	94.094	94.5301	94.7321	97.1927	95.8506	95.5937	95.2174	93.6311	96.5544	98.5133	98.6295	98.4772	94.5563	95.7189	95.7683	94.7917	97.2556	97.2275	90.1701	97.1116	96.7828	98.3676	96.1788	97.0409	96.774	96.9757	96.7102	98.0598	96.949	97.5725	95.5279	98.4337	95.8954	98.4881	98.5793	98.5894	96.8143
3140.28	98.6782	98.7341	98.8806	97.9505	98.4672	98.5807	95.3034	94.6595	94.2173	92.6798	92.7044	92.9661	94.1219	94.521	94.7469	97.1483	95.8966	95.5696	95.1933	93.6199	96.5669	98.4379	98.6234	98.4977	94.5746	95.7209	95.7844	94.7769	97.2359	97.1903	90.1801	97.1536	96.7663	98.3028	96.229	97.086	96.7684	96.9511	96.6395	98.0446	96.9352	97.5311	95.5657	98.3837	95.9158	98.4313	98.5155	98.5816	96.776
3138.42	98.6362	98.7151	98.8478	97.8826	98.4463	98.5647	95.2569	94.637	94.2521	92.694	92.7749	92.9838	94.1519	94.4981	94.7768	97.1131	95.8724	95.6063	95.1202	93.6845	96.5225	98.4245	98.6124	98.4649	94.5808	95.7031	95.7705	94.7537	97.2082	97.1261	90.1814	97.2244	96.7309	98.3255	96.1849	97.1166	96.7373	96.9671	96.5913	98.044	96.8829	97.5453	95.5769	98.361	95.9256	98.399	98.5334	98.6006	96.8414
3136.55	98.6149	98.7449	98.8134	97.8187	98.4922	98.5526	95.224	94.6249	94.2504	92.679	92.8136	93.0218	94.1369	94.5359	94.7783	97.1577	95.8256	95.6345	95.2035	93.7264	96.5146	98.4696	98.6453	98.4574	94.6273	95.7014	95.8448	94.7919	97.233	97.1424	90.1877	97.2187	96.6995	98.3423	96.1369	97.1051	96.7589	96.9742	96.593	98.0676	96.8955	97.5887	95.5807	98.4239	95.9402	98.4273	98.6028	98.6131	96.8695
3134.69	98.6714	98.7565	98.7868	97.8393	98.5024	98.5358	95.2548	94.6552	94.2402	92.6721	92.8055	93.0097	94.1237	94.6242	94.7787	97.2018	95.8552	95.6298	95.3354	93.7851	96.5758	98.4595	98.6705	98.4921	94.6523	95.7525	95.8772	94.8503	97.2518	97.1786	90.1796	97.196	96.7433	98.3435	96.1699	97.0678	96.7729	96.972	96.6126	98.1217	96.9314	97.5705	95.6056	98.4809	95.9189	98.4246	98.5969	98.5985	96.872
3132.83	98.6555	98.754	98.7985	97.8778	98.4551	98.506	95.289	94.6675	94.2463	92.6631	92.7837	92.9903	94.1657	94.6606	94.7758	97.17	95.8787	95.6211	95.354	93.8064	96.5667	98.4335	98.6553	98.5015	94.6821	95.7954	95.8251	94.8745	97.2671	97.2473	90.197	97.207	96.8309	98.3722	96.2338	97.052	96.7595	96.9253	96.6596	98.1355	96.9892	97.5301	95.594	98.5186	95.8853	98.4626	98.5212	98.6313	96.9154
3130.96	98.5616	98.7625	98.8369	97.8669	98.492	98.5177	95.2852	94.6671	94.2648	92.6202	92.7571	93.0061	94.2115	94.6554	94.7796	97.1432	95.8988	95.6251	95.291	93.7426	96.5871	98.4382	98.6783	98.4807	94.711	95.7516	95.852	94.9142	97.2899	97.2425	90.2258	97.2335	96.8393	98.3741	96.2591	97.0799	96.7298	96.8927	96.6602	98.0763	97.0175	97.527	95.5731	98.5484	95.9011	98.5066	98.5022	98.6629	96.9437
3129.1	98.5589	98.7683	98.8327	97.8455	98.5366	98.5367	95.3091	94.7083	94.221	92.6187	92.7757	93.0501	94.219	94.6641	94.8308	97.1609	95.928	95.6394	95.2297	93.7021	96.6069	98.447	98.7164	98.5045	94.7237	95.7201	95.9295	94.9191	97.3094	97.1839	90.2607	97.2861	96.7561	98.3763	96.2246	97.1568	96.7435	96.9733	96.6534	98.0398	97.0169	97.5527	95.5793	98.5089	95.9633	98.4131	98.5107	98.6359	96.9519
3127.24	98.678	98.7867	98.8207	97.8652	98.5462	98.534	95.3484	94.6947	94.2759	92.6642	92.8507	93.1173	94.2488	94.7461	94.9412	97.1981	95.8913	95.7119	95.2945	93.7386	96.629	98.4612	98.7065	98.5453	94.7413	95.8139	96.0122	94.9018	97.2975	97.2217	90.261	97.2909	96.7192	98.4207	96.1815	97.1927	96.8224	97.0362	96.7141	98.0739	97.0164	97.5607	95.5667	98.4319	96.0207	98.3472	98.5202	98.5769	96.9148
3125.37	98.7746	98.7978	98.828	97.9078	98.5332	98.5709	95.4214	94.7165	94.3582	92.7118	92.9562	93.2078	94.3136	94.8113	95.0003	97.2884	95.9136	95.7761	95.3763	93.8064	96.6378	98.5027	98.7007	98.606	94.7697	95.9042	96.0701	94.9492	97.2907	97.3021	90.2509	97.2668	96.7722	98.4866	96.2194	97.195	96.8913	97.02	96.7836	98.0713	97.0045	97.5567	95.6187	98.4189	96.0594	98.4126	98.5611	98.6093	96.9245
3123.51	98.7673	98.8198	98.9018	97.9176	98.5167	98.6427	95.4993	94.8265	94.4103	92.764	93.0195	93.2507	94.3469	94.8236	94.9587	97.3631	96.0037	95.8017	95.3987	93.8664	96.6465	98.5295	98.6725	98.6119	94.858	95.8904	96.0568	94.9539	97.3203	97.2747	90.2776	97.291	96.8339	98.5122	96.2951	97.1811	96.9058	97.022	96.7947	98.0823	97.0071	97.5561	95.7334	98.475	96.0942	98.489	98.6376	98.7113	96.9687
3121.64	98.7185	98.8325	98.9752	97.9267	98.548	98.637	95.4703	94.8658	94.4398	92.7755	93.0148	93.2506	94.3875	94.8382	94.9481	97.2897	96.0393	95.8333	95.4097	93.9215	96.6407	98.5171	98.6328	98.5587	94.894	95.8803	96.0104	94.9663	97.3247	97.2417	90.2554	97.3376	96.9027	98.462	96.2712	97.1826	96.8632	97.0629	96.7841	98.1601	97.004	97.6092	95.7818	98.5433	96.0817	98.5081	98.6429	98.719	96.9849
3119.78	98.6838	98.7999	98.9532	97.9026	98.5349	98.6346	95.4489	94.8333	94.4598	92.748	93.0259	93.236	94.4236	94.8404	95.0005	97.2651	96.006	95.8475	95.3607	93.9612	96.6439	98.5471	98.6509	98.5593	94.8775	95.91	96.0066	95.0405	97.2869	97.2188	90.2586	97.3555	96.9418	98.4542	96.2228	97.1783	96.8337	97.054	96.7455	98.1977	97.0181	97.6673	95.755	98.5426	96.0345	98.4557	98.6282	98.7102	96.9923
3117.92	98.7064	98.797	98.9464	97.8423	98.4958	98.6198	95.4624	94.8315	94.4125	92.681	92.9582	93.2131	94.4158	94.8266	95.0057	97.3026	96.0035	95.7725	95.3082	93.8969	96.6212	98.5971	98.6779	98.5371	94.8967	95.9795	96.0176	95.0309	97.2825	97.2007	90.3168	97.3331	96.9349	98.4649	96.2562	97.1786	96.8676	96.994	96.7224	98.0995	97.0917	97.6535	95.7699	98.4708	96.0404	98.4277	98.6502	98.7257	97.0155
3116.05	98.705	98.838	98.9466	97.8053	98.4882	98.6176	95.4533	94.8869	94.444	92.625	92.8987	93.2189	94.3645	94.8453	94.9689	97.3295	96.0042	95.7373	95.3873	93.8406	96.6324	98.5438	98.7142	98.4866	94.8694	95.9994	96.0082	94.9737	97.3112	97.2929	90.311	97.2767	96.9168	98.4534	96.3265	97.2342	96.8763	96.9921	96.7556	97.9872	97.1057	97.6229	95.8254	98.4483	96.0658	98.5126	98.6185	98.7219	96.9367
3114.19	98.6998	98.8675	98.9332	97.8526	98.4769	98.6777	95.5018	94.9231	94.5161	92.65	92.9224	93.1945	94.3639	94.8786	94.9938	97.3202	96.0009	95.7989	95.4202	93.8812	96.6817	98.4908	98.7587	98.5496	94.833	95.9771	96.0317	95.0047	97.3199	97.3337	90.2786	97.2896	96.9529	98.4857	96.3187	97.2357	96.8312	97.0075	96.7407	98.0022	97.0925	97.61	95.838	98.4576	96.1042	98.5638	98.5633	98.6555	96.9442
3112.33	98.7268	98.8622	98.93	97.9015	98.5074	98.6468	95.5992	94.9459	94.5494	92.6138	92.9304	93.1629	94.4353	94.8607	95.0539	97.3027	96.0257	95.8094	95.4213	93.9075	96.6769	98.4882	98.7629	98.6035	94.9248	95.9938	96.0726	95.074	97.3171	97.2871	90.268	97.3396	96.9956	98.4954	96.279	97.2161	96.7965	97.0045	96.7007	98.0877	97.0862	97.6112	95.8089	98.4506	96.1252	98.5323	98.6428	98.6332	97.0305
3110.46	98.7539	98.8697	98.9256	97.903	98.5912	98.5734	95.5904	94.9634	94.5451	92.5329	92.8899	93.1106	94.453	94.8403	95.088	97.2665	96.0954	95.7826	95.438	93.9053	96.6798	98.529	98.7467	98.5692	94.9943	96.0282	96.1074	95.0772	97.342	97.2927	90.2809	97.3481	96.9853	98.4952	96.2571	97.2068	96.829	96.9895	96.6836	98.128	97.0468	97.5794	95.8053	98.4566	96.1224	98.5023	98.7146	98.7076	97.0293
3108.6	98.8027	98.9222	98.9635	97.8929	98.6259	98.564	95.5373	94.9882	94.5447	92.5082	92.8694	93.0817	94.4269	94.8709	95.0733	97.2713	96.1476	95.8041	95.4568	93.8896	96.7289	98.5235	98.7292	98.5578	95.0028	96.0217	96.1617	95.0194	97.3369	97.32	90.2716	97.3294	96.941	98.4787	96.2228	97.1818	96.8869	97.0208	96.7098	98.1217	96.9644	97.5585	95.8315	98.4695	96.1636	98.4895	98.6607	98.7025	96.9979
3106.74	98.7717	98.934	98.9858	97.8836	98.6702	98.563	95.5174	95.0237	94.5929	92.5086	92.8799	93.0863	94.4218	94.8886	95.0301	97.3133	96.1047	95.8681	95.4673	93.8791	96.7321	98.4928	98.7148	98.5837	95.011	95.9789	96.1853	94.9882	97.2775	97.3488	90.2342	97.3153	96.8795	98.4344	96.241	97.1881	96.8739	97.076	96.7593	98.103	96.916	97.5644	95.8529	98.512	96.1754	98.4971	98.6481	98.659	97.0093
3104.87	98.7105	98.8908	98.9316	97.9088	98.6557	98.5953	95.5478	94.9943	94.6203	92.5365	92.8875	93.1132	94.4426	94.8842	95.081	97.3099	96.0883	95.9034	95.532	93.9916	96.7356	98.5123	98.7115	98.6102	95.059	95.9967	96.1629	95.0289	97.3006	97.3393	90.264	97.323	96.8199	98.4389	96.3535	97.2172	96.7597	97.0413	96.7757	98.0944	96.9514	97.5518	95.86	98.5825	96.1555	98.5274	98.669	98.6449	97.0435
3103.01	98.7162	98.862	98.9081	97.914	98.5946	98.6315	95.5796	94.9721	94.602	92.5655	92.9177	93.1123	94.4498	94.9138	95.1252	97.3438	96.1232	95.8599	95.5447	94.0363	96.7029	98.5148	98.7557	98.6078	95.0705	96.0445	96.1235	95.0345	97.3734	97.2806	90.3456	97.3592	96.8477	98.4835	96.4033	97.2391	96.7634	97.0079	96.769	98.0431	96.9751	97.5398	95.879	98.6084	96.189	98.5463	98.6809	98.6223	97.0413
3101.14	98.7255	98.8324	98.9788	97.8858	98.5912	98.6233	95.5931	95.0001	94.6498	92.5327	92.9104	93.1289	94.4833	94.9482	95.0812	97.4039	96.0946	95.8638	95.5075	93.9542	96.6529	98.5226	98.8019	98.5828	95.0707	96.0576	96.1131	95.0188	97.3704	97.239	90.3569	97.3624	96.9534	98.5169	96.3291	97.2569	96.8088	97.0378	96.7814	98.0159	96.9739	97.5202	95.8859	98.5779	96.2475	98.5515	98.6952	98.6145	97.0134
3099.28	98.7604	98.8309	99.046	97.8393	98.6075	98.6161	95.6245	95.0258	94.6836	92.4762	92.9228	93.1472	94.5572	94.926	95.0851	97.4071	96.0561	95.9033	95.5174	93.952	96.6549	98.528	98.7931	98.5948	95.0735	96.0457	96.1905	95.1009	97.3652	97.273	90.3157	97.332	96.9785	98.5208	96.298	97.2466	96.7923	97.0562	96.7231	98.1031	96.9721	97.5253	95.8919	98.558	96.236	98.5196	98.6671	98.6894	97.016
3097.42	98.7733	98.8487	99.0347	97.8328	98.5907	98.6502	95.6712	95.0501	94.7212	92.4695	92.9351	93.0885	94.5811	94.9506	95.1066	97.3908	96.0837	95.9479	95.5394	93.9471	96.7039	98.4909	98.7537	98.6226	95.0926	96.0388	96.2223	95.1586	97.3942	97.3157	90.311	97.3452	96.9298	98.5238	96.3661	97.243	96.8321	97.018	96.6515	98.1316	96.9943	97.5439	95.9116	98.5472	96.2384	98.5125	98.6635	98.7222	97.0828
3095.55	98.8233	98.8632	98.9797	97.8779	98.5677	98.6877	95.675	95.1	94.7065	92.4643	92.876	93.0481	94.5513	94.9936	95.1156	97.3715	96.156	96.0038	95.5402	93.987	96.7556	98.4861	98.7366	98.6437	95.1419	96.0612	96.2264	95.161	97.4008	97.3498	90.3458	97.3867	96.9451	98.5382	96.3927	97.2868	96.8776	96.9568	96.6787	98.049	97.0529	97.5459	95.9156	98.5775	96.2699	98.5542	98.6583	98.7434	97.0835
3093.69	98.831	98.8743	98.9519	97.9257	98.6206	98.6693	95.6683	95.1315	94.7133	92.4235	92.8235	93.0576	94.5331	95.0149	95.1562	97.4046	96.22	96.0392	95.5297	94.0336	96.8292	98.4991	98.7733	98.6371	95.1582	96.0935	96.2388	95.1851	97.3784	97.3722	90.354	97.3768	96.9886	98.4926	96.403	97.2992	96.8774	96.9365	96.7192	97.9789	97.0627	97.5181	95.9284	98.5678	96.2606	98.5794	98.6339	98.7307	97.045
3091.83	98.7779	98.8681	98.9876	97.9329	98.6639	98.6686	95.7	95.1017	94.7718	92.3173	92.7604	93.0031	94.5409	95.0458	95.1947	97.4001	96.2529	96.0416	95.5413	94.019	96.8057	98.4967	98.8098	98.623	95.1275	96.083	96.2308	95.1851	97.4189	97.3621	90.3446	97.4064	96.9644	98.4536	96.4033	97.2505	96.8413	96.9495	96.7023	97.9767	97.0046	97.4855	95.9739	98.5133	96.2635	98.581	98.6347	98.6842	97.0804
3089.96	98.7301	98.8603	99.0181	97.9272	98.6367	98.6725	95.7636	95.1249	94.8172	92.1938	92.6495	92.8875	94.5678	95.0106	95.2038	97.3636	96.2256	96.0349	95.5424	94.0768	96.7579	98.5643	98.7944	98.6245	95.1391	96.084	96.2308	95.1726	97.4666	97.3589	90.3752	97.3898	96.958	98.4772	96.3799	97.1982	96.7608	97.0035	96.6875	98.0555	96.9934	97.469	95.9713	98.514	96.2938	98.544	98.6624	98.7308	97.0952
3088.1	98.741	98.865	99.0001	97.9484	98.6047	98.6677	95.7483	95.1879	94.8204	92.1396	92.5631	92.7951	94.5601	94.9274	95.1784	97.4014	96.2046	96.0097	95.5473	94.1072	96.7674	98.6235	98.8051	98.6032	95.1396	96.1127	96.18	95.2083	97.4727	97.3535	90.3954	97.3224	96.9956	98.4791	96.3503	97.2197	96.7606	97.0508	96.7031	98.0763	97.0261	97.4841	95.9682	98.5726	96.2934	98.5251	98.6844	98.7414	97.0915
3086.24	98.7485	98.8572	98.9733	97.9195	98.6094	98.6659	95.7261	95.1973	94.827	92.0781	92.4914	92.754	94.5631	94.938	95.1674	97.4013	96.195	96.0496	95.561	94.0563	96.8243	98.5907	98.8324	98.5998	95.1349	96.1294	96.1875	95.2303	97.4415	97.3621	90.3464	97.3353	96.9837	98.4977	96.3072	97.3287	96.8376	97.023	96.7185	98.0461	97.0071	97.4685	95.9733	98.5982	96.279	98.564	98.6811	98.7446	97.1217
3084.37	98.7146	98.8514	98.942	97.9011	98.5992	98.6751	95.7717	95.1423	94.8509	92.0604	92.4702	92.8122	94.5962	95.0217	95.2033	97.3623	96.1706	96.077	95.5531	94.0502	96.8281	98.567	98.8373	98.6801	95.2061	96.1222	96.2451	95.2049	97.4044	97.3923	90.3338	97.3605	96.9801	98.5185	96.328	97.3949	96.8595	96.9932	96.7171	98.0352	96.9986	97.427	95.9622	98.5729	96.3284	98.5448	98.7094	98.7538	97.1243
3082.51	98.6935	98.8964	98.9244	97.9014	98.6061	98.6782	95.7965	95.1589	94.8697	92.1242	92.5933	92.8493	94.6403	95.0532	95.2331	97.4006	96.1679	96.0527	95.5975	94.1306	96.8337	98.5645	98.8049	98.6788	95.252	96.141	96.2492	95.2155	97.4075	97.397	90.396	97.3748	96.9776	98.5001	96.3999	97.3389	96.8292	97.06	96.722	97.9832	97.0077	97.4438	95.9539	98.5489	96.3857	98.5671	98.6918	98.697	97.103
3080.64	98.6738	98.9383	98.9502	97.8912	98.648	98.684	95.7737	95.2394	94.8655	92.1702	92.6707	92.8423	94.629	95.0818	95.2356	97.4418	96.2122	96.0714	95.666	94.1108	96.8139	98.5767	98.7692	98.6618	95.2438	96.1643	96.2569	95.2337	97.4431	97.4047	90.4338	97.3761	96.9566	98.496	96.3838	97.2807	96.8034	97.124	96.7551	97.9778	96.9946	97.4513	95.9545	98.5791	96.3414	98.575	98.6447	98.7339	97.1203
3078.78	98.6741	98.9298	98.9573	97.8956	98.6514	98.6894	95.7706	95.2598	94.8465	92.1962	92.6441	92.8268	94.5758	95.1033	95.2015	97.4183	96.2305	96.0717	95.6487	94.0852	96.7848	98.5657	98.7786	98.7056	95.2696	96.2042	96.3281	95.1984	97.4303	97.4147	90.3729	97.3241	96.943	98.4902	96.3798	97.2559	96.8101	97.0608	96.7364	98.0096	96.9677	97.4454	95.9775	98.6154	96.3072	98.5527	98.6319	98.7595	97.1493
3076.92	98.7569	98.9039	98.9424	97.8794	98.6661	98.6819	95.8011	95.2927	94.8771	92.2166	92.6276	92.9104	94.5807	95.0734	95.2451	97.4065	96.1736	96.0316	95.6252	94.1192	96.792	98.5559	98.7874	98.6562	95.2927	96.2325	96.3401	95.1927	97.3884	97.4336	90.3033	97.3533	96.958	98.4739	96.44	97.2546	96.8481	96.9936	96.6925	97.9979	96.9374	97.4479	96.0404	98.6379	96.3372	98.5446	98.6296	98.7352	97.0856
3075.05	98.8074	98.8444	98.9395	97.8866	98.6841	98.6929	95.876	95.2773	94.9547	92.2567	92.7034	92.9818	94.6473	95.0841	95.2945	97.3946	96.1672	96.0185	95.6245	94.1346	96.8741	98.6161	98.7964	98.5956	95.2862	96.1882	96.3181	95.2742	97.4209	97.4322	90.3382	97.3899	96.9608	98.4773	96.4271	97.3109	96.8523	96.9791	96.7092	97.9734	96.9393	97.4411	96.0493	98.5902	96.3342	98.5349	98.6838	98.7402	97.0612
3073.19	98.7685	98.81	98.9201	97.9363	98.6896	98.7343	95.8677	95.2572	95.0014	92.246	92.7682	92.9668	94.6546	95.1302	95.2974	97.4443	96.196	96.075	95.6362	94.1121	96.9356	98.679	98.8403	98.6396	95.3294	96.1829	96.3175	95.3199	97.4587	97.4059	90.3968	97.3923	96.9241	98.4821	96.3824	97.3312	96.8211	96.9854	96.735	97.96	96.9732	97.4188	96.0479	98.547	96.3534	98.5138	98.7219	98.7407	97.0741
3071.33	98.7298	98.8851	98.9165	97.9244	98.6548	98.727	95.8072	95.2791	94.9872	92.1526	92.7205	92.9275	94.6488	95.1319	95.3133	97.4685	96.225	96.0944	95.7005	94.1463	96.8793	98.6228	98.8616	98.6596	95.4174	96.1776	96.3273	95.302	97.4409	97.4106	90.365	97.4399	96.9429	98.452	96.3885	97.2779	96.833	97.0323	96.7385	97.9671	96.976	97.4444	96.0896	98.5517	96.3846	98.5185	98.6811	98.7306	97.1107
3069.46	98.7307	98.9358	99.0141	97.9455	98.6247	98.6786	95.8498	95.3335	94.9917	92.0729	92.6381	92.8452	94.6638	95.0834	95.3138	97.4198	96.2962	96.0828	95.6864	94.1787	96.8423	98.5787	98.8188	98.6232	95.413	96.1708	96.3138	95.2725	97.4501	97.409	90.3371	97.4463	97.0001	98.4776	96.4016	97.2427	96.8634	97.053	96.7146	97.9584	97.0154	97.4871	96.0858	98.5491	96.4007	98.544	98.6865	98.7274	97.1645
3067.6	98.6847	98.88	99.0621	97.9502	98.6288	98.6442	95.8909	95.399	95.0062	92.0097	92.5099	92.7161	94.6929	95.0759	95.2817	97.4268	96.2756	96.0992	95.6406	94.1863	96.7911	98.6036	98.7987	98.6316	95.3213	96.2151	96.2789	95.2637	97.4797	97.3645	90.3525	97.3897	96.9576	98.5225	96.3544	97.263	96.8802	97.0138	96.6871	97.9304	97.045	97.4404	96.0786	98.5648	96.4071	98.5429	98.6836	98.7514	97.1621
3065.73	98.6587	98.8353	98.9548	97.8615	98.6346	98.6094	95.903	95.3615	94.9976	91.8655	92.3145	92.6096	94.6895	95.1257	95.2591	97.4736	96.223	96.0913	95.6725	94.2227	96.7865	98.57	98.8177	98.6585	95.2951	96.239	96.2777	95.2674	97.5052	97.339	90.3766	97.3841	96.8972	98.47	96.3307	97.3146	96.8671	97.0222	96.7254	97.9766	97.0123	97.4092	96.1387	98.6032	96.4107	98.5357	98.647	98.7789	97.1787
3063.87	98.6815	98.8548	98.9062	97.841	98.5984	98.6756	95.9257	95.2998	95.0224	91.7161	92.21	92.5256	94.6689	95.1838	95.2949	97.5396	96.2416	96.0981	95.689	94.256	96.8089	98.5241	98.8113	98.6723	95.334	96.2397	96.3476	95.2798	97.5065	97.3675	90.4293	97.4001	96.9443	98.4309	96.3893	97.2959	96.8444	97.0244	96.7492	98.0404	96.9886	97.4337	96.1499	98.6367	96.4186	98.5361	98.6533	98.787	97.1899
3062.01	98.742	98.8919	98.9241	97.9041	98.6032	98.7862	95.8975	95.3086	95.0423	91.6446	92.2224	92.4525	94.7149	95.2272	95.3479	97.4972	96.2729	96.1601	95.6888	94.2463	96.8517	98.5885	98.8677	98.688	95.3664	96.2629	96.3956	95.317	97.4561	97.4339	90.4594	97.4068	96.9999	98.443	96.4223	97.2057	96.8324	97.0026	96.7776	98.0557	97.0547	97.4336	96.1207	98.6679	96.4279	98.5484	98.6351	98.7787	97.1437
3060.14	98.7358	98.8775	98.9321	97.9423	98.6268	98.7796	95.8762	95.3507	95.049	91.6679	92.2235	92.4697	94.7448	95.2344	95.357	97.4149	96.2923	96.2217	95.7078	94.2728	96.8833	98.6654	98.9086	98.6973	95.3755	96.2849	96.3657	95.3345	97.4703	97.4689	90.3916	97.4242	96.9767	98.4303	96.4283	97.2222	96.8341	97.0197	96.7893	98.0336	97.1144	97.4449	96.0962	98.6447	96.428	98.5735	98.6345	98.7634	97.1516
3058.28	98.7087	98.8406	98.8884	97.9101	98.6682	98.7244	95.8743	95.3952	95.0948	91.7568	92.2528	92.5164	94.7215	95.1967	95.3161	97.4429	96.3212	96.177	95.7214	94.3507	96.8821	98.6565	98.9043	98.6932	95.3667	96.279	96.38	95.3715	97.52	97.4716	90.3732	97.425	96.9597	98.4499	96.4207	97.2893	96.8832	97.0592	96.7645	97.9869	97.0662	97.446	96.1029	98.5968	96.4047	98.5984	98.66	98.7378	97.1486
3056.42	98.7047	98.833	98.8682	97.902	98.7226	98.7124	95.8837	95.4439	95.1781	91.8147	92.3646	92.6258	94.76	95.1487	95.3017	97.4458	96.3585	96.138	95.7933	94.3916	96.8852	98.6079	98.9254	98.6925	95.3939	96.2442	96.3997	95.4499	97.4745	97.4793	90.4377	97.4282	96.9578	98.4972	96.3837	97.2742	96.9282	97.057	96.7803	97.9642	96.9873	97.4288	96.1763	98.6248	96.4186	98.6418	98.666	98.7265	97.0969
3054.55	98.6871	98.8134	98.9082	97.9337	98.7054	98.7228	95.9003	95.483	95.2046	91.8788	92.5357	92.7723	94.7944	95.1631	95.3744	97.4325	96.3885	96.1677	95.8132	94.3538	96.9254	98.5969	98.9044	98.6909	95.4237	96.2555	96.4123	95.4904	97.4386	97.4864	90.4707	97.4058	96.9444	98.5076	96.4074	97.254	96.9398	97.0481	96.7996	97.9954	96.9565	97.4147	96.1715	98.6203	96.4933	98.6394	98.6513	98.7293	97.1151
3052.69	98.6469	98.7835	98.9091	97.902	98.6899	98.7153	95.9316	95.5029	95.205	91.9883	92.6659	92.8123	94.7506	95.229	95.4245	97.4575	96.3477	96.182	95.8149	94.2961	96.9213	98.6101	98.8832	98.6617	95.4495	96.3185	96.3884	95.4771	97.4637	97.466	90.4725	97.3879	96.9613	98.5149	96.4594	97.269	96.912	97.0586	96.7879	98.0328	97.008	97.402	96.0926	98.5437	96.5031	98.5594	98.686	98.7108	97.1642
3050.83	98.679	98.768	98.9242	97.8873	98.7303	98.7233	95.9419	95.5303	95.2097	92.0846	92.7488	92.8744	94.787	95.2729	95.4228	97.5493	96.2988	96.2318	95.8609	94.3287	96.9147	98.6265	98.8805	98.6613	95.4817	96.3111	96.3935	95.4768	97.4937	97.455	90.4592	97.477	97.0039	98.4907	96.4562	97.2592	96.8717	97.0762	96.776	98.0137	97.079	97.4323	96.1103	98.5286	96.4712	98.5436	98.7608	98.7278	97.1539
3048.96	98.6686	98.8191	98.9549	97.9337	98.7072	98.7358	95.9475	95.538	95.2224	92.2141	92.8228	92.9901	94.8427	95.2718	95.385	97.6086	96.3214	96.2582	95.8756	94.3573	96.9148	98.6697	98.8606	98.6722	95.4945	96.2781	96.4738	95.4758	97.4858	97.4477	90.4592	97.529	97.0247	98.4873	96.4151	97.2627	96.8613	97.0683	96.7545	98.0064	97.083	97.463	96.1779	98.5486	96.4872	98.6081	98.7772	98.7618	97.1854
3047.1	98.6235	98.8932	98.9429	97.9787	98.6334	98.7572	95.9805	95.5352	95.2289	92.2993	92.8392	93.0558	94.8179	95.256	95.3798	97.6363	96.3742	96.1929	95.8413	94.3879	96.9439	98.679	98.8582	98.6917	95.5547	96.2918	96.4847	95.4706	97.494	97.4134	90.4586	97.4974	97.0013	98.4986	96.409	97.2718	96.9125	97.0653	96.7724	98.0483	97.0813	97.461	96.21	98.5824	96.5104	98.615	98.7243	98.7655	97.2094
3045.23	98.566	98.8563	98.8906	97.9788	98.6095	98.7825	96.0246	95.547	95.2498	92.3055	92.8421	93.105	94.8081	95.2537	95.3926	97.5774	96.3786	96.2189	95.8467	94.4363	96.9516	98.6117	98.856	98.7252	95.597	96.3196	96.45	95.5258	97.5113	97.4192	90.4459	97.4701	96.9345	98.4647	96.4028	97.2346	96.9181	97.1124	96.819	98.0512	97.0652	97.4364	96.1821	98.6342	96.5264	98.591	98.7222	98.7681	97.2181
3043.37	98.5509	98.7789	98.8621	98.0203	98.6456	98.7533	96.0146	95.5486	95.2566	92.2653	92.8524	93.076	94.798	95.2493	95.3437	97.4954	96.3515	96.2759	95.8398	94.4555	96.9399	98.6162	98.8687	98.725	95.5372	96.3146	96.4937	95.5377	97.517	97.4481	90.4371	97.4678	96.9315	98.4528	96.3663	97.2051	96.8765	97.0965	96.7617	97.9896	97.0262	97.3901	96.1604	98.6801	96.5361	98.552	98.7041	98.7465	97.2204
3041.51	98.562	98.7398	98.8612	98.0339	98.7078	98.7131	96.0039	95.5426	95.2638	92.1316	92.7982	93.0005	94.7924	95.2676	95.3173	97.5018	96.356	96.2522	95.8127	94.4333	96.9668	98.6478	98.9204	98.6881	95.4711	96.3219	96.5354	95.4855	97.529	97.4667	90.4295	97.4432	96.9651	98.4636	96.3527	97.2045	96.8561	97.0408	96.7352	97.9186	96.9853	97.3567	96.1756	98.6708	96.5206	98.5124	98.644	98.7009	97.2466
3039.64	98.5979	98.7239	98.8405	97.9819	98.7253	98.7403	95.9914	95.5248	95.267	92.0034	92.6828	92.953	94.8473	95.3165	95.3977	97.54	96.3758	96.2644	95.8787	94.4484	96.9969	98.6331	98.9539	98.6927	95.5336	96.3549	96.4967	95.4916	97.5516	97.4706	90.4395	97.4722	96.9681	98.4738	96.356	97.2459	96.8763	97.0097	96.7753	97.927	96.9628	97.3316	96.2093	98.6334	96.5457	98.5316	98.6603	98.6877	97.26
3037.78	98.6344	98.728	98.8323	97.9524	98.6879	98.7678	96.0386	95.5641	95.2881	91.8949	92.5566	92.8293	94.8403	95.3195	95.4613	97.5522	96.3809	96.2974	95.9313	94.4742	96.997	98.6206	98.9243	98.7023	95.5927	96.3595	96.5005	95.5419	97.554	97.4496	90.4424	97.5188	96.9903	98.474	96.3388	97.2605	96.8742	97.0083	96.759	97.9493	97.0215	97.3231	96.2668	98.6427	96.5743	98.5646	98.7404	98.7521	97.2686
3035.92	98.6121	98.7585	98.8034	97.9649	98.6732	98.7631	96.0749	95.6172	95.3132	91.6979	92.4025	92.5936	94.7763	95.3008	95.4643	97.519	96.3433	96.2686	95.9123	94.4677	96.9569	98.6427	98.9173	98.6442	95.567	96.3013	96.5247	95.5412	97.538	97.4777	90.4485	97.4937	96.9832	98.4663	96.3087	97.2692	96.8806	97.0593	96.7514	97.9279	97.0576	97.3159	96.3304	98.6558	96.5236	98.5588	98.745	98.757	97.2603
3034.05	98.561	98.7567	98.772	97.9577	98.6721	98.7339	96.0918	95.6399	95.3349	91.4485	92.1755	92.3674	94.7822	95.3471	95.4783	97.51	96.3755	96.2827	95.8821	94.5207	96.9553	98.6709	98.9172	98.6266	95.5779	96.2729	96.4887	95.5451	97.5274	97.4856	90.4383	97.4258	96.936	98.4632	96.2899	97.2559	96.9102	97.0763	96.7795	97.9184	97.0204	97.3504	96.3026	98.6534	96.5099	98.5651	98.7033	98.675	97.2939
3032.19	98.5559	98.6889	98.8217	97.9589	98.6512	98.7058	96.1	95.6587	95.3555	91.2019	91.9149	92.1228	94.83	95.3763	95.4946	97.5221	96.4535	96.2921	95.9078	94.5249	96.9808	98.6436	98.8998	98.6897	95.6544	96.3117	96.4764	95.612	97.529	97.5017	90.4231	97.3783	96.9685	98.4141	96.3077	97.1833	96.9012	97.073	96.7734	97.9457	97.0353	97.3813	96.2476	98.6692	96.5573	98.6049	98.7036	98.6869	97.2828
3030.33	98.5588	98.673	98.8572	97.9894	98.6808	98.7453	96.081	95.6687	95.3694	90.985	91.6731	91.9183	94.8045	95.3392	95.4518	97.5573	96.4683	96.3104	95.9615	94.5174	96.9746	98.6206	98.908	98.7157	95.7133	96.3568	96.5044	95.6423	97.5623	97.5426	90.4261	97.3737	96.9835	98.3858	96.3285	97.1523	96.8884	97.0974	96.7827	97.951	97.0983	97.3777	96.2394	98.7127	96.5683	98.6194	98.6753	98.7679	97.2407
3028.46	98.4864	98.6797	98.8155	98.0347	98.7127	98.774	96.0946	95.6532	95.3788	90.8025	91.465	91.7928	94.7703	95.3279	95.4125	97.5637	96.4303	96.3482	95.9604	94.5553	97.0215	98.6306	98.9408	98.6941	95.6758	96.3893	96.5032	95.657	97.601	97.4809	90.4218	97.4151	96.9486	98.3947	96.3516	97.1845	96.8795	97.1302	96.8274	97.9324	97.0982	97.396	96.2484	98.7117	96.5783	98.6072	98.6582	98.7832	97.2123
3026.6	98.4146	98.6342	98.7378	98.0606	98.7116	98.7656	96.117	95.6554	95.3822	90.6999	91.4396	91.81	94.7827	95.2889	95.4083	97.5478	96.4224	96.3316	95.9536	94.5743	97.0311	98.6301	98.973	98.67	95.6427	96.394	96.4855	95.6684	97.6064	97.3897	90.3998	97.466	96.972	98.4498	96.3536	97.1658	96.8902	97.1687	96.8129	97.901	97.0901	97.4458	96.2575	98.7116	96.5914	98.5838	98.6954	98.7147	97.1961
3024.73	98.4892	98.6094	98.6686	98.0299	98.6935	98.7921	96.1294	95.6517	95.3511	90.8011	91.5963	91.9175	94.7433	95.2556	95.4183	97.5118	96.4764	96.2955	95.9711	94.5907	97.0019	98.6413	98.979	98.6489	95.6416	96.3448	96.4756	95.6099	97.5922	97.4539	90.3908	97.5021	96.9771	98.4349	96.3135	97.1632	96.9453	97.129	96.8005	97.927	97.0667	97.4149	96.2585	98.7277	96.5975	98.5648	98.7151	98.6955	97.2066
3022.87	98.563	98.61	98.6868	98.0093	98.6854	98.7986	96.0743	95.6187	95.3742	91.0517	91.8245	92.1236	94.7172	95.2595	95.3916	97.5011	96.4852	96.3298	96.006	94.589	97.0566	98.6227	98.955	98.611	95.6175	96.3084	96.4408	95.5517	97.5982	97.5869	90.404	97.4836	96.9336	98.3015	96.2964	97.1658	96.949	97.1174	96.8107	97.9652	97.0688	97.3727	96.2065	98.6669	96.5983	98.5819	98.7214	98.7744	97.2668
3021.01	98.4688	98.5896	98.7036	98.0306	98.665	98.7798	96.0459	95.6105	95.4254	91.2638	92.0941	92.3959	94.7169	95.2746	95.3479	97.5235	96.4482	96.359	95.987	94.6181	97.0659	98.6166	98.9448	98.6287	95.5995	96.3131	96.4394	95.6145	97.6081	97.6135	90.3858	97.4782	96.8875	98.2694	96.3322	97.0893	96.9268	97.1404	96.81	97.9578	97.1072	97.4009	96.167	98.6114	96.5248	98.5688	98.6566	98.7373	97.324
3019.14	98.3358	98.4861	98.63	98.0395	98.5892	98.7485	96.0726	95.683	95.434	91.4287	92.3535	92.6036	94.6808	95.3049	95.3525	97.5206	96.403	96.3611	95.9787	94.6656	97.0493	98.6359	98.9204	98.6569	95.6172	96.3212	96.4137	95.6671	97.5861	97.5578	90.3322	97.4832	96.8082	98.296	96.3318	97.0219	96.965	97.126	96.84	97.9651	97.118	97.4216	96.1891	98.6344	96.446	98.5192	98.6034	98.6651	97.2847
3017.28	98.2554	98.3766	98.5564	98.0377	98.5693	98.7441	96.0506	95.7298	95.3876	91.5909	92.502	92.7502	94.6704	95.2852	95.3492	97.5087	96.3564	96.2934	95.993	94.628	97.0286	98.6419	98.9004	98.6459	95.6257	96.2793	96.3366	95.6344	97.5846	97.5327	90.2931	97.4664	96.7624	98.2836	96.2769	97.0126	96.9795	97.167	96.8719	97.9945	97.1259	97.3928	96.2209	98.6856	96.4715	98.4681	98.5851	98.6908	97.2183
3015.42	98.239	98.3422	98.4933	98.0417	98.641	98.7914	96.0112	95.7008	95.3597	91.7022	92.5865	92.8119	94.6421	95.1954	95.2923	97.5248	96.3834	96.2661	95.9883	94.5919	97.0249	98.6228	98.8726	98.6174	95.5987	96.2454	96.3285	95.6342	97.5596	97.5136	90.285	97.4244	96.7721	98.2478	96.2327	96.988	96.9377	97.1769	96.9068	98.0387	97.1057	97.3735	96.1974	98.7171	96.52	98.4355	98.5748	98.6656	97.2004
3013.55	98.168	98.3018	98.4202	98.0457	98.6463	98.8172	96.0108	95.5848	95.3555	91.7409	92.649	92.8482	94.5937	95.0914	95.2614	97.522	96.406	96.3019	95.9819	94.579	97.059	98.5839	98.8408	98.5669	95.5976	96.2282	96.3763	95.6293	97.5221	97.4751	90.2602	97.3509	96.7337	98.1476	96.1552	96.9161	96.9426	97.1406	96.9009	98.0808	97.0873	97.3155	96.1154	98.7041	96.4669	98.4414	98.5712	98.615	97.1709
3011.69	98.0876	98.2164	98.3363	98.0187	98.584	98.7624	95.9695	95.5387	95.3638	91.7233	92.6708	92.9351	94.5682	95.0714	95.2518	97.4813	96.3784	96.2684	95.9895	94.534	97.0562	98.5458	98.8548	98.5306	95.5562	96.174	96.3026	95.583	97.4946	97.4673	90.1686	97.3004	96.6456	98.1127	96.0588	96.8771	97.0125	97.1444	96.8578	98.0419	97.0673	97.2686	96.067	98.6286	96.3506	98.4431	98.5517	98.6016	97.1725
3009.82	98.0403	98.157	98.2215	97.9806	98.5693	98.7297	95.9685	95.5483	95.3528	91.6322	92.5804	92.9351	94.5071	95.0608	95.1893	97.447	96.3171	96.2326	95.9564	94.5196	97.0096	98.5357	98.8673	98.4833	95.4771	96.1446	96.204	95.519	97.5228	97.4731	90.0677	97.322	96.5936	98.1188	96.0096	96.8273	97.0782	97.1539	96.8329	97.9822	97.0606	97.2644	96.066	98.5855	96.3012	98.4358	98.5125	98.5797	97.1898
3007.96	97.997	98.0988	98.1372	98.0096	98.5921	98.7285	95.9912	95.5669	95.3321	91.4984	92.4507	92.8204	94.4251	94.9847	95.1033	97.4118	96.2692	96.2473	95.9314	94.605	97.0037	98.528	98.8809	98.4388	95.4194	96.108	96.1705	95.4674	97.5653	97.4518	89.9753	97.3154	96.5503	98.0639	96.0341	96.7279	97.0493	97.1345	96.821	97.9608	97.0888	97.2809	96.0475	98.5751	96.2866	98.4037	98.4447	98.5399	97.1669
3006.1	97.9126	97.9968	98.0877	98.0187	98.5921	98.6894	95.9154	95.5232	95.2819	91.4126	92.3713	92.704	94.318	94.8832	95.0322	97.398	96.2519	96.2212	95.9436	94.6053	97.0059	98.4921	98.8964	98.4345	95.3998	95.9877	96.14	95.4787	97.5317	97.3858	89.9031	97.283	96.4885	98.0156	96.0182	96.6534	97.0186	97.1321	96.8391	98.0277	97.0905	97.3005	95.9987	98.5784	96.2234	98.3992	98.3794	98.4895	97.1129
3004.23	97.7742	97.8783	98.0266	98.0117	98.5389	98.6831	95.8914	95.4561	95.2288	91.3222	92.3005	92.6322	94.2014	94.8341	94.949	97.355	96.198	96.1621	95.9116	94.5429	97.018	98.4471	98.8735	98.4158	95.4221	95.9267	96.0848	95.5318	97.5349	97.3202	89.8374	97.2787	96.4373	97.9186	95.9223	96.6088	97.0235	97.1677	96.8688	98.039	97.0776	97.3381	95.9407	98.5943	96.1966	98.3961	98.3733	98.4462	97.0568
3002.37	97.6756	97.7595	97.8952	98.0511	98.4828	98.689	95.8912	95.3935	95.1954	91.2198	92.1855	92.5389	94.1589	94.7301	94.8903	97.2845	96.1711	96.1151	95.8825	94.4866	97.0266	98.4375	98.8373	98.3942	95.4097	95.8609	95.9983	95.5387	97.5665	97.3115	89.7365	97.2435	96.3998	97.8143	95.8034	96.5178	97.0199	97.1979	96.842	97.9665	97.1243	97.3348	95.8452	98.5861	96.1685	98.3159	98.3946	98.4283	97.0602
3000.51	97.5491	97.6107	97.759	98.0114	98.4413	98.6561	95.7866	95.3399	95.1722	91.1058	92.0782	92.4172	94.1046	94.5879	94.8312	97.2287	96.1482	96.0687	95.857	94.4495	96.9975	98.4579	98.8213	98.3417	95.3058	95.7294	95.9265	95.4572	97.4629	97.3004	89.5774	97.153	96.3115	97.7508	95.6984	96.415	96.9841	97.1861	96.8563	97.9305	97.1212	97.2678	95.762	98.5681	96.0671	98.2441	98.3606	98.3848	97.03
2998.64	97.3889	97.4494	97.6248	97.9451	98.3785	98.6171	95.7224	95.2714	95.0921	91.0075	91.9903	92.3192	93.9881	94.5309	94.7079	97.1492	96.0757	96.0095	95.8279	94.4179	96.9203	98.4326	98.8179	98.2621	95.2096	95.6419	95.8235	95.3637	97.3641	97.2883	89.4712	97.0845	96.1859	97.6702	95.6345	96.3091	97.0062	97.1469	96.8921	97.9279	97.0433	97.2297	95.6835	98.5496	95.961	98.1576	98.3003	98.2469	96.9378
2996.78	97.2434	97.2664	97.4046	97.9609	98.3024	98.5855	95.6272	95.1837	94.9591	90.9714	91.8956	92.2066	93.906	94.4469	94.5561	97.0884	95.9847	95.9454	95.7948	94.3791	96.8505	98.3318	98.7574	98.1894	95.1005	95.5674	95.6679	95.315	97.3862	97.2377	89.3558	97.0128	96.0648	97.5476	95.5528	96.1457	97.0254	97.1361	96.8856	97.9245	97.0036	97.2518	95.5212	98.4732	95.8393	98.0488	98.2044	98.0899	96.8431
2994.92	97.0179	97.0439	97.1385	98.0385	98.2388	98.5454	95.4613	95.0917	94.8661	90.8855	91.7385	92.0292	93.773	94.2863	94.4246	97.01	95.882	95.8504	95.6464	94.2885	96.8178	98.2447	98.6596	98.1108	94.9429	95.4203	95.4863	95.2394	97.3658	97.1438	89.1308	96.9369	95.955	97.345	95.3598	95.9437	96.9785	97.1248	96.8534	97.9114	97.039	97.251	95.3528	98.4105	95.6919	97.9768	98.0563	97.9916	96.7304
2993.05	96.751	96.7952	96.9045	98.0324	98.1551	98.4752	95.3046	94.9367	94.7881	90.708	91.5289	91.8861	93.5722	94.1111	94.2783	96.8761	95.8007	95.7458	95.5079	94.188	96.8105	98.1545	98.5841	98.0307	94.7862	95.2238	95.3052	95.0917	97.2742	97.0808	88.9309	96.8726	95.7628	97.1467	95.1473	95.7101	97.0056	97.136	96.7881	97.8739	97.0383	97.2246	95.2127	98.4183	95.5343	97.8547	97.9642	97.9382	96.6359
2991.19	96.4483	96.4411	96.6146	97.9904	98.0769	98.4072	95.1547	94.7546	94.6537	90.5479	91.2913	91.7372	93.4118	93.9168	94.0883	96.7422	95.656	95.6399	95.4449	94.0958	96.7797	98.038	98.504	97.8889	94.629	95.0075	95.0876	94.9569	97.1823	96.974	88.7427	96.7621	95.529	96.965	94.9213	95.4654	97.0464	97.1597	96.7598	97.8674	96.9528	97.2422	95.0065	98.4289	95.361	97.7152	97.9156	97.8443	96.5722
2989.32	96.0948	95.9998	96.2396	97.9909	97.9906	98.3605	95.0327	94.6014	94.4243	90.4813	91.0224	91.5015	93.2364	93.6894	93.8847	96.6254	95.4868	95.4855	95.316	93.9893	96.6715	97.9446	98.4292	97.6761	94.4501	94.7573	94.8109	94.8045	97.0419	96.8294	88.5064	96.5887	95.3106	96.7792	94.6092	95.223	97.0229	97.1344	96.7976	97.879	96.9503	97.2233	94.7738	98.3634	95.1278	97.5723	97.7525	97.7058	96.4351
2987.46	95.6697	95.5478	95.7796	97.9901	97.8432	98.3071	94.7828	94.3513	94.1489	90.5015	90.7474	91.247	92.9887	93.4306	93.6456	96.4484	95.3131	95.2542	95.1436	93.8036	96.5463	97.857	98.3764	97.4785	94.2182	94.4113	94.4926	94.5715	96.8638	96.7113	88.2316	96.3849	94.9971	96.5061	94.2847	94.9331	96.9945	97.1273	96.8053	97.8542	96.9723	97.1867	94.5174	98.2873	94.8461	97.402	97.5132	97.4873	96.2417
2985.6	95.1378	95.0004	95.2044	97.9752	97.6278	98.1929	94.4115	94.0236	93.8395	90.4955	90.4607	91.0479	92.7132	93.142	93.3603	96.2144	95.0637	95.0028	94.9554	93.6033	96.4511	97.6816	98.2513	97.2343	93.8538	94.0142	94.1158	94.3142	96.7	96.5336	87.8626	96.1262	94.6097	96.1344	93.9574	94.5344	96.988	97.1741	96.8199	97.7898	96.9201	97.1452	94.1656	98.2106	94.5251	97.201	97.2581	97.1988	96.0112
2983.73	94.4702	94.279	94.5195	97.9042	97.3754	98.0356	94.0357	93.6294	93.5179	90.3538	90.1004	90.7536	92.4174	92.8228	93.0001	95.9293	94.7262	94.6909	94.7742	93.3677	96.3132	97.4395	98.0659	96.9169	93.4537	93.5508	93.5832	94.0323	96.5066	96.2716	87.4118	95.8355	94.1653	95.6863	93.4532	94.0079	97.0024	97.1487	96.7823	97.6803	96.9061	97.1359	93.7567	98.0897	94.092	96.9098	96.9797	96.8996	95.6787
2981.87	93.6559	93.4332	93.6677	97.7964	97.1096	97.8793	93.5782	93.1276	93.0902	90.1405	89.6588	90.3221	92.0558	92.3987	92.5475	95.5607	94.336	94.3052	94.5048	93.0504	96.1646	97.1752	97.8524	96.5339	92.9934	92.9401	92.9374	93.6418	96.2233	95.953	86.8516	95.5122	93.6049	95.166	92.7901	93.3327	96.968	97.1318	96.6947	97.6414	96.8517	97.064	93.199	97.9624	93.5366	96.4915	96.6427	96.5156	95.3194
2980.01	92.6566	92.3721	92.5901	97.6845	96.8025	97.6986	92.8988	92.5473	92.4802	89.9004	89.1169	89.8795	91.5765	91.8546	92.0315	95.1108	93.8706	93.8088	94.105	92.6713	95.9557	96.8811	97.5968	96.0552	92.3417	92.178	92.1974	93.1371	95.8533	95.5746	86.1654	95.0873	92.9257	94.4798	92.008	92.5795	96.9126	97.1214	96.678	97.6612	96.7703	96.9516	92.4545	97.7595	92.8911	96.0249	96.2191	96.0418	94.9167
2978.14	91.4047	90.9549	91.2258	97.5062	96.3746	97.4252	92.0825	91.7813	91.7677	89.544	88.4565	89.3638	90.9635	91.2157	91.3758	94.5776	93.2832	93.1759	93.6735	92.2113	95.7017	96.5139	97.344	95.4958	91.5323	91.2421	91.2697	92.4538	95.3521	95.0328	85.3321	94.4888	92.0612	93.607	90.9692	91.6354	96.9039	97.0581	96.7041	97.6298	96.724	96.8522	91.6066	97.4809	92.0298	95.4807	95.6668	95.4984	94.3781
2976.28	89.8191	89.2205	89.4788	97.1751	95.8697	97.0409	91.0793	90.7081	90.8422	88.97	87.6853	88.7341	90.2341	90.3701	90.5349	93.8831	92.6198	92.4239	93.1196	91.6103	95.3465	96.0468	97.0274	94.8354	90.5207	90.0506	90.0344	91.6306	94.7836	94.3182	84.2513	93.8139	90.9192	92.5956	89.6899	90.3729	96.8463	96.9801	96.6512	97.5211	96.6901	96.7521	90.5656	97.1872	90.9711	94.8086	95.0132	94.8132	93.685
2974.41	87.7806	87.0448	87.3272	96.6706	95.2861	96.5977	89.8466	89.448	89.6418	88.1715	86.8192	88.0411	89.3106	89.2743	89.509	93.0179	91.7327	91.4676	92.42	90.881	94.8553	95.4837	96.5607	93.9868	89.2919	88.5668	88.4796	90.6118	94.1015	93.4943	82.8521	93.0061	89.5385	91.3299	88.1137	88.7638	96.7916	96.9034	96.5957	97.4322	96.6493	96.631	89.1755	96.8133	89.6463	93.9993	94.2035	93.9593	92.7769
2972.55	85.3131	84.3609	84.7085	96.0411	94.5687	96.118	88.3204	87.965	88.1964	87.191	85.7505	87.262	88.0884	88.0016	88.2503	91.9836	90.5726	90.2156	91.6242	89.9728	94.2581	94.8468	96.0044	92.9595	87.767	86.7478	86.6013	89.2492	93.1684	92.5134	81.1305	91.9581	87.9232	89.694	86.1832	86.7541	96.8001	96.8795	96.5361	97.3619	96.5399	96.5258	87.4035	96.3289	87.9651	92.9822	93.163	92.9078	91.6321
2970.69	82.343	81.139	81.5149	95.2891	93.7078	95.514	86.3938	86.1626	86.4967	86.0636	84.5416	86.3823	86.6222	86.4442	86.6468	90.7472	89.2593	88.6998	90.6108	88.8831	93.5149	94.0818	95.3906	91.7656	85.847	84.5543	84.3446	87.622	92.0223	91.2772	79.0627	90.7388	85.9935	87.7052	83.8399	84.3579	96.7526	96.8671	96.4162	97.2968	96.4638	96.4875	85.2493	95.7045	85.8999	91.7844	91.9626	91.6246	90.2403
2968.82	78.8647	77.4082	77.828	94.3722	92.7183	94.8239	84.1788	83.9762	84.4313	84.8148	83.2793	85.444	84.9444	84.5124	84.7316	89.3288	87.7759	86.974	89.4125	87.5859	92.7236	93.1478	94.7654	90.3886	83.6825	82.0307	81.7206	85.7603	90.7131	89.7577	76.623	89.3421	83.7863	85.4989	81.1614	81.7062	96.6694	96.8008	96.332	97.244	96.4228	96.3478	82.7459	94.977	83.4758	90.4641	90.612	90.2225	88.629
2966.96	75.1521	73.3687	73.834	93.3703	91.6618	94.0682	81.7993	81.5724	82.0435	83.5437	81.9356	84.518	83.0663	82.3688	82.6618	87.8075	86.1152	85.1259	88.1903	86.134	91.9073	92.0935	94.1079	88.867	81.3818	79.3189	78.8918	83.6638	89.2209	88.0831	73.8772	87.7731	81.3622	83.1803	78.2785	78.8127	96.5765	96.7009	96.2618	97.1343	96.326	96.1813	79.9635	94.1575	80.8222	89.0395	89.1676	88.7206	86.8612
2965.1	71.5472	69.3692	69.8547	92.355	90.6053	93.2719	79.3395	79.2076	79.5372	82.3066	80.6592	83.6414	81.1607	80.2763	80.6383	86.3343	84.4345	83.2276	86.9745	84.7072	91.0249	91.0331	93.4304	87.3557	79.0855	76.633	76.1274	81.5013	87.6432	86.3732	71.0249	86.2212	78.9666	80.9488	75.4749	76.0291	96.4614	96.6332	96.1593	97.0221	96.1993	96.0321	77.1722	93.3158	78.2247	87.6917	87.7631	87.2104	85.1019
2963.23	68.4597	65.9456	66.4242	91.3716	89.6416	92.5196	77.0696	77.1118	77.2124	81.2343	79.6385	82.8665	79.5578	78.4985	78.972	85.0552	82.9563	81.483	85.8612	83.4636	90.2845	90.1001	92.7937	85.9997	77.0636	74.2975	73.7668	79.5088	86.1463	84.7795	68.3847	84.8266	76.9423	79.1078	73.1765	73.8584	96.4185	96.5428	96.0439	96.9435	96.0789	95.8533	74.7285	92.5524	75.9525	86.4448	86.4671	85.8694	83.5674
2961.37	66.1377	63.3814	63.822	90.5179	88.8365	91.8884	75.1998	75.3461	75.2968	80.4002	78.8927	82.2301	78.4127	77.1907	77.7655	84.0057	81.7912	80.1332	84.9387	82.4653	89.706	89.3222	92.2427	84.868	75.4212	72.458	71.9174	77.8642	84.9095	83.5391	66.322	83.7718	75.3268	77.7957	71.5884	72.3388	96.3964	96.433	95.8869	96.773	95.957	95.7084	72.896	91.9357	74.2129	85.3623	85.4377	84.834	82.4515
2959.51	64.3037	61.501	61.9258	89.8287	88.1948	91.4084	73.7254	73.8853	73.8046	79.7682	78.372	81.8004	77.5135	76.214	76.8033	83.0905	80.8681	79.1075	84.1607	81.6492	89.1834	88.7274	91.7871	83.9959	74.0201	70.9564	70.3921	76.5776	84.0204	82.5855	64.8643	83.0175	73.8765	76.7681	70.4121	71.2359	96.2291	96.3499	95.73	96.5521	95.789	95.4963	71.5395	91.5085	72.8465	84.5171	84.6549	84.0384	81.5526
2957.64	62.5287	59.8593	60.2949	89.2803	87.614	91.0196	72.5073	72.6523	72.6245	79.315	77.9132	81.5507	76.5586	75.2189	75.786	82.1495	79.9299	78.1632	83.4164	80.8931	88.6176	88.29	91.2635	83.2747	72.594	69.4234	68.8718	75.649	83.3594	81.8093	63.7852	82.1793	72.3674	75.6431	69.1103	70.0423	96.0048	96.2275	95.6208	96.3802	95.5684	95.1911	70.2982	91.1445	71.523	83.8871	83.911	83.3188	80.7656
2955.78	60.5619	58.1312	58.5598	88.7947	87.0192	90.6121	71.4113	71.4776	71.6715	79.0171	77.5218	81.4078	75.4218	74.0604	74.5235	81.1154	78.8765	77.208	82.6749	80.1425	88.0232	87.9556	90.677	82.6397	71.0255	67.66	67.1727	74.9137	82.7681	81.1403	62.8285	81.1356	70.6752	74.1873	67.3452	68.3374	95.8201	96.0312	95.4369	96.1585	95.375	94.901	68.9328	90.7039	70.0322	83.2105	83.1782	82.5901	79.9618
2953.91	58.5504	56.4603	56.8569	88.3749	86.4739	90.236	70.4286	70.3523	70.9091	78.8212	77.2242	81.3137	74.2179	72.8552	73.1814	80.0729	77.8689	76.2397	81.9312	79.4636	87.4732	87.7292	90.214	82.1288	69.4237	65.8621	65.4168	74.3061	82.2742	80.5222	61.9911	80.1376	69.0126	72.6684	65.403	66.4538	95.6567	95.8312	95.1764	95.9019	95.2101	94.5751	67.5645	90.2579	68.4807	82.5117	82.5869	81.9847	79.1617
2952.05	57.0904	55.3584	55.7382	88.1612	86.1459	90.0883	69.8493	69.6019	70.5009	78.7379	77.0723	81.2906	73.3882	71.9928	72.2419	79.3485	77.1768	75.5495	81.4168	79.0874	87.0786	87.6602	89.8907	81.7958	68.2721	64.6488	64.2122	74.0611	82.0655	80.1437	61.6287	79.4822	67.9111	71.6393	64.0302	65.2017	95.4739	95.6892	94.9272	95.6797	94.9924	94.2504	66.6004	89.9775	67.3328	82.1404	82.1925	81.7035	78.6874
2950.19	57.1641	55.7564	56.1143	88.2099	86.2878	90.2484	70.2093	69.8186	70.915	78.9087	77.3029	81.4288	73.4083	72.0698	72.2387	79.4134	77.2364	75.701	81.471	79.2946	87.0755	87.9585	89.9236	82.0032	68.2518	64.7582	64.3482	74.5684	82.4388	80.4342	62.2644	79.5838	68.0465	71.783	64.1905	65.4925	95.2928	95.5178	94.6733	95.4356	94.7513	93.9618	66.808	90.0203	67.3949	82.4633	82.4026	81.9817	78.943
2948.32	59.3433	58.2068	58.5236	88.6735	87.0377	90.7383	71.805	71.2684	72.475	79.2948	77.8787	81.6703	74.3961	73.2523	73.3381	80.3622	78.3085	76.916	82.1925	80.152	87.5573	88.6716	90.4106	83.0045	69.6623	66.4903	66.1222	75.9463	83.3944	81.5234	63.9775	80.5414	69.5798	73.3058	66.1079	67.4297	95.0465	95.2453	94.3215	95.1061	94.3948	93.5132	68.5344	90.4766	69.002	83.4489	83.3824	82.9911	80.105
2946.46	63.1527	62.1786	62.4681	89.5798	88.1247	91.5036	74.2182	73.6129	74.7896	79.719	78.4487	81.8712	76.0348	75.0936	75.1173	81.9624	79.9606	78.7463	83.3905	81.3704	88.3834	89.608	91.1205	84.5265	72.0356	69.2453	68.9335	77.8752	84.7335	83.1363	66.332	82.0325	71.9793	75.6304	69.0019	70.2508	94.5789	94.8515	93.7828	94.6737	93.9377	92.886	71.2705	91.2545	71.6417	84.8534	84.8799	84.512	81.8775
2944.6	67.3356	66.458	66.7506	90.5721	89.2274	92.3032	76.7646	76.1677	77.2427	79.9897	78.8421	81.9144	77.7301	76.9671	76.9378	83.6099	81.619	80.5978	84.6149	82.629	89.3166	90.5333	91.8984	86.0931	74.4637	72.0796	71.793	79.8482	86.161	84.7382	68.6401	83.5906	74.4556	77.9429	71.792	73.0234	93.9505	94.2899	93.1793	94.0774	93.3628	92.0793	74.1097	92.0455	74.4633	86.3461	86.3743	85.9898	83.6805
2942.73	70.6846	69.8538	70.1637	91.3308	90.149	92.9186	78.7865	78.1784	79.1544	80.0171	78.9456	81.7333	78.9967	78.3646	78.3172	84.8242	82.8819	82.0117	85.5071	83.5715	89.9474	91.2375	92.5283	87.3046	76.2602	74.2097	73.9566	81.4022	87.2969	85.9428	70.3025	84.7558	76.3285	79.5983	73.8411	75.0928	93.3151	93.6651	92.4738	93.3738	92.653	91.1501	76.3763	92.6678	76.7317	87.4946	87.4816	87.1324	85.029
2940.87	72.715	71.8784	72.1967	91.7833	90.6938	93.3156	80.0564	79.4015	80.3484	79.8447	78.7435	81.3856	79.6386	79.1073	79.0188	85.4734	83.5556	82.7862	85.9849	84.0364	90.2461	91.6278	92.8354	87.9873	77.2279	75.3604	75.1319	82.2185	87.9719	86.6903	71.091	85.3271	77.2073	80.3726	74.9029	76.2063	92.608	92.9593	91.5768	92.5665	91.8185	90.0211	77.76	93.1026	78.0836	88.0916	88.1032	87.8539	85.8128
2939.01	73.3882	72.5039	72.8167	91.9668	90.783	93.4471	80.466	79.8142	80.831	79.4882	78.3005	80.9317	79.5828	79.165	78.9893	85.5379	83.5874	82.9013	85.9809	84.1294	90.2993	91.7431	92.8542	88.1892	77.3011	75.5015	75.2631	82.3744	88.2086	86.9355	71.0831	85.3269	77.1047	80.3932	74.9951	76.2601	91.6792	92.1067	90.4741	91.5757	90.8377	88.6899	78.2445	93.3296	78.5111	88.2215	88.254	87.9718	86.0941
2937.14	72.7205	71.8291	72.1296	91.899	90.51	93.2768	80.1098	79.5008	80.5758	78.9391	77.6612	80.3844	78.9062	78.5658	78.2883	85.082	83.0886	82.4578	85.5503	83.7625	90.0455	91.5776	92.6174	87.8892	76.5843	74.6971	74.4548	82.0184	87.9572	86.665	70.3792	84.8002	76.1721	79.6627	74.1592	75.3537	90.5128	91.1204	89.2006	90.4352	89.7031	87.1771	77.8639	93.2696	78.0839	87.9308	87.9444	87.58	85.8511
2935.28	70.8939	70.0194	70.3798	91.5369	89.9912	92.8922	79.1004	78.4988	79.68	78.2138	76.8141	79.7497	77.7417	77.3909	76.9762	84.1479	82.1703	81.55	84.7926	82.9527	89.5494	91.176	92.1912	87.1747	75.1636	73.0793	72.8048	81.1999	87.3019	85.9838	69.0705	83.8397	74.5353	78.2417	72.5014	73.7142	89.2624	89.9514	87.705	89.137	88.4429	85.425	76.6946	92.9619	76.8796	87.2344	87.2434	86.9031	85.047
2933.41	68.2441	67.3751	67.7903	90.919	89.238	92.3829	77.5486	76.9447	78.3096	77.432	75.8353	79.103	76.0599	75.6819	75.1239	82.811	80.7949	80.1402	83.7377	81.8479	88.8282	90.5807	91.6158	86.2217	73.0895	70.7685	70.5219	79.9393	86.4043	84.9436	67.2075	82.4497	72.3478	76.2775	70.1681	71.3731	87.8611	88.566	85.9875	87.6535	86.984	83.37	74.8594	92.417	75.0084	86.2563	86.2044	85.9382	83.8564
2931.55	65.1448	64.306	64.7214	90.1597	88.2974	91.7909	75.6617	74.9998	76.6395	76.5914	74.7	78.3858	73.9486	73.5706	72.94	81.2686	79.0808	78.3951	82.4826	80.5148	87.8983	89.8407	90.9173	85.1026	70.6737	68.0312	67.8419	78.3205	85.3167	83.6444	64.9702	80.77	69.7466	73.9583	67.3554	68.6041	86.1499	86.9953	84.078	85.9056	85.2396	81.0031	72.6426	91.7523	72.6909	85.0734	84.9469	84.7308	82.4781
2929.69	62.0048	61.1905	61.6561	89.3813	87.3218	91.1559	73.7321	73.0324	74.8814	75.7002	73.4672	77.6838	71.6843	71.3012	70.5696	79.6552	77.3427	76.61	81.1356	79.1017	86.9068	89.0737	90.1675	83.8994	68.2021	65.233	64.9864	76.5997	84.1516	82.29	62.6742	79.0218	66.9729	71.4974	64.3312	65.6921	84.1645	85.1844	81.8941	83.8176	83.2336	78.2213	70.3669	91.0885	70.3078	83.8448	83.6642	83.4912	81.0376
2927.82	59.1351	58.3448	58.827	88.6543	86.3996	90.5173	71.9258	71.2054	73.2198	74.8505	72.2062	76.9833	69.3512	69.0401	68.0428	78.069	75.7157	74.9389	79.7519	77.7614	85.9609	88.371	89.479	82.7537	65.7753	62.5264	62.2239	75.0324	83.0441	81.0228	60.4883	77.3511	64.3177	69.124	61.3297	62.8597	81.9647	83.093	79.3366	81.496	80.9111	75.048	68.1626	90.4187	68.139	82.7179	82.5178	82.36	79.696
2925.96	56.6099	55.907	56.312	88.0067	85.5816	89.9629	70.2342	69.5153	71.7741	73.9842	70.9371	76.3073	66.9043	66.8488	65.512	76.5813	74.1795	73.3837	78.4484	76.502	85.0757	87.7365	88.8558	81.7809	63.4515	59.9924	59.6899	73.6261	81.9852	79.8349	58.415	75.734	61.762	66.8016	58.3991	60.0933	79.4298	80.6644	76.39	78.8255	78.1689	71.3645	66.0676	89.7285	66.1272	81.7053	81.5056	81.3047	78.4383
2924.1	54.1975	53.6041	53.9819	87.3914	84.84	89.4864	68.6913	67.9287	70.3837	73.022	69.6541	75.6673	64.4064	64.6515	63.0108	75.1387	72.6774	71.8153	77.2105	75.2356	84.2654	87.139	88.2186	80.91	61.2139	57.5739	57.2871	72.3125	80.9536	78.6711	56.4481	74.1548	59.2809	64.5034	55.509	57.4242	76.4548	77.837	72.9811	75.6771	74.9958	67.0119	64.1217	89.0808	64.163	80.7515	80.4832	80.3022	77.2714
2922.23	51.8709	51.3673	51.813	86.7856	84.1258	89.0063	67.283	66.4644	69.0728	72.1232	68.3883	75.1236	62.0665	62.5396	60.5923	73.8409	71.2754	70.342	76.0553	74.1037	83.4527	86.6531	87.6184	80.0258	59.1316	55.2884	54.9893	71.04	79.9787	77.5092	54.6675	72.6747	56.9377	62.3719	52.7963	54.8679	73.0412	74.6355	69.1212	72.1256	71.4284	62.1154	62.2918	88.4774	62.273	79.8314	79.5331	79.4273	76.2046
2920.37	50.0971	49.6732	50.135	86.2582	83.5593	88.587	66.0912	65.3038	68.0718	71.4334	67.3873	74.7176	60.3075	61.0099	58.8189	72.8357	70.2014	69.2644	75.1789	73.2459	82.7356	86.2924	87.1733	79.2874	57.4656	53.4499	53.1504	70.0117	79.2335	76.585	53.4258	71.5554	55.1579	60.8409	50.7911	53.0389	69.5871	71.3361	65.1276	68.4737	67.7066	57.0698	60.8801	87.9639	60.7879	79.1694	78.8704	78.8857	75.424
2918.5	49.3537	49.046	49.4916	85.9369	83.2957	88.3761	65.5154	64.7557	67.5854	71.1047	67.0179	74.6478	59.7444	60.5642	58.3087	72.3736	69.7258	68.8026	74.7587	72.8577	82.3964	86.0458	86.9234	78.9193	56.6877	52.6686	52.3693	69.5771	78.8667	76.1768	53.0811	71.0784	54.4593	60.3754	50.1026	52.5781	66.5856	68.3358	61.5496	65.2311	64.3064	52.4647	60.2524	87.65	60.1431	78.9113	78.6388	78.6488	75.1366
2916.64	49.8705	49.6401	50.0748	85.9378	83.3868	88.3966	65.6814	64.948	67.7028	71.2692	67.3621	75.0304	60.566	61.316	59.1897	72.5607	69.9839	69.0216	74.8901	73.0261	82.4751	86.0331	86.9589	78.9939	57.0249	53.2042	52.8882	69.7971	78.9325	76.3417	53.7372	71.4219	55.0102	61.091	50.9739	53.5046	64.8607	66.4646	59.3404	63.1685	62.0117	49.3732	60.6165	87.7018	60.5454	79.1085	78.8682	78.8249	75.369
2914.78	51.3859	51.1056	51.4951	86.191	83.7581	88.6054	66.3582	65.6733	68.3213	71.8533	68.3121	75.6906	62.2629	62.869	60.976	73.2929	70.7796	69.7442	75.4527	73.5968	82.867	86.2227	87.2873	79.405	58.2401	54.6383	54.3214	70.4052	79.3288	76.8636	55.0163	72.3597	56.4416	62.4778	52.7596	55.2648	64.8439	66.2295	59.1001	62.7918	61.4037	48.537	61.7349	87.9838	61.66	79.575	79.35	79.3406	75.9346
2912.91	53.275	52.8039	53.1687	86.5583	84.2657	88.9247	67.1928	66.6262	69.0694	72.6484	69.4761	76.376	64.1584	64.5775	62.9809	74.2588	71.7563	70.7153	76.173	74.2865	83.3919	86.5055	87.6923	79.938	59.7751	56.338	56.0531	71.1416	79.8674	77.5103	56.4164	73.4223	58.2272	64.0088	54.7885	57.1941	66.1088	67.356	60.4366	63.7164	62.3381	49.6143	63.0673	88.3164	63.0395	80.1496	79.997	79.9207	76.6862
2911.05	55.0544	54.385	54.7705	86.9265	84.8109	89.2614	68.0416	67.5941	69.8043	73.5103	70.5533	77.0699	65.8558	66.108	64.7342	75.212	72.7205	71.7235	76.9488	74.9793	83.954	86.795	88.0697	80.4334	61.2711	58.0159	57.7296	71.8872	80.4019	78.1135	57.6271	74.434	59.9739	65.3998	56.6566	58.9264	67.9129	69.1214	62.495	65.2924	64.0536	51.7106	64.2674	88.666	64.3446	80.756	80.6278	80.4774	77.4301
2909.19	56.694	55.8521	56.2448	87.2112	85.3514	89.5504	68.9207	68.4865	70.4814	74.3182	71.5777	77.7369	67.2636	67.4681	66.1945	76.1185	73.6295	72.6079	77.6712	75.6295	84.4904	87.0845	88.4813	80.9642	62.6484	59.5526	59.235	72.5709	80.8693	78.6778	58.6638	75.4559	61.6203	66.6886	58.263	60.4529	69.7742	70.9477	64.6941	67.1037	65.9372	54.1427	65.3861	89.0313	65.5726	81.373	81.2073	81.0111	78.1424
2907.32	58.3822	57.3523	57.7682	87.5379	85.8756	89.8318	69.8393	69.3963	71.1774	75.0632	72.5091	78.3981	68.5454	68.7357	67.5888	77.046	74.5229	73.4648	78.3887	76.3176	84.9994	87.4703	88.9193	81.6041	64.0439	61.08	60.7355	73.2278	81.3368	79.2697	59.6925	76.4017	63.1885	67.9758	59.746	61.8889	71.4782	72.5774	66.7468	68.7898	67.7233	56.4992	66.5117	89.3556	66.7989	81.9362	81.8294	81.5553	78.8692
2905.46	60.1951	59.0501	59.4823	87.994	86.436	90.1879	70.8497	70.3949	72.0405	75.7347	73.3774	78.9704	69.8673	69.9878	68.9933	77.9749	75.4785	74.4033	79.1304	77.0901	85.5061	87.9135	89.3714	82.3044	65.5459	62.6758	62.3659	74.0179	81.9441	79.938	60.85	77.3381	64.7777	69.3445	61.3517	63.4665	72.9785	74.0221	68.488	70.2934	69.3222	58.6152	67.758	89.724	68.1589	82.5639	82.55	82.2422	79.6228
2903.6	62.1931	61.0337	61.4754	88.512	87.072	90.6059	72.1213	71.6431	73.137	76.443	74.2611	79.5063	71.2148	71.3492	70.4049	78.9879	76.5909	75.5018	79.9584	77.9122	86.0768	88.3622	89.8469	83.0697	67.1622	64.3903	64.1436	75.051	82.647	80.7354	62.1775	78.3863	66.4565	70.8012	63.1026	65.1878	74.2197	75.2727	69.9338	71.5634	70.6617	60.4593	69.2791	90.1776	69.6723	83.3682	83.3268	83.1067	80.4901
2901.73	64.462	63.2694	63.7196	89.0713	87.7981	91.0688	73.5728	73.1188	74.4495	77.1881	75.1365	80.1214	72.5899	72.8185	71.8937	80.1197	77.7768	76.7424	80.8684	78.8054	86.7026	88.9463	90.3787	83.9412	68.8408	66.2682	66.0157	76.3081	83.4612	81.6883	63.7014	79.4817	68.2255	72.3224	65.0262	67.0507	75.3208	76.3674	71.243	72.67	71.8907	62.1093	71.0041	90.6692	71.3103	84.2781	84.2415	84.0382	81.5709
2899.87	66.7769	65.582	65.9981	89.6428	88.4895	91.5282	75.0734	74.609	75.857	77.9805	76.0008	80.7695	73.9504	74.2488	73.3416	81.234	78.8504	77.9586	81.7536	79.7106	87.3535	89.5496	90.9237	84.8381	70.51	68.1565	67.8433	77.5542	84.3607	82.69	65.2671	80.5391	69.9277	73.786	66.8598	68.8487	76.3081	77.3111	72.395	73.6836	73.0198	63.499	72.672	91.1812	72.9802	85.1528	85.1731	84.8843	82.5963
2898	68.7844	67.6116	68.0463	90.1883	89.0606	91.9429	76.3694	75.9194	77.1374	78.7263	76.7901	81.3398	75.1605	75.4946	74.6035	82.1659	79.8079	78.9926	82.4787	80.4882	87.9013	90.0219	91.3967	85.6793	72.005	69.7797	69.4461	78.6211	85.1501	83.5894	66.6375	81.523	71.3775	75.1073	68.4974	70.4175	77.1524	78.1404	73.4185	74.6664	74.021	64.7803	74.1569	91.6673	74.4652	85.9136	85.9617	85.6486	83.4918
2896.14	70.4021	69.2824	69.705	90.6247	89.5599	92.2795	77.4141	77.003	78.2157	79.3707	77.5454	81.8278	76.1483	76.5003	75.6632	82.8985	80.6831	79.8974	83.0764	81.1258	88.3243	90.4563	91.7824	86.3538	73.2153	71.1152	70.8156	79.4692	85.7823	84.3178	67.7638	82.2736	72.5506	76.2401	69.8635	71.7435	77.9237	78.9158	74.3477	75.5268	74.8691	66.0135	75.339	92.06	75.6172	86.5352	86.5468	86.2902	84.281
2894.28	71.5834	70.5431	70.9279	90.9095	89.9425	92.5281	78.2471	77.8475	78.9726	79.8528	78.2057	82.2259	76.9394	77.2412	76.4723	83.465	81.3561	80.6308	83.6202	81.6842	88.706	90.8015	92.0675	86.8494	74.1326	72.1646	71.9082	80.1318	86.3327	84.9187	68.655	82.853	73.5277	77.1161	70.9219	72.7661	78.7112	79.6693	75.2351	76.3567	75.7352	67.2506	76.2404	92.3543	76.5256	87.0114	87.0332	86.7477	84.8645
2892.41	72.2977	71.3528	71.6994	91.1263	90.1738	92.6893	78.8276	78.3861	79.4907	80.2659	78.7366	82.5636	77.5337	77.741	77.025	83.8814	81.8393	81.1128	84.0413	82.1534	88.9817	90.9936	92.2121	87.2044	74.8045	72.8992	72.6646	80.6269	86.6958	85.3443	69.2711	83.335	74.2239	77.7049	71.6698	73.4698	79.5078	80.4346	76.1385	77.227	76.589	68.4552	76.837	92.5695	77.1355	87.3096	87.3553	87.0928	85.2176
2890.55	72.6342	71.7452	72.0598	91.2651	90.3161	92.7758	79.1123	78.7002	79.8602	80.6725	79.1958	82.8537	77.8875	78.0795	77.3906	84.1174	82.1326	81.3784	84.3593	82.454	89.139	91.0948	92.2495	87.3941	75.2342	73.339	73.11	80.9454	86.9301	85.5907	69.7094	83.675	74.6407	78.0693	72.1887	73.9244	80.3412	81.2423	77.1389	78.1258	77.4767	69.7432	77.1385	92.6879	77.4069	87.4696	87.4528	87.2652	85.3887
2888.69	72.6067	71.7532	72.0903	91.3106	90.3739	92.8155	79.1989	78.8322	80.0162	81.0148	79.5922	83.1385	78.0696	78.2848	77.6285	84.22	82.2494	81.516	84.5319	82.637	89.2563	91.0976	92.2792	87.3931	75.4448	73.5626	73.3107	81.0897	86.9907	85.6698	69.9456	83.8286	74.8391	78.2937	72.4395	74.1138	81.1832	82.0538	78.1768	79.0576	78.4517	71.0716	77.2052	92.7457	77.41	87.4793	87.461	87.2352	85.3882
2886.82	72.2644	71.463	71.82	91.3266	90.3117	92.7907	79.1343	78.7229	79.9445	81.2632	79.837	83.3191	78.1512	78.3167	77.6954	84.2277	82.2652	81.5365	84.5621	82.7598	89.2902	91.0445	92.2946	87.2885	75.4633	73.5647	73.3005	81.0954	86.9269	85.6235	69.9867	83.8653	74.9157	78.4214	72.5018	74.1204	82.0795	82.8943	79.2619	80.1213	79.4985	72.512	77.0459	92.75	77.2582	87.4269	87.4128	87.1333	85.2781
2884.96	71.6011	70.8588	71.1856	91.231	90.1277	92.6932	78.8728	78.3971	79.669	81.4059	79.9051	83.3756	78.0742	78.1091	77.5604	84.0744	82.1471	81.4122	84.5153	82.7114	89.1997	90.9547	92.2027	87.0699	75.2428	73.2794	73.0564	80.8729	86.7775	85.4717	69.8645	83.7584	74.7661	78.28	72.3296	73.8794	83.0424	83.8094	80.3731	81.2361	80.544	74.0234	76.6281	92.6307	76.8626	87.2599	87.2547	86.9217	85.0286
2883.1	70.5802	69.877	70.1767	91.004	89.8767	92.5001	78.34	77.8439	79.2076	81.4121	79.8664	83.2933	77.7789	77.6716	77.2281	83.6992	81.8283	81.1142	84.3337	82.4854	89.0484	90.7778	91.99	86.6866	74.7063	72.6555	72.5144	80.434	86.5428	85.1875	69.5374	83.4313	74.2186	77.8792	71.9153	73.5056	84.0008	84.7726	81.545	82.3623	81.6504	75.6218	75.9699	92.4604	76.1663	86.911	86.9463	86.6213	84.6218
2881.23	69.3059	68.6358	68.9681	90.7568	89.5667	92.2721	77.6395	77.1794	78.6671	81.2679	79.7948	83.1737	77.3191	77.1218	76.7118	83.2311	81.3934	80.676	84.033	82.2008	88.8791	90.5177	91.704	86.2515	74.022	71.9047	71.774	79.9831	86.2554	84.7742	69.0307	83.0031	73.4627	77.4084	71.3579	73.0505	84.9735	85.7364	82.7747	83.5356	82.8681	77.3539	75.1667	92.2308	75.325	86.4772	86.517	86.2651	84.0953
2879.37	68.2199	67.6205	67.9887	90.5519	89.2908	92.1017	77.0773	76.5891	78.1588	81.0672	79.6223	83.0225	76.9273	76.6758	76.2982	82.8508	81.0637	80.3145	83.7615	81.9782	88.7104	90.2859	91.4953	85.9316	73.5011	71.3524	71.167	79.6777	85.9977	84.4528	68.6106	82.7373	72.9255	77.1147	71.0473	72.7444	85.9905	86.7188	83.9636	84.8003	84.1243	79.1514	74.5488	92.0244	74.6698	86.1607	86.2021	86.003	83.6895
2877.5	67.7579	67.2879	67.6538	90.4397	89.2002	92.0161	76.8827	76.2907	77.9323	80.9393	79.4871	82.8652	76.8502	76.5491	76.2105	82.7555	80.9942	80.2177	83.6784	81.9162	88.6361	90.1821	91.4036	85.8201	73.3508	71.2077	71.0129	79.5671	85.8858	84.3336	68.5587	82.682	72.7616	77.1299	71.0938	72.8372	86.9458	87.6408	85.0844	86.0633	85.2883	80.8345	74.3774	91.9295	74.4505	86.0392	86.0762	85.9001	83.5549
2875.64	67.8647	67.4239	67.7672	90.416	89.2257	92.0011	76.9223	76.2729	77.974	80.8228	79.4096	82.7544	77.0275	76.6452	76.2955	82.8313	81.0515	80.2437	83.6794	81.9236	88.6378	90.1714	91.3711	85.8766	73.435	71.3447	71.1695	79.6154	85.9177	84.338	68.7816	82.7538	72.8601	77.3121	71.3025	73.0588	87.8179	88.4752	86.1413	87.2112	86.389	82.3733	74.4505	91.8969	74.5619	86.0783	86.1142	85.9558	83.5629
2873.78	67.8842	67.4127	67.7655	90.3244	89.209	91.9668	76.8591	76.2456	77.9719	80.7692	79.4551	82.7087	77.1611	76.6997	76.3248	82.8274	80.9838	80.2019	83.6719	81.937	88.6273	90.1253	91.3251	85.8749	73.4323	71.3536	71.1716	79.6147	85.9072	84.2946	68.8358	82.7679	72.8794	77.2918	71.2755	72.982	88.5301	89.2294	87.0563	88.1465	87.3441	83.6573	74.4071	91.8823	74.5219	86.1309	86.0924	85.9085	83.4832
2871.91	67.4199	67.0065	67.3767	90.1507	89.0745	91.8986	76.5616	75.9713	77.6808	80.8044	79.5973	82.7778	77.0401	76.5913	76.1847	82.6638	80.7753	80.025	83.5739	81.8234	88.5324	90.0276	91.2483	85.7041	73.1243	71.0378	70.8191	79.4553	85.7856	84.1529	68.5819	82.6066	72.6039	76.9919	70.8662	72.5631	89.0804	89.8041	87.7226	88.8665	88.0823	84.7251	74.129	91.793	74.1599	85.9924	85.9313	85.6627	83.2685
2870.05	66.8574	66.5197	66.8738	90.0606	88.9294	91.8433	76.2103	75.6191	77.3553	80.8692	79.6552	82.8911	76.7361	76.3373	75.886	82.4213	80.518	79.7951	83.4206	81.6233	88.3849	89.953	91.1841	85.4595	72.7306	70.6151	70.3638	79.2065	85.6023	83.9843	68.24	82.3493	72.2822	76.5603	70.3758	72.023	89.535	90.1653	88.2214	89.3149	88.5948	85.4822	73.6853	91.641	73.7042	85.7502	85.7647	85.4613	83.0808
2868.19	67.0383	66.7466	67.0941	90.131	89.0424	91.9049	76.2587	75.7035	77.4235	80.8989	79.6773	82.9349	76.6839	76.2829	75.8523	82.4302	80.529	79.8353	83.4645	81.6394	88.3769	90.0841	91.1853	85.5454	72.7921	70.6713	70.4329	79.2574	85.6299	84.045	68.2954	82.362	72.3938	76.5455	70.3489	72.0293	89.8051	90.3367	88.4777	89.5302	88.9025	85.8175	73.6629	91.6017	73.7122	85.8225	85.8895	85.6071	83.1839
2866.32	68.7793	68.5212	68.9101	90.422	89.5612	92.2296	77.2725	76.6853	78.3179	80.9408	79.8534	82.9467	77.2675	76.8984	76.5017	83.0452	81.1763	80.4841	83.9381	82.1519	88.7045	90.5559	91.4788	86.2769	73.7252	71.7783	71.5862	80.0046	86.1012	84.5499	69.1785	82.9457	73.3618	77.4041	71.2807	73.1134	89.7606	90.3217	88.3752	89.4859	88.8731	85.7411	74.6379	91.8425	74.7517	86.5119	86.577	86.3157	83.9439
2864.46	72.0675	71.7921	72.1968	90.9744	90.4601	92.8156	79.1493	78.5219	79.9752	80.9927	80.145	82.9413	78.3947	78.2092	77.7451	84.2191	82.3883	81.6922	84.7857	83.0665	89.3344	91.3056	92.1564	87.4942	75.4219	73.7921	73.6561	81.3762	87.004	85.5947	70.7306	84.046	75.1514	78.997	73.1558	75.0656	89.3817	90.0282	87.9554	89.1304	88.4666	85.215	76.6603	92.4133	76.8325	87.6841	87.7138	87.531	85.3407
2862.59	75.8844	75.5952	75.9448	91.6946	91.5013	93.4818	81.3297	80.7047	81.9422	81.096	80.346	82.9575	79.6079	79.6704	79.102	85.5366	83.7306	83.0691	85.7522	84.0285	90.0039	92.1256	92.9386	88.8508	77.2988	75.9686	75.9011	82.8398	88.0638	86.8468	72.3154	85.1877	77.0606	80.6345	75.1759	77.08	88.6039	89.3056	87.0414	88.2793	87.6617	84.0892	79.0879	93.1142	79.2807	89.006	89.0216	88.8762	86.8847
2860.73	79.2114	78.9261	79.2387	92.357	92.3876	94.0835	83.2889	82.6735	83.7512	81.2112	80.3757	82.94	80.4807	80.7419	80.0595	86.5873	84.7208	84.1933	86.4141	84.6936	90.4512	92.8666	93.6299	90.021	78.79	77.6881	77.6244	84.0236	88.942	87.8571	73.4188	85.9602	78.4306	81.8033	76.6106	78.4842	87.3188	88.0168	85.4703	86.8291	86.3243	82.2011	81.2238	93.7291	81.4465	90.1375	90.1792	89.9935	88.2522
2858.87	81.6592	81.4067	81.6839	92.8282	93.0041	94.523	84.7731	84.2086	85.1307	81.097	80.1757	82.8061	80.7097	81.2018	80.3273	87.1631	85.231	84.8586	86.6861	84.9606	90.6647	93.4107	94.1352	90.8732	79.5713	78.6742	78.5201	84.7934	89.4907	88.4509	73.8307	86.2179	78.9805	82.2035	77.1851	79.0113	85.2591	86.0172	83.0788	84.6609	84.1001	79.1744	82.7997	94.1795	83.034	90.857	90.972	90.8206	89.2743
2857	83.2269	82.9592	83.2175	93.1556	93.3461	94.7839	85.7317	85.1984	86.0433	80.7182	79.6202	82.42	80.155	81.0377	79.8426	87.3172	85.3463	85.058	86.5774	84.873	90.6657	93.7358	94.4451	91.4532	79.6483	78.8627	78.6638	85.091	89.7335	88.7033	73.6405	86.0348	78.7406	81.9296	76.9866	78.7989	82.1717	83.131	79.561	81.4399	80.8213	74.7496	83.8449	94.5156	84.0788	91.2729	91.4106	91.3396	89.945
2855.14	84.0309	83.6743	83.9738	93.3465	93.475	94.9027	86.2793	85.7257	86.5973	80.0486	78.5843	81.8341	78.9911	80.4154	78.7431	87.1466	85.1411	84.982	86.1566	84.5015	90.4513	93.8721	94.5792	91.7594	79.2851	78.4554	78.2832	85.0343	89.7065	88.7061	72.9952	85.5057	77.8689	81.2201	76.1517	78.0267	78.0492	79.1873	74.8062	77.051	76.4116	68.8268	84.3426	94.733	84.6257	91.4684	91.5795	91.5676	90.2889
2853.28	84.1215	83.7111	84.0126	93.3856	93.457	94.9215	86.4006	85.8911	86.7702	79.1395	77.2423	81.2107	77.7776	79.7132	77.5881	86.8436	84.7875	84.7865	85.6764	84.0447	90.1362	93.8638	94.5895	91.7953	78.7678	77.7997	77.6736	84.8592	89.6039	88.58	72.2319	84.8762	76.8574	80.4486	75.1288	77.1545	73.3529	74.6508	69.3082	71.9682	71.2745	61.8439	84.4861	94.785	84.7665	91.4743	91.5843	91.5861	90.3517
2851.41	83.5339	83.1101	83.4295	93.3415	93.297	94.8705	86.1471	85.6686	86.5767	78.4279	76.339	80.8924	77.289	79.4129	77.1633	86.6589	84.5562	84.5878	85.4691	83.7835	89.973	93.7351	94.5425	91.6082	78.4478	77.3011	77.2125	84.678	89.4968	88.4467	71.8127	84.517	76.3457	80.0751	74.5691	76.6671	69.182	70.6603	64.3356	67.2257	66.4621	55.202	84.3179	94.6731	84.5596	91.3277	91.3728	91.3596	90.133
2849.55	82.3398	81.8093	82.177	93.2279	93.0397	94.7264	85.4849	85.0406	86.0005	78.4312	76.4585	81.1641	77.6978	79.625	77.5548	86.571	84.4248	84.3996	85.5089	83.7255	90.0031	93.4603	94.3918	91.1727	78.3651	77.0793	76.9532	84.4542	89.3774	88.3115	71.8343	84.568	76.4254	80.1413	74.5521	76.575	67.0506	68.503	61.5924	64.3322	63.5732	51.0069	83.7343	94.4951	83.9823	90.9611	90.9371	90.9044	89.6755
2847.69	80.5015	79.7986	80.1791	92.9264	92.6231	94.4079	84.384	83.9928	85.0418	79.134	77.4089	81.8886	78.2654	79.7997	78.0293	86.2966	84.1408	84.0231	85.501	83.704	89.985	93.0007	94.0698	90.4244	78.1085	76.7253	76.5158	83.9936	89.0853	87.9807	71.7492	84.6522	76.4582	80.0227	74.3968	76.3019	67.3388	68.6075	61.6861	63.8984	63.2426	50.2681	82.5762	94.2	82.8523	90.319	90.3409	90.1941	88.9139
2845.82	77.8932	77.0212	77.4482	92.3895	91.9481	93.9088	82.8208	82.5014	83.5655	79.9779	78.4853	82.6229	78.3733	79.3921	78.0064	85.626	83.5518	83.2557	85.2616	83.4386	89.7589	92.3528	93.5893	89.4111	77.3385	75.7772	75.5049	83.1164	88.406	87.243	71.0555	84.3799	75.9328	79.328	73.6007	75.4168	69.2527	70.3804	63.8661	65.5191	64.8599	52.3291	80.8105	93.7128	81.1462	89.3757	89.4379	89.248	87.7549
2843.96	74.6322	73.6371	74.0979	91.6641	91.1082	93.3068	80.8072	80.5707	81.6311	80.6728	79.3217	83.2968	77.9056	78.4351	77.3691	84.6738	82.6357	82.1017	84.7269	82.8113	89.3791	91.5435	93.0283	88.1687	76.0508	74.1897	73.8751	81.7715	87.3618	86.1394	69.7444	83.6636	74.8086	78.1535	72.1669	73.9049	71.8888	72.8954	66.9989	68.2143	67.4987	55.9295	78.6122	93.1119	78.9681	88.2148	88.2612	88.088	86.3336
2842.09	71.2548	70.1712	70.5877	90.8931	90.2409	92.673	78.7344	78.46	79.6196	81.1724	79.8602	83.901	77.0491	77.2218	76.3864	83.6377	81.5434	80.8304	84.0367	82.0047	88.8938	90.7095	92.4185	86.8846	74.5308	72.3473	72.0596	80.2267	86.1836	84.8849	68.2351	82.7956	73.4648	76.9474	70.6568	72.3502	74.5959	75.5156	70.2745	71.2347	70.4338	60.1149	76.2995	92.4565	76.7195	87.0895	87.1465	86.8929	84.8701
2840.23	68.5694	67.438	67.8082	90.2407	89.5449	92.1621	77.0784	76.7373	77.9239	81.5583	80.3286	84.3315	76.2969	76.2386	75.5971	82.803	80.6981	79.8361	83.4779	81.3797	88.4513	90.1014	91.901	85.8827	73.3155	70.9623	70.717	78.9526	85.2417	83.8286	67.1398	82.1829	72.454	76.2526	69.7715	71.4973	77.0487	77.9118	73.2113	74.0877	73.2005	64.1101	74.4442	91.8397	74.9962	86.2204	86.3106	85.9908	83.7096
2838.37	67.5151	66.353	66.7745	89.8857	89.2953	91.9561	76.3022	76.0219	77.1272	81.9523	80.9256	84.6984	76.2339	76.0785	75.5634	82.6403	80.5722	79.5427	83.3539	81.2541	88.3125	89.9471	91.7538	85.5786	73.0966	70.7737	70.5184	78.431	84.87	83.3751	67.0138	82.1831	72.457	76.5754	70.0864	71.9541	79.1101	79.9486	75.7017	76.5665	75.6196	67.5869	73.8295	91.5742	74.3709	85.9614	86.0357	85.7448	83.2951
2836.5	68.7703	67.6374	68.0855	90.036	89.6711	92.145	76.9038	76.6709	77.6524	82.45	81.7054	85.1165	77.1512	76.9913	76.5637	83.4185	81.3574	80.2403	83.8875	81.8649	88.6773	90.3413	92.0544	86.1712	74.2393	72.1542	71.9393	78.9503	85.1989	83.7613	68.2083	83.0247	73.8294	78.0927	71.8777	73.8412	80.7546	81.5846	77.7491	78.6431	77.6583	70.4763	74.8033	91.811	75.2378	86.5034	86.5963	86.307	83.8469
2834.64	71.9964	70.9606	71.3233	90.6341	90.5981	92.7026	78.6904	78.4413	79.2572	83.0792	82.6224	85.6034	78.8585	78.7435	78.4334	84.9094	82.8593	81.7728	85.0248	83.0366	89.4714	91.1484	92.6957	87.4388	76.4395	74.7636	74.6529	80.3681	86.1589	84.8945	70.4889	84.5489	76.2842	80.4497	74.6921	76.6451	82.1388	82.9689	79.4281	80.3764	79.3965	72.8887	76.9534	92.4006	77.3805	87.6848	87.8387	87.5372	85.1418
2832.78	75.9538	74.9817	75.3204	91.4148	91.7274	93.4056	80.936	80.7328	81.3863	83.8114	83.5838	86.1816	80.827	80.8137	80.6126	86.6076	84.6427	83.6008	86.3911	84.4066	90.4054	92.0913	93.4374	88.9726	79.0402	77.7932	77.7212	82.1729	87.4469	86.3451	73.0643	86.2221	79.0383	82.9368	77.6578	79.5476	83.3229	84.1423	80.8365	81.8363	80.8354	74.9204	79.4552	93.0735	79.9487	89.0775	89.2594	88.961	86.7169
2830.91	79.6146	78.6763	79.0285	92.1806	92.7636	94.0883	83.0678	82.9234	83.4621	84.55	84.458	86.6968	82.6335	82.7807	82.5962	88.1623	86.2816	85.2824	87.6814	85.6805	91.2264	92.9629	94.1376	90.4007	81.478	80.5577	80.5288	83.8945	88.7128	87.7393	75.3624	87.7564	81.5305	85.1357	80.234	82.0924	84.3273	85.1241	82.0264	83.0506	82.0602	76.6531	81.8205	93.7331	82.331	90.3862	90.5591	90.2786	88.2408
2829.05	82.5761	81.7284	82.0106	92.8475	93.6115	94.6606	84.8812	84.7171	85.2105	85.1762	85.1939	87.1382	84.1382	84.437	84.2334	89.4381	87.6081	86.7178	88.7332	86.7772	91.934	93.7231	94.7137	91.5648	83.5001	82.8078	82.868	85.3349	89.7583	88.9262	77.2537	89.0108	83.5933	86.9268	82.3217	84.1639	85.2001	85.9332	83.069	84.1	83.1419	78.1334	83.8599	94.3347	84.2431	91.4215	91.6437	91.3799	89.5074
2827.19	84.8333	84.081	84.3311	93.3733	94.2552	95.0908	86.3468	86.1383	86.6068	85.7187	85.8662	87.5634	85.3263	85.7185	85.5593	90.4572	88.656	87.8802	89.5619	87.6222	92.5401	94.3787	95.1672	92.496	85.1055	84.6036	84.6552	86.4909	90.5897	89.9027	78.7938	89.9991	85.2325	88.35	84.014	85.7586	85.961	86.6214	83.9719	85.0378	84.0287	79.4358	85.4475	94.8556	85.7885	92.2561	92.4808	92.24	90.5426
2825.32	86.5578	85.8703	86.2059	93.7476	94.7329	95.4565	87.4621	87.332	87.7427	86.2112	86.5211	87.9381	86.2776	86.6909	86.596	91.2814	89.4818	88.7566	90.2962	88.2857	92.9724	94.8749	95.5572	93.199	86.3721	86.0057	86.0118	87.4202	91.2558	90.6499	79.9775	90.7995	86.4805	89.464	85.3354	86.9748	86.5953	87.2584	84.7707	85.8831	84.8091	80.5531	86.6199	95.2333	87.0366	92.9421	93.1068	92.9241	91.3355
2823.46	87.9349	87.3082	87.66	94.0576	95.1112	95.7548	88.3152	88.3191	88.6103	86.6102	87.0869	88.2743	87.0814	87.5164	87.3934	91.9065	90.1404	89.4345	90.8621	88.867	93.2711	95.2428	95.9185	93.7309	87.3397	87.0924	87.1079	88.1999	91.8123	91.2465	80.8465	91.4182	87.5044	90.3504	86.3615	87.9755	87.1587	87.8713	85.4873	86.5592	85.5659	81.5581	87.5605	95.5405	87.9698	93.4801	93.6269	93.4459	91.9543
2821.59	89.016	88.4534	88.7452	94.3331	95.4019	95.943	89.0382	89.0454	89.287	87.0284	87.5126	88.5755	87.7387	88.2405	88.0455	92.3811	90.7136	90.0178	91.2442	89.3516	93.5612	95.5329	96.1967	94.1785	88.1185	87.9769	88.0461	88.8396	92.2424	91.7441	81.5773	91.9114	88.3107	91.049	87.2061	88.8051	87.6912	88.3614	86.1037	87.1638	86.2043	82.459	88.4012	95.8327	88.7186	93.9063	94.0509	93.8714	92.4903
2819.73	89.8337	89.3178	89.5841	94.544	95.6422	96.0891	89.5919	89.5985	89.9021	87.4057	87.8888	88.8294	88.2976	88.8026	88.6545	92.7852	91.1864	90.5043	91.5928	89.7192	93.836	95.8003	96.3877	94.5703	88.7789	88.683	88.8026	89.3298	92.5831	92.1359	82.2061	92.3072	88.9199	91.6327	87.9078	89.4428	88.139	88.7825	86.6107	87.7826	86.7704	83.265	89.0629	96.0707	89.353	94.2011	94.3709	94.2534	92.885
2817.87	90.4772	90.0008	90.2761	94.7106	95.8534	96.2426	90.0334	90.0735	90.3948	87.6956	88.2858	89.0945	88.747	89.2337	89.17	93.1191	91.5273	90.8777	91.9567	90.0164	94.0403	96.0207	96.5532	94.8826	89.3238	89.2635	89.3618	89.7052	92.8762	92.4594	82.6876	92.6225	89.3855	92.1397	88.504	89.9679	88.5123	89.1754	87.0266	88.322	87.2687	83.9651	89.5233	96.2282	89.8697	94.46	94.5964	94.5104	93.1515
2816	91.0109	90.5638	90.8254	94.8812	96.0717	96.3678	90.4154	90.4809	90.7588	87.9713	88.6067	89.3492	89.0886	89.5826	89.5441	93.3974	91.8287	91.1824	92.1957	90.2981	94.2002	96.145	96.6734	95.1194	89.778	89.7341	89.8298	90.027	93.1229	92.6968	83.1229	92.9189	89.8056	92.5364	89.0094	90.426	88.8564	89.5268	87.4886	88.7584	87.7204	84.604	89.9329	96.3685	90.3208	94.7141	94.8053	94.6878	93.4075
2814.14	91.4649	91.0558	91.2742	95.0316	96.2338	96.4524	90.7737	90.8169	91.0721	88.2271	88.8663	89.5633	89.3605	89.8798	89.8768	93.6197	92.1207	91.4537	92.3791	90.5305	94.3675	96.2421	96.7813	95.2833	90.1461	90.1524	90.252	90.2973	93.307	92.9225	83.5277	93.1629	90.2229	92.843	89.4495	90.7812	89.2156	89.8962	87.9246	89.1931	88.1865	85.1997	90.3183	96.5044	90.691	94.9114	95.0101	94.895	93.687
2812.28	91.8583	91.4507	91.6797	95.1516	96.3363	96.5244	91.1319	91.0981	91.3496	88.4176	89.1122	89.7315	89.6366	90.1799	90.1699	93.817	92.353	91.6946	92.5627	90.7176	94.471	96.3871	96.9281	95.474	90.4715	90.596	90.646	90.5671	93.4689	93.1529	83.8524	93.3449	90.594	93.178	89.8118	91.1373	89.5368	90.1815	88.3006	89.5941	88.6475	85.7129	90.667	96.6091	91.0138	95.0815	95.1881	95.1127	93.9476
2810.41	92.2409	91.7879	92.0981	95.229	96.4644	96.6017	91.4143	91.3809	91.6177	88.5735	89.3924	89.8654	89.9037	90.4771	90.4116	94.0328	92.5338	91.947	92.7425	90.9275	94.5382	96.5228	97.0436	95.6807	90.8054	90.9795	90.9972	90.8025	93.6362	93.3307	84.1359	93.536	90.9279	93.5252	90.1619	91.483	89.8043	90.4235	88.6477	89.943	89.0116	86.2267	90.9604	96.6831	91.3169	95.203	95.3804	95.2701	94.1571
2808.55	92.6248	92.2147	92.4666	95.2824	96.5809	96.7264	91.6046	91.6706	91.8877	88.7228	89.6399	90.0636	90.1335	90.7758	90.7049	94.2643	92.752	92.2231	92.909	91.139	94.6676	96.6547	97.1453	95.8807	91.1805	91.3066	91.3482	91.018	93.8259	93.5279	84.4376	93.7661	91.2699	93.8228	90.5504	91.8648	90.0498	90.6658	88.9556	90.2591	89.3214	86.7028	91.2769	96.7747	91.6025	95.3498	95.5593	95.4517	94.3283
2806.68	93.0375	92.7041	92.9102	95.3862	96.6837	96.8464	91.8825	91.975	92.1865	88.8989	89.8169	90.3128	90.4109	91.0522	91.0334	94.5182	93.009	92.4739	93.1198	91.3105	94.8163	96.775	97.2579	96.0741	91.5424	91.6778	91.7488	91.2755	94.0369	93.7258	84.7491	94.0112	91.5926	94.1641	90.9257	92.2311	90.2703	90.8796	89.2252	90.5149	89.5789	87.081	91.589	96.8871	91.8927	95.5503	95.7199	95.6647	94.506
2804.82	93.4978	93.132	93.4227	95.5259	96.8026	96.9316	92.1948	92.2989	92.4941	89.116	90.0197	90.5089	90.717	91.3275	91.3141	94.7553	93.2174	92.691	93.3433	91.4701	94.9607	96.8837	97.4033	96.2337	91.8496	92.0465	92.1485	91.5388	94.2163	93.9186	85.0764	94.2204	91.9104	94.4988	91.2807	92.5632	90.5018	91.0974	89.4574	90.8144	89.849	87.4494	91.9124	96.9794	92.2455	95.7138	95.8821	95.8356	94.6735
2802.96	93.9255	93.5152	93.8243	95.6215	96.9508	97.0197	92.4462	92.5538	92.7496	89.3245	90.2322	90.6168	90.9722	91.6025	91.5182	94.932	93.4198	92.8743	93.522	91.6869	95.0595	97.0015	97.5258	96.401	92.1601	92.3659	92.4776	91.7424	94.3495	94.0992	85.3358	94.3562	92.2306	94.7347	91.5936	92.8704	90.7382	91.331	89.7128	91.1087	90.1309	87.8482	92.201	97.0591	92.578	95.8419	96.0436	95.9828	94.8341
2801.09	94.2187	93.8459	94.0784	95.6835	97.0839	97.0883	92.6728	92.7518	92.9381	89.4582	90.4256	90.7147	91.18	91.813	91.7377	95.0798	93.6252	93.0521	93.6458	91.8749	95.1248	97.0834	97.6043	96.5558	92.4374	92.6437	92.7696	91.9343	94.4578	94.2333	85.5318	94.4995	92.4963	94.924	91.831	93.1417	90.9576	91.5378	89.9531	91.2914	90.3586	88.2207	92.4321	97.1354	92.7791	95.988	96.1801	96.1138	94.979
2799.23	94.3967	94.0833	94.2853	95.7295	97.1421	97.1582	92.8531	92.9619	93.096	89.5695	90.5767	90.8564	91.3458	91.9591	91.9764	95.2271	93.7821	93.2048	93.7192	91.9892	95.1941	97.1528	97.6834	96.6695	92.6217	92.872	93.0234	92.0889	94.5602	94.3358	85.7365	94.6651	92.6893	95.0649	92.0375	93.3434	91.1314	91.6715	90.186	91.5039	90.5853	88.5169	92.6077	97.182	92.9314	96.087	96.2358	96.2147	95.1293
2797.37	94.5913	94.2632	94.4981	95.7771	97.2071	97.2182	92.9876	93.0895	93.2358	89.6536	90.7016	90.9919	91.4896	92.1073	92.1471	95.3598	93.8855	93.3184	93.7994	92.0524	95.2687	97.2563	97.7535	96.7557	92.7946	93.0575	93.2133	92.1969	94.6662	94.4062	85.9135	94.7749	92.8647	95.2625	92.2317	93.4899	91.2886	91.8434	90.4017	91.8005	90.8618	88.8071	92.7599	97.277	93.1353	96.1729	96.2966	96.3057	95.2622
2795.5	94.7886	94.4617	94.7042	95.8264	97.2861	97.2207	93.1341	93.2053	93.3726	89.7666	90.8333	91.0839	91.6221	92.2744	92.2579	95.4614	93.9887	93.4437	93.96	92.1583	95.3315	97.342	97.808	96.8414	93.0102	93.2177	93.3773	92.2965	94.7432	94.5059	86.0589	94.8559	93.0341	95.4641	92.4378	93.657	91.447	92.0584	90.5596	92.0332	91.0692	89.1409	92.9106	97.3571	93.3199	96.2791	96.3962	96.4014	95.3567
2793.64	94.959	94.6861	94.9044	95.88	97.3129	97.2343	93.2648	93.3588	93.5246	89.9088	90.9894	91.1698	91.7569	92.4277	92.3777	95.5374	94.1216	93.5902	94.1056	92.2938	95.3909	97.3766	97.8345	96.9143	93.1723	93.387	93.5598	92.4226	94.8288	94.6403	86.2096	94.9833	93.19	95.5982	92.619	93.8372	91.603	92.2121	90.7214	92.2322	91.2293	89.4488	93.0934	97.3951	93.4418	96.4107	96.4925	96.4879	95.4862
2791.78	95.1663	94.8971	95.1331	95.9465	97.3615	97.282	93.397	93.5002	93.6589	90.0141	91.1437	91.2596	91.8826	92.5768	92.517	95.6017	94.2587	93.7237	94.1872	92.3823	95.4485	97.4395	97.8801	96.9879	93.3196	93.5696	93.7346	92.541	94.9386	94.7377	86.3632	95.0764	93.3759	95.7224	92.7834	94.001	91.7669	92.3223	90.9245	92.4055	91.3713	89.7121	93.2282	97.4325	93.5567	96.5144	96.5864	96.5863	95.5984
2789.91	95.4183	95.1451	95.3553	96.015	97.465	97.3219	93.5455	93.6851	93.8243	90.0786	91.2409	91.3488	91.999	92.7109	92.6775	95.6979	94.3904	93.8137	94.2508	92.4451	95.4898	97.5475	97.9639	97.0843	93.5123	93.7561	93.9258	92.6995	95.0143	94.8302	86.5388	95.129	93.5841	95.8616	92.9731	94.1625	91.9125	92.4481	91.1634	92.5924	91.6106	89.9868	93.3606	97.4739	93.7026	96.5919	96.6409	96.6955	95.6595
2788.05	95.639	95.425	95.5545	96.0619	97.5559	97.3786	93.7021	93.8414	94.0258	90.1672	91.3579	91.4561	92.1437	92.8371	92.8401	95.8205	94.4776	93.9056	94.3254	92.5465	95.5552	97.6021	97.9987	97.1701	93.6843	93.9603	94.1467	92.8446	95.0956	94.9349	86.6904	95.2558	93.7363	96.0421	93.175	94.3409	92.0484	92.5632	91.3424	92.8172	91.8681	90.2665	93.5498	97.549	93.8908	96.6715	96.6924	96.7853	95.7358
2786.18	95.8208	95.64	95.7947	96.1153	97.6327	97.4597	93.8443	93.9551	94.184	90.3025	91.4832	91.5657	92.3325	92.9608	93.0008	95.9245	94.5553	94.0262	94.4352	92.6621	95.6188	97.6438	98.0182	97.2785	93.8371	94.1514	94.3196	92.9341	95.2063	95.046	86.8319	95.3931	93.8409	96.2156	93.3836	94.4963	92.2081	92.6941	91.4837	93.0038	92.0582	90.4937	93.7362	97.6318	94.072	96.7315	96.8147	96.8805	95.8483
2784.32	95.9972	95.8364	96.0188	96.1928	97.653	97.5006	93.9834	94.1111	94.3097	90.4318	91.6295	91.6578	92.4502	93.0917	93.1257	96.0196	94.668	94.1649	94.5236	92.7732	95.6796	97.7032	98.0803	97.3613	93.969	94.2823	94.4553	93.0499	95.2968	95.1413	86.9891	95.4584	93.9884	96.3537	93.5214	94.6653	92.3367	92.8283	91.6363	93.1726	92.1937	90.6885	93.8671	97.6319	94.2432	96.7868	96.9306	96.9515	95.9558
2782.46	96.1756	95.9919	96.1851	96.2321	97.6662	97.5278	94.1149	94.2279	94.4568	90.5027	91.798	91.7584	92.5158	93.2341	93.228	96.1393	94.7908	94.296	94.5796	92.8338	95.7724	97.7474	98.1352	97.4023	94.0839	94.3992	94.5999	93.1933	95.4034	95.2115	87.139	95.52	94.1457	96.468	93.6482	94.8147	92.4603	92.957	91.7791	93.3371	92.3143	90.9259	93.9907	97.6365	94.3774	96.8705	97.0215	97.0164	96.007
2780.59	96.2962	96.1086	96.3313	96.2353	97.7261	97.5721	94.2221	94.33	94.5666	90.5576	91.8944	91.8876	92.6389	93.3281	93.351	96.2408	94.8719	94.3845	94.6456	92.9118	95.8429	97.7624	98.1483	97.4815	94.1939	94.5518	94.7264	93.3046	95.4474	95.2967	87.2711	95.5967	94.2754	96.5718	93.7713	94.9248	92.5838	93.082	91.8945	93.4745	92.4564	91.1662	94.0972	97.6921	94.4869	96.9639	97.0843	97.0992	96.0858
2778.73	96.3875	96.202	96.4534	96.2642	97.766	97.6354	94.3312	94.4377	94.6217	90.6374	91.9518	91.9865	92.7704	93.3904	93.4568	96.2876	94.9333	94.4401	94.676	93.0204	95.882	97.7977	98.196	97.5735	94.3154	94.6543	94.839	93.3673	95.4691	95.362	87.422	95.7142	94.3834	96.6305	93.8412	95.0222	92.6727	93.1674	92.0007	93.599	92.6422	91.378	94.2165	97.7498	94.5561	97.031	97.0939	97.1828	96.1648
2776.87	96.5075	96.3097	96.5317	96.2986	97.7838	97.6593	94.3991	94.505	94.6563	90.7125	92.0096	92.0348	92.8194	93.4495	93.5141	96.3042	95.0204	94.5019	94.7015	93.0912	95.8926	97.8554	98.2689	97.5701	94.4085	94.7135	94.926	93.4175	95.5472	95.3894	87.489	95.7748	94.4386	96.6979	93.9507	95.1303	92.7732	93.2506	92.1063	93.7382	92.7869	91.5459	94.3376	97.7456	94.5896	97.0593	97.1344	97.2014	96.2107
2775	96.5715	96.3954	96.5686	96.3359	97.8275	97.6132	94.4263	94.537	94.6945	90.7821	92.0618	92.0674	92.8473	93.506	93.5675	96.3373	95.0584	94.5802	94.7481	93.14	95.9072	97.8931	98.2878	97.5815	94.4742	94.782	94.9922	93.4588	95.6312	95.4475	87.5083	95.7918	94.5155	96.762	94.0545	95.1939	92.8865	93.3761	92.2502	93.8623	92.8871	91.7231	94.399	97.7536	94.6712	97.0561	97.1867	97.2094	96.2432
2773.14	96.6218	96.4597	96.6306	96.386	97.8751	97.6044	94.44	94.571	94.7623	90.8509	92.1613	92.089	92.9037	93.5811	93.6253	96.3688	95.1041	94.6403	94.8178	93.1813	95.9437	97.9155	98.296	97.6313	94.5584	94.8376	95.0712	93.5331	95.6496	95.4862	87.5962	95.8247	94.5876	96.8216	94.0981	95.2165	92.9774	93.4735	92.3826	93.9818	92.9792	91.8836	94.4501	97.8126	94.7512	97.0678	97.2034	97.2469	96.2703
2771.27	96.6758	96.5071	96.683	96.4246	97.8949	97.6321	94.4894	94.6294	94.836	90.9031	92.2566	92.1495	92.9582	93.6609	93.6912	96.3947	95.1599	94.6608	94.8906	93.2117	95.9477	97.9516	98.3394	97.6794	94.6017	94.8875	95.1286	93.6306	95.6623	95.5268	87.6235	95.8559	94.6233	96.8732	94.1899	95.2333	93.0633	93.5207	92.4776	94.0972	93.1315	92.0241	94.4751	97.838	94.7912	97.1074	97.2075	97.2248	96.3203
2769.41	96.6861	96.5472	96.7475	96.4428	97.8724	97.6563	94.5305	94.687	94.8832	90.9807	92.3007	92.2284	93.0275	93.712	93.7516	96.4284	95.1652	94.6481	94.9069	93.2061	95.969	97.95	98.3608	97.7183	94.6063	94.953	95.1716	93.6623	95.6806	95.5574	87.6191	95.8662	94.6607	96.9017	94.2421	95.301	93.1518	93.5911	92.5907	94.2291	93.2867	92.1817	94.5134	97.8474	94.8444	97.1329	97.2271	97.2366	96.3244
2767.55	96.7077	96.573	96.7974	96.4449	97.8822	97.6809	94.5734	94.7155	94.9115	91.0262	92.3649	92.2936	93.0755	93.7413	93.7832	96.4056	95.1812	94.6555	94.9132	93.1911	95.9976	97.9304	98.3607	97.7359	94.6349	94.9935	95.2178	93.648	95.7127	95.5595	87.6852	95.8706	94.6804	96.9388	94.2562	95.4102	93.2227	93.6743	92.7026	94.3482	93.3773	92.3771	94.6013	97.8478	94.9139	97.1375	97.2831	97.289	96.3114
2765.68	96.7597	96.6093	96.7571	96.4647	97.9157	97.6867	94.6245	94.7367	94.9502	91.0758	92.4049	92.3425	93.0576	93.7804	93.7688	96.4138	95.2258	94.7225	94.9783	93.262	95.9978	97.9887	98.3409	97.7215	94.6644	95.0243	95.2445	93.6613	95.7502	95.5982	87.729	95.8743	94.7045	96.9572	94.3149	95.4486	93.2507	93.7297	92.8059	94.4236	93.4551	92.5042	94.6561	97.8579	94.9201	97.2028	97.2939	97.3329	96.3238
2763.82	96.8007	96.6504	96.7858	96.4935	97.9071	97.7166	94.6535	94.7844	95.0095	91.1332	92.429	92.3923	93.1018	93.8421	93.7873	96.5018	95.2631	94.7793	95.0232	93.3126	96.0164	98.0064	98.3649	97.7241	94.729	95.1108	95.2855	93.7094	95.7413	95.6425	87.7772	95.9219	94.7576	96.9695	94.3673	95.4389	93.3439	93.7921	92.8842	94.5136	93.5441	92.5946	94.665	97.8846	94.9682	97.2526	97.268	97.3878	96.3658
2761.96	96.8416	96.6958	96.863	96.4919	97.889	97.7274	94.6987	94.8541	95.0386	91.1917	92.5063	92.4638	93.2205	93.8727	93.8449	96.5683	95.2644	94.7697	95.027	93.3294	96.0654	97.9746	98.3986	97.7727	94.824	95.2011	95.34	93.7439	95.7229	95.6369	87.8587	95.9629	94.8203	97.005	94.3946	95.4617	93.4652	93.8886	92.931	94.6148	93.648	92.7109	94.6816	97.9057	95.0181	97.2445	97.2855	97.4048	96.4327
2760.09	96.8714	96.7418	96.952	96.5044	97.9267	97.7315	94.783	94.9082	95.1113	91.2143	92.5155	92.5103	93.283	93.867	93.9137	96.6241	95.2752	94.7935	95.0393	93.3935	96.0954	98.0172	98.3851	97.8319	94.8871	95.2268	95.385	93.8125	95.7533	95.6523	87.9118	95.9694	94.8706	97.0849	94.4375	95.5504	93.5066	93.9657	92.9708	94.6843	93.7587	92.8153	94.7216	97.9173	95.0413	97.2616	97.3613	97.3725	96.4904
2758.23	96.942	96.7804	97.0016	96.5299	97.991	97.7668	94.8458	94.9676	95.2115	91.2448	92.5501	92.5467	93.3207	93.9412	94.0052	96.6499	95.3489	94.8936	95.0464	93.4725	96.0922	98.0497	98.3804	97.8524	94.936	95.252	95.4572	93.8781	95.8082	95.6873	87.9445	96.0369	94.9343	97.1606	94.5155	95.6169	93.5404	94.0041	93.0486	94.7014	93.8509	92.8972	94.8161	97.9394	95.1011	97.2725	97.3711	97.3636	96.5251
2756.37	97.0983	96.8839	97.0726	96.5655	98.059	97.7975	94.905	95.0402	95.2703	91.3387	92.6416	92.5981	93.4362	94.0803	94.0995	96.6794	95.4538	94.9687	95.0876	93.5272	96.1034	98.0603	98.4577	97.8789	95.0239	95.3574	95.5862	93.962	95.8807	95.7647	88.0774	96.1549	95.0145	97.2371	94.6235	95.6823	93.6281	94.0395	93.1477	94.7708	93.9089	93.0063	94.923	97.9939	95.2261	97.3248	97.3774	97.4545	96.5639
2754.5	97.2024	97.053	97.1957	96.6123	98.1213	97.8212	94.9839	95.1401	95.3168	91.4303	92.7323	92.6784	93.5337	94.1567	94.1846	96.7676	95.5435	95.0345	95.1781	93.5546	96.1501	98.0868	98.5171	97.9456	95.1466	95.4951	95.6934	94.0253	95.9611	95.87	88.2091	96.2183	95.0736	97.312	94.7235	95.7569	93.6958	94.0995	93.2248	94.906	93.9562	93.1225	95.0289	98.0343	95.34	97.404	97.4622	97.5812	96.6193
2752.64	97.2656	97.1571	97.2708	96.6397	98.1295	97.8378	95.0548	95.2095	95.382	91.4651	92.7897	92.7016	93.5718	94.2114	94.2576	96.8419	95.5872	95.11	95.2312	93.5981	96.2042	98.1388	98.5293	98.0158	95.2536	95.5867	95.741	94.0774	96.0426	95.9353	88.23	96.2174	95.1443	97.3439	94.7702	95.8256	93.7376	94.1525	93.2603	94.97	94.0165	93.2084	95.1085	98.0546	95.363	97.4226	97.5425	97.6149	96.684
2750.77	97.3069	97.1584	97.3019	96.6537	98.1118	97.8545	95.0912	95.2278	95.4487	91.4987	92.7977	92.69	93.58	94.2602	94.2965	96.8675	95.5984	95.1125	95.2875	93.6266	96.2196	98.1942	98.5372	98.0276	95.2785	95.6184	95.7552	94.1194	96.0829	95.9424	88.2504	96.2512	95.1891	97.3502	94.8046	95.8747	93.7807	94.1899	93.2958	94.9674	94.0682	93.2705	95.107	98.0527	95.3661	97.4335	97.5185	97.6089	96.7107
2748.91	97.2917	97.1191	97.3292	96.651	98.1138	97.8819	95.1108	95.2564	95.4897	91.4578	92.8263	92.6886	93.5936	94.2593	94.3288	96.8485	95.6257	95.1308	95.3139	93.6526	96.2266	98.1684	98.531	98.0015	95.2674	95.6387	95.7848	94.1237	96.0617	95.9164	88.2711	96.2769	95.2191	97.347	94.8256	95.889	93.8239	94.2342	93.353	95.0068	94.1321	93.3645	95.0683	98.0398	95.3895	97.4529	97.4933	97.6122	96.6811
2747.05	97.2833	97.1246	97.3524	96.6496	98.1164	97.8765	95.1387	95.2844	95.4845	91.4515	92.8671	92.6867	93.6111	94.241	94.3301	96.8326	95.6526	95.1933	95.3084	93.6838	96.2466	98.1256	98.5279	97.9773	95.2786	95.63	95.822	94.1576	96.0514	95.9349	88.2591	96.2508	95.2548	97.3891	94.8281	95.8995	93.8318	94.2455	93.4076	95.0875	94.19	93.4481	95.0997	98.0365	95.4147	97.4233	97.565	97.6087	96.69
2745.18	97.2873	97.1204	97.2948	96.6646	98.1448	97.8651	95.1552	95.2882	95.4751	91.5341	92.8899	92.7315	93.6175	94.2536	94.3178	96.8633	95.638	95.194	95.2896	93.6785	96.2553	98.1487	98.5666	97.9942	95.3038	95.5938	95.852	94.191	96.0435	95.9935	88.2562	96.2462	95.2856	97.3997	94.8567	95.8861	93.859	94.2786	93.434	95.1472	94.2259	93.4869	95.1339	98.0838	95.4353	97.4042	97.5901	97.639	96.7092
2743.32	97.2361	97.054	97.2477	96.6787	98.1646	97.8576	95.1316	95.2677	95.4988	91.5738	92.9005	92.778	93.6171	94.2682	94.3638	96.875	95.5954	95.1688	95.2907	93.6695	96.2574	98.1806	98.5554	98.0341	95.3192	95.5923	95.851	94.1863	96.055	96.0181	88.2575	96.2643	95.2485	97.3869	94.8508	95.8145	93.9136	94.3557	93.4561	95.1585	94.2397	93.4936	95.1077	98.0601	95.432	97.3891	97.5624	97.6774	96.6797
2741.46	97.1121	96.9982	97.1909	96.683	98.1455	97.8351	95.0841	95.2457	95.5003	91.5447	92.9142	92.7734	93.6007	94.2582	94.3596	96.8333	95.5626	95.1435	95.2956	93.6709	96.2821	98.1724	98.5173	98.0365	95.2527	95.5719	95.7616	94.1616	96.0708	96.0087	88.2244	96.2362	95.1652	97.3782	94.8	95.7464	93.9767	94.3857	93.4974	95.1891	94.2726	93.5862	95.0577	98.0149	95.3755	97.4076	97.5691	97.6108	96.6835
2739.59	96.9868	96.9157	97.0644	96.6562	98.0938	97.847	95.0302	95.1602	95.4289	91.553	92.8868	92.7845	93.561	94.2037	94.2603	96.7948	95.5534	95.0816	95.2771	93.6521	96.2962	98.1153	98.494	97.9753	95.1652	95.4934	95.6566	94.1024	96.007	95.9442	88.1585	96.1837	95.0943	97.3188	94.7079	95.6939	94.0367	94.4049	93.5201	95.2616	94.3032	93.6702	95.0051	98.0073	95.3066	97.4	97.5252	97.5567	96.6583
2737.73	96.8854	96.7958	96.9318	96.6169	98.0419	97.8576	94.9731	95.0895	95.3507	91.5316	92.8597	92.773	93.5361	94.1649	94.1896	96.7604	95.5457	95.0014	95.233	93.6048	96.2408	98.1029	98.48	97.8893	95.1435	95.4302	95.6104	94.0442	95.9353	95.8745	88.1559	96.1544	95.0687	97.1762	94.6433	95.6697	94.0471	94.4161	93.5472	95.3068	94.3698	93.6949	94.965	98.0331	95.2421	97.3575	97.4413	97.5274	96.5537
2735.87	96.7881	96.6976	96.8641	96.6092	97.9915	97.835	94.9405	95.0635	95.2963	91.5169	92.8526	92.773	93.5323	94.1605	94.1459	96.7178	95.5272	94.9993	95.1912	93.5471	96.1741	98.1076	98.4769	97.8583	95.1134	95.38	95.5721	94.0046	95.9357	95.8071	88.1253	96.1081	95.0182	97.1061	94.6117	95.6243	94.0636	94.4465	93.6212	95.3202	94.4487	93.7413	94.9061	98.0235	95.1659	97.329	97.4402	97.4545	96.5381
2734	96.7157	96.5916	96.8071	96.6316	97.9494	97.8161	94.9038	95.021	95.2792	91.5384	92.8148	92.7973	93.4914	94.1476	94.14	96.6512	95.4867	95.0321	95.1807	93.5461	96.1752	98.0856	98.4855	97.8577	95.0479	95.3093	95.5154	93.9732	95.9462	95.7811	88.0137	96.084	94.9266	97.0944	94.5934	95.5349	94.0754	94.5153	93.6563	95.3523	94.4568	93.8182	94.8669	97.9833	95.1101	97.2605	97.4007	97.425	96.5636
2732.14	96.6451	96.457	96.675	96.6069	97.9203	97.8022	94.8453	94.9649	95.2698	91.5604	92.8236	92.8077	93.4075	94.1028	94.1419	96.5645	95.445	94.9961	95.1772	93.5506	96.1811	98.0571	98.4479	97.828	94.982	95.223	95.4242	93.9527	95.8918	95.7786	87.9504	96.0665	94.8578	97.0554	94.5087	95.4766	94.076	94.5466	93.6971	95.398	94.4829	93.8719	94.8014	97.9748	95.0756	97.2172	97.3045	97.3853	96.5218
2730.27	96.4992	96.3316	96.5215	96.5573	97.8822	97.7506	94.7567	94.8901	95.2216	91.5575	92.8348	92.7837	93.3524	94.0304	94.099	96.5153	95.3976	94.9126	95.1326	93.5362	96.1248	98.009	98.3971	97.741	94.9012	95.1138	95.2899	93.9119	95.8424	95.7379	87.889	96.0478	94.7708	96.9697	94.3888	95.4137	94.1202	94.572	93.7695	95.4723	94.5869	93.9421	94.6896	97.9726	94.9969	97.1977	97.277	97.3312	96.4272
2728.41	96.3082	96.1637	96.3493	96.5176	97.8556	97.6937	94.6795	94.8091	95.117	91.5018	92.8021	92.7704	93.3071	93.9525	94.0051	96.4807	95.2922	94.8206	95.0479	93.4862	96.0766	97.9599	98.3762	97.6341	94.7795	94.9883	95.1556	93.8301	95.8145	95.6461	87.7702	95.9882	94.6542	96.8681	94.2612	95.2826	94.1701	94.5914	93.8042	95.5337	94.6399	94.0279	94.5967	97.9314	94.8759	97.1397	97.2377	97.2715	96.332
2726.55	96.1457	95.983	96.1565	96.483	97.8348	97.677	94.5792	94.7289	94.9902	91.4745	92.8059	92.8014	93.2464	93.8838	93.9052	96.4237	95.2059	94.7468	94.9768	93.4163	96.0924	97.9295	98.359	97.5663	94.6596	94.8702	95.0527	93.754	95.7651	95.5885	87.6858	95.89	94.563	96.7591	94.1269	95.0934	94.2194	94.6	93.8421	95.5749	94.6641	94.102	94.4785	97.8779	94.7647	97.0912	97.1059	97.2025	96.2815
2724.68	96.0554	95.8889	96.047	96.4488	97.8182	97.6487	94.4699	94.6699	94.9002	91.4688	92.7938	92.8133	93.1809	93.8304	93.8307	96.3687	95.169	94.7178	94.9564	93.368	96.0733	97.8995	98.2912	97.5416	94.6061	94.8271	94.9607	93.7184	95.7301	95.5762	87.646	95.8047	94.5194	96.6807	94.0648	95.0076	94.2663	94.6323	93.8761	95.6168	94.6981	94.1441	94.3896	97.8338	94.7142	97.0403	97.0717	97.1377	96.2678
2722.82	96.0491	95.8968	96.0778	96.4351	97.8097	97.6673	94.471	94.6634	94.9278	91.4559	92.7721	92.8041	93.1803	93.8163	93.8315	96.3776	95.1438	94.743	94.9686	93.3575	96.0014	97.882	98.2654	97.5649	94.6338	94.8774	94.9642	93.7114	95.7404	95.5867	87.6659	95.7828	94.5221	96.6873	94.0586	95.0462	94.3177	94.6994	93.9192	95.6096	94.7329	94.1493	94.422	97.8514	94.7574	97.0105	97.1325	97.1554	96.2783
2720.96	96.1418	96.0191	96.21	96.4751	97.8285	97.7252	94.612	94.7621	95.0482	91.4806	92.7952	92.8067	93.2662	93.8976	93.9086	96.4373	95.2021	94.812	95.0509	93.4019	96.0152	97.9201	98.2691	97.6126	94.7078	94.973	95.095	93.771	95.7985	95.6438	87.7856	95.8378	94.5919	96.7636	94.1398	95.1509	94.3593	94.7597	93.9649	95.6327	94.7749	94.1642	94.5302	97.9342	94.8377	97.0512	97.1975	97.2768	96.3059
2719.09	96.2977	96.2074	96.3785	96.5182	97.8756	97.7571	94.7378	94.9002	95.1337	91.5359	92.8203	92.8226	93.3803	94.0073	94.0261	96.485	95.3156	94.8936	95.155	93.5056	96.099	97.9732	98.3364	97.7092	94.8387	95.091	95.2467	93.9053	95.8682	95.6829	87.9065	95.9674	94.6904	96.8608	94.2881	95.3206	94.3739	94.7905	93.9899	95.6555	94.8469	94.2589	94.6583	97.9493	94.9247	97.1217	97.2558	97.3378	96.3735
2717.23	96.4894	96.3966	96.5704	96.5366	97.9394	97.755	94.8103	94.9924	95.2507	91.5859	92.8924	92.8852	93.4882	94.0962	94.1389	96.5361	95.4099	94.9579	95.1811	93.6106	96.1662	97.9964	98.4069	97.7792	94.9651	95.2091	95.379	94.0153	95.9165	95.7423	87.9953	96.0435	94.8224	96.9975	94.4341	95.4331	94.3712	94.8144	94.0379	95.7294	94.8985	94.3481	94.7749	97.9372	95.0603	97.1917	97.2962	97.3821	96.4769
2715.36	96.6758	96.5403	96.7152	96.5789	98.0089	97.7798	94.8915	95.0611	95.3602	91.6495	92.9776	92.9529	93.5785	94.1883	94.2214	96.6318	95.4967	95.0545	95.2404	93.6659	96.2248	98.0698	98.4016	97.8102	95.0757	95.3169	95.5033	94.0658	95.9298	95.8521	88.0941	96.0789	94.9814	97.1284	94.5706	95.528	94.3703	94.831	94.0982	95.8047	94.9197	94.4028	94.8829	97.9871	95.1981	97.2468	97.3614	97.4806	96.5496
2713.5	96.8015	96.6859	96.837	96.6112	98.028	97.8024	95.0067	95.178	95.43	91.7093	93.0542	93.0112	93.6533	94.2721	94.3091	96.7361	95.5601	95.1525	95.3304	93.6914	96.245	98.149	98.4341	97.9116	95.1903	95.4249	95.6299	94.0862	95.9621	95.9076	88.1609	96.1425	95.103	97.208	94.6975	95.6448	94.4217	94.8231	94.1091	95.8508	94.9142	94.448	94.9872	98.0353	95.266	97.3277	97.4481	97.5114	96.5987
2711.64	96.925	96.8313	96.9506	96.6056	98.0581	97.813	95.0922	95.3029	95.4945	91.7558	93.0543	93.0277	93.7241	94.3426	94.3982	96.7889	95.6447	95.1867	95.3458	93.7331	96.2484	98.1599	98.5171	97.996	95.2861	95.5259	95.7357	94.1447	96.0186	95.9392	88.2058	96.217	95.1866	97.2694	94.8147	95.7391	94.4874	94.8294	94.1472	95.858	95.0089	94.4897	95.0708	98.0698	95.3441	97.3983	97.4951	97.5003	96.6316
2709.77	97.0516	96.922	97.0829	96.6115	98.0933	97.8466	95.196	95.3692	95.5846	91.7819	93.1073	93.082	93.7623	94.3973	94.4756	96.8249	95.727	95.2339	95.3614	93.8043	96.2777	98.1807	98.5553	98.0132	95.357	95.5954	95.805	94.2284	96.066	96.0054	88.2932	96.2679	95.2442	97.3607	94.8675	95.8285	94.4953	94.8934	94.201	95.8474	95.0512	94.5115	95.1506	98.0614	95.435	97.4448	97.4868	97.567	96.6752
2707.91	97.1718	96.994	97.1692	96.6458	98.0859	97.8797	95.2576	95.4051	95.636	91.8065	93.1665	93.1508	93.7936	94.4333	94.5439	96.8964	95.7439	95.2976	95.4241	93.8512	96.2989	98.1826	98.5732	98.0196	95.4219	95.6572	95.8865	94.2725	96.1053	96.0558	88.3869	96.296	95.2623	97.4137	94.8859	95.8858	94.4957	94.9193	94.2301	95.9035	95.0225	94.5469	95.2201	98.0562	95.4966	97.4843	97.5275	97.6464	96.7772
2706.05	97.2618	97.1089	97.2457	96.68	98.1047	97.9073	95.276	95.4474	95.6922	91.844	93.2157	93.1818	93.8328	94.4679	94.5762	96.9743	95.7818	95.3115	95.4651	93.8632	96.3346	98.1744	98.6055	98.0761	95.5103	95.7626	95.9711	94.2962	96.1511	96.0594	88.4589	96.3339	95.3096	97.4318	94.9262	95.9308	94.5627	94.9054	94.2505	95.9731	95.0686	94.5774	95.2856	98.1072	95.5658	97.4974	97.5658	97.659	96.8469
2704.18	97.3121	97.1535	97.3458	96.7142	98.1736	97.9393	95.3062	95.4987	95.7369	91.8762	93.2893	93.2085	93.9094	94.562	94.5816	97.0199	95.8331	95.3287	95.4735	93.8932	96.3802	98.2304	98.6349	98.1183	95.5823	95.8424	96.0156	94.346	96.2084	96.0483	88.5182	96.3761	95.4147	97.5011	94.9916	95.9825	94.5903	94.9313	94.2605	96.0126	95.1143	94.6106	95.3207	98.1415	95.6132	97.5403	97.5694	97.6804	96.8519
2702.32	97.3449	97.1927	97.3734	96.7501	98.2065	97.9418	95.3414	95.5394	95.7894	91.9012	93.3414	93.205	93.9628	94.6393	94.6028	97.0055	95.8275	95.3886	95.5152	93.9237	96.4036	98.2737	98.6713	98.1322	95.6273	95.8868	96.0362	94.4095	96.2136	96.0399	88.544	96.3878	95.47	97.5612	95.0312	96.0234	94.566	94.9586	94.2488	96.0306	95.153	94.667	95.3132	98.1177	95.6262	97.5787	97.5831	97.722	96.8651
2700.46	97.3769	97.2636	97.4028	96.7869	98.2201	97.9122	95.4039	95.5869	95.8568	91.9311	93.3608	93.2041	93.9348	94.627	94.6709	96.99	95.8623	95.4393	95.577	93.9308	96.4204	98.2703	98.6938	98.18	95.6688	95.9455	96.0999	94.4554	96.2037	96.0852	88.5136	96.4273	95.4772	97.5659	95.1077	96.0521	94.5807	94.9844	94.2614	96.0335	95.1742	94.7378	95.3387	98.1288	95.6563	97.5607	97.6193	97.734	96.8649
2698.59	97.425	97.3187	97.5065	96.7915	98.2433	97.9282	95.4258	95.6178	95.8767	91.9852	93.3484	93.2322	93.9351	94.6337	94.7214	97.0115	95.9137	95.4566	95.5825	93.9491	96.4104	98.2671	98.6837	98.1973	95.6828	95.9574	96.165	94.4561	96.2062	96.1363	88.5332	96.4356	95.4902	97.5959	95.1355	96.1221	94.6459	95.0199	94.3007	96.0466	95.1993	94.8026	95.4206	98.1798	95.7063	97.57	97.672	97.7236	96.8713
2696.73	97.4618	97.304	97.5444	96.7597	98.2461	97.9853	95.4149	95.6094	95.85	92.0197	93.3723	93.2587	93.9818	94.7202	94.7572	97.052	95.8812	95.4727	95.557	93.9852	96.4285	98.2924	98.6951	98.1573	95.7031	95.9597	96.2025	94.4453	96.2229	96.1475	88.5891	96.4178	95.5263	97.6451	95.1393	96.1279	94.7139	95.042	94.3747	96.09	95.2412	94.811	95.4824	98.1872	95.7426	97.6138	97.6856	97.7299	96.9218
2694.86	97.454	97.2828	97.531	96.7314	98.2464	97.9674	95.4646	95.6523	95.8612	92.0092	93.4258	93.2863	94.0329	94.7599	94.777	97.0861	95.8513	95.4729	95.5736	94.0083	96.4442	98.3185	98.7026	98.128	95.7435	95.9737	96.2309	94.4745	96.234	96.168	88.591	96.4387	95.5378	97.6395	95.1602	96.1432	94.7224	95.0347	94.4087	96.1403	95.2567	94.8305	95.5198	98.1394	95.7843	97.6314	97.6864	97.7427	96.9569
2693	97.4441	97.3042	97.5437	96.7475	98.2788	97.9459	95.5082	95.7078	95.8779	91.9647	93.4701	93.2897	94.0859	94.7439	94.7792	97.0798	95.901	95.456	95.5673	93.9834	96.4109	98.2873	98.6578	98.1573	95.7445	95.9813	96.2292	94.481	96.2381	96.1483	88.5864	96.4846	95.5604	97.5988	95.22	96.1815	94.7026	95.0315	94.3905	96.152	95.2762	94.9113	95.5363	98.1271	95.7921	97.6158	97.7037	97.7515	96.914
2691.14	97.4866	97.3581	97.5214	96.7803	98.3063	97.9693	95.5088	95.6993	95.8764	91.9861	93.4477	93.2804	94.1081	94.7285	94.7806	97.0814	95.9416	95.4593	95.5908	94.0064	96.4097	98.2555	98.6609	98.1738	95.711	96.0029	96.2234	94.4588	96.2321	96.1314	88.5784	96.4846	95.5841	97.5704	95.2305	96.172	94.6926	95.0647	94.3907	96.1448	95.3384	94.9451	95.5511	98.1716	95.7738	97.6077	97.7318	97.7547	96.8938
2689.27	97.5011	97.4083	97.4848	96.8129	98.2982	97.9741	95.4965	95.6917	95.8726	92.0311	93.4369	93.2834	94.0713	94.6812	94.7778	97.09	95.9427	95.4642	95.6445	94.0741	96.4439	98.2869	98.6997	98.1763	95.7241	96.0171	96.2437	94.4804	96.2442	96.1355	88.5813	96.4743	95.5595	97.5956	95.1805	96.1496	94.687	95.0911	94.4068	96.1811	95.3436	94.9598	95.5636	98.1734	95.7979	97.6299	97.7371	97.7703	96.9194
2687.41	97.5105	97.3886	97.5042	96.8258	98.3023	97.9584	95.4935	95.7143	95.9217	92.0558	93.4932	93.3396	94.0744	94.695	94.7686	97.0833	95.9531	95.4823	95.6317	94.0988	96.4633	98.3142	98.7289	98.1834	95.7608	96.0422	96.2455	94.5101	96.2581	96.1456	88.5943	96.491	95.5631	97.6406	95.1873	96.1623	94.692	95.1019	94.4101	96.214	95.3307	94.9399	95.5499	98.1622	95.82	97.6111	97.7163	97.7796	96.9528
2685.55	97.5271	97.3457	97.5338	96.812	98.3054	97.9644	95.5243	95.732	95.9696	92.0492	93.5241	93.3944	94.1065	94.7637	94.7553	97.0988	95.9626	95.5062	95.5964	94.0871	96.4718	98.3124	98.7463	98.1787	95.7758	96.0767	96.2505	94.5043	96.2938	96.1942	88.6093	96.5289	95.5712	97.6841	95.2086	96.1651	94.6788	95.1092	94.4407	96.2202	95.3542	94.9463	95.5445	98.1554	95.8341	97.6019	97.7156	97.7863	96.975
2683.68	97.4909	97.3735	97.5272	96.8042	98.276	97.9803	95.5315	95.7571	95.9775	92.0577	93.5296	93.3731	94.1009	94.7864	94.7742	97.1143	95.9307	95.5192	95.6101	94.0584	96.4885	98.299	98.7298	98.2018	95.791	96.0924	96.2536	94.4944	96.3301	96.2023	88.6357	96.5396	95.5784	97.6476	95.2028	96.1749	94.6789	95.1173	94.4606	96.1872	95.3544	94.9788	95.55	98.1606	95.8228	97.6436	97.7304	97.7901	96.9668
2681.82	97.4817	97.4033	97.5617	96.7958	98.2767	97.9663	95.5706	95.777	95.9954	92.0735	93.5073	93.3601	94.0935	94.7418	94.8319	97.1209	95.9289	95.5212	95.6356	94.0308	96.4935	98.2799	98.7488	98.2165	95.8067	96.0667	96.2475	94.4769	96.292	96.1845	88.6529	96.5159	95.6047	97.6274	95.1902	96.1928	94.7227	95.1373	94.4759	96.1953	95.3326	94.9933	95.569	98.1705	95.8067	97.6411	97.7205	97.8259	96.939
2679.96	97.5217	97.3826	97.5981	96.7771	98.2891	97.9377	95.5844	95.7623	95.9959	92.0756	93.4968	93.3851	94.0616	94.7242	94.8463	97.1005	95.9541	95.5223	95.6281	94.0471	96.4671	98.2597	98.7505	98.2089	95.8006	96.0184	96.2781	94.5033	96.2325	96.1935	88.6235	96.4957	95.5903	97.6358	95.1964	96.1942	94.7698	95.1097	94.4782	96.2365	95.3579	95.0127	95.5664	98.1653	95.7953	97.6294	97.7165	97.8226	96.9259
2678.09	97.5188	97.3948	97.5669	96.7861	98.2791	97.949	95.5509	95.7487	96.018	92.0503	93.4935	93.3733	94.0469	94.7301	94.8098	97.0759	95.9317	95.5294	95.6217	94.0666	96.4486	98.3056	98.7218	98.1954	95.7961	96.0254	96.3058	94.5272	96.2457	96.2059	88.5727	96.491	95.5982	97.6253	95.2028	96.1603	94.7931	95.0796	94.4367	96.2247	95.3475	94.9898	95.5298	98.1486	95.7988	97.618	97.721	97.7651	96.9494
2676.23	97.5097	97.4154	97.5302	96.7917	98.2719	97.9549	95.5865	95.7458	96.0356	92.0454	93.5075	93.3656	94.0948	94.7502	94.7936	97.0834	95.9135	95.5298	95.6521	94.0715	96.4477	98.3627	98.7181	98.1862	95.8034	96.0971	96.2932	94.5301	96.2649	96.2258	88.5535	96.5252	95.611	97.6323	95.215	96.1804	94.7711	95.0653	94.4083	96.2153	95.356	94.9466	95.5204	98.1879	95.8234	97.6099	97.7144	97.7662	96.9748
2674.36	97.5279	97.403	97.5137	96.7991	98.2809	97.9392	95.6052	95.7401	96.0213	92.0403	93.5349	93.3426	94.1603	94.7906	94.8049	97.1064	95.9497	95.5427	95.6913	94.0502	96.446	98.3312	98.7287	98.2116	95.84	96.141	96.2808	94.5427	96.2639	96.2314	88.5824	96.5773	95.6029	97.6505	95.2222	96.2195	94.7164	95.0811	94.4217	96.2011	95.3419	94.97	95.5489	98.2078	95.876	97.6294	97.7124	97.8031	97.0037
2672.5	97.5609	97.4291	97.5431	96.8148	98.3057	97.941	95.5873	95.7789	96.0376	92.0538	93.5582	93.3604	94.2084	94.7951	94.8089	97.0979	96.002	95.5537	95.6815	94.0518	96.4523	98.2789	98.7274	98.2275	95.8827	96.1276	96.2908	94.5603	96.2893	96.1986	88.6018	96.5835	95.6086	97.6803	95.2334	96.1924	94.711	95.0743	94.4551	96.1681	95.2982	94.9772	95.5838	98.187	95.8839	97.6306	97.7205	97.7937	96.9884
2670.64	97.5403	97.44	97.5957	96.7897	98.299	97.9381	95.5737	95.8253	96.0587	92.0815	93.5623	93.4155	94.1968	94.7904	94.8119	97.0916	96.0207	95.5494	95.6545	94.0768	96.4878	98.306	98.7412	98.2269	95.8903	96.0982	96.3254	94.5734	96.3149	96.193	88.6108	96.5383	95.6049	97.6661	95.259	96.2074	94.7336	95.0591	94.4705	96.1619	95.3277	94.9177	95.6003	98.1822	95.8738	97.6373	97.7358	97.8208	96.9837
2668.77	97.5108	97.4291	97.5916	96.7605	98.2796	97.9463	95.5885	95.8267	96.064	92.1096	93.5593	93.4607	94.1517	94.7977	94.8248	97.0988	95.9956	95.5494	95.6803	94.0829	96.5099	98.3216	98.7619	98.2492	95.8594	96.086	96.3326	94.5716	96.2892	96.2324	88.6001	96.5079	95.5967	97.6729	95.2586	96.2241	94.7417	95.0477	94.449	96.1491	95.3425	94.8474	95.6116	98.208	95.8814	97.594	97.7144	97.807	96.9952
2666.91	97.5344	97.3953	97.5916	96.7717	98.2943	97.9676	95.6433	95.7949	96.0861	92.0951	93.5444	93.4547	94.1305	94.794	94.8621	97.079	95.9641	95.5567	95.718	94.0932	96.5025	98.2906	98.7462	98.2491	95.8305	96.0707	96.3054	94.5547	96.2796	96.2405	88.611	96.4874	95.6333	97.6939	95.2446	96.205	94.716	95.0614	94.4179	96.1153	95.2785	94.8096	95.6185	98.1832	95.8839	97.6132	97.716	97.785	96.9872
2665.05	97.5441	97.3667	97.5817	96.7529	98.2958	97.9494	95.6475	95.7797	96.1006	92.0769	93.531	93.414	94.1235	94.7872	94.8755	97.0585	95.9275	95.5561	95.7184	94.1042	96.4854	98.2774	98.6993	98.1961	95.8261	96.0639	96.2862	94.5264	96.2799	96.1984	88.6196	96.5075	95.6304	97.7055	95.2373	96.2126	94.6546	95.0202	94.3884	96.0739	95.2504	94.7728	95.5877	98.1532	95.8641	97.6293	97.6984	97.7816	97.0121
2663.18	97.5291	97.3628	97.5461	96.6989	98.2648	97.9031	95.6125	95.7788	96.0599	92.0585	93.5175	93.4081	94.1124	94.7683	94.8356	97.0448	95.9014	95.535	95.7153	94.076	96.4729	98.2794	98.691	98.1536	95.8084	96.056	96.2697	94.5567	96.2611	96.161	88.5633	96.5203	95.5752	97.6813	95.2119	96.2083	94.6411	94.9523	94.3514	96.0444	95.2699	94.7415	95.5799	98.1478	95.8312	97.5749	97.6374	97.7347	96.9899
2661.32	97.5303	97.3605	97.5445	96.6902	98.2616	97.9094	95.6055	95.7687	96.0078	92.0248	93.528	93.3994	94.0944	94.7356	94.8171	97.0293	95.9028	95.5137	95.6697	94.0504	96.4681	98.2665	98.6977	98.1148	95.7764	96.021	96.2525	94.5429	96.2369	96.1465	88.5156	96.4977	95.5673	97.6356	95.1821	96.1868	94.6429	94.981	94.3433	96.0262	95.2678	94.7346	95.6092	98.1875	95.82	97.5234	97.6541	97.7448	96.9659
2659.45	97.5455	97.3643	97.5472	96.7179	98.2729	97.9315	95.5961	95.7567	96.0293	92.0087	93.5372	93.3599	94.0647	94.7455	94.8169	97.0438	95.8931	95.5082	95.6124	94.0593	96.4816	98.2278	98.6761	98.1159	95.7952	96.0152	96.283	94.473	96.2367	96.1494	88.5331	96.5152	95.5691	97.6041	95.1786	96.2087	94.5871	95.0184	94.3362	96.0282	95.2127	94.7192	95.5969	98.2018	95.8539	97.4876	97.6456	97.7522	96.9944
2657.59	97.5176	97.3852	97.5489	96.7111	98.2444	97.8918	95.5931	95.7614	96.0625	92.0045	93.5356	93.3577	94.0669	94.7315	94.8087	97.0767	95.8628	95.5115	95.6154	94.0622	96.4976	98.1995	98.6513	98.1421	95.8239	96.0482	96.3058	94.454	96.2448	96.1808	88.5365	96.5584	95.5657	97.6005	95.2057	96.2421	94.5638	94.9982	94.3282	95.9858	95.1602	94.6845	95.5638	98.1546	95.854	97.4994	97.6143	97.7342	97.0127
2655.73	97.5219	97.3848	97.5887	96.7138	98.2043	97.8781	95.6095	95.7808	96.0616	91.9922	93.5145	93.3618	94.0969	94.7167	94.8152	97.0988	95.8707	95.5273	95.6064	94.0435	96.4665	98.2374	98.6394	98.1641	95.8348	96.0937	96.2949	94.4833	96.2418	96.1813	88.5599	96.5579	95.5496	97.6325	95.2141	96.2549	94.5829	94.9621	94.3343	95.9648	95.1829	94.6872	95.5738	98.1433	95.8621	97.5383	97.6461	97.6881	97.0152
2653.86	97.5981	97.3997	97.5867	96.7184	98.2191	97.8858	95.6341	95.8191	96.0895	92.0009	93.5346	93.3907	94.1332	94.7316	94.7975	97.0694	95.931	95.5315	95.6049	94.0427	96.455	98.2547	98.6578	98.2002	95.8765	96.1277	96.302	94.5172	96.262	96.1558	88.5647	96.5611	95.5672	97.6818	95.2077	96.2396	94.6077	94.9328	94.3401	96.0245	95.2083	94.7231	95.6164	98.1321	95.9035	97.5792	97.6773	97.7027	97.0192
2652	97.6513	97.4408	97.5966	96.7165	98.2868	97.8755	95.6112	95.8577	96.1423	92.0389	93.5289	93.3919	94.1675	94.747	94.799	97.0228	95.9753	95.5315	95.6259	94.0785	96.4846	98.2116	98.6642	98.178	95.9176	96.1318	96.3433	94.503	96.2524	96.1525	88.5377	96.5313	95.6064	97.7062	95.2382	96.2432	94.5947	94.9147	94.318	96.0299	95.1856	94.7302	95.636	98.1191	95.9425	97.6004	97.6881	97.7281	97.0031
2650.14	97.6705	97.4844	97.6128	96.7413	98.3337	97.8735	95.601	95.874	96.143	92.0561	93.5265	93.3547	94.1906	94.7814	94.8286	97.0445	95.9594	95.5396	95.611	94.1023	96.4725	98.2116	98.7123	98.1279	95.9224	96.1503	96.3833	94.485	96.265	96.1915	88.5603	96.5088	95.6149	97.7284	95.276	96.2628	94.59	94.9314	94.2883	96.02	95.1604	94.7214	95.6183	98.1495	95.9193	97.5687	97.6782	97.7244	96.9988
2648.27	97.6976	97.4877	97.6496	96.7728	98.3464	97.8671	95.6571	95.9102	96.1435	92.0346	93.5438	93.3355	94.1933	94.8354	94.8389	97.0648	95.931	95.5539	95.6053	94.1131	96.4711	98.2517	98.7224	98.1257	95.9142	96.2074	96.3961	94.4983	96.2936	96.2252	88.5993	96.5149	95.6319	97.6888	95.301	96.2802	94.5831	94.9212	94.3067	96.0204	95.185	94.7366	95.6666	98.1753	95.9142	97.5444	97.6827	97.735	97.0245
2646.41	97.7094	97.4991	97.7091	96.7571	98.3525	97.8487	95.7129	95.9311	96.2159	92.0569	93.5554	93.3736	94.205	94.8517	94.8545	97.0528	95.9222	95.5783	95.6253	94.1109	96.4887	98.2174	98.6618	98.1769	95.916	96.2266	96.3951	94.5385	96.2765	96.2308	88.6288	96.4901	95.6928	97.6865	95.3201	96.3224	94.6156	94.9094	94.3428	95.9795	95.1796	94.7278	95.7069	98.1554	95.9383	97.5812	97.6695	97.7519	97.0102
2644.55	97.6912	97.5129	97.6843	96.7516	98.379	97.8679	95.7073	95.939	96.254	92.1084	93.5738	93.4279	94.2242	94.8733	94.8918	97.0723	95.9455	95.6435	95.6536	94.1275	96.4774	98.1948	98.7067	98.2657	95.9448	96.187	96.421	94.6143	96.251	96.2139	88.6452	96.5378	95.7065	97.7378	95.3411	96.3722	94.6615	94.9339	94.3414	95.9626	95.14	94.7199	95.6711	98.1866	95.9674	97.5702	97.6707	97.7464	97.0396
2642.68	97.6944	97.5446	97.6743	96.7673	98.4043	97.8934	95.7046	95.9388	96.2128	92.1334	93.6247	93.4547	94.2332	94.9086	94.9394	97.1097	95.9735	95.6904	95.7353	94.1568	96.4829	98.211	98.7522	98.2504	95.9994	96.179	96.4496	94.6399	96.2787	96.2179	88.6537	96.5846	95.7044	97.7569	95.37	96.406	94.6556	94.94	94.3182	96.0124	95.1797	94.7158	95.684	98.2145	95.9948	97.5604	97.7415	97.7626	97.0754
2640.82	97.7425	97.5603	97.7339	96.7767	98.3828	97.8875	95.7334	95.9435	96.2122	92.1347	93.6393	93.4437	94.265	94.9449	94.9642	97.148	95.9937	95.645	95.798	94.1599	96.5051	98.2514	98.75	98.1918	96.0202	96.2373	96.4781	94.6297	96.3277	96.2123	88.666	96.5863	95.7346	97.7542	95.4066	96.4123	94.6505	94.8916	94.3376	96.0392	95.1979	94.7043	95.7427	98.2212	96.0262	97.5923	97.7537	97.7804	97.0544
2638.95	97.8393	97.582	97.7789	96.7845	98.3243	97.8733	95.7694	95.9883	96.2484	92.1832	93.6311	93.4555	94.2896	94.9828	94.9737	97.1569	96.0121	95.6253	95.8042	94.181	96.5104	98.234	98.7188	98.2177	95.9988	96.2941	96.5312	94.6392	96.3149	96.2382	88.6839	96.5925	95.7509	97.7466	95.433	96.4495	94.6261	94.8842	94.3453	96.0068	95.2106	94.7065	95.8013	98.2248	96.08	97.5967	97.7401	97.7818	97.0592
2637.09	97.8194	97.6234	97.7819	96.7834	98.2893	97.8821	95.7584	96.0432	96.2805	92.1988	93.686	93.5013	94.3007	94.9711	94.9891	97.1459	96.0356	95.6715	95.7943	94.1863	96.5295	98.2334	98.69	98.2148	96.0156	96.3194	96.5768	94.6672	96.3137	96.2549	88.7154	96.5833	95.7681	97.7498	95.4337	96.4842	94.5892	94.8869	94.3347	96.039	95.1822	94.6862	95.7792	98.2094	96.1035	97.5971	97.7238	97.8065	97.1084
2635.23	97.7254	97.6212	97.7972	96.784	98.2748	97.8893	95.8118	96.0701	96.3422	92.2205	93.7216	93.5019	94.2799	94.9751	94.9942	97.1689	96.0504	95.6826	95.749	94.1681	96.561	98.2541	98.6956	98.1847	96.0582	96.3131	96.5814	94.6681	96.3276	96.248	88.7226	96.6054	95.8168	97.8253	95.401	96.4895	94.5798	94.9039	94.3428	96.0815	95.1676	94.6423	95.7958	98.2057	96.0878	97.6291	97.6935	97.8321	97.0695
2633.36	97.7753	97.5934	97.8076	96.8097	98.2962	97.9367	95.8961	96.0498	96.3704	92.2941	93.7168	93.5022	94.3001	94.9934	95.0008	97.2084	96.0563	95.6725	95.7219	94.1947	96.5582	98.2794	98.7236	98.2184	96.0741	96.3462	96.5618	94.6903	96.3708	96.2974	88.7263	96.7053	95.7908	97.8445	95.4347	96.5214	94.6436	94.9167	94.3899	96.0828	95.1954	94.6507	95.8259	98.253	96.0587	97.6354	97.7064	97.8217	97.0505
2631.5	97.8332	97.5735	97.7355	96.8132	98.3583	97.974	95.8979	96.0224	96.3851	92.2972	93.751	93.484	94.359	94.9897	95.0053	97.1827	96.0518	95.6981	95.7702	94.2464	96.549	98.2655	98.7426	98.2265	96.0853	96.3584	96.5534	94.6966	96.3809	96.3325	88.7473	96.7161	95.7515	97.8541	95.4698	96.5102	94.6912	94.9613	94.3888	96.0653	95.211	94.7166	95.8264	98.246	96.0854	97.5891	97.7597	97.7862	97.1283
2629.64	97.7751	97.5743	97.7417	96.7785	98.3953	97.9242	95.8744	95.9908	96.39	92.2106	93.7921	93.474	94.3711	94.9642	95.0082	97.1528	96.0556	95.7203	95.8301	94.253	96.5827	98.2336	98.7426	98.215	96.1052	96.322	96.5668	94.6695	96.361	96.2882	88.7634	96.6554	95.7755	97.875	95.46	96.4344	94.6761	94.9997	94.3868	96.047	95.3245	94.8086	95.8201	98.2252	96.1213	97.598	97.7966	97.7846	97.1943
2627.77	97.7452	97.5984	97.8124	96.749	98.3565	97.8728	95.8472	95.9692	96.3515	92.1826	93.7824	93.5427	94.3929	94.9598	95.0341	97.137	96.078	95.7084	95.8383	94.2385	96.5956	98.2353	98.733	98.2617	96.0976	96.3287	96.5548	94.6781	96.3579	96.2545	88.7608	96.6397	95.7708	97.8569	95.4429	96.3873	94.6887	95.0027	94.4329	96.0836	95.3802	94.887	95.827	98.195	96.1032	97.6222	97.7489	97.8089	97.1998
2625.91	97.7691	97.5759	97.7801	96.7496	98.3454	97.8855	95.824	96.0022	96.3564	92.2407	93.7802	93.5774	94.3961	94.9762	95.0522	97.1208	96.1064	95.702	95.8183	94.2326	96.5905	98.2425	98.7594	98.2493	96.0707	96.3609	96.5373	94.6761	96.3357	96.3047	88.7442	96.6427	95.7635	97.8365	95.417	96.4201	94.7565	95.0614	94.4899	96.1378	95.3903	94.9162	95.8306	98.179	96.0606	97.6191	97.7126	97.7553	97.15
2624.05	97.745	97.5688	97.6997	96.7494	98.3712	97.9193	95.8048	96.0395	96.3409	92.2812	93.7939	93.5581	94.3337	95.0304	95.049	97.1359	96.0835	95.6878	95.8102	94.2186	96.5939	98.2477	98.7483	98.2146	96.0825	96.3483	96.5347	94.6599	96.368	96.3229	88.6907	96.6512	95.779	97.7979	95.4207	96.4549	94.772	95.1026	94.5164	96.1856	95.4239	94.9749	95.814	98.2139	96.0473	97.6239	97.7984	97.7571	97.1013
2622.18	97.6732	97.5527	97.6847	96.8117	98.3724	97.9404	95.778	96.0521	96.3105	92.3337	93.8133	93.5503	94.3527	95.0408	95.0425	97.1436	96.0467	95.674	95.774	94.2281	96.562	98.2432	98.7007	98.2154	96.0998	96.3637	96.5561	94.7044	96.3995	96.3107	88.7245	96.6678	95.7826	97.7656	95.4221	96.425	94.7828	95.1415	94.5581	96.2471	95.4298	95.0761	95.7947	98.2568	96.0749	97.6323	97.8217	97.788	97.084
2620.32	97.6779	97.5148	97.7009	96.8287	98.378	97.9854	95.7538	96.0473	96.3332	92.3787	93.8409	93.6212	94.4115	94.9761	95.0504	97.1519	96.0504	95.6718	95.7382	94.2665	96.5566	98.2628	98.723	98.2654	96.0866	96.3972	96.5756	94.7268	96.397	96.3006	88.757	96.6914	95.7757	97.7641	95.4169	96.4328	94.8141	95.1235	94.6157	96.2947	95.4031	95.1515	95.8014	98.2357	96.1403	97.6303	97.7117	97.769	97.0753
2618.45	97.7139	97.4907	97.6529	96.7886	98.3749	97.9581	95.7614	96.0282	96.3334	92.3534	93.8486	93.6262	94.399	94.9322	95.0642	97.1764	96.0837	95.679	95.7647	94.2577	96.5933	98.2917	98.7617	98.2768	96.0941	96.3487	96.5831	94.731	96.3939	96.295	88.765	96.6861	95.7295	97.7804	95.4357	96.4593	94.8809	95.0733	94.7104	96.3338	95.4606	95.1666	95.8328	98.1942	96.1785	97.5935	97.6794	97.7576	97.1274
2616.59	97.6874	97.4993	97.6501	96.7851	98.3469	97.9212	95.8408	96.0365	96.3072	92.3255	93.8411	93.5834	94.3655	94.9285	95.0366	97.1552	96.1233	95.6971	95.8164	94.2423	96.5584	98.3042	98.763	98.2707	96.1072	96.2904	96.5648	94.7676	96.3215	96.3084	88.7671	96.6423	95.7164	97.8153	95.4643	96.429	94.9157	95.1112	94.71	96.3833	95.5725	95.185	95.8933	98.2347	96.1401	97.5677	97.671	97.7708	97.1418
2614.73	97.6463	97.5269	97.6951	96.8078	98.3435	97.9614	95.8604	96.058	96.342	92.345	93.8338	93.6338	94.4014	94.943	95.0193	97.1149	96.1171	95.7414	95.8319	94.2733	96.536	98.2869	98.7471	98.2274	96.1207	96.2979	96.564	94.8205	96.3218	96.3067	88.7742	96.63	95.788	97.8082	95.4575	96.4366	94.904	95.2172	94.6813	96.4122	95.5941	95.2431	95.8556	98.2238	96.1065	97.6049	97.6675	97.8269	97.1735
2612.86	97.7032	97.5706	97.7391	96.826	98.3424	97.9624	95.8201	96.1184	96.3749	92.3205	93.8847	93.6723	94.4541	94.9711	95.0603	97.1268	96.1098	95.7972	95.8618	94.281	96.5647	98.2572	98.7335	98.1854	96.1565	96.3208	96.568	94.7952	96.395	96.3161	88.7994	96.6135	95.8387	97.7838	95.4948	96.4755	94.9349	95.2764	94.7511	96.42	95.5919	95.2818	95.7992	98.2014	96.1429	97.622	97.7058	97.8875	97.2
2611	97.8073	97.6323	97.7733	96.8065	98.3159	97.9725	95.8625	96.1936	96.4221	92.3786	93.9621	93.7154	94.4913	95.0626	95.1192	97.2126	96.1757	95.8105	95.9548	94.3229	96.6433	98.204	98.8077	98.2044	96.183	96.3437	96.6188	94.7649	96.4242	96.357	88.8304	96.6527	95.8256	97.7691	95.52	96.5247	94.97	95.2784	94.7898	96.5011	95.6339	95.3424	95.8868	98.2758	96.1687	97.6314	97.7765	97.9129	97.1902
2609.14	97.9055	97.6763	97.8148	96.7696	98.3318	98.0305	95.9373	96.2311	96.4994	92.4832	94.0306	93.7469	94.4839	95.151	95.1781	97.289	96.1992	95.818	95.9855	94.4343	96.6788	98.222	98.8145	98.2481	96.1944	96.4519	96.7061	94.823	96.4045	96.3817	88.8743	96.7361	95.8908	97.8179	95.5133	96.5481	95.0018	95.2939	94.7636	96.5584	95.6691	95.3884	95.9578	98.281	96.1708	97.6572	97.8225	97.88	97.2162
2607.27	97.9642	97.669	97.8341	96.7994	98.3682	98.0006	95.9675	96.2283	96.5111	92.4938	94.034	93.7833	94.4775	95.2078	95.1995	97.2822	96.1623	95.8483	95.9318	94.4992	96.6306	98.2842	98.754	98.2791	96.2167	96.5727	96.7455	94.8702	96.413	96.4042	88.9262	96.7241	96.0532	97.9009	95.5645	96.5855	95.0062	95.3421	94.7786	96.5478	95.6754	95.4199	95.9834	98.2912	96.2114	97.717	97.7981	97.9067	97.2504
2605.41	97.982	97.7607	97.817	96.8765	98.4012	97.986	95.9741	96.2109	96.5398	92.4759	93.9843	93.8099	94.5507	95.214	95.2287	97.2478	96.1509	95.8854	95.9212	94.4451	96.6283	98.3352	98.7455	98.3489	96.2485	96.6432	96.744	94.9117	96.4234	96.4489	88.9746	96.7273	96.0787	97.9733	95.6482	96.6174	95.0011	95.3625	94.8003	96.5261	95.7121	95.4587	96.0211	98.3435	96.2507	97.7104	97.8204	97.9134	97.2551
2603.54	98.0199	97.8788	97.859	96.8602	98.4655	98.0151	96.0617	96.2145	96.5674	92.4286	94.0048	93.7894	94.6404	95.223	95.3218	97.2598	96.1527	95.92	95.9484	94.3651	96.6598	98.3813	98.7557	98.3895	96.3277	96.6962	96.7435	94.9015	96.4718	96.455	89.0104	96.7956	95.9997	97.9842	95.7098	96.6346	95.0312	95.3494	94.8417	96.5191	95.7886	95.4698	96.0462	98.3136	96.2934	97.7099	97.8708	97.9083	97.2957
2601.68	98.062	97.852	97.9348	96.8125	98.4553	97.9629	96.1498	96.2969	96.5918	92.451	94.0358	93.8271	94.6525	95.2499	95.347	97.3133	96.1872	95.9294	95.9291	94.4064	96.6869	98.3704	98.7703	98.3341	96.3495	96.6629	96.7379	94.8704	96.5139	96.4437	89.0201	96.809	95.9382	97.9819	95.7321	96.7169	95.1032	95.3648	94.8696	96.5703	95.8687	95.4849	96.0181	98.2928	96.3101	97.7855	97.8634	97.9351	97.288
2599.82	98.053	97.7596	97.9544	96.8018	98.382	97.9213	96.15	96.3569	96.6154	92.4312	94.001	93.8967	94.6732	95.301	95.3097	97.3781	96.2177	95.8997	95.909	94.4627	96.6796	98.3298	98.8213	98.3161	96.3151	96.5738	96.7832	94.9228	96.4815	96.4216	89.0162	96.7687	95.9924	97.9668	95.7617	96.7506	95.1178	95.4053	94.8931	96.6235	95.8809	95.5234	95.9839	98.3373	96.3309	97.805	97.8778	97.963	97.2675
2597.95	98.046	97.7983	97.9791	96.8392	98.4131	97.9875	96.1228	96.3158	96.6321	92.4893	93.9801	93.9247	94.6804	95.3024	95.2611	97.3898	96.2175	95.8985	95.9433	94.4581	96.6476	98.3037	98.8862	98.3716	96.3163	96.5877	96.8528	94.959	96.4384	96.4197	89.0252	96.7661	96.0198	97.9504	95.7657	96.7086	95.0859	95.3946	94.9324	96.5731	95.8036	95.5294	96.0112	98.3368	96.4275	97.7597	97.8606	97.9813	97.2769
2596.09	97.9971	97.8358	98.0142	96.8982	98.5078	98.0253	96.1042	96.3053	96.6292	92.6025	94.0172	93.8304	94.6381	95.2532	95.2634	97.3712	96.2288	95.955	95.9677	94.4422	96.7109	98.3227	98.8504	98.3564	96.3137	96.6338	96.8679	94.9723	96.4672	96.486	89.0666	96.8037	96.0021	98.0004	95.7834	96.6852	95.0417	95.3788	95.0038	96.614	95.7792	95.5549	96.1094	98.3336	96.3973	97.7469	97.8188	97.9327	97.3181
2594.23	97.9347	97.835	98.0336	96.8838	98.5341	98.0005	96.1167	96.3246	96.5697	92.6211	94.1165	93.7987	94.6635	95.2519	95.3268	97.361	96.2282	95.9987	95.9696	94.4281	96.736	98.3772	98.7554	98.3521	96.3324	96.556	96.823	94.9564	96.4713	96.5237	89.0932	96.8399	96.0107	98.0602	95.7821	96.6539	95.0757	95.4	95.0586	96.7314	95.8636	95.6149	96.1963	98.354	96.2778	97.7236	97.8908	97.8969	97.374
2592.36	97.9073	97.8251	97.9881	96.8379	98.5031	97.9731	96.1048	96.3231	96.547	92.6692	94.1541	93.9222	94.682	95.2388	95.3554	97.3276	96.2957	95.9689	95.9599	94.4055	96.692	98.3943	98.8242	98.4092	96.4113	96.4772	96.8182	94.932	96.5052	96.4731	89.0767	96.8828	96.0296	98.0351	95.7546	96.6397	95.1583	95.4464	95.0938	96.7249	95.9055	95.6251	96.1488	98.2754	96.2744	97.724	97.944	97.9895	97.3575
2590.5	97.9172	97.7101	97.9343	96.8355	98.4202	97.9371	96.1157	96.2973	96.5788	92.6557	94.1752	93.9338	94.6047	95.2559	95.3456	97.3047	96.3248	95.9369	95.9355	94.4003	96.7181	98.3909	98.88	98.4013	96.4815	96.5074	96.8049	94.9719	96.5942	96.4782	89.097	96.8354	96.0738	98.0203	95.7057	96.6279	95.1846	95.4599	95.0958	96.7578	95.9297	95.6833	96.0366	98.2245	96.3225	97.729	97.9128	98.0174	97.2565
2588.64	97.8056	97.6133	97.8367	96.886	98.3706	97.9262	96.1281	96.3057	96.6045	92.5446	94.1971	93.8727	94.5888	95.2878	95.3448	97.3249	96.2849	95.9206	95.9755	94.4591	96.7111	98.3698	98.8217	98.3436	96.4347	96.5339	96.7682	94.9524	96.5886	96.4717	89.0394	96.7584	96.0487	97.9644	95.6438	96.6339	95.2227	95.4315	95.0786	96.7989	95.9892	95.7734	95.925	98.2702	96.308	97.7531	97.7971	97.9224	97.212
2586.77	97.7342	97.614	97.7995	96.856	98.3783	97.9854	96.0431	96.3115	96.6172	92.531	94.1274	93.8856	94.6366	95.2692	95.2738	97.3019	96.2318	95.8643	96.0494	94.484	96.6612	98.3711	98.7976	98.289	96.3426	96.5298	96.7736	94.9126	96.4421	96.37	88.8983	96.7665	95.9594	97.8622	95.6299	96.6018	95.2317	95.5132	95.099	96.8033	95.9943	95.7363	95.9223	98.2795	96.2885	97.745	97.7751	97.8431	97.2576
2584.91	97.7326	97.6216	97.7789	96.8416	98.3727	98.043	95.9653	96.3098	96.6004	92.5733	94.0703	93.9221	94.6376	95.2188	95.2284	97.2658	96.201	95.8526	95.9968	94.4555	96.6381	98.4013	98.789	98.2669	96.275	96.5291	96.7469	94.8917	96.3964	96.3887	88.9006	96.7458	95.9404	97.7938	95.6497	96.5985	95.2102	95.5715	95.1133	96.8359	96.0056	95.7335	96.0182	98.2785	96.2541	97.7132	97.8406	97.8195	97.2622
2583.04	97.724	97.5709	97.7162	96.8868	98.3599	98.0121	95.9994	96.2711	96.5795	92.5873	94.0934	93.9651	94.6122	95.1804	95.2311	97.2651	96.1976	95.894	95.9413	94.4379	96.6395	98.3128	98.7741	98.3226	96.2474	96.5068	96.7382	94.8509	96.4029	96.3881	88.9367	96.7114	95.9501	97.8316	95.5727	96.546	95.2725	95.5587	95.0974	96.8759	96.03	95.7684	96.0705	98.3231	96.2235	97.7032	97.8018	97.8478	97.2032
2581.18	97.7543	97.527	97.7442	96.9208	98.3988	97.9643	96.0457	96.2044	96.5622	92.5995	94.1506	93.9617	94.6384	95.2043	95.2541	97.2866	96.1791	95.903	95.9629	94.4335	96.6706	98.305	98.7798	98.3594	96.2802	96.4933	96.7313	94.8972	96.3863	96.3589	88.9719	96.7383	95.9333	97.9427	95.5308	96.5057	95.3307	95.5443	95.0849	96.8814	96.0735	95.7998	96.0365	98.2647	96.2786	97.7274	97.7771	97.9069	97.1726
2579.32	97.8099	97.6119	97.781	96.9312	98.395	97.9592	96.0334	96.19	96.5414	92.6401	94.1977	93.8811	94.7197	95.2313	95.2838	97.3096	96.2279	95.926	95.96	94.469	96.7008	98.3146	98.7872	98.351	96.335	96.522	96.6966	94.9923	96.4102	96.4623	89.0348	96.7404	96.0162	98.009	95.5986	96.547	95.3121	95.581	95.0873	96.9052	96.1217	95.8769	96.0192	98.1538	96.2809	97.7751	97.8299	97.8967	97.2204
2577.45	97.8481	97.7047	97.7959	96.9081	98.4513	97.9923	96.0781	96.3014	96.5809	92.6301	94.1614	93.853	94.7496	95.2611	95.3374	97.3253	96.3106	95.9448	95.9844	94.5393	96.7172	98.281	98.8167	98.3714	96.3771	96.5817	96.7726	94.9768	96.4482	96.5318	89.0695	96.7793	96.0536	97.9557	95.7161	96.6483	95.3244	95.5812	95.1074	96.9203	96.1535	95.928	96.0064	98.2041	96.2932	97.8034	97.8671	97.9043	97.2937
2575.59	97.8681	97.7359	97.818	96.8492	98.5397	97.9885	96.156	96.4644	96.6331	92.6604	94.1568	93.9494	94.7384	95.3772	95.4086	97.3219	96.3238	95.9406	96.0339	94.5612	96.7346	98.3016	98.81	98.3597	96.3749	96.624	96.8952	94.9565	96.4008	96.4871	89.0485	96.8253	96.0638	97.9438	95.8003	96.6723	95.295	95.5547	95.2098	96.8913	96.1826	95.904	96.0314	98.3071	96.3507	97.7755	97.8792	97.9779	97.2719
2573.73	97.9284	97.7425	97.8892	96.8522	98.5531	97.9308	96.1945	96.512	96.6324	92.7392	94.2188	94.044	94.7199	95.4887	95.476	97.3543	96.3621	95.9896	96.0284	94.5456	96.8239	98.3636	98.8483	98.3693	96.435	96.655	96.928	95.0694	96.4878	96.4548	89.0956	96.8335	96.0889	98.0405	95.856	96.6689	95.3687	95.5849	95.326	96.887	96.2078	95.8988	96.0715	98.3337	96.3876	97.7669	97.9213	97.9746	97.2297
2571.86	98.0137	97.7865	97.99	96.864	98.5171	97.8897	96.1833	96.477	96.6765	92.7862	94.2266	94.0597	94.7287	95.4544	95.5164	97.3972	96.4355	96.0074	96.018	94.5577	96.8656	98.4014	98.9485	98.4012	96.5225	96.7158	96.9067	95.0919	96.6375	96.4792	89.2089	96.8553	96.1198	98.159	95.8589	96.7293	95.5165	95.6371	95.2836	96.9246	96.2254	95.9483	96.1034	98.305	96.4877	97.7282	97.981	97.9118	97.2737
2570	98.084	97.8295	98.0149	96.8775	98.4681	97.9313	96.1609	96.4718	96.7533	92.7857	94.2759	94.0372	94.8206	95.4044	95.5234	97.4081	96.461	96.046	96.0624	94.5977	96.8332	98.4	98.9586	98.4668	96.5062	96.7594	96.9343	95.028	96.6573	96.5432	89.2852	96.8834	96.1723	98.151	95.8734	96.8035	95.5511	95.6839	95.1791	96.9736	96.1966	95.9682	96.1653	98.2992	96.5527	97.7423	97.9415	97.9833	97.3137
2568.13	98.1675	97.9424	98.0154	96.9383	98.4662	98.0056	96.252	96.5348	96.8138	92.7801	94.3198	94.0221	94.8722	95.4091	95.5201	97.4876	96.4263	96.1184	96.0851	94.6226	96.8306	98.4369	98.9	98.4748	96.503	96.7639	97.0323	95.0974	96.5913	96.5164	89.2776	96.8896	96.227	98.1027	95.8867	96.8448	95.473	95.6781	95.2055	97.0247	96.1645	96.0165	96.2643	98.3576	96.5763	97.8482	97.9173	98.0382	97.3848
2566.27	98.1692	98.0222	98.0738	96.9497	98.5304	98.0503	96.324	96.5469	96.8495	92.7745	94.3071	94.0684	94.873	95.4605	95.5368	97.5555	96.4027	96.158	96.0878	94.6721	96.8568	98.5272	98.9175	98.4181	96.5633	96.7496	97.1132	95.1362	96.612	96.5226	89.2718	96.9061	96.2628	98.0935	95.9128	96.8326	95.3851	95.6788	95.2155	97.0881	96.1715	96.0049	96.2957	98.3672	96.5269	97.8855	97.9393	98.0483	97.4062
2564.41	98.1326	98.06	98.1534	96.9289	98.5414	98.0845	96.2827	96.5409	96.857	92.8015	94.3	94.1326	94.8672	95.515	95.5934	97.5424	96.4312	96.1527	96.1272	94.7072	96.8808	98.547	98.9699	98.4471	96.6273	96.8012	97.1188	95.1404	96.6647	96.5981	89.2401	96.9133	96.2554	98.0695	96.0241	96.8335	95.4414	95.6941	95.2715	97.1186	96.208	95.9983	96.2756	98.2975	96.4813	97.8066	97.9353	98.0678	97.3906
2562.54	98.1876	97.9765	98.1864	96.9111	98.5302	98.1661	96.2617	96.5524	96.8817	92.8603	94.3279	94.1994	94.8795	95.5846	95.6504	97.5259	96.4834	96.1349	96.1488	94.6517	96.8132	98.5213	98.996	98.5166	96.6556	96.8904	97.0926	95.1715	96.6415	96.5946	89.281	97.0071	96.308	98.1415	96.0446	96.8585	95.49	95.7156	95.348	97.1196	96.2202	96.0063	96.3497	98.331	96.541	97.7772	97.9376	98.0585	97.4564
2560.68	98.268	98.0055	98.2506	96.8948	98.5586	98.1824	96.2655	96.5696	96.8967	92.9175	94.3687	94.2354	94.9022	95.6199	95.6036	97.5457	96.563	96.1476	96.1323	94.6428	96.7361	98.5389	98.9344	98.521	96.6737	96.964	97.124	95.1802	96.5991	96.6098	89.4335	97.0744	96.3044	98.2417	95.9799	96.8542	95.446	95.721	95.3504	97.1001	96.2627	96.0751	96.3881	98.4066	96.6212	97.8158	97.9952	98.0817	97.4915
2558.82	98.2678	98.052	98.256	96.9166	98.5435	98.1482	96.3212	96.6191	96.8767	92.9024	94.372	94.2092	94.9656	95.5352	95.5709	97.5793	96.566	96.1926	96.1161	94.7105	96.771	98.5527	98.9074	98.545	96.6749	96.9495	97.1651	95.1851	96.6227	96.7092	89.496	97.0232	96.2681	98.3059	95.9975	96.9127	95.4147	95.7604	95.2902	97.1053	96.3043	96.0947	96.3717	98.4511	96.6579	97.8871	98.071	98.1454	97.4757
2556.95	98.2859	98.018	98.0981	96.9471	98.5573	98.1082	96.3452	96.6477	96.8947	92.8443	94.4184	94.2242	95.0406	95.5054	95.6127	97.5849	96.5164	96.231	96.1324	94.7707	96.8359	98.4679	98.9295	98.56	96.6912	96.8851	97.2078	95.1872	96.683	96.7319	89.4476	96.9714	96.3245	98.2537	96.0576	97.0389	95.4234	95.8133	95.3299	97.1209	96.3049	96.1506	96.3674	98.4557	96.6383	97.8967	98.0811	98.1492	97.5072
2555.09	98.2992	98.0359	98.0897	96.9564	98.5905	98.1139	96.3691	96.5688	96.8784	92.8673	94.4627	94.2385	94.9767	95.5785	95.6294	97.585	96.4967	96.2208	96.1537	94.769	96.8667	98.4633	98.8609	98.5514	96.7301	96.9132	97.2609	95.2178	96.6569	96.6102	89.4399	96.984	96.3833	98.202	96.0251	96.9985	95.4554	95.7965	95.3007	97.1109	96.3159	96.1825	96.3596	98.3907	96.6457	97.9363	98.082	98.112	97.5027
2553.23	98.2734	98.0783	98.1658	96.9431	98.5505	98.1339	96.4382	96.5225	96.8841	92.9946	94.4823	94.2411	94.9391	95.6547	95.6089	97.5913	96.5398	96.196	96.1657	94.7248	96.8142	98.5077	98.9097	98.567	96.7364	97.0016	97.2351	95.2177	96.6159	96.5645	89.4698	96.9971	96.3509	98.2538	96.0694	96.9461	95.5077	95.7318	95.2967	97.018	96.3161	96.1645	96.3478	98.3331	96.6146	97.9559	98.0862	98.0653	97.4582
2551.36	98.1912	98.084	98.266	96.9904	98.5769	98.1298	96.4684	96.6397	96.9387	93.0535	94.5121	94.2138	95.0219	95.6762	95.6393	97.6267	96.6487	96.2399	96.2067	94.7225	96.7929	98.5002	99.0341	98.5651	96.7864	97.0313	97.2508	95.1667	96.6974	96.6497	89.5127	96.9936	96.2883	98.3757	96.1764	97.0001	95.5457	95.7264	95.3957	97.033	96.3554	96.1445	96.3577	98.3558	96.6651	97.9271	97.9939	98.1196	97.4849
2549.5	98.2872	98.1406	98.2782	96.9836	98.6664	98.0275	96.4775	96.7179	96.9623	93.0532	94.5285	94.2053	95.0475	95.6886	95.7359	97.6303	96.6652	96.263	96.2857	94.7696	96.8016	98.5026	99.0159	98.5403	96.8464	97.0491	97.3285	95.258	96.7701	96.7091	89.4948	97.0405	96.4035	98.4511	96.2042	97.023	95.5271	95.7231	95.4902	97.1482	96.3793	96.1681	96.3874	98.4069	96.7392	97.9493	97.9244	98.1421	97.5294
2547.63	98.3677	98.2028	98.2358	96.9873	98.6358	98.0658	96.4885	96.6764	97.0476	93.0568	94.5557	94.3109	95.0615	95.6514	95.7611	97.6143	96.6225	96.2376	96.3343	94.8391	96.8381	98.5462	99.0135	98.6121	96.8274	97.012	97.3045	95.4068	96.8381	96.6576	89.5379	97.0177	96.5024	98.4135	96.1538	97.0081	95.5508	95.717	95.4614	97.1288	96.32	96.1875	96.4587	98.4316	96.755	97.9464	98.0268	98.1556	97.5377
2545.77	98.3388	98.2426	98.3472	97.0353	98.6053	98.0844	96.4707	96.6778	97.0798	93.075	94.6115	94.3375	95.0988	95.6342	95.748	97.6399	96.6118	96.2575	96.304	94.865	96.9444	98.5729	99.0377	98.6299	96.8335	96.9427	97.307	95.4535	96.7994	96.5722	89.592	97.0126	96.5037	98.361	96.126	97.1076	95.6313	95.7903	95.391	97.1248	96.3424	96.1618	96.4942	98.4606	96.7752	98	98.1645	98.2121	97.5209
2543.91	98.3877	98.257	98.3864	97.0744	98.6137	98.086	96.4013	96.7611	96.9886	93.12	94.6216	94.3709	95.1008	95.7201	95.8097	97.6655	96.6212	96.2833	96.2972	94.864	96.9655	98.5894	99.059	98.6753	96.8622	96.9951	97.323	95.3906	96.6865	96.6272	89.5858	97.1119	96.5128	98.3773	96.2179	97.1924	95.6286	95.8359	95.3777	97.1711	96.377	96.2268	96.4793	98.4169	96.7644	98.0573	98.1483	98.2317	97.5002
2542.04	98.5005	98.2658	98.3397	97.0825	98.552	98.1704	96.377	96.8188	96.9927	93.1788	94.613	94.4262	95.1562	95.7811	95.8244	97.6707	96.6585	96.2786	96.2889	94.861	96.8648	98.6074	99.0638	98.7236	96.8704	97.0883	97.2966	95.3754	96.7164	96.7542	89.5871	97.0954	96.5392	98.4236	96.3052	97.1556	95.6099	95.855	95.4166	97.2027	96.4347	96.2882	96.4756	98.3975	96.7378	97.9887	98.0543	98.2404	97.5449
2540.18	98.4457	98.2755	98.3611	97.1143	98.5287	98.213	96.4068	96.7708	97.0668	93.1722	94.5914	94.434	95.1913	95.7101	95.7832	97.6872	96.6949	96.2841	96.2516	94.826	96.8585	98.6098	99.0072	98.6654	96.9023	97.0836	97.2696	95.4447	96.8002	96.8125	89.6215	97.0716	96.5229	98.378	96.2947	97.0478	95.6164	95.8422	95.4677	97.2237	96.4729	96.2629	96.4811	98.4247	96.782	97.9658	98.0655	98.1774	97.5901
2538.32	98.333	98.225	98.3649	97.0663	98.6037	98.1461	96.432	96.7279	97.1214	93.1478	94.6252	94.4729	95.1863	95.6802	95.7799	97.7145	96.7099	96.3224	96.2414	94.7809	96.9185	98.59	98.9892	98.6135	96.9307	97.0739	97.3044	95.4197	96.8568	96.742	89.6806	97.0977	96.5318	98.335	96.2495	97.0465	95.6196	95.8424	95.5112	97.2686	96.414	96.232	96.5132	98.3889	96.8225	97.9797	98.178	98.1657	97.6484
2536.45	98.4126	98.1627	98.3623	97.0495	98.6391	98.1458	96.4954	96.7342	97.1584	93.1269	94.6696	94.4582	95.16	95.7485	95.7884	97.746	96.7147	96.3584	96.2653	94.8441	96.9326	98.629	99.0485	98.6387	96.9962	97.1773	97.4011	95.3202	96.8167	96.6633	89.681	97.0837	96.5326	98.3924	96.2892	97.0987	95.6889	95.9297	95.5182	97.3189	96.4194	96.1986	96.4705	98.4447	96.8301	97.965	98.1859	98.1228	97.6653
2534.59	98.5326	98.2086	98.4475	97.0612	98.5876	98.2162	96.5831	96.7647	97.1339	93.1372	94.6813	94.4355	95.1582	95.876	95.808	97.7203	96.6595	96.3359	96.3131	94.8901	96.9461	98.6274	99.0272	98.6602	96.9828	97.2155	97.4032	95.329	96.8254	96.6747	89.6356	97.132	96.4875	98.5023	96.3545	97.1482	95.7335	95.9004	95.4649	97.3077	96.4606	96.1937	96.5234	98.5076	96.8089	97.9626	98.1603	98.1603	97.6554
2532.73	98.5311	98.2968	98.4851	97.0433	98.6198	98.2026	96.6401	96.8534	97.0745	93.1813	94.7112	94.4136	95.1987	95.9034	95.8692	97.7066	96.6545	96.3376	96.3568	94.8516	96.9061	98.6636	98.9867	98.5582	96.9471	97.1586	97.3866	95.3571	96.8706	96.8256	89.6333	97.1553	96.5574	98.4884	96.3721	97.1675	95.6891	95.8164	95.4373	97.2494	96.4317	96.2917	96.5804	98.4897	96.8256	98.0413	98.1749	98.2579	97.6708
2530.86	98.5221	98.3175	98.4334	97.0832	98.6061	98.1485	96.6237	96.8673	97.028	93.1529	94.7047	94.4134	95.2018	95.759	95.9357	97.7353	96.725	96.3701	96.3757	94.8809	96.8136	98.7023	98.943	98.5331	96.9467	97.1591	97.4776	95.3017	96.8239	96.8276	89.6616	97.1721	96.6313	98.4775	96.3514	97.1562	95.6337	95.7987	95.4936	97.2071	96.4451	96.3287	96.5665	98.457	96.8704	98.1134	98.1217	98.3114	97.6296
2529	98.5865	98.3042	98.3943	97.1094	98.5566	98.133	96.6059	96.839	97.1012	93.1461	94.7257	94.4387	95.164	95.7707	95.9447	97.766	96.7916	96.3963	96.3868	94.8528	96.8508	98.6221	98.9905	98.6567	96.9672	97.2071	97.4912	95.3396	96.845	96.7273	89.6875	97.1887	96.5829	98.5237	96.2941	97.18	95.6204	95.8322	95.5521	97.2089	96.5392	96.3005	96.5722	98.4318	96.8776	98.1555	98.1514	98.2735	97.576
2527.13	98.5176	98.3093	98.414	97.1149	98.625	98.1971	96.6671	96.8552	97.2348	93.2511	94.7651	94.4896	95.1585	95.8287	95.9376	97.743	96.8094	96.408	96.4029	94.8239	96.9634	98.5699	99.0595	98.6397	96.9885	97.2168	97.368	95.4321	96.8648	96.7546	89.6602	97.0833	96.5613	98.5231	96.2876	97.2428	95.6393	95.911	95.5248	97.2459	96.5979	96.2995	96.573	98.4181	96.8836	98.0934	98.2311	98.2616	97.6096
2525.27	98.3998	98.3303	98.5269	97.1119	98.6506	98.2399	96.6694	96.8722	97.2632	93.2733	94.7649	94.5059	95.2261	95.8028	95.9037	97.7046	96.7778	96.417	96.3936	94.9324	96.9952	98.6215	99.0865	98.6346	96.9744	97.176	97.3492	95.3894	96.8078	96.7435	89.706	97.0482	96.6575	98.5223	96.2959	97.2102	95.6407	95.9313	95.5604	97.2465	96.5386	96.333	96.5834	98.45	96.8638	98.0385	98.2016	98.3206	97.6066
2523.41	98.4756	98.3222	98.6279	97.0774	98.7158	98.2601	96.6161	96.8935	97.2228	93.2211	94.7643	94.4387	95.2355	95.8263	95.9052	97.7447	96.7118	96.4148	96.3989	94.9389	96.9297	98.6734	99.0432	98.731	97.0057	97.1427	97.4257	95.4253	96.7877	96.6753	89.7794	97.0765	96.6986	98.5666	96.2916	97.2361	95.6958	95.9001	95.5872	97.2439	96.5477	96.3946	96.6415	98.4733	96.8633	98.0968	98.1423	98.3062	97.6517
2521.54	98.5674	98.2927	98.6139	97.0851	98.8136	98.264	96.6715	96.8918	97.225	93.2735	94.8106	94.4403	95.2071	95.8627	96.0123	97.8088	96.6539	96.3715	96.4464	94.8527	96.9743	98.69	99.0012	98.828	97.067	97.1948	97.5436	95.4851	96.7985	96.7152	89.8042	97.1159	96.6469	98.5955	96.3689	97.3067	95.7236	95.9032	95.5662	97.3488	96.635	96.3697	96.6334	98.4825	96.9165	98.0622	98.1833	98.277	97.7207
2519.68	98.5455	98.3343	98.5193	97.0455	98.7696	98.1774	96.7014	96.9055	97.2331	93.3708	94.8139	94.5558	95.2733	95.8969	96.0488	97.8325	96.722	96.3561	96.4424	94.915	97.0486	98.7028	99.0169	98.8397	97.0726	97.2674	97.6449	95.4404	96.8333	96.8079	89.7211	97.1807	96.6782	98.5247	96.3598	97.2364	95.6903	95.906	95.4919	97.3931	96.6369	96.355	96.6226	98.461	96.9127	97.9867	98.2508	98.287	97.6674
2517.82	98.6025	98.4287	98.5445	97.0618	98.6949	98.1679	96.6374	96.9259	97.2358	93.3472	94.7874	94.613	95.3629	95.9433	95.9936	97.8189	96.844	96.3972	96.3807	95.0616	96.972	98.6589	99.0862	98.8124	97.0727	97.2967	97.6062	95.4875	96.8568	96.8549	89.6982	97.202	96.7078	98.4955	96.4024	97.1929	95.7004	95.9248	95.4992	97.3044	96.6419	96.435	96.6709	98.3658	96.922	98.0128	98.2788	98.3764	97.5894
2515.95	98.6506	98.5119	98.6323	97.1372	98.6905	98.2324	96.6625	96.9258	97.2297	93.3056	94.8181	94.5691	95.3381	95.9189	95.981	97.8322	96.8867	96.4185	96.383	95.0451	96.9596	98.6548	99.1361	98.7521	97.1163	97.3555	97.5978	95.5782	96.8375	96.9564	89.7454	97.1881	96.7677	98.4947	96.5153	97.2223	95.7939	95.9657	95.5692	97.2958	96.5877	96.4509	96.6628	98.4011	96.984	98.1123	98.2508	98.3872	97.6427
2514.09	98.5651	98.511	98.6688	97.1491	98.728	98.2235	96.7696	96.977	97.2258	93.3072	94.8339	94.564	95.3067	95.8899	95.9396	97.8214	96.8887	96.4788	96.4169	94.9645	96.9901	98.7158	99.1148	98.7484	97.1439	97.4474	97.6957	95.6205	96.8625	96.9936	89.8517	97.2323	96.7212	98.534	96.5685	97.378	95.8333	95.9315	95.5387	97.3291	96.5115	96.4097	96.6724	98.5075	97.0358	98.2377	98.2203	98.294	97.7281
2512.22	98.5986	98.5161	98.6536	97.1785	98.7263	98.1768	96.7744	97.0462	97.2013	93.3052	94.872	94.6143	95.3041	95.9359	95.944	97.7932	96.8765	96.5178	96.4402	94.9584	96.9582	98.6781	99.0553	98.7808	97.1444	97.4669	97.6426	95.6076	96.9271	96.9347	89.9197	97.3028	96.6164	98.6164	96.5772	97.4725	95.8045	95.9503	95.5068	97.3491	96.5323	96.4365	96.7732	98.5042	97.0047	98.239	98.194	98.3171	97.7637
2510.36	98.6646	98.5434	98.6213	97.2077	98.6788	98.1932	96.6815	97.0526	97.1882	93.3347	94.9115	94.6532	95.3238	95.9779	96.0273	97.8202	96.8691	96.4701	96.5162	94.9468	96.9673	98.629	99.1388	98.7765	97.1436	97.4317	97.6292	95.6511	96.9368	96.9299	89.9052	97.279	96.6844	98.5924	96.5639	97.3981	95.8271	96.0004	95.5787	97.3329	96.5658	96.4969	96.8314	98.5179	96.9815	98.1078	98.2494	98.3522	97.7673
2508.5	98.7328	98.528	98.6485	97.1945	98.6004	98.214	96.6911	97.0109	97.2308	93.4203	94.905	94.7037	95.3074	96.0021	96.0153	97.8375	96.8803	96.4503	96.5045	94.9338	96.9908	98.6487	99.1492	98.7606	97.1436	97.3692	97.6289	95.7034	96.9688	96.8963	89.8112	97.2895	96.8118	98.5478	96.544	97.3861	95.7898	95.9771	95.5902	97.3013	96.6462	96.5106	96.9023	98.5536	96.9493	98.0934	98.3171	98.3538	97.7068
2506.63	98.7766	98.526	98.6569	97.1604	98.6425	98.2058	96.6851	97.0037	97.2997	93.4421	94.9422	94.704	95.3578	96.0034	96.0305	97.8136	96.8916	96.5349	96.4111	95.0027	97.0023	98.7068	99.0439	98.7508	97.178	97.4001	97.6089	95.655	96.9612	96.8278	89.7023	97.3215	96.7723	98.637	96.4676	97.3935	95.6976	95.9621	95.5852	97.3208	96.6879	96.5138	96.8763	98.5175	96.9686	98.1933	98.2558	98.3759	97.6578
2504.77	98.7827	98.5201	98.6732	97.0823	98.7266	98.2236	96.7095	97.0601	97.3722	93.3416	95.0094	94.6376	95.4021	95.9581	96.1021	97.8086	96.9543	96.5703	96.3864	95.036	96.9618	98.6317	99.0281	98.7198	97.1823	97.4805	97.6597	95.5633	96.9047	96.8349	89.7365	97.2452	96.6933	98.6886	96.4166	97.3401	95.6573	95.9505	95.6414	97.3753	96.7205	96.4615	96.807	98.5229	97.0232	98.2028	98.2435	98.3735	97.6627
2502.91	98.7381	98.5324	98.6589	97.0921	98.7319	98.2682	96.8094	97.051	97.4021	93.2912	95.0103	94.6194	95.4152	95.9505	96.1476	97.8033	96.9288	96.4869	96.3979	94.998	97.012	98.6334	99.085	98.676	97.1438	97.4727	97.6993	95.5243	96.9046	96.8799	89.8161	97.2041	96.6608	98.7043	96.4116	97.3514	95.6988	95.9578	95.678	97.429	96.6795	96.4145	96.7439	98.5239	97.0685	98.157	98.2878	98.3753	97.7632
2501.04	98.6886	98.5355	98.6276	97.1558	98.7226	98.2508	96.7806	96.9792	97.3787	93.3634	94.9284	94.6495	95.4192	95.987	96.1265	97.8052	96.8764	96.4643	96.4282	95.0537	97.0971	98.6951	99.1239	98.7549	97.1298	97.4101	97.64	95.5618	96.8724	96.894	89.7932	97.1709	96.7094	98.7249	96.4265	97.3765	95.7577	95.9692	95.6745	97.4494	96.5893	96.4417	96.7343	98.5465	97.0751	98.0963	98.2893	98.3129	97.789
2499.18	98.7214	98.5137	98.623	97.1723	98.6889	98.238	96.7834	96.9878	97.3426	93.3922	94.9028	94.7096	95.3791	96.0612	96.08	97.8002	96.8746	96.5276	96.4506	95.1143	97.1272	98.7097	99.1479	98.8429	97.1461	97.3105	97.6029	95.619	96.7941	96.9048	89.8256	97.2	96.7396	98.6414	96.4404	97.3002	95.7832	96.0006	95.6394	97.4137	96.6057	96.5129	96.7706	98.5571	97.0721	98.0695	98.2477	98.2706	97.7382
2497.32	98.7389	98.5028	98.6612	97.179	98.6725	98.2043	96.812	96.9992	97.2943	93.4002	95.0226	94.7583	95.3532	96.1072	96.0721	97.8006	96.8703	96.5507	96.4731	95.0861	97.0697	98.7095	99.1214	98.7876	97.1702	97.332	97.5674	95.6231	96.7887	96.9302	89.7938	97.2487	96.7554	98.6058	96.5332	97.3182	95.7566	95.924	95.621	97.3558	96.6792	96.5857	96.7251	98.5329	97.0242	98.1371	98.2724	98.3159	97.7371
2495.45	98.7033	98.4783	98.6597	97.0987	98.7101	98.1559	96.7911	96.9759	97.2678	93.3816	95.0683	94.8223	95.3429	96.0912	96.058	97.8186	96.9106	96.5653	96.5086	95.0311	96.9503	98.7184	99.1368	98.7988	97.2345	97.3968	97.5924	95.5516	96.8476	96.9258	89.7428	97.2536	96.7425	98.6316	96.5584	97.3824	95.7394	95.8635	95.6379	97.3591	96.6952	96.5346	96.7671	98.5794	96.9821	98.1561	98.3077	98.4004	97.7558
2493.59	98.6928	98.4371	98.6016	97.0486	98.7299	98.1793	96.7933	96.9942	97.3065	93.415	95.011	94.8081	95.416	96.0148	96.0422	97.8327	96.9188	96.5441	96.4945	95.0127	96.9664	98.664	99.169	98.8189	97.1976	97.3886	97.632	95.5705	96.9031	96.8945	89.7274	97.2243	96.6863	98.6096	96.6105	97.452	95.7631	95.8898	95.6089	97.4097	96.6918	96.5321	96.8575	98.5421	97.0137	98.1518	98.2726	98.4517	97.7457
2491.72	98.7046	98.4601	98.5894	97.1298	98.7386	98.2348	96.8213	97.0654	97.3594	93.5496	95.0154	94.7473	95.433	95.9647	96.085	97.8794	96.8787	96.4981	96.4961	95.0509	97.0379	98.6178	99.1925	98.7883	97.1641	97.4266	97.6768	95.6169	96.8981	96.8365	89.7309	97.1992	96.6448	98.6392	96.563	97.4385	95.8069	95.925	95.5542	97.3951	96.7076	96.6143	96.8306	98.4754	97.0585	98.0916	98.2036	98.3385	97.7046
2489.86	98.6483	98.5198	98.6364	97.0914	98.7473	98.1845	96.8258	97.1252	97.3411	93.5535	95.086	94.7227	95.3712	95.9959	96.1734	97.9163	96.8256	96.5033	96.4839	95.0594	96.9908	98.6883	99.162	98.8052	97.2619	97.4581	97.6959	95.6382	96.9124	96.8447	89.7933	97.204	96.6836	98.7385	96.4612	97.3651	95.7699	95.9825	95.6079	97.3003	96.7653	96.6131	96.8142	98.4697	97.0116	98.0647	98.1847	98.2977	97.7079
2488	98.6234	98.5758	98.6638	97.0416	98.7528	98.1835	96.826	97.1031	97.3571	93.5047	95.1291	94.6896	95.4041	96.0193	96.2547	97.9168	96.8532	96.4744	96.4587	95.0706	97.0235	98.7178	99.0938	98.8159	97.2865	97.3996	97.656	95.667	96.9221	96.8617	89.7897	97.2011	96.7714	98.7209	96.4299	97.3239	95.7708	95.9908	95.6904	97.3502	96.7324	96.5714	96.834	98.4978	96.9906	98.0855	98.2987	98.3272	97.7569
2486.13	98.64	98.472	98.641	97.0921	98.7405	98.2377	96.8292	97.0668	97.4254	93.5406	95.0768	94.7364	95.4538	96.0161	96.2069	97.8673	96.9158	96.4319	96.5052	95.0882	97.0569	98.7341	99.1177	98.8093	97.2547	97.432	97.6095	95.6298	96.9005	96.8845	89.7767	97.2032	96.7674	98.6528	96.4324	97.3446	95.8761	95.9029	95.6891	97.378	96.6378	96.5694	96.8497	98.4808	97.065	98.1206	98.3824	98.357	97.7377
2484.27	98.671	98.3499	98.6408	97.1187	98.7531	98.2378	96.7949	97.0841	97.4251	93.4942	95.0597	94.8368	95.4559	96.0524	96.1632	97.8417	96.909	96.5108	96.5457	95.055	97.0261	98.7403	99.1511	98.7831	97.2332	97.441	97.6279	95.5992	96.889	96.845	89.7919	97.2932	96.7186	98.6582	96.5086	97.3604	95.8427	95.8388	95.6224	97.3925	96.5762	96.5256	96.8385	98.5022	97.0986	98.1828	98.3361	98.3475	97.7117
2482.41	98.6827	98.3702	98.6255	97.089	98.7016	98.2198	96.7296	97.0812	97.3803	93.4696	95.1198	94.8747	95.4063	96.1062	96.199	97.8614	96.9086	96.5778	96.4964	95.0708	97.0447	98.6731	99.1361	98.7525	97.1833	97.3788	97.6344	95.6433	96.9095	96.8284	89.746	97.2737	96.7453	98.6745	96.5524	97.3443	95.7877	95.9408	95.563	97.3823	96.5938	96.5748	96.7417	98.5215	97.0452	98.1735	98.2566	98.317	97.7278
2480.54	98.7345	98.4629	98.6465	97.1094	98.6871	98.2084	96.7729	97.0474	97.3493	93.5363	95.1014	94.8852	95.4593	96.1293	96.1842	97.8453	96.9428	96.5878	96.4495	95.0998	97.0846	98.6845	99.1072	98.7453	97.2133	97.4115	97.6148	95.5734	96.9086	96.8554	89.7662	97.2147	96.7729	98.6698	96.5474	97.3289	95.8038	95.9876	95.6208	97.3667	96.6244	96.5702	96.7857	98.5377	97.0162	98.0918	98.2474	98.315	97.7548
2478.68	98.7623	98.542	98.6593	97.1325	98.7399	98.227	96.8773	97.0579	97.3251	93.553	95.0943	94.8451	95.5551	96.146	96.1036	97.8646	96.9201	96.5376	96.4952	95.0681	97.0675	98.7587	99.0481	98.7061	97.3261	97.4634	97.6415	95.5488	96.8677	96.9113	89.7946	97.2416	96.7528	98.6909	96.5686	97.373	95.8328	95.9133	95.6458	97.4442	96.6739	96.5466	96.8142	98.5307	96.9944	98.0927	98.2425	98.3235	97.7855
2476.82	98.7489	98.5322	98.65	97.1636	98.7367	98.237	96.8496	97.1062	97.3721	93.5096	95.1487	94.8457	95.5299	96.0999	96.0932	97.8851	96.9098	96.5094	96.5229	95.0644	97.0452	98.7305	99.1107	98.7062	97.3282	97.5166	97.7033	95.5819	96.8843	96.9741	89.8318	97.3419	96.7264	98.659	96.5925	97.3987	95.8484	95.9248	95.646	97.4481	96.633	96.6109	96.7987	98.5094	97.0649	98.1429	98.2243	98.3653	97.7625
2474.95	98.7396	98.528	98.6927	97.1931	98.7335	98.1623	96.7962	97.0689	97.4428	93.5206	95.1677	94.9673	95.4797	96.0445	96.1829	97.8189	96.9405	96.5272	96.4672	95.0357	97.0512	98.7276	99.1956	98.7199	97.2522	97.5082	97.7183	95.6059	96.933	97.0198	89.8394	97.3517	96.671	98.6354	96.5526	97.4126	95.8022	95.9887	95.6096	97.4244	96.6457	96.5818	96.8012	98.4729	97.1346	98.173	98.2456	98.4198	97.7248
2473.09	98.6511	98.6013	98.7681	97.1283	98.7559	98.1457	96.8334	96.998	97.4338	93.5625	95.1687	94.9468	95.5193	96.0601	96.1944	97.8055	96.9565	96.5347	96.4663	95.0297	97.0793	98.7508	99.2065	98.7823	97.2208	97.4405	97.7123	95.6083	96.9812	96.9969	89.7586	97.2741	96.648	98.5889	96.4567	97.4589	95.7972	96.0378	95.5968	97.4423	96.6693	96.5139	96.7809	98.4379	97.0875	98.1483	98.2152	98.3766	97.7332
2471.22	98.6152	98.6248	98.8127	97.0885	98.8193	98.2045	96.8383	97.0169	97.4128	93.5755	95.1947	94.8033	95.5603	96.084	96.1841	97.8844	96.8994	96.5422	96.5288	95.0854	97.0247	98.7017	99.2224	98.8462	97.2684	97.5005	97.7138	95.5958	96.9802	96.9125	89.733	97.2786	96.7162	98.5482	96.4535	97.4982	95.8213	95.9742	95.7429	97.454	96.6866	96.5569	96.838	98.4728	96.9783	98.1364	98.1874	98.3208	97.8111
2469.36	98.6683	98.5994	98.781	97.0934	98.8296	98.2787	96.8056	97.0607	97.441	93.5817	95.1582	94.7851	95.5702	96.0571	96.1961	97.8646	96.8973	96.5751	96.5563	95.0918	97.0326	98.6113	99.1955	98.8346	97.3131	97.5758	97.7424	95.5973	96.9825	96.9322	89.7644	97.3263	96.7207	98.6219	96.5283	97.4561	95.82	95.9406	95.8003	97.458	96.7358	96.5898	96.833	98.5272	96.9442	98.118	98.1974	98.3429	97.8443
2467.5	98.7155	98.5534	98.7323	97.0931	98.7869	98.2954	96.8356	97.0827	97.4644	93.6106	95.1752	94.8591	95.531	95.9907	96.2011	97.8168	96.9732	96.6061	96.5161	95.0915	97.0944	98.6047	99.0762	98.8048	97.2824	97.5384	97.7144	95.6121	96.8846	96.9245	89.7171	97.3488	96.7126	98.6831	96.6121	97.4443	95.8502	95.9606	95.7766	97.417	96.7359	96.6089	96.7881	98.535	97.0614	98.0816	98.1962	98.4254	97.8162
2465.63	98.7129	98.4769	98.7405	97.0991	98.734	98.2724	96.8717	97.1319	97.4124	93.6249	95.2804	94.8695	95.4895	96.0319	96.2149	97.8053	96.9537	96.5574	96.4828	95.1383	97.115	98.7117	99.0669	98.8015	97.2783	97.4526	97.71	95.6165	96.8836	96.9028	89.7533	97.2622	96.7525	98.6729	96.6308	97.4266	95.892	96.0005	95.7465	97.4271	96.6958	96.6407	96.8602	98.4949	97.1064	98.0664	98.1935	98.3816	97.7613
2463.77	98.7514	98.4458	98.7094	97.1008	98.6771	98.218	96.8602	97.1453	97.3722	93.6493	95.277	94.8692	95.4835	96.1396	96.182	97.763	96.8678	96.5133	96.5132	95.1539	97.0722	98.6488	99.1332	98.8229	97.3213	97.4176	97.7331	95.6101	96.951	96.8865	89.8609	97.1548	96.7244	98.7011	96.5556	97.3986	95.8201	95.9918	95.6806	97.4622	96.663	96.6178	96.8637	98.442	97.0824	98.0978	98.272	98.2816	97.733
2461.91	98.6535	98.479	98.6129	97.1363	98.6932	98.194	96.8098	97.0647	97.3703	93.6292	95.1628	94.9015	95.4678	96.1843	96.1759	97.7719	96.8587	96.5266	96.5793	95.1189	97.0291	98.5576	99.1521	98.7977	97.3173	97.4516	97.7308	95.6112	96.9537	96.8739	89.8374	97.1746	96.7486	98.6732	96.5354	97.3712	95.7825	96.0037	95.6709	97.4177	96.7142	96.6298	96.8769	98.5101	97.048	98.169	98.29	98.2557	97.8271
2460.04	98.5331	98.4888	98.5968	97.1668	98.7251	98.1837	96.7928	97.0277	97.3545	93.5603	95.081	94.9409	95.5144	96.1701	96.1794	97.7926	96.9446	96.5022	96.5754	95.0235	97.0312	98.5726	99.1311	98.7126	97.2278	97.492	97.7084	95.6474	96.9787	96.8676	89.7806	97.1895	96.8097	98.7124	96.5342	97.3676	95.8511	96.0126	95.6467	97.3635	96.7782	96.6342	96.8395	98.593	97.1001	98.1855	98.2372	98.2569	97.8829
2458.18	98.5983	98.442	98.6573	97.1055	98.7443	98.2042	96.7973	97.1135	97.3598	93.5582	95.0954	94.9371	95.5171	96.1722	96.1602	97.8174	96.9695	96.5343	96.4837	95.0172	97.0198	98.6558	99.189	98.7307	97.2035	97.46	97.6442	95.63	96.8957	96.8961	89.7948	97.2317	96.7649	98.7525	96.4981	97.4093	95.838	96.003	95.6578	97.4209	96.7897	96.6024	96.7777	98.5602	97.1374	98.1215	98.2398	98.2685	97.8361
2456.31	98.7044	98.4488	98.6954	97.0812	98.7954	98.1981	96.7889	97.1811	97.3565	93.6306	95.1222	94.9479	95.4356	96.1912	96.1394	97.8628	96.8533	96.5695	96.4099	95.0781	96.9883	98.7103	99.2063	98.7651	97.203	97.4261	97.6641	95.6681	96.7775	96.9196	89.8065	97.3187	96.7304	98.7361	96.4684	97.3879	95.8052	96.0568	95.7014	97.4157	96.7555	96.6357	96.7891	98.4978	97.1015	98.0596	98.1554	98.2789	97.7456
2454.45	98.692	98.5011	98.6624	97.1277	98.7584	98.1619	96.7956	97.1131	97.3329	93.663	95.1326	94.9731	95.4728	96.1788	96.1543	97.8606	96.78	96.5235	96.4243	95.0307	96.9441	98.6719	99.1416	98.6894	97.1218	97.449	97.7176	95.6758	96.8274	96.9135	89.8078	97.3087	96.7064	98.7179	96.5123	97.3407	95.8808	96.0662	95.7019	97.3885	96.7195	96.5689	96.7678	98.4882	97.0546	98.075	98.1022	98.3009	97.6312
2452.59	98.6432	98.536	98.6019	97.091	98.687	98.1912	96.8118	97.034	97.3847	93.5929	95.1499	94.9359	95.6093	96.1169	96.1156	97.8229	96.7782	96.4329	96.4928	94.9823	96.9842	98.6175	99.1068	98.7004	97.1098	97.4436	97.6934	95.6312	96.9069	96.9103	89.7006	97.2763	96.684	98.6274	96.5828	97.4085	95.8753	95.9947	95.6643	97.4371	96.6956	96.5751	96.7384	98.4883	97.019	98.076	98.1542	98.2962	97.6278
2450.72	98.6083	98.5208	98.5812	97.0597	98.702	98.2382	96.8404	97.0215	97.4772	93.5675	95.1533	94.9689	95.5223	96.0603	96.0925	97.7953	96.8165	96.4457	96.5535	95.0492	97.0745	98.6217	99.0515	98.7838	97.2571	97.3807	97.6303	95.5889	96.9113	96.8712	89.7162	97.2494	96.6886	98.6431	96.5832	97.4856	95.8616	96.0326	95.6822	97.4387	96.6795	96.6726	96.8079	98.504	97.0302	98.0387	98.215	98.293	97.7557
2448.86	98.594	98.4842	98.5973	97.0561	98.7789	98.2442	96.8665	97.049	97.4831	93.6068	95.1859	95.0451	95.4227	96.0633	96.1532	97.7935	96.897	96.5098	96.6115	95.0587	97.061	98.6293	99.0428	98.7686	97.3791	97.3957	97.635	95.551	96.9246	96.8102	89.803	97.1873	96.7265	98.6545	96.5456	97.4011	95.9075	96.0537	95.7184	97.4275	96.7496	96.6928	96.8659	98.5229	97.0801	98.025	98.2374	98.2973	97.8038
2447	98.5949	98.4958	98.6595	97.1084	98.8232	98.1955	96.8626	97.0643	97.4416	93.6919	95.2792	95.0044	95.4363	96.0879	96.175	97.8324	96.9634	96.4585	96.6131	94.9659	97.0444	98.6389	99.1807	98.8008	97.4019	97.4481	97.7048	95.5825	96.934	96.8558	89.78	97.1277	96.7827	98.5957	96.5231	97.3801	95.8552	96.0289	95.749	97.4486	96.8098	96.6635	96.9019	98.4947	97.1202	98.091	98.2354	98.3401	97.7721
2445.13	98.716	98.5595	98.6586	97.0843	98.7576	98.2002	96.8628	97.061	97.4162	93.7249	95.3393	94.8816	95.4502	96.1298	96.2437	97.8518	96.9337	96.438	96.5561	94.9803	97.0411	98.6268	99.2103	98.8089	97.3324	97.4945	97.7209	95.6412	96.8606	96.8822	89.798	97.2143	96.8183	98.6274	96.5113	97.4064	95.8395	95.9952	95.7587	97.4528	96.7247	96.6663	96.9002	98.4779	97.1279	98.0765	98.2435	98.3795	97.8485
2443.27	98.7629	98.6104	98.5882	97.103	98.7021	98.2575	96.8672	97.0937	97.4316	93.6519	95.2872	94.8675	95.5198	96.159	96.2742	97.8681	96.8909	96.5225	96.5404	95.0812	96.9834	98.5447	99.1325	98.7402	97.2824	97.6334	97.6981	95.6955	96.8771	96.8825	89.8898	97.2505	96.7758	98.6804	96.5707	97.4014	95.8795	95.9897	95.7505	97.4536	96.7128	96.6615	96.8797	98.5704	97.0766	98.041	98.2752	98.4028	97.9295
2441.41	98.5882	98.5657	98.6072	97.1518	98.722	98.2426	96.8799	97.1086	97.457	93.6639	95.218	94.9539	95.6259	96.1885	96.2323	97.9111	96.93	96.6163	96.5012	95.0732	96.9799	98.5691	99.0999	98.6839	97.2575	97.6526	97.7015	95.6917	96.915	96.9067	89.8669	97.2877	96.7632	98.6469	96.5986	97.4305	95.8585	96.0382	95.7713	97.4859	96.7886	96.7057	96.8884	98.6021	97.0834	98.1205	98.2988	98.4093	97.8989
2439.54	98.5376	98.4646	98.7258	97.1429	98.7086	98.1772	96.8656	97.0819	97.4146	93.7232	95.2589	95.0348	95.6315	96.1383	96.1993	97.9277	97.0284	96.6763	96.4666	95.0307	97.0474	98.6661	99.1494	98.7434	97.2474	97.5518	97.7431	95.6739	96.9344	96.8884	89.8105	97.3556	96.7986	98.6079	96.5309	97.4353	95.8384	96.0503	95.7138	97.4919	96.8386	96.6872	96.8782	98.5001	97.0646	98.1681	98.2097	98.3926	97.8995
2437.68	98.6121	98.4688	98.6998	97.1045	98.7137	98.1435	96.8424	97.1042	97.3763	93.7253	95.255	95.0898	95.5688	96.1435	96.1693	97.8925	97.021	96.6272	96.5339	95.0352	97.0551	98.7384	99.263	98.7807	97.2209	97.5037	97.7436	95.6798	96.9373	96.9182	89.8168	97.3707	96.773	98.6461	96.5633	97.4192	95.8595	96.0094	95.6958	97.4682	96.8974	96.6535	96.8413	98.3676	97.036	98.1709	98.1794	98.3054	97.8845
2435.81	98.6653	98.4549	98.6197	97.0982	98.78	98.1174	96.8431	97.2009	97.4306	93.6742	95.2426	95.0274	95.5891	96.2	96.161	97.8489	96.9491	96.5219	96.6068	95.0686	96.9829	98.7435	99.2751	98.787	97.2596	97.4894	97.7315	95.6977	96.9221	96.9958	89.8139	97.3501	96.7422	98.6854	96.6106	97.3862	95.8794	95.9727	95.7598	97.4983	96.8885	96.6604	96.7753	98.3336	97.0982	98.1255	98.2706	98.2203	97.8055
2433.95	98.6741	98.4376	98.6493	97.1622	98.7846	98.1783	96.8868	97.1986	97.4812	93.6975	95.2998	94.9337	95.5823	96.2254	96.1824	97.8372	96.8979	96.46	96.5688	95.0932	96.9836	98.7177	99.1417	98.806	97.3062	97.5475	97.7571	95.7013	96.8579	96.9106	89.8273	97.3633	96.7432	98.6815	96.5189	97.3769	95.8975	96.0063	95.7927	97.4952	96.88	96.6593	96.7772	98.4151	97.0749	98.1074	98.33	98.2686	97.7271
2432.09	98.6514	98.4722	98.6899	97.1525	98.7079	98.2664	96.9385	97.1022	97.4445	93.7027	95.2802	95.0269	95.5597	96.1929	96.2186	97.8571	96.8691	96.5014	96.4697	95.0262	97.0444	98.6752	99.1053	98.7716	97.3142	97.5669	97.7677	95.6807	96.8632	96.7892	89.8277	97.3767	96.6863	98.6211	96.5032	97.3873	95.9141	96.1334	95.7812	97.479	96.8259	96.7827	96.8153	98.5438	97.064	98.1488	98.2852	98.3637	97.7804
2430.22	98.5643	98.4557	98.6961	97.087	98.6722	98.2521	96.9053	97.0804	97.3927	93.6868	95.2683	95.1476	95.5051	96.1763	96.2514	97.8479	96.8487	96.5163	96.4178	95.0164	97.0718	98.6562	99.1881	98.8235	97.3206	97.4733	97.7532	95.6522	96.9384	96.7898	89.788	97.2961	96.7151	98.5937	96.5578	97.3866	95.9009	96.1353	95.7565	97.4725	96.8145	96.8054	96.7991	98.6242	97.0807	98.1343	98.2007	98.3797	97.8063
2428.36	98.4955	98.3545	98.6265	97.0822	98.7155	98.2342	96.8193	97.1072	97.4472	93.6951	95.3534	95.1041	95.4875	96.2259	96.2672	97.85	96.8913	96.5282	96.469	95.1274	97.0836	98.6554	99.1963	98.8899	97.3097	97.4252	97.7604	95.6298	96.9456	96.84	89.8229	97.2159	96.811	98.6249	96.505	97.3385	95.9783	96.111	95.7446	97.5232	96.8389	96.6618	96.7964	98.5554	97.0659	98.0855	98.2059	98.3704	97.74
2426.5	98.5482	98.3994	98.5251	97.1054	98.8128	98.2957	96.8112	97.0874	97.4551	93.6708	95.3861	95.0416	95.5922	96.239	96.2601	97.9056	96.9364	96.5637	96.5559	95.1737	97.0578	98.662	99.1533	98.8461	97.2998	97.4625	97.6984	95.6554	96.9076	96.8559	89.8482	97.2141	96.8279	98.6161	96.4482	97.3321	95.9776	96.1223	95.8179	97.5217	96.8323	96.7	96.8382	98.5029	97.094	98.0836	98.1972	98.3711	97.7165
2424.63	98.5683	98.4882	98.5918	97.1482	98.8546	98.2896	96.8824	97.0749	97.4183	93.6763	95.3285	95.0114	95.618	96.1581	96.2106	97.9094	96.9192	96.6087	96.5722	95.1726	97.0596	98.69	99.1503	98.7961	97.2859	97.5212	97.665	95.6705	96.8631	96.8716	89.8837	97.2466	96.7428	98.6587	96.5295	97.428	95.8877	96.0881	95.8336	97.4862	96.8288	96.8236	96.8115	98.5431	97.0968	98.1268	98.17	98.3701	97.7435
2422.77	98.5857	98.4815	98.6878	97.1835	98.77	98.2356	96.9245	97.0904	97.4677	93.7284	95.2837	95.0478	95.5948	96.1043	96.2703	97.8674	96.9604	96.6327	96.5404	95.1191	97.0548	98.6641	99.2001	98.75	97.3171	97.5424	97.6871	95.6199	96.8633	96.9093	89.8708	97.2522	96.7866	98.6893	96.6061	97.42	95.8824	96.0542	95.7369	97.5221	96.8583	96.7651	96.8278	98.5338	97.1176	98.1629	98.2355	98.3819	97.7834
2420.91	98.6072	98.5045	98.6665	97.1088	98.6821	98.2425	96.8882	97.1222	97.4799	93.7563	95.283	95.0926	95.6218	96.1522	96.2602	97.8665	96.9734	96.6516	96.5135	95.0633	97.0149	98.637	99.2551	98.7792	97.3617	97.5588	97.7175	95.6482	96.9057	96.9234	89.8739	97.2808	96.8483	98.6855	96.5584	97.4046	95.8992	95.9685	95.7144	97.505	96.8447	96.7491	96.8829	98.5119	97.1451	98.2076	98.3511	98.3614	97.7529
2419.04	98.7228	98.5834	98.6673	97.0126	98.6989	98.2665	96.852	97.1842	97.4552	93.7656	95.3004	95.0664	95.6231	96.2463	96.1963	97.903	96.9762	96.6451	96.4887	95.0706	97.0232	98.7047	99.2576	98.8232	97.3188	97.6135	97.7147	95.7516	96.9559	96.8888	89.8399	97.2549	96.8183	98.72	96.5244	97.4347	95.8702	95.9677	95.7696	97.4824	96.8523	96.8083	96.8517	98.4758	97.0922	98.1917	98.3025	98.3451	97.7574
2417.18	98.7258	98.5453	98.6991	97.0504	98.7495	98.2409	96.8841	97.2101	97.514	93.7689	95.3057	95.0039	95.6095	96.3067	96.2489	97.9326	97.0362	96.6304	96.5227	95.1107	97.0704	98.798	99.223	98.7948	97.3039	97.5897	97.7544	95.7891	97.0031	96.89	89.7765	97.2307	96.7981	98.7036	96.5742	97.4282	95.8369	96.0888	95.8314	97.5066	96.8391	96.765	96.8713	98.5219	97.0342	98.1754	98.1778	98.3145	97.7737
2415.31	98.6744	98.4694	98.6527	97.1527	98.7539	98.2067	96.9343	97.1727	97.5407	93.734	95.2654	94.9845	95.6064	96.2971	96.2826	97.8611	96.9887	96.636	96.5752	95.1399	97.0399	98.7703	99.1506	98.7963	97.3632	97.5624	97.7742	95.6988	96.9889	96.8972	89.8554	97.2751	96.8015	98.687	96.6606	97.4327	95.8363	96.1211	95.8045	97.4745	96.8419	96.6379	96.8484	98.559	97.0679	98.218	98.2262	98.2766	97.7666
2413.45	98.6724	98.4369	98.649	97.1695	98.7609	98.1857	96.9796	97.1499	97.4815	93.6867	95.2337	95.0813	95.622	96.2401	96.3081	97.8452	96.9558	96.6022	96.5913	95.1004	97.0376	98.7092	99.1414	98.8215	97.3961	97.575	97.7453	95.6795	96.9073	96.8943	89.9421	97.341	96.817	98.6729	96.6465	97.447	95.8852	96.0669	95.7702	97.4376	96.8001	96.6585	96.8307	98.4795	97.0759	98.1862	98.2888	98.2918	97.7777
2411.59	98.7334	98.4037	98.6675	97.1675	98.8311	98.1942	97.0083	97.1676	97.4684	93.7321	95.2851	95.1224	95.6105	96.2786	96.3512	97.8757	96.948	96.5319	96.5744	95.0924	97.1004	98.6881	99.1962	98.917	97.4057	97.5627	97.7828	95.7597	96.8599	96.9575	89.8552	97.3185	96.7935	98.623	96.6148	97.4382	95.9137	96.0064	95.7842	97.4423	96.7953	96.8108	96.8711	98.4493	97.0533	98.1355	98.2966	98.4036	97.7836
2409.72	98.6674	98.4037	98.6507	97.1368	98.8041	98.2166	96.9919	97.2036	97.4862	93.7938	95.3765	95.089	95.6334	96.2629	96.3017	97.8799	96.9742	96.5422	96.6234	95.1231	97.1513	98.6617	99.2745	98.916	97.4341	97.603	97.8094	95.7504	96.9437	96.9428	89.8295	97.257	96.8118	98.643	96.6146	97.3824	95.9526	96.0092	95.7857	97.5049	96.8477	96.8406	96.9386	98.4659	97.0585	98.1965	98.3598	98.4436	97.8155
2407.86	98.5584	98.4891	98.6856	97.1233	98.7688	98.2233	96.9307	97.2312	97.4396	93.8258	95.417	95.1378	95.6499	96.2131	96.2999	97.914	96.9648	96.5945	96.6645	95.1093	97.1239	98.7434	99.2963	98.8158	97.4294	97.6072	97.794	95.7463	96.9832	96.9608	89.8387	97.1879	96.8112	98.7205	96.5887	97.3978	95.9409	96.0635	95.7774	97.5437	96.8693	96.8218	96.9409	98.4457	97.1184	98.2528	98.3634	98.3964	97.8157
2406	98.5999	98.5417	98.7064	97.1913	98.7902	98.2909	96.9263	97.2488	97.4236	93.8047	95.3902	95.1412	95.6449	96.2676	96.3215	97.9086	96.9412	96.6379	96.6215	95.1304	97.0931	98.7729	99.295	98.8295	97.3528	97.5908	97.7762	95.7452	97.0396	97.0101	89.8474	97.232	96.7761	98.7607	96.5948	97.4978	95.946	96.1502	95.795	97.5481	96.9103	96.8494	96.9156	98.4469	97.1942	98.1691	98.298	98.385	97.876
2404.13	98.6742	98.5505	98.7277	97.2441	98.7969	98.3469	96.9852	97.2286	97.4611	93.795	95.4125	95.0815	95.6698	96.3066	96.3482	97.9267	96.9084	96.6454	96.564	95.1458	97.039	98.7694	99.2732	98.9058	97.3852	97.5491	97.7967	95.7503	97.0187	96.9764	89.8992	97.3625	96.8135	98.7574	96.6167	97.5024	95.9339	96.1856	95.8669	97.5779	96.9668	96.7854	96.9009	98.5318	97.2366	98.1172	98.2785	98.359	97.9147
2402.27	98.6526	98.5918	98.723	97.2406	98.8115	98.3086	96.9941	97.1942	97.4924	93.8206	95.4636	95.1053	95.6874	96.2453	96.3568	97.9619	96.9469	96.6213	96.5359	95.1378	97.0028	98.7771	99.2566	98.9414	97.4041	97.5724	97.8091	95.832	96.9063	96.9275	89.9167	97.3841	96.8428	98.7862	96.6059	97.4764	95.8605	96.1655	95.9119	97.6135	96.9317	96.7213	96.8707	98.5488	97.2033	98.1698	98.252	98.3514	97.8192
2400.4	98.6347	98.5714	98.6817	97.1509	98.7714	98.27	96.9569	97.1966	97.4975	93.831	95.4092	95.1695	95.7159	96.2373	96.3216	97.932	97.0084	96.5879	96.5775	95.1689	97.029	98.7144	99.296	98.9057	97.3705	97.6516	97.7992	95.8339	96.8768	96.9399	89.8977	97.3212	96.8658	98.8033	96.6253	97.45	95.8901	96.1377	95.8157	97.6267	96.8662	96.7491	96.8961	98.5221	97.0939	98.2117	98.2511	98.3737	97.7574
2398.54	98.6508	98.4903	98.6803	97.1328	98.7876	98.2301	96.9467	97.2288	97.4904	93.8325	95.3869	95.1784	95.6818	96.3148	96.3262	97.8897	97.0317	96.5978	96.6502	95.1663	97.0458	98.677	99.3038	98.8556	97.4029	97.6749	97.8011	95.7434	96.8704	96.9355	89.8913	97.321	96.8877	98.7564	96.6058	97.4493	95.9541	96.0991	95.7528	97.6285	96.8441	96.8763	96.946	98.486	97.0822	98.1629	98.2988	98.3622	97.7866
2396.68	98.6193	98.5055	98.7242	97.1487	98.8658	98.1935	96.9712	97.2548	97.4899	93.8432	95.4404	95.1995	95.6196	96.3104	96.3297	97.8998	97.0352	96.6098	96.6325	95.1574	97.0328	98.7262	99.2823	98.877	97.4284	97.6352	97.7977	95.6995	96.8914	96.9377	89.8732	97.3733	96.8192	98.7036	96.567	97.5176	95.9368	96.1302	95.7717	97.623	96.8566	96.8789	96.9199	98.4443	97.1321	98.1527	98.311	98.408	97.8432
2394.81	98.6275	98.5447	98.7461	97.1999	98.871	98.2099	96.9816	97.2876	97.5036	93.8127	95.4864	95.2241	95.6381	96.2888	96.35	97.9323	97.0509	96.6211	96.5853	95.1732	97.0111	98.7779	99.2777	98.9164	97.4236	97.5942	97.8324	95.752	96.9468	96.9834	89.8737	97.3103	96.8389	98.6812	96.6311	97.5407	95.9254	96.1906	95.846	97.6492	96.8749	96.8389	96.899	98.4796	97.1352	98.2357	98.3051	98.4216	97.8488
2392.95	98.671	98.5476	98.7473	97.2119	98.8362	98.2422	96.9846	97.3144	97.5625	93.7967	95.4927	95.1949	95.6985	96.2701	96.3684	97.9505	97.1006	96.6215	96.5936	95.185	97.0256	98.8168	99.2583	98.8864	97.4295	97.6115	97.8835	95.7964	96.917	97.0121	89.918	97.2153	96.8982	98.7065	96.6893	97.5567	95.9083	96.1666	95.8494	97.6542	96.9119	96.8562	96.9316	98.5415	97.1363	98.23	98.3098	98.4019	97.8155
2391.09	98.7167	98.592	98.7667	97.2133	98.83	98.2754	97.0421	97.3012	97.5788	93.8402	95.432	95.1581	95.7036	96.2639	96.2897	97.9968	97.0934	96.6316	96.5989	95.2188	97.0679	98.8042	99.2557	98.8548	97.4627	97.6547	97.9062	95.7895	96.9339	96.9834	89.9803	97.2147	96.8344	98.7901	96.6577	97.5242	95.9276	96.1094	95.8367	97.6401	96.9313	96.8372	96.9877	98.5169	97.1636	98.195	98.3048	98.4227	97.8752
2389.22	98.6855	98.6227	98.7647	97.1701	98.8278	98.2633	97.0495	97.2865	97.5382	93.8524	95.386	95.1454	95.6632	96.2902	96.2789	98.019	97.0713	96.715	96.5707	95.2354	97.0763	98.7883	99.2746	98.8917	97.4935	97.6469	97.8571	95.7898	96.9597	96.9518	89.9202	97.2525	96.7529	98.8243	96.652	97.4582	95.9733	96.0668	95.8534	97.6114	96.981	96.7895	96.9688	98.5257	97.1933	98.1539	98.3017	98.4604	97.9071
2387.36	98.7016	98.6109	98.7447	97.115	98.7843	98.2725	96.9708	97.2663	97.5158	93.8319	95.4282	95.1382	95.6545	96.3163	96.3381	97.9662	97.0653	96.7245	96.5408	95.2175	97.0844	98.7661	99.3015	98.9433	97.4807	97.5595	97.8538	95.7737	96.987	96.9488	89.8314	97.27	96.7674	98.762	96.6706	97.4848	95.9227	96.0677	95.8324	97.6398	96.9581	96.8001	96.9156	98.5583	97.1822	98.1602	98.2653	98.4565	97.8362
2385.5	98.763	98.5802	98.7927	97.1202	98.7455	98.29	96.9423	97.231	97.5347	93.7714	95.4614	95.1265	95.6335	96.3617	96.368	97.9145	97.0221	96.6732	96.5242	95.1724	97.044	98.7974	99.2621	98.9569	97.432	97.5664	97.8865	95.7466	96.993	96.9298	89.8393	97.261	96.8287	98.6886	96.6686	97.4958	95.8278	96.1101	95.8252	97.618	96.8845	96.8587	96.8549	98.5402	97.1753	98.1867	98.2431	98.4085	97.7894
2383.63	98.7285	98.5735	98.8176	97.1123	98.7867	98.2521	96.9505	97.1955	97.5644	93.6741	95.4442	95.0712	95.6338	96.3848	96.3473	97.934	96.9893	96.5994	96.5605	95.1327	97.0154	98.7726	99.2135	98.9409	97.4012	97.6328	97.849	95.7521	96.9849	96.9196	89.807	97.2498	96.8213	98.7052	96.6625	97.4549	95.8166	96.1076	95.8086	97.5272	96.8494	96.7977	96.875	98.5187	97.1476	98.1646	98.2482	98.4205	97.7638
2381.77	98.6991	98.5831	98.7218	97.0789	98.8183	98.2197	96.9124	97.1597	97.5106	93.618	95.3739	94.9709	95.6609	96.3163	96.3086	97.9521	97.0141	96.5441	96.6106	95.113	97.0158	98.7236	99.2194	98.9072	97.3746	97.6189	97.7651	95.7447	96.9566	96.9385	89.6976	97.2525	96.7438	98.7409	96.6618	97.4575	95.8484	96.0828	95.7625	97.5082	96.796	96.6744	96.9227	98.5263	97.1051	98.1454	98.2364	98.3836	97.7496
2379.9	98.6988	98.5499	98.6235	97.0606	98.8582	98.2677	96.8506	97.1588	97.4376	93.6384	95.2932	94.9142	95.6895	96.2138	96.2454	97.9235	97.0323	96.5276	96.6282	95.1255	97.0066	98.6902	99.2015	98.8826	97.4085	97.599	97.7609	95.696	96.92	96.9389	89.6735	97.1954	96.7774	98.7635	96.6414	97.4944	95.807	96.0065	95.7154	97.5069	96.7854	96.5995	96.9564	98.524	97.0619	98.0895	98.2129	98.2368	97.747
2378.04	98.6991	98.4911	98.6003	97.0538	98.8471	98.2759	96.8161	97.1586	97.4075	93.6461	95.2765	94.8913	95.7189	96.1488	96.1826	97.9112	96.9537	96.4783	96.557	95.1273	96.9774	98.5804	99.1673	98.8393	97.361	97.5294	97.7728	95.6228	96.8693	96.8997	89.666	97.085	96.8521	98.7592	96.5911	97.4702	95.7904	95.921	95.641	97.4445	96.8102	96.5157	96.8849	98.5015	97.0016	98.0342	98.2018	98.1775	97.738
2376.18	98.6055	98.4753	98.6475	97.0437	98.7717	98.2488	96.8046	97.1176	97.4164	93.5946	95.1967	94.9074	95.629	96.1353	96.1996	97.9271	96.919	96.4389	96.4972	95.0567	96.945	98.608	99.1929	98.8367	97.2434	97.4306	97.7658	95.6043	96.8162	96.8574	89.6114	97.0898	96.7837	98.7337	96.5718	97.4545	95.7384	95.8959	95.6095	97.3882	96.7901	96.4069	96.7677	98.4769	97.0414	98.069	98.2662	98.2159	97.6936
2374.31	98.5674	98.4466	98.6739	97.0279	98.7095	98.2277	96.7602	97.102	97.4005	93.5272	95.1407	94.9568	95.5614	96.1382	96.2809	97.8918	96.9181	96.4352	96.4895	94.9376	96.9701	98.6954	99.2041	98.8755	97.2569	97.3952	97.7754	95.5929	96.835	96.8524	89.5851	97.1634	96.6987	98.694	96.5918	97.4621	95.6961	95.9301	95.6117	97.3534	96.7062	96.3672	96.7875	98.4507	97.0882	98.0469	98.2582	98.2076	97.6712
2372.45	98.5172	98.3828	98.6558	97.0537	98.7387	98.2173	96.7509	97.1225	97.3313	93.5364	95.2618	94.9526	95.5679	96.1189	96.2907	97.8533	96.8881	96.4235	96.446	94.9257	96.9457	98.6599	99.2052	98.9122	97.3316	97.4169	97.7709	95.5096	96.8557	96.8951	89.5841	97.1813	96.6899	98.6274	96.5457	97.4125	95.7409	95.9143	95.6295	97.3368	96.6419	96.399	96.8194	98.4865	97.138	98.0347	98.1728	98.2413	97.7309
2370.59	98.5435	98.4119	98.683	97.0783	98.7797	98.2005	96.8201	97.129	97.3507	93.6541	95.3613	94.9542	95.5723	96.1477	96.2354	97.916	96.9812	96.4666	96.3958	95.0427	96.9029	98.727	99.2131	98.9422	97.3596	97.4608	97.7754	95.5081	96.8731	96.9427	89.6426	97.1739	96.7175	98.6926	96.4768	97.3841	95.7788	95.8104	95.7107	97.3048	96.6329	96.3953	96.7985	98.4792	97.158	98.154	98.1695	98.3378	97.7494
2368.72	98.613	98.4474	98.7008	97.1276	98.8017	98.2342	96.9136	97.1238	97.4001	93.7844	95.353	95.0266	95.5529	96.2048	96.2562	97.9476	97.075	96.5533	96.3919	95.1095	96.9555	98.734	99.1776	98.9491	97.4426	97.5234	97.8046	95.6371	96.833	96.9165	89.7181	97.1997	96.7786	98.6877	96.4888	97.3716	95.7707	95.8341	95.7455	97.313	96.5863	96.4419	96.831	98.5473	97.1078	98.1783	98.1796	98.4124	97.7297
2366.86	98.6666	98.4736	98.6621	97.1	98.7554	98.3669	96.9201	97.1382	97.4338	93.8389	95.3623	95.1288	95.6135	96.1789	96.3243	97.8992	97.0109	96.5588	96.4547	95.0596	97.0122	98.7103	99.1911	98.9055	97.53	97.6083	97.8338	95.6996	96.8347	96.9061	89.6259	97.2556	96.8159	98.6611	96.5331	97.3433	95.7989	95.954	95.6943	97.3449	96.5886	96.4542	96.8144	98.5852	97.1648	98.1074	98.178	98.3129	97.7871
2364.99	98.6222	98.509	98.6938	97.0685	98.7188	98.3375	96.8645	97.1424	97.5103	93.8964	95.5073	95.2475	95.7425	96.2236	96.2897	97.9008	96.9735	96.5515	96.57	95.0787	97.0242	98.7744	99.2402	98.8911	97.4278	97.6397	97.8206	95.6989	96.9057	96.9281	89.6645	97.3496	96.8023	98.713	96.554	97.3544	95.855	96.0891	95.6304	97.3413	96.7272	96.3549	96.8063	98.5034	97.1172	98.115	98.2557	98.1798	97.8543
2363.13	98.5714	98.5206	98.7518	97.127	98.7868	98.2512	96.8868	97.1304	97.5016	93.973	95.658	95.3261	95.698	96.301	96.3296	97.9276	97.0525	96.6465	96.6394	95.1588	97.048	98.8126	99.2773	98.9071	97.3253	97.6204	97.7348	95.705	96.9201	96.8992	89.8039	97.3325	96.7371	98.7486	96.5713	97.3856	95.8624	96.0892	95.6906	97.3869	96.7819	96.3835	96.8584	98.5242	97.0848	98.1628	98.3329	98.1691	97.8962
2361.27	98.5921	98.5482	98.7329	97.1904	98.8315	98.2239	96.9598	97.2091	97.5058	94.0532	95.6795	95.3483	95.6219	96.3654	96.4087	97.9843	97.0838	96.6785	96.6483	95.1671	97.0685	98.8795	99.2889	98.9098	97.3996	97.6002	97.7416	95.7086	96.9483	96.8711	89.8402	97.2414	96.7631	98.745	96.555	97.4181	95.8811	96.0815	95.7579	97.4799	96.7073	96.5029	96.8868	98.4901	97.1679	98.2147	98.3048	98.213	97.846
2359.4	98.6627	98.6266	98.656	97.2429	98.8176	98.192	97.025	97.3278	97.639	94.1427	95.7085	95.4226	95.6498	96.4297	96.388	98.0166	97.0375	96.6474	96.6856	95.1869	97.0262	98.8789	99.2982	98.8799	97.5356	97.6531	97.8249	95.7555	96.9269	96.9325	89.8477	97.2302	96.825	98.7484	96.6077	97.4892	95.9169	96.1649	95.7407	97.5434	96.7208	96.4835	97.0125	98.4891	97.244	98.1541	98.3159	98.3521	97.8302
2357.54	98.6766	98.6371	98.6194	97.2588	98.8401	98.2916	97.093	97.3824	97.6996	94.1883	95.7698	95.563	95.6978	96.4371	96.3997	97.99	97.0471	96.7117	96.7527	95.2435	97.1029	98.8877	99.2644	98.9038	97.54	97.7885	97.9227	95.8847	96.8803	96.9844	89.869	97.2684	96.8013	98.7811	96.7371	97.606	95.9276	96.1855	95.8078	97.5656	96.8344	96.4933	97.058	98.5326	97.1974	98.1418	98.3761	98.4982	97.8598
2355.68	98.6604	98.5862	98.7198	97.2679	98.8268	98.3271	97.1802	97.4031	97.6828	94.2875	95.8528	95.674	95.7622	96.4778	96.491	98.0175	97.1429	96.815	96.7947	95.2784	97.1813	98.9134	99.2503	98.9164	97.4779	97.825	97.9884	95.9761	96.9324	97.0019	89.9728	97.3993	96.826	98.8362	96.7877	97.6434	95.9004	96.2036	95.8655	97.5191	96.9156	96.6221	96.9671	98.4905	97.2359	98.258	98.4107	98.5694	97.8933
2353.81	98.7558	98.6272	98.8238	97.2827	98.8368	98.2973	97.2349	97.4463	97.7278	94.3015	95.9508	95.7293	95.8496	96.5379	96.5016	98.0805	97.1807	96.9365	96.8327	95.328	97.1544	98.92	99.3415	98.9151	97.5545	97.8458	97.9655	96.0124	97.0044	96.9975	90.1371	97.4598	96.8761	98.8683	96.8098	97.6144	95.9868	96.298	95.8829	97.5433	96.9028	96.8041	97.0138	98.474	97.3259	98.3838	98.4047	98.623	97.9303
2351.95	98.9049	98.7012	98.7956	97.2465	98.86	98.2998	97.1959	97.4038	97.7552	94.1697	95.8847	95.6767	95.8858	96.5387	96.4684	98.1069	97.1314	96.9039	96.8135	95.3302	97.1298	98.8644	99.4248	98.9577	97.636	97.8692	97.9819	95.9611	96.9974	97.0362	90.1689	97.3944	96.9318	98.8487	96.773	97.6361	96.0399	96.2984	95.8957	97.6264	96.9295	96.8373	97.0763	98.5596	97.3375	98.3419	98.3909	98.574	97.9392
2350.09	98.9578	98.7003	98.7854	97.1462	98.8197	98.2746	97.0664	97.3156	97.6681	94.0149	95.6522	95.4798	95.7922	96.4268	96.4479	98.0399	97.0459	96.7351	96.6766	95.2326	97.079	98.7366	99.3583	98.9463	97.5703	97.7315	97.9412	95.8292	96.9989	97.0258	89.9798	97.3235	96.908	98.7737	96.7273	97.5936	95.9404	96.108	95.7928	97.5559	96.9271	96.6303	97.0675	98.5933	97.2688	98.1968	98.3176	98.404	97.8736
2348.22	98.9109	98.6331	98.7987	97.0978	98.778	98.2512	96.957	97.245	97.5273	93.8308	95.4432	95.2236	95.6513	96.2884	96.4489	97.9515	96.9744	96.5809	96.5305	95.094	97.011	98.6822	99.2463	98.8582	97.464	97.6029	97.8785	95.7325	96.9783	96.9507	89.7328	97.3206	96.7938	98.7553	96.7314	97.4925	95.8191	95.9281	95.6777	97.3325	96.7438	96.3944	97.0012	98.546	97.2005	98.0961	98.1469	98.2835	97.827
2346.36	98.7903	98.622	98.7768	97.0759	98.7817	98.2197	96.9472	97.2057	97.506	93.7234	95.3841	95.0457	95.5761	96.1965	96.3882	97.9066	96.9806	96.5241	96.4973	95.0051	96.9713	98.695	99.1869	98.788	97.3774	97.5332	97.8644	95.6715	96.9356	96.9135	89.6119	97.2934	96.6911	98.7684	96.6783	97.4588	95.6591	95.824	95.5701	97.1453	96.5351	96.2376	96.9584	98.4965	97.1828	98.061	98.0683	98.2724	97.8952
2344.49	98.7147	98.6334	98.7415	97.032	98.7099	98.1933	96.9132	97.1941	97.5157	93.7408	95.3813	94.9651	95.5579	96.166	96.2848	97.8556	96.9669	96.5041	96.4827	94.9971	96.982	98.7067	99.2412	98.8128	97.3378	97.4903	97.8638	95.623	96.895	96.8884	89.5572	97.2065	96.6726	98.7133	96.5775	97.4163	95.5334	95.7775	95.463	97.0613	96.4591	96.1391	96.9481	98.503	97.1108	98.0504	98.1196	98.2726	97.9159
2342.63	98.6838	98.5752	98.7367	97.0228	98.6765	98.1602	96.8668	97.2055	97.4512	93.8121	95.3744	95.0507	95.5691	96.1916	96.287	97.8615	96.9768	96.5422	96.4668	95.0663	97.042	98.7426	99.2701	98.8357	97.4145	97.5467	97.8001	95.6403	96.8315	96.8515	89.6221	97.2072	96.7186	98.6652	96.6173	97.3974	95.5687	95.7623	95.411	97.055	96.4301	96.125	96.9177	98.57	97.0846	98.0461	98.1488	98.2641	97.8472
2340.77	98.7949	98.6232	98.7982	97.1214	98.7835	98.1745	96.9328	97.266	97.4788	93.8655	95.4571	95.2386	95.6335	96.2363	96.3705	97.9307	97.0392	96.5609	96.5459	95.1287	97.0559	98.7988	99.1991	98.9079	97.4692	97.6585	97.7933	95.6894	96.8723	96.8315	89.7577	97.2482	96.6978	98.7651	96.6771	97.4548	95.6149	95.7965	95.4817	97.1074	96.4513	96.2463	96.9164	98.5676	97.1622	98.0952	98.1477	98.2991	97.888
2338.9	98.8105	98.6982	98.8761	97.1813	98.8615	98.2595	97.0439	97.3693	97.6346	93.8978	95.5587	95.3661	95.7259	96.2941	96.4092	97.9212	97.0671	96.6111	96.6435	95.1626	97.0631	98.8255	99.1815	98.9396	97.5054	97.7437	97.9057	95.7815	96.9182	96.898	89.8336	97.3285	96.7519	98.8005	96.6857	97.589	95.6479	95.8666	95.6008	97.1792	96.5732	96.3845	96.9801	98.5304	97.2338	98.167	98.1723	98.3539	97.9279
2337.04	98.8571	98.7675	98.8913	97.1346	98.8542	98.3086	97.0751	97.3929	97.7278	93.9751	95.6089	95.4055	95.7516	96.3804	96.3842	97.8902	97.0203	96.709	96.7007	95.1959	97.0399	98.803	99.2339	98.9576	97.5718	97.809	97.948	95.8325	96.9683	97.0163	89.8693	97.3497	96.885	98.7598	96.7325	97.641	95.6757	95.9063	95.6231	97.2556	96.633	96.42	97.0404	98.5283	97.3111	98.1614	98.2303	98.3451	97.9554
2335.18	98.8572	98.8023	98.9072	97.1216	98.8852	98.2773	97.0798	97.3917	97.7501	94.0248	95.6837	95.4037	95.8007	96.446	96.4475	97.9878	97.063	96.723	96.6934	95.1951	97.0501	98.7522	99.2728	98.9847	97.591	97.7501	97.9991	95.8832	96.9647	97.0569	89.8759	97.3075	96.9067	98.7977	96.7511	97.6025	95.673	95.9277	95.6148	97.3287	96.6282	96.3435	97.0672	98.5633	97.3123	98.1373	98.2778	98.3137	97.9622
2333.31	98.8815	98.8039	98.9646	97.1422	98.9172	98.2703	97.0834	97.4173	97.7658	94.0421	95.7091	95.4321	95.826	96.4325	96.5297	98.0378	97.1313	96.6944	96.6425	95.144	97.1216	98.8076	99.3261	98.9737	97.528	97.777	98.0576	95.9204	96.9258	97.0083	89.8442	97.2871	96.8788	98.8415	96.7856	97.5984	95.6655	95.983	95.5971	97.3443	96.6205	96.2875	97.0811	98.5778	97.2791	98.1754	98.2936	98.3695	97.9498
2331.45	98.8701	98.8298	98.9994	97.1769	98.8852	98.2884	97.0986	97.4135	97.7842	94.0879	95.7088	95.4883	95.745	96.4074	96.5437	97.9836	97.139	96.7641	96.6483	95.1474	97.1289	98.8475	99.3316	98.9967	97.4969	97.8159	98.0804	95.8772	96.9328	96.9607	89.8598	97.2858	96.8987	98.8156	96.8052	97.6205	95.6995	95.9749	95.5999	97.3409	96.6197	96.3631	97.124	98.5294	97.3201	98.2601	98.2737	98.3937	98.002
2329.59	98.8743	98.8199	98.9983	97.0988	98.7897	98.2677	97.117	97.3852	97.6699	94.1136	95.7298	95.4728	95.7157	96.3949	96.4796	97.931	97.0932	96.7613	96.6572	95.1621	97.0943	98.8158	99.256	98.9983	97.4966	97.7748	98.0341	95.79	96.9753	96.9271	89.8739	97.2779	96.9359	98.7702	96.7703	97.642	95.7089	95.9627	95.6386	97.2852	96.6602	96.4299	97.1538	98.4753	97.326	98.2215	98.2578	98.3484	97.9955
2327.72	98.8226	98.6768	98.8408	96.9808	98.7153	98.1434	96.9968	97.258	97.4973	93.9491	95.5806	95.3396	95.6764	96.3026	96.343	97.8187	96.9592	96.6053	96.5694	95.0591	97.0429	98.6981	99.1199	98.8431	97.3742	97.6377	97.9182	95.6827	96.8808	96.8293	89.7782	97.2167	96.7849	98.7043	96.6147	97.519	95.6783	95.8303	95.5328	97.1249	96.5597	96.2748	96.985	98.503	97.197	97.9999	98.1389	98.2299	97.8879
2325.86	98.8093	98.5164	98.6646	96.8754	98.6327	98.0273	96.7725	97.0976	97.4058	93.7634	95.3473	95.1704	95.5125	96.1579	96.1999	97.666	96.791	96.4858	96.3506	94.9386	96.9801	98.5651	98.947	98.628	97.2128	97.4912	97.7535	95.5916	96.7229	96.7194	89.608	97.2055	96.5905	98.6073	96.4483	97.3218	95.5688	95.6525	95.3729	96.92	96.4009	96.0221	96.8125	98.4871	97.0533	97.8196	97.9746	98.1229	97.8091
2323.99	98.7421	98.4642	98.6452	96.8611	98.6131	98.0536	96.6866	97.1218	97.3717	93.785	95.3592	95.1363	95.4489	96.0647	96.1534	97.7244	96.7117	96.4574	96.3152	94.9227	96.9171	98.5375	98.8862	98.5953	97.202	97.4492	97.6933	95.5701	96.6918	96.6995	89.5602	97.2363	96.598	98.5231	96.4047	97.2848	95.4173	95.6353	95.3358	96.8878	96.32	95.9494	96.8091	98.3965	96.9865	97.7976	97.9019	98.061	97.8039
2322.13	98.7171	98.4591	98.6909	96.8776	98.6227	98.0637	96.7319	97.2157	97.3719	93.8395	95.4989	95.1998	95.5356	96.0569	96.1682	97.7822	96.7739	96.4758	96.4362	94.9066	96.8929	98.5347	98.9465	98.6811	97.2593	97.4628	97.7567	95.5117	96.734	96.7188	89.6178	97.1856	96.6615	98.5559	96.476	97.3434	95.4239	95.6874	95.3449	96.9928	96.2733	96.022	96.8169	98.4131	96.9916	97.8746	97.9187	97.9943	97.8989
2320.27	98.7657	98.4878	98.6985	96.8978	98.6853	97.9831	96.8017	97.2498	97.4351	93.8572	95.5319	95.2435	95.5863	96.176	96.2641	97.7353	96.8518	96.4458	96.4422	94.9119	96.96	98.527	99.0746	98.7068	97.3432	97.4675	97.8263	95.5201	96.751	96.7792	89.682	97.1739	96.6657	98.7019	96.5624	97.4519	95.5189	95.7534	95.3423	97.0735	96.2548	96.1391	96.8799	98.5183	97.0693	97.9163	97.9804	98.0464	97.9269
2318.4	98.7185	98.5839	98.684	96.9549	98.7501	97.9716	96.8589	97.2982	97.5065	93.9109	95.5173	95.2815	95.5534	96.2577	96.3746	97.763	96.8044	96.4878	96.4348	94.9845	96.9886	98.5118	99.1268	98.7503	97.3547	97.4818	97.8591	95.6091	96.7801	96.8174	89.7347	97.2132	96.7069	98.7421	96.6012	97.4944	95.5721	95.7674	95.4111	97.1287	96.3945	96.2082	97.0178	98.5325	97.1139	97.9614	98.0264	98.199	97.909
2316.54	98.724	98.6166	98.7391	96.9868	98.7697	98.0366	96.882	97.3125	97.5364	93.9632	95.5525	95.3153	95.5862	96.2702	96.3817	97.8555	96.8805	96.5824	96.4835	95.0533	97.0132	98.5973	99.0355	98.7624	97.3628	97.5873	97.8804	95.6465	96.8491	96.7952	89.7845	97.1973	96.7644	98.7035	96.6659	97.4248	95.6533	95.7835	95.5254	97.1703	96.4855	96.2053	97.0188	98.4704	97.1677	98.0609	98.0858	98.2329	97.9545
2314.68	98.8054	98.5992	98.7809	96.9061	98.7723	98.0868	96.9204	97.2699	97.5091	93.9944	95.6105	95.3354	95.6124	96.3189	96.3586	97.8937	96.9511	96.5573	96.5387	95.0843	97.0153	98.69	98.9937	98.7463	97.4851	97.6736	97.8689	95.689	96.9409	96.7975	89.8237	97.2215	96.7472	98.6801	96.7121	97.3891	95.7084	95.8357	95.561	97.1767	96.5288	96.2528	96.9257	98.4438	97.2391	98.0825	98.1324	98.2002	97.9213
2312.81	98.8215	98.6598	98.7475	96.8713	98.7784	98.0702	97.0102	97.2897	97.5375	94.0294	95.6327	95.3635	95.6791	96.3067	96.3372	97.9017	96.9445	96.5765	96.5757	95.0974	97.0172	98.6593	99.0862	98.7647	97.4259	97.668	97.922	95.7427	96.9097	96.8049	89.8322	97.2442	96.759	98.7297	96.6792	97.4818	95.6393	95.8498	95.5909	97.2048	96.5966	96.3869	96.906	98.4206	97.2624	98.0595	98.1436	98.1762	97.8791
2310.95	98.7743	98.6803	98.7386	96.9534	98.7609	98.0693	97.0729	97.2817	97.6084	94.0743	95.6454	95.362	95.7218	96.2889	96.351	97.9118	96.9239	96.6417	96.5496	95.0725	97.0438	98.6685	99.1224	98.7969	97.2932	97.6688	97.9985	95.6915	96.8407	96.7691	89.8443	97.2426	96.8415	98.7453	96.6687	97.5664	95.6621	95.8994	95.6291	97.243	96.5992	96.4877	96.9447	98.4523	97.2075	98.0248	98.0906	98.1958	97.9186
2309.08	98.7611	98.6391	98.8252	96.9852	98.7978	98.1161	97.0537	97.2521	97.6184	94.0636	95.6648	95.337	95.7157	96.312	96.3635	97.9195	96.9758	96.6607	96.5245	95.0284	97.0551	98.7057	99.1035	98.7936	97.3174	97.6843	97.9494	95.7104	96.8252	96.7266	89.8632	97.2479	96.8747	98.7428	96.6972	97.5382	95.7616	96.0092	95.5688	97.2738	96.6141	96.5072	96.9976	98.4491	97.2067	97.9914	98.0377	98.22	97.9382
2307.22	98.8227	98.6154	98.9149	97.0096	98.8461	98.1545	96.95	97.2818	97.5866	94.0117	95.6651	95.3476	95.7517	96.3396	96.3388	97.8925	96.9964	96.6445	96.5208	95.0589	97.0424	98.6998	99.0974	98.8062	97.4417	97.7053	97.919	95.7493	96.855	96.841	89.8537	97.2982	96.8431	98.7805	96.6587	97.5116	95.7562	95.9907	95.5763	97.3176	96.6744	96.4928	97.0389	98.4505	97.2866	98.0397	98.0827	98.206	97.9345
2305.36	98.7875	98.6341	98.9127	97.0691	98.8291	98.1747	96.9307	97.3283	97.6155	94.0651	95.6519	95.4121	95.7932	96.4317	96.3797	97.8481	97.0008	96.6217	96.5551	95.1201	97.0667	98.6007	99.0057	98.8154	97.531	97.6992	97.9053	95.7392	96.9144	96.9692	89.9015	97.3233	96.8482	98.7596	96.6344	97.6013	95.6598	95.8784	95.6449	97.3084	96.6659	96.4916	97.0375	98.4816	97.2582	98.083	98.1109	98.2284	97.9595
2303.49	98.8151	98.6581	98.8453	97.0675	98.7741	98.1516	97.0067	97.3337	97.6402	94.1203	95.6642	95.4219	95.775	96.4378	96.4975	97.8251	96.9952	96.6086	96.588	95.0886	97.1066	98.5685	98.9224	98.7698	97.5391	97.7085	97.8987	95.722	96.9745	96.9944	89.887	97.3061	96.8681	98.7292	96.7186	97.6141	95.647	95.846	95.6383	97.3121	96.6775	96.4873	96.9927	98.5202	97.2068	98.0141	98.132	98.213	97.9668
2301.63	98.9091	98.6312	98.8052	96.9833	98.7867	98.1247	97.0022	97.3172	97.566	94.0989	95.6996	95.4089	95.8048	96.4097	96.515	97.8868	97.0154	96.5631	96.5704	95.065	97.1187	98.5893	99.0344	98.7743	97.4578	97.6846	97.9451	95.7062	96.9155	96.9356	89.8828	97.3265	96.8319	98.6997	96.7409	97.5516	95.6957	95.9133	95.6078	97.324	96.7215	96.4791	96.8734	98.5217	97.1823	97.9935	98.105	98.1713	97.9711
2299.77	98.8891	98.6548	98.7873	96.9056	98.7953	98.1476	96.9395	97.2934	97.5236	94.1329	95.6689	95.4394	95.771	96.3672	96.4256	97.8652	97.0169	96.5639	96.5764	95.0903	97.1207	98.5843	99.1131	98.7578	97.3093	97.6505	97.9646	95.7448	96.8714	96.8808	89.887	97.3206	96.8543	98.6333	96.7184	97.5281	95.6891	95.9292	95.6392	97.3237	96.7039	96.4567	96.8926	98.5302	97.1252	97.9743	98.0636	98.2135	98.0131
2297.9	98.838	98.6634	98.7498	96.9424	98.7639	98.1108	96.8975	97.2964	97.5818	94.1649	95.6691	95.4107	95.7523	96.3424	96.4012	97.8027	97.0091	96.6142	96.6022	95.1227	97.1258	98.568	99.1156	98.7308	97.3418	97.6533	97.9207	95.721	96.9472	96.9209	89.8556	97.2981	96.8601	98.6458	96.7621	97.5008	95.6806	95.9505	95.6293	97.3744	96.6731	96.4512	96.9314	98.4865	97.2016	97.9076	98.1102	98.2308	98.033
2296.04	98.8838	98.6496	98.7421	96.9928	98.7478	98.0996	96.8991	97.2829	97.5963	94.0959	95.7576	95.348	95.6984	96.374	96.4163	97.8367	97.0589	96.5885	96.5494	95.0742	97.1156	98.587	99.0977	98.8039	97.4327	97.6419	97.8764	95.6446	96.9101	96.8865	89.8832	97.2664	96.7841	98.702	96.7684	97.5045	95.7521	95.9111	95.5953	97.4185	96.6339	96.4179	96.9101	98.4364	97.2644	97.9573	98.1401	98.2213	97.9822
2294.18	98.9183	98.601	98.7266	96.9672	98.7188	98.1	96.923	97.2675	97.5918	94.0113	95.775	95.3273	95.6288	96.3738	96.3636	97.8537	97.0007	96.5399	96.4783	95.017	97.0638	98.6386	99.074	98.8374	97.4117	97.614	97.9271	95.7054	96.8145	96.7348	89.8977	97.1874	96.7565	98.6994	96.6877	97.5441	95.7161	95.8399	95.5795	97.4129	96.6145	96.3808	96.9373	98.4499	97.2448	97.9712	98.1291	98.281	97.9494
2292.31	98.8253	98.5454	98.6799	96.936	98.724	98.0345	96.9506	97.3175	97.6224	93.9953	95.6523	95.3279	95.6082	96.3747	96.3429	97.8181	96.853	96.5431	96.4556	95.0011	97.0701	98.6292	99.0618	98.7151	97.4272	97.6256	97.9629	95.7666	96.8162	96.7537	89.8482	97.1702	96.773	98.6326	96.5789	97.514	95.6434	95.842	95.5453	97.2774	96.5629	96.4118	96.9798	98.4668	97.2211	97.8983	98.0592	98.2444	97.9597
2290.45	98.8101	98.5166	98.6174	96.9229	98.7015	98.0086	96.918	97.3634	97.6611	93.9818	95.5733	95.3204	95.5388	96.3518	96.3852	97.8562	96.8282	96.5598	96.4634	95.0302	97.0371	98.5763	98.9979	98.6231	97.4115	97.5565	97.8911	95.7481	96.9043	96.7824	89.818	97.2681	96.7487	98.6518	96.5648	97.4582	95.6368	95.8215	95.4912	97.1999	96.4456	96.3886	96.9129	98.5001	97.1373	97.8741	97.9825	98.124	97.9172
2288.58	98.9587	98.4593	98.6161	96.9608	98.6005	97.9583	96.7718	97.3013	97.635	93.9643	95.5405	95.2976	95.5664	96.2074	96.4316	97.8039	96.8978	96.5205	96.4702	95.03	97.0217	98.6089	98.9124	98.5334	97.3437	97.4396	97.7866	95.6547	96.8995	96.7298	89.8686	97.309	96.7045	98.7392	96.5803	97.4448	95.5936	95.8304	95.4474	97.2721	96.5212	96.3075	96.9008	98.4439	97.1105	97.8388	98.0074	98.1177	97.8474
2286.72	98.8604	98.4186	98.659	96.8686	98.6372	97.9107	96.7684	97.2218	97.5268	93.9999	95.5024	95.3486	95.5697	96.1734	96.3821	97.7502	96.9169	96.5101	96.4932	95.0577	97.1064	98.6202	98.938	98.4562	97.3668	97.4467	97.7292	95.5572	96.766	96.8477	89.8696	97.2513	96.6882	98.6957	96.5337	97.4647	95.6332	95.7815	95.5377	97.3297	96.5981	96.2824	96.832	98.3988	97.0916	97.7662	98.0753	98.0922	97.8568
2284.86	98.7392	98.3935	98.6889	96.8184	98.7447	98.0073	96.9016	97.2228	97.4155	94.0381	95.6336	95.4237	95.6032	96.2661	96.3653	97.8509	96.9107	96.5325	96.4767	95.0908	97.0719	98.4816	98.9987	98.525	97.4099	97.5125	97.7952	95.5877	96.7373	96.8609	89.9025	97.2708	96.7598	98.64	96.5576	97.5095	95.7813	95.7198	95.64	97.2775	96.5965	96.3458	96.7904	98.4559	97.0998	97.822	98.1646	98.0393	97.8731
2282.99	98.8219	98.4303	98.7174	96.9074	98.8145	97.9904	96.8998	97.2178	97.42	94.0797	95.7804	95.4322	95.7524	96.241	96.3605	97.8887	96.939	96.5707	96.474	95.0629	96.9912	98.4449	99.0594	98.5421	97.4103	97.5449	97.9501	95.5931	96.8295	96.7951	89.9841	97.2631	96.761	98.5763	96.5914	97.4761	95.8185	95.7792	95.5974	97.221	96.7246	96.3827	96.9377	98.5112	97.1021	97.8771	98.2255	98.167	97.824
2281.13	98.8789	98.5108	98.589	96.8704	98.7774	97.9558	96.8277	97.2426	97.4933	94.2232	95.7926	95.4144	95.8172	96.216	96.3021	97.7899	96.9031	96.6984	96.6014	95.1564	96.9644	98.5632	99.0568	98.6433	97.3585	97.4997	97.9832	95.6197	96.8041	96.8052	89.9108	97.2182	96.7411	98.4774	96.571	97.4208	95.7791	95.8687	95.5768	97.3159	96.7598	96.3714	97.0833	98.5214	97.163	97.9241	98.1894	98.186	97.7847
2279.27	98.7749	98.5673	98.5163	96.8399	98.7623	98.0149	96.8388	97.2185	97.5331	94.2673	95.8151	95.4772	95.8826	96.2549	96.3815	97.7909	96.9887	96.7053	96.6899	95.305	96.9216	98.606	99.0151	98.744	97.3816	97.5736	97.9139	95.7994	96.8205	96.8469	89.9448	97.2672	96.7789	98.5803	96.5845	97.4831	95.7954	95.9721	95.6185	97.365	96.6829	96.3778	97.1597	98.5095	97.186	97.8609	98.0736	98.0467	97.8074
2277.4	98.6838	98.6148	98.6362	96.9583	98.845	98.0403	96.8524	97.1708	97.5505	94.1904	95.8744	95.6564	95.9381	96.3915	96.5552	97.8598	97.0475	96.6389	96.6381	95.207	96.8848	98.5699	98.971	98.6824	97.384	97.5729	97.8861	95.8238	96.9203	96.8723	90.0267	97.2763	96.8499	98.7273	96.6891	97.4824	95.7982	96.0432	95.6416	97.3395	96.7785	96.3824	97.1633	98.5098	97.1264	97.7776	98.0526	98.0822	97.9007
2275.54	98.853	98.53	98.6824	97.0828	98.793	98.0858	96.8551	97.294	97.5931	94.2804	95.8711	95.6983	95.9	96.5368	96.6166	97.9401	96.9493	96.7451	96.6733	95.152	97.0433	98.5882	98.9008	98.6532	97.4204	97.597	97.9422	95.8303	96.9092	96.9367	90.066	97.2764	96.99	98.6905	96.7372	97.5604	95.7831	96.0863	95.7626	97.4046	96.9191	96.3719	97.0815	98.4708	97.1088	97.949	98.1101	98.14	97.9328
2273.68	98.9235	98.4502	98.6593	97.0269	98.7348	98.0846	96.9595	97.3444	97.5675	94.4005	95.8591	95.5916	95.8381	96.5102	96.6675	97.945	96.9398	96.8094	96.7438	95.2691	97.1696	98.6507	99.0075	98.7896	97.3824	97.7552	97.9218	95.8952	96.8849	96.936	90.1183	97.3757	97.0171	98.6831	96.7639	97.6541	95.8477	96.0776	95.9141	97.4291	96.9228	96.4887	96.9789	98.4988	97.2858	98.0888	98.1121	98.1799	97.9123
2271.81	98.7415	98.4815	98.5978	97.0389	98.6865	98.028	97.0707	97.3083	97.564	94.3726	95.9473	95.5774	95.8934	96.5743	96.6914	97.9109	97.0305	96.6647	96.7923	95.3441	97.1521	98.6498	99.0775	98.8111	97.4567	97.6469	97.8471	95.8901	96.9136	96.9227	90.1974	97.3996	96.93	98.75	96.8716	97.5591	95.9846	96.0147	95.8906	97.469	96.7859	96.6754	96.9294	98.6135	97.4336	97.969	98.1627	98.2044	97.9586
2269.95	98.7927	98.4237	98.512	97.081	98.6673	98.1334	97.0289	97.2548	97.5402	94.4467	95.9703	95.674	96.0363	96.7176	96.6286	97.9105	97.1494	96.6954	96.7803	95.3198	97.0987	98.6977	99.1325	98.7056	97.5254	97.5544	97.8319	95.8578	96.978	96.9835	90.2321	97.4718	96.9494	98.7899	96.7504	97.5306	96.0519	96.0096	95.8449	97.6003	96.7748	96.7747	96.9864	98.6057	97.4164	97.9409	98.1205	98.1151	98.0215
2268.08	98.8308	98.4086	98.4492	97.1477	98.7364	98.2138	96.9531	97.356	97.5868	94.5776	95.9682	95.8093	95.9519	96.626	96.6831	97.9793	97.2211	96.84	96.7777	95.3546	97.1352	98.7548	99.2118	98.7827	97.5471	97.6274	97.9428	95.9185	97.1215	96.9496	90.3177	97.5513	96.9034	98.6651	96.6757	97.6204	95.9868	96.1446	95.8428	97.6451	96.9318	96.7913	97.0648	98.4455	97.4025	98.0235	98.0251	98.1127	98.0764
2266.22	98.8021	98.5373	98.5096	97.2341	98.7524	98.0632	97.0564	97.419	97.7058	94.6303	96.1215	95.7845	95.9961	96.4879	96.6548	98.0402	97.166	96.8659	96.7596	95.3859	97.2542	98.6307	99.171	98.9078	97.5091	97.7114	98.1257	96.0387	97.2201	96.9573	90.3885	97.3801	96.8717	98.6469	96.8278	97.7169	95.9083	96.2506	95.8766	97.5909	97.0643	96.7521	97.1581	98.3812	97.4717	98.1783	98.0569	98.2811	98.123
2264.36	98.8567	98.6889	98.6847	97.1928	98.6556	98.0507	97.1918	97.3215	97.7501	94.6917	96.1453	95.7903	96.1415	96.5448	96.5979	98.1352	97.1218	96.7539	96.738	95.4818	97.2248	98.4999	99.1124	98.9523	97.548	97.7951	98.16	96.0431	97.093	97.0341	90.3512	97.278	96.8784	98.7493	96.8684	97.7336	95.9811	96.2909	95.9544	97.6221	97.1008	96.7447	97.1924	98.5759	97.4227	98.3177	98.0374	98.3914	98.092
2262.49	98.9478	98.7011	98.7778	97.1929	98.6135	98.2304	97.0948	97.4126	97.7457	94.5648	96.0048	95.9493	96.2014	96.6479	96.6399	98.1354	97.0261	96.7656	96.785	95.5788	97.2442	98.5512	99.0631	98.8954	97.527	97.8918	98.0435	95.8953	96.9763	97.0813	90.338	97.3866	96.9155	98.7699	96.7221	97.6886	95.9756	96.1598	96.0675	97.6464	97.1384	96.6856	97.1631	98.7469	97.3583	98.153	98.0548	98.3747	98.0597
2260.63	98.9246	98.5269	98.7368	97.1497	98.768	98.2753	97.0471	97.532	97.7989	94.4879	96.0447	95.9566	96.0915	96.5763	96.7108	98.0061	97.0113	96.8198	96.9204	95.5162	97.3504	98.6454	99.0766	98.7146	97.5902	97.8988	97.9708	95.9665	96.9863	97.0347	90.4256	97.4296	97.041	98.6916	96.6956	97.6819	95.915	96.0568	96.2233	97.5098	97.1459	96.6944	97.0934	98.6139	97.361	98.0385	98.2137	98.248	98.0892
2258.77	98.8924	98.4312	98.6337	97.0602	98.8215	98.25	97.1173	97.4819	97.726	94.6626	96.0661	95.7672	95.8611	96.5754	96.8668	98.0461	97.1584	96.8248	96.9607	95.4709	97.2308	98.6979	99.1586	98.6861	97.6786	97.8319	97.8386	95.9919	97.0838	97.0851	90.4099	97.3676	97.0456	98.7103	96.8312	97.7368	96.0505	96.1756	96.2583	97.5012	97.0781	96.8145	96.9239	98.4642	97.3117	98.1813	98.3131	98.2477	98.1488
2256.9	98.9001	98.4683	98.5777	97.1258	98.9086	98.2662	97.2031	97.3352	97.7114	94.7592	96.0822	95.8215	95.8326	96.7036	96.8613	98.2122	97.3149	96.8486	96.8042	95.5243	97.1576	98.7675	99.2267	98.7808	97.5932	97.7517	97.8164	95.9314	97.2094	97.1844	90.3787	97.4139	96.8958	98.7888	97.0963	97.6711	96.0875	96.2183	96.1502	97.749	97.0367	96.7424	96.9974	98.5322	97.3231	98.1689	98.2753	98.4652	98.0849
2255.04	98.8951	98.5036	98.6031	97.1308	99.0547	98.2239	97.1418	97.3201	97.8226	94.6877	96.1767	96.0104	95.9964	96.7553	96.8091	98.1707	97.4224	96.8936	96.6278	95.5371	97.125	98.8471	99.0699	98.8061	97.6316	97.6966	97.9457	95.9105	97.2557	97.168	90.3991	97.5133	96.9022	98.8333	97.1802	97.5875	95.9882	96.1687	96.0668	97.8875	97.069	96.7434	97.1697	98.6403	97.3175	98.0631	98.2382	98.5527	97.9579
2253.17	98.7417	98.562	98.5854	97.0603	98.9436	98.2009	97.0045	97.3952	97.7957	94.6413	96.2358	95.9943	96.177	96.7344	96.7902	98.0772	97.4737	96.9527	96.6371	95.4879	97.0875	98.9099	99.0208	98.7379	97.6361	97.6344	98.1242	96.0989	97.0645	97.0551	90.4192	97.5483	97.1211	98.8066	96.9358	97.699	96.0858	96.1796	96.0027	97.8422	97.0009	96.95	97.1776	98.6782	97.4402	98.0862	98.3059	98.3532	98.0178
2251.31	98.8361	98.6347	98.6704	97.0978	98.7206	98.2622	97.0107	97.4517	97.7934	94.6477	96.183	95.8798	96.2401	96.733	96.7651	98.0555	97.3726	97.0461	96.7933	95.3857	97.164	98.7891	99.1902	98.7631	97.5819	97.6458	98.1783	96.2998	96.9087	96.9996	90.4527	97.6069	97.0953	98.7881	96.8057	97.7136	96.1712	96.2031	96.0546	97.7115	97.0803	96.9593	97.2784	98.6509	97.5756	98.0966	98.308	98.1734	98.0797
2249.45	98.9105	98.6729	98.7622	97.18	98.8148	98.3489	97.1487	97.5183	97.8605	94.7448	96.1526	96.0037	96.1233	96.8252	96.7392	98.0871	97.4118	96.9845	96.8822	95.4443	97.4319	98.5972	99.2114	98.8466	97.7701	97.8974	98.2199	96.2409	96.9653	97.0338	90.5731	97.5805	96.898	98.7763	96.8274	97.5371	96.2015	96.2178	96.0824	97.624	97.2372	96.9009	97.2931	98.6425	97.5079	98.1247	98.1146	98.2502	98.0563
2247.58	98.9101	98.6455	98.7049	97.2292	98.8254	98.2736	97.252	97.528	97.7761	94.8326	96.273	96.1925	96.1101	96.9158	96.6834	98.0743	97.4626	96.9403	96.9106	95.5911	97.5811	98.6353	99.1506	98.7846	97.9502	97.9551	98.1981	96.0642	97.1226	97.0341	90.6698	97.5431	97.0319	98.7751	96.8372	97.515	96.2462	96.2571	96.1352	97.6183	97.3214	96.9374	97.1688	98.7679	97.4964	98.1262	98.1614	98.3612	98.195
2245.72	98.9001	98.5738	98.7113	97.2542	98.611	98.2352	97.2481	97.5645	97.7024	94.7957	96.335	96.2256	96.2599	96.8988	96.6352	97.9932	97.2666	96.9593	96.9588	95.7906	97.4843	98.7789	99.0919	98.7155	97.7929	97.7134	98.0767	96.0548	97.1586	97.0582	90.6203	97.4308	97.1409	98.7454	96.9882	97.6643	96.2386	96.3291	96.1758	97.709	97.3274	97.0481	97.0318	98.772	97.5318	98.1054	98.2905	98.331	98.298
2243.86	98.9303	98.5321	98.8095	97.1004	98.6495	98.2747	97.157	97.5698	97.5746	94.8919	96.3149	96.2077	96.2831	96.8183	96.6938	97.9397	97.1511	96.8957	96.9803	95.8113	97.4103	98.7984	99.2306	98.9085	97.6347	97.6704	98.1231	96.0612	97.1894	97.1156	90.666	97.4351	97.1432	98.6289	96.9211	97.8503	96.2604	96.4157	96.1748	97.728	97.2421	97.0187	97.0373	98.6199	97.4965	97.9995	98.3251	98.3159	98.2072
2241.99	98.7147	98.5261	98.7469	97.0453	98.8791	98.2019	97.049	97.4945	97.6767	95.0346	96.3464	96.253	96.2455	96.765	96.8267	98.0885	97.2365	96.9874	97.0485	95.639	97.4458	98.6728	99.2264	99.1014	97.543	97.7655	98.23	96.02	97.1728	97.1682	90.6784	97.5241	97.0845	98.7336	96.72	97.9938	96.3701	96.4686	96.2073	97.726	97.2666	96.8722	97.1838	98.4506	97.5689	97.9111	98.299	98.3487	98.1085
2240.13	98.5569	98.5911	98.6421	97.2113	98.9569	98.1387	97.0116	97.3535	97.9599	94.9812	96.3539	96.3223	96.2307	96.9197	96.8577	98.1384	97.2323	97.0168	97.0175	95.5414	97.3618	98.6375	99.2226	99.0212	97.615	97.9154	98.1922	96.0246	97.0937	97.0466	90.6438	97.5828	97.1398	98.9282	96.7412	97.9978	96.3842	96.4054	96.2005	97.8062	97.2639	96.957	97.2522	98.5052	97.6225	98.0423	98.288	98.3018	98.1705
2238.27	98.8769	98.717	98.7797	97.2817	98.9146	98.2198	97.0607	97.3466	97.9912	94.9035	96.3259	96.2146	96.2142	97.0547	96.761	98.0455	97.3256	97.0036	97.1082	95.5526	97.2427	98.6659	99.1547	99.0689	97.7149	98.0506	98.1364	96.0825	97.1163	97.0872	90.648	97.6184	97.2447	98.8195	96.7602	97.9595	96.2663	96.2804	96.2933	97.823	97.0716	97.034	97.1389	98.7207	97.5016	98.0606	98.4054	98.3064	98.26
2236.4	99.3436	98.6795	98.8937	97.2872	98.9043	98.2841	97.1631	97.6035	97.8662	94.9376	96.4223	96.05	96.2111	97.0401	96.8126	97.9972	97.3055	96.987	97.1992	95.6534	97.2442	98.6434	99.0325	98.9856	97.8461	97.9076	98.0897	96.2291	97.0973	97.179	90.6498	97.6711	97.2749	98.7081	96.7978	97.8589	96.1987	96.2641	96.3527	97.8217	96.8611	96.9405	97.1275	98.8567	97.4351	98.0137	98.4588	98.5137	98.1965
2234.54	99.2204	98.6013	98.806	97.2464	99.0297	98.29	97.3928	97.7324	97.8698	95.007	96.5618	96.1249	96.2185	97.1095	97.0447	98.067	97.2315	96.9687	97.0917	95.8088	97.3403	98.8411	99.0116	98.8438	97.9055	97.8928	98.1579	96.3394	96.9658	97.2488	90.6744	97.7601	97.272	98.8017	96.9842	97.7986	96.1948	96.3119	96.3495	97.8669	96.9892	96.7904	97.2026	98.7484	97.4478	98.1061	98.2403	98.4465	98.1357
2232.67	98.9124	98.6453	98.6923	97.2071	99.1894	98.3244	97.2657	97.6062	97.8768	95.0091	96.6423	96.5513	96.2293	97.0136	97.3047	98.1751	97.4527	97.0552	97.0348	95.8067	97.3125	98.8628	99.118	98.8914	97.7987	97.8837	98.3112	96.3972	96.9562	97.4174	90.6235	97.7613	97.2055	98.8496	97.1359	97.944	96.211	96.3131	96.4477	97.8658	97.3695	96.8827	97.4121	98.594	97.4774	98.1501	98.1666	98.2514	98.2023
2230.81	98.9534	98.5799	98.5831	97.3182	99.1262	98.2452	97.031	97.6642	97.9677	95.0107	96.6698	96.8228	96.2555	96.887	97.2237	98.3221	97.7169	97.1742	97.0774	95.816	97.3596	98.6725	99.1756	98.9449	97.8851	97.6883	98.3021	96.4308	97.1539	97.333	90.5589	97.7399	97.0321	98.7075	97.0285	98.0472	96.2959	96.3596	96.4297	97.715	97.4971	96.9736	97.5328	98.5715	97.3882	98.183	98.3989	98.3107	98.2128
2228.95	99.0748	98.5429	98.5145	97.2734	98.7651	98.2994	97.2887	97.7601	98.0909	95.1207	96.5743	96.5735	96.3471	96.9786	96.9687	98.3482	97.6491	97.2427	97.1111	95.8088	97.3416	98.7378	99.2424	98.9114	98.0519	97.781	98.3176	96.5723	97.246	97.2445	90.557	97.7256	97.0487	98.7504	96.8456	97.9251	96.5148	96.4583	96.3782	97.6622	97.5441	96.947	97.4408	98.7579	97.4099	98.2283	98.4707	98.2865	98.2363
2227.08	98.8975	98.5455	98.549	97.3461	98.6427	98.4907	97.594	97.6144	98.0083	95.2264	96.4223	96.2578	96.446	97.0202	96.9221	98.2577	97.5567	97.2847	97.0647	95.769	97.3977	98.8987	99.3231	98.8498	97.9929	97.9824	98.4612	96.621	97.1375	97.2135	90.7187	97.7091	97.2424	98.7413	96.9555	97.8164	96.4765	96.4927	96.4157	97.8409	97.653	97.0797	97.3472	98.9231	97.6563	98.139	98.4411	98.1752	98.3745
2225.22	98.9876	98.4922	98.6163	97.3486	98.8162	98.4744	97.386	97.5102	97.9907	95.1363	96.3639	96.1391	96.3222	97.0965	97.1764	98.0938	97.6442	97.1839	97.016	95.8894	97.5833	98.8223	99.185	98.8214	97.8351	97.9835	98.5242	96.3815	97.1467	97.1639	91.0291	97.6011	97.2139	98.6955	97.276	97.9279	96.4977	96.4257	96.5024	98.0246	97.6661	97.2011	97.3205	98.8651	97.8102	98.092	98.4951	98.0439	98.3314
2223.36	99.197	98.6022	98.5532	97.2044	98.9417	98.3479	97.0338	97.6228	98.096	94.9426	96.5846	96.2616	96.272	96.9903	97.1591	98.1124	97.7666	97.2091	97.1262	95.984	97.3408	98.6924	99.0836	98.7898	97.8537	98.0283	98.3781	96.3325	97.2352	97.2268	91.1284	97.4912	97.1882	98.7848	97.3811	97.9563	96.7809	96.2986	96.5007	98.119	97.5161	97.2384	97.2599	98.6836	97.8999	98.2358	98.4644	98.161	98.3028
2221.49	99.1438	98.8018	98.589	97.1597	99.0671	98.2954	97.0016	97.7591	97.9758	94.8953	96.686	96.4805	96.3288	96.9309	96.947	98.3236	97.7268	97.3309	97.2999	96.0521	97.2266	98.5158	99.1315	99.0025	97.7445	98.0228	98.1512	96.4628	97.2519	97.2498	91.0338	97.5844	97.22	98.6955	97.085	97.7334	96.6642	96.3293	96.6014	97.9267	97.3452	97.1962	97.3863	98.517	97.8823	98.304	98.3734	98.5144	98.4595
2219.63	99.0727	98.7809	98.7357	97.0872	99.1306	98.1717	97.2247	97.6759	97.9681	95.0871	96.5454	96.6608	96.4787	97.1176	96.9812	98.1733	97.5072	97.4974	97.1678	96.1713	97.6472	98.4353	99.1727	99.0469	97.5675	98.0052	98.1536	96.4037	97.4154	97.1731	90.9715	97.773	97.2022	98.6785	96.8688	97.7556	96.5229	96.4945	96.5546	97.8648	97.3314	97.1326	97.6012	98.3956	97.7147	98.2739	98.3878	98.5567	98.4378
2217.76	98.9627	98.6154	98.7829	97.1627	99.1124	98.1554	97.5149	97.4884	98.1694	95.2813	96.5639	96.6555	96.5045	97.2596	97.0117	98.0504	97.5326	97.4519	96.9776	96.2145	97.5442	98.7354	99.1169	98.9082	97.7664	97.8439	98.1393	96.3621	97.4147	97.2337	90.9465	97.738	97.341	98.7407	97.0498	97.952	96.6246	96.6286	96.3956	97.9476	97.2829	97.2041	97.4153	98.3975	97.5721	98.0846	98.4097	98.5204	98.1851
2215.9	98.9432	98.6506	98.8024	97.2942	99.178	98.2121	97.4169	97.618	98.1391	95.4014	96.6699	96.5573	96.4443	97.2298	97.2523	98.3301	97.5417	97.3199	97.1251	95.932	97.2946	99.0705	99.1988	99.0405	98.0413	97.7266	98.0731	96.4995	97.2606	97.5617	91.0456	97.5246	97.4628	98.5898	97.1845	98.0244	96.6522	96.6487	96.4355	98.0119	97.2455	97.2603	97.1324	98.58	97.501	97.9883	98.3602	98.6278	98.19
2214.04	99.1086	98.7021	98.7858	97.2291	99.3353	98.2627	97.2017	97.8177	97.9785	95.4119	96.576	96.5832	96.6106	97.2159	97.3238	98.4513	97.6637	97.24	97.2868	95.9323	97.5865	98.9382	99.268	99.0673	97.8529	97.8244	98.1362	96.625	97.3084	97.6557	91.0903	97.7014	97.3487	98.5271	97.2193	98.03	96.7277	96.5709	96.5103	98.0275	97.4427	97.148	97.3343	98.7957	97.6357	98.0581	98.3129	98.5756	98.4091
2212.17	99.1351	98.7364	98.7658	97.2575	99.2557	98.0945	97.2648	97.8133	97.9191	95.4181	96.5853	96.5423	96.711	97.2798	97.278	98.396	97.5435	97.055	97.4113	96.1982	97.709	98.6847	99.2095	98.9998	97.7073	97.9034	98.2659	96.793	97.3543	97.4637	91.0138	97.8392	97.2376	98.6781	97.1304	98.0422	96.7291	96.6553	96.628	97.925	97.5516	97.0226	97.6931	98.828	97.728	98.0165	98.37	98.4744	98.2915
2210.31	99.2297	98.9445	98.7565	97.3845	99.1696	98.1532	97.3215	97.7106	97.8483	95.4829	96.793	96.538	96.6748	97.2142	97.027	98.4194	97.4866	97.1369	97.2745	96.256	97.5651	98.7197	99.0602	99.0132	97.7504	97.9875	98.4315	96.7452	97.2119	97.4375	91.2341	97.707	97.3093	98.8905	97.1266	97.909	96.547	96.7611	96.7229	97.8664	97.5189	97.0366	97.6711	98.6974	97.8764	98.1125	98.6278	98.6165	98.2202
2208.45	99.1697	99.074	98.654	97.3959	99.1071	98.4167	97.2777	97.6542	97.9726	95.5286	96.81	96.4173	96.7696	97.1147	97.0971	98.432	97.5025	97.4051	97.2546	96.1539	97.7038	98.8111	99.0574	98.9801	97.9496	98.209	98.5882	96.6964	97.2258	97.3481	91.4459	97.6749	97.5917	98.9659	97.2065	97.7684	96.2408	96.7173	96.4504	97.9382	97.4033	97.1116	97.5095	98.5697	97.7677	98.2051	98.7096	98.5614	98.3962
2206.58	99.0176	99.0247	98.634	97.3799	99.0218	98.602	97.2072	97.673	98.1067	95.4553	96.7483	96.4512	96.6688	97.1171	97.2195	98.5046	97.5314	97.4068	97.4741	96.1826	97.655	98.8438	99.1871	99.0003	98.0615	98.3978	98.6588	96.609	97.3873	97.2964	91.3942	97.8171	97.7203	98.9266	97.2943	97.8571	96.4365	96.8808	96.1555	98.1184	97.4012	97.2891	97.5309	98.6746	97.5896	98.081	98.542	98.2164	98.5262
2204.72	99.1089	98.7701	98.7872	97.442	98.9666	98.3482	97.3197	97.7213	98.2846	95.3207	96.8253	96.6398	96.622	97.0724	97.1822	98.5845	97.7943	97.4093	97.5258	96.3578	97.5289	98.8019	99.1046	99.0913	98.0429	98.4539	98.7896	96.3823	97.5101	97.3981	91.3865	97.9431	97.6346	98.76	97.3135	98.062	96.736	96.7985	96.1854	98.3407	97.6088	97.2469	97.5427	98.7904	97.6205	97.9854	98.4333	98.0895	98.5506
2202.86	99.3404	98.5557	98.7339	97.5395	99.0514	98.1103	97.5523	97.8472	98.2899	95.3318	96.8601	96.7357	96.7412	97.2132	97.4663	98.4804	97.9494	97.4183	97.5304	96.4075	97.5894	98.923	99.1839	99.1875	98.0353	98.5252	98.7248	96.4798	97.5614	97.6522	91.3389	97.8781	97.4454	98.6868	97.3738	98.1957	96.6797	96.4771	96.2531	98.3979	97.8621	97.1199	97.4893	98.8195	97.5788	98.2165	98.4868	98.156	98.4959
2200.99	99.1197	98.6	98.6993	97.5576	99.2185	98.3601	97.5922	97.8317	98.1435	95.3417	96.7487	96.9355	96.6861	97.1941	97.6743	98.4257	97.7947	97.583	97.4146	96.3275	97.6641	99.1009	99.3953	99.1921	98.0708	98.2755	98.5747	96.555	97.6245	97.8219	91.3064	97.7942	97.2375	98.8783	97.4307	98.0817	96.5413	96.3577	96.3785	98.1015	97.8606	97.2621	97.3349	98.7951	97.4119	98.316	98.4637	98.2081	98.495
2199.13	99.089	98.8014	98.7776	97.4188	99.152	98.3005	97.6114	97.8178	98.1956	95.3747	96.8285	96.9163	96.5954	97.1461	97.1947	98.3548	97.7556	97.688	97.1872	96.1533	97.702	99.1045	99.3362	98.9951	98.0479	97.8693	98.4512	96.4817	97.4776	97.7034	91.4287	97.7383	97.1333	99.0319	97.2132	97.9811	96.5394	96.4984	96.5925	97.763	97.6979	97.4188	97.3805	98.6073	97.4055	98.222	98.4586	98.3895	98.4766
2197.26	99.3485	98.8537	98.6601	97.2645	99.2401	98.2755	97.4759	97.8087	98.3184	95.4894	96.9921	96.7349	96.637	97.3228	97.0223	98.4387	97.66	97.4837	97.4246	96.1408	97.7748	98.9347	99.1805	98.8075	97.867	97.6605	98.1234	96.6226	97.2293	97.3322	91.4302	97.8542	97.2386	98.9751	97.1242	98.035	96.7356	96.7348	96.6001	97.8069	97.6606	97.3109	97.5678	98.6236	97.8136	98.1745	98.5515	98.5836	98.3838
2195.4	99.4555	98.5039	98.6381	97.1668	99.0224	98.2874	97.266	97.6438	98.2216	95.2996	97.043	96.6452	96.7525	97.3173	97.4318	98.4647	97.818	97.3786	97.5333	95.9701	97.531	98.7784	99.0631	98.8409	97.7268	97.7876	98.1557	96.8121	97.2771	97.3973	91.298	98.0656	97.3183	99.007	97.3696	98.046	96.988	96.7536	96.5932	97.9502	97.6548	97.2564	97.6342	98.845	98.0837	98.1517	98.469	98.6522	98.3857
2193.54	99.1571	98.2742	98.8766	97.3325	98.6497	98.2095	97.2189	97.8345	97.9923	95.2486	97.1662	96.6073	96.6274	97.1794	97.5406	98.3042	97.9779	97.5681	97.4946	95.8936	97.5402	98.6952	99.1358	99.0088	97.7018	97.9399	98.3587	96.519	97.4846	97.5651	91.0996	98.1536	97.2957	98.9511	97.5283	97.9385	96.843	96.6632	96.713	97.8602	97.6241	97.4597	97.4574	98.8626	97.9212	97.9644	98.4665	98.7005	98.5673
2191.67	99.1549	98.4536	99.0834	97.5119	98.8155	98.3833	97.18	98.0119	97.9	95.5063	97.0886	96.7798	96.5702	97.3679	97.404	98.2855	97.6548	97.6905	97.3368	96.276	97.7677	98.8752	99.24	99.2125	97.7793	97.9861	98.3256	96.3064	97.4825	97.4346	91.1067	97.8225	97.3107	98.7933	97.334	97.9433	96.6448	96.69	96.7451	97.9258	97.713	97.4038	97.3509	98.8177	97.8818	97.9393	98.485	98.7151	98.7061
2189.81	99.25	98.5709	98.981	97.4079	98.7898	98.3843	97.4583	97.7748	98.0195	95.5919	96.8256	97.0353	96.6843	97.4798	97.4129	98.4235	97.7923	97.806	97.211	96.4232	97.4431	98.8049	99.062	99.1872	98.0177	98.0172	98.3175	96.529	97.5075	97.4145	91.2877	97.5278	97.374	98.7143	97.1532	98.0965	96.7839	96.7178	96.5918	98.0869	97.6844	97.0325	97.3716	98.7249	97.8315	98.0944	98.3963	98.543	98.557
2187.95	99.0282	98.6072	98.5136	97.2328	98.7495	98.0329	97.741	97.3846	98.109	95.6335	96.731	96.9547	96.7887	97.4926	97.2902	98.4139	97.91	97.912	97.3868	96.3711	97.5204	98.5228	99.1051	98.9826	97.9683	97.8667	98.4993	96.7812	97.4066	97.4068	91.2133	97.6099	97.5045	98.5447	97.3699	98.0578	96.997	96.5401	96.6583	98.0286	97.5764	96.8482	97.419	98.6335	97.6034	98.1077	98.3643	98.4107	98.4346
2186.08	98.8165	98.6458	98.1524	97.278	98.8526	98.1006	97.7143	97.4324	98.1601	95.5491	96.96	96.8336	96.7499	97.5774	97.338	98.4889	97.9866	97.7695	97.4962	96.5915	98.1568	98.4423	99.1773	99.0439	98.0084	98.0061	98.5739	96.7591	97.2594	97.3708	91.3975	97.7339	97.5198	98.3435	97.3989	97.966	97.2456	96.542	96.6763	98.0428	97.5762	97.1698	97.6853	98.6204	97.7144	98.3442	98.2544	98.4358	98.3304
2184.22	98.8567	98.5227	98.4639	97.563	99.0622	98.4267	97.3856	97.7254	98.202	95.6542	97.1216	96.9162	97.0657	97.841	97.5517	98.7181	98.1269	97.5068	97.5827	96.6064	98.3008	98.8129	99.2171	99.1559	98.2069	98.2084	98.5827	96.8432	97.296	97.5478	91.718	97.9497	97.6524	98.5891	97.2533	98.1187	97.3616	96.9217	96.7358	98.1839	97.7041	97.6426	97.8622	98.519	97.9583	98.501	98.316	98.529	98.1418
2182.36	98.7449	98.3958	98.7946	97.7452	99.2308	98.6531	97.5188	97.903	98.2141	96.0347	97.2558	97.0089	97.4032	97.8319	97.5857	98.8049	98.3237	97.7734	97.5678	96.5681	98.3708	99.341	99.0442	99.0882	98.2867	98.3571	98.7886	97.0993	97.2793	97.7173	91.9179	98.1962	97.843	98.9064	97.4509	98.3689	97.243	96.9174	96.8307	98.3064	97.9966	97.6588	97.9223	98.4788	97.7895	98.5051	98.5702	98.6304	98.442
2180.49	98.7006	98.5761	98.6577	97.693	99.2893	98.7779	97.737	97.8438	98.2003	96.0653	97.3206	97.2115	97.3978	97.907	97.4717	98.7629	98.284	97.9955	97.5161	96.3818	98.1872	99.526	99.1868	99.0782	98.3576	98.4798	98.6523	97.2786	97.189	97.5587	91.7391	98.0031	97.9114	98.8557	97.5279	98.5112	97.3149	96.6028	96.7365	98.2281	97.975	97.3475	97.8939	98.7483	97.9176	98.5808	98.5334	98.4832	98.8836
2178.63	98.9396	98.6207	98.6086	97.3827	99.323	98.8202	97.7551	97.7469	98.0609	96.0984	97.4552	97.604	97.1401	97.9827	97.5721	98.6189	97.8727	97.9011	97.7653	96.4756	97.6877	99.1007	99.5502	99.1035	98.1512	98.4784	98.3168	97.3484	97.3835	97.4518	91.4056	97.7104	97.7191	98.8027	97.2561	98.3781	97.3474	96.5095	96.8472	98.368	97.9162	97.3189	97.5079	99.1026	98.123	98.4639	98.5381	98.3508	99.0203
2176.76	99.0148	98.5381	98.6772	97.457	99.1361	98.7784	97.8118	97.7765	98.0702	96.1808	97.3799	97.7063	96.7077	97.5941	97.6957	98.5358	97.9288	97.8704	98.0206	96.7662	97.6215	98.742	99.5399	99.154	97.9511	98.7117	98.2182	97.4071	97.7751	97.5925	91.6912	97.7763	97.6317	98.8527	97.0524	98.1371	97.2101	96.8906	96.9929	98.5722	98.1878	97.6224	97.264	99.1253	98.0426	98.4981	98.6892	98.5208	98.9684
2174.9	98.9168	98.7958	98.7349	97.6995	99.0254	98.5066	97.6534	98.031	98.1889	96.1169	97.354	97.6024	96.7373	97.4759	97.7339	98.4697	98.2818	97.8353	97.938	96.7311	97.8131	98.8573	99.4151	99.0143	98.0944	98.7205	98.3486	97.2718	97.7831	97.9064	91.807	98.1413	97.7386	98.8798	97.1985	98.148	97.1942	97.251	97.0166	98.6132	98.3369	97.7626	97.3924	98.947	98.1099	98.5853	98.6883	98.4513	98.6599
2173.04	99.1343	98.8249	98.751	97.8347	99.1272	98.2238	97.6316	98.1943	98.1637	95.9978	97.6281	97.4987	97.1299	97.6956	97.8773	98.4635	98.44	97.7488	97.7171	96.3581	97.8785	98.9379	99.3332	98.8656	97.9983	98.5677	98.5627	97.2995	97.5357	97.9792	91.7204	98.303	97.8609	99.1251	97.4887	98.2599	97.0939	97.1311	96.8985	98.5032	98.4912	97.6626	97.3758	98.8458	98.0409	98.3864	98.5367	98.1518	98.5092
2171.17	99.2221	98.6257	98.6413	97.544	99.0863	98.1512	97.6973	98.0129	98.2236	95.8921	97.3967	97.4676	96.9881	97.6556	97.7418	98.5526	98.0913	97.7202	97.7754	96.4223	98.0934	98.9955	99.0293	98.9939	97.6549	98.5348	98.557	97.2148	97.5426	97.5371	91.6569	98.0652	97.4902	99.0735	97.4187	98.2572	96.9098	97.0227	96.6669	98.4103	98.371	97.8175	97.2507	98.8544	97.6861	98.1248	98.3034	98.0788	98.6236
2169.31	99.2255	98.668	98.3688	97.2837	99.1153	98.2643	97.4176	97.8218	98.3792	95.9919	97.0563	97.4236	96.808	97.532	97.5245	98.2558	97.829	97.6416	97.7692	96.5227	97.9251	98.9287	98.7938	99.0503	97.83	98.4246	98.5842	96.929	97.5179	97.2827	91.8274	97.9235	97.1611	98.7913	97.3761	98.4653	97.1262	96.8701	96.7408	98.5368	97.8424	97.972	97.3541	98.8068	97.4371	97.9274	98.456	98.2103	98.8075
2167.45	99.0521	98.6321	98.1972	97.2468	99.2589	98.5279	97.1931	97.9315	98.299	95.831	97.0559	97.2591	96.845	97.6124	97.584	98.0545	98.0983	97.6016	97.4709	96.4573	97.7127	98.6622	98.8246	98.776	98.0451	97.9999	98.427	96.9588	97.5438	97.5671	91.8745	97.9199	97.4414	98.6824	97.4327	98.1809	97.5031	96.8169	96.8739	98.2679	97.4691	97.4487	97.5796	98.5364	97.4424	97.6997	98.8012	98.3721	98.8859
2165.58	99.0392	98.6583	98.3756	97.2552	99.229	98.6938	97.1532	97.813	98.0219	95.3807	96.8945	96.9258	96.6463	97.8187	97.3181	98.2847	98.1786	97.9144	97.3987	96.5553	97.9046	98.702	99.0101	98.8339	98.0605	97.7143	98.4546	97.135	97.7055	97.9715	91.5747	98.0699	97.6085	98.6147	97.0811	97.6534	97.4066	96.8604	96.7911	97.8645	97.4764	96.9878	97.6787	98.3021	97.6195	97.6695	98.6105	98.435	98.572
2163.72	98.8126	98.5759	98.4939	97.3036	99.3368	98.5114	97.1372	97.4837	97.8931	95.4211	96.7568	96.9559	96.4977	98.0259	97.2234	98.3857	98.0198	98.0088	97.8965	96.6946	97.9518	98.8885	99.0597	98.8279	98.0179	97.9889	98.4	97.1052	97.6972	98.3118	91.5672	97.8515	97.286	98.4272	96.8167	97.9077	97.1854	96.7503	96.72	98.0067	97.4986	97.0181	97.6075	98.1565	97.7317	97.9239	98.2273	98.1304	98.1189
2161.85	98.6197	98.3249	98.4747	97.2851	99.4262	98.5215	97.4359	97.4647	97.8867	95.9957	96.9644	97.6051	96.7089	98.2837	97.9326	98.8164	97.9839	97.7798	98.2607	96.6933	97.8077	99.1294	99.1516	98.8498	98.0812	98.2477	98.3428	97.4954	97.5204	98.2315	92.1729	97.908	97.4756	98.3236	97.1529	98.4987	97.4082	96.4815	96.8492	98.374	97.6735	97.4368	97.3366	98.3424	97.9632	98.038	98.2361	98.0178	98.2695
2159.99	99.0794	98.4113	99.083	98.0049	99.7998	98.9053	98.1819	98.2779	98.3344	96.7603	97.8641	98.3396	97.0439	98.6335	98.7205	99.3961	98.9005	98.344	98.4188	97.056	98.325	99.4072	99.3004	99.3646	98.6977	98.6476	98.8463	97.9177	97.5579	97.918	92.6772	98.1687	97.9609	98.8811	97.5504	98.6931	97.7647	96.976	97.4845	98.5032	98.2397	98.1952	97.4849	98.7862	98.333	98.4764	98.8308	98.832	98.6565
2158.13	99.6552	98.8908	99.4703	98.4462	99.9398	99.2612	98.6556	98.8326	98.8086	97.2567	98.4167	98.4144	97.6593	98.8414	98.9514	99.8293	99.4098	98.9432	98.7325	97.1593	98.7275	99.4953	99.516	100.183	99.0781	99.3033	99.0262	97.7544	97.9783	97.9021	92.7651	98.4313	98.0282	99.5188	97.6541	98.7709	97.9049	97.7716	98.1938	98.8307	98.8362	98.7316	97.9931	99.2935	98.5127	99.0951	99.4577	99.2425	98.7236
2156.26	99.4067	99.1752	99.1414	98.1413	99.5154	99.2324	98.3968	98.5872	99.2194	97.1887	98.0515	98.1773	97.9096	98.5436	98.8807	99.703	99.0724	98.9912	98.7479	97.4014	98.8722	99.5989	99.6826	100.313	99.1067	99.442	99.0023	97.7703	98.4778	97.9159	92.6506	98.5827	97.9591	99.5582	97.9541	98.7612	98.1119	97.6891	98.1931	99.3385	99.1053	98.4853	98.2013	99.3597	98.5163	99.1069	99.3514	98.9924	99.1341
2154.4	99.5635	99.2903	99.1067	98.0637	99.782	99.0935	98.1463	98.643	99.3893	96.9149	98.0079	98.1056	97.6731	98.3132	98.7023	99.5724	98.8185	98.7648	98.567	97.8566	98.7178	99.7225	99.7619	99.8027	98.7301	99.4334	99.2613	97.9499	98.5906	98.1265	92.3243	98.5549	98.0195	99.5162	98.1843	98.4951	98.0804	97.4371	98.0048	99.6095	98.8983	98.1669	98.3243	98.881	98.2501	98.9	98.8545	99.0408	99.2442
2152.54	99.7136	99.5519	99.2566	98.2029	99.9651	98.9249	98.1294	98.7525	99.1758	96.6275	98.3566	98.2053	97.9136	98.4	98.055	99.6908	98.9715	98.7386	98.5785	97.7898	98.3962	99.494	99.7667	99.7681	98.4073	99.0897	99.3856	97.8705	98.4587	98.1153	92.4711	98.6015	98.0091	99.281	98.1482	98.1686	97.7953	97.2967	97.5599	99.4119	98.7153	98.4356	98.439	98.4863	98.158	98.8029	98.6913	99.1794	98.7648
2150.67	99.6294	99.4272	99.1583	98.1996	99.3892	98.7847	97.9794	98.52	98.7226	96.5032	98.0955	97.9832	98.0217	98.4546	97.9147	99.4197	98.988	98.588	98.5374	97.4653	98.1428	99.3979	99.754	99.6696	98.732	98.5197	99.2936	97.647	98.3547	97.8136	92.4787	98.6536	97.7856	99.2023	98.0341	98.2589	97.8392	97.3569	97.288	99.0025	98.8252	98.5353	98.228	98.6125	98.4345	98.9117	98.7891	99.147	98.7596
2148.81	99.3542	99.1691	99.0989	97.8932	99.1539	98.964	97.9091	98.4618	98.7627	96.5447	97.6465	97.8113	97.7951	98.4239	98.2864	99.1891	98.7778	98.418	98.2379	97.4013	98.0984	99.3115	99.8724	99.6043	98.7813	98.8238	99.0999	97.4782	97.9551	97.7725	92.18	98.539	97.5569	99.2418	98.0109	98.4833	97.8683	97.4499	97.3269	98.76	98.7526	98.4418	98.011	98.7963	98.2773	99.0024	98.9875	99.1129	99.2077
2146.95	99.4633	99.2817	99.2193	97.6618	99.3653	98.8593	97.9382	98.3506	98.9096	96.3788	97.6058	97.623	97.642	98.1882	98.3202	99.0505	98.668	98.624	98.1661	97.3365	98.1909	99.3404	99.5714	99.5642	98.7685	99.0083	99.0664	97.491	97.7312	97.9746	92.0293	98.2664	97.7894	99.3898	97.9832	98.661	97.575	97.4914	97.3261	98.6892	98.4133	98.3391	98.147	98.7971	97.9363	98.9175	99.1367	98.8696	99.2128
2145.08	99.6577	99.359	99.3755	97.6892	99.5264	98.659	98.2057	98.3681	98.79	96.2969	97.5675	97.3334	97.4591	98.1134	97.9259	98.8635	98.8767	98.3845	98.1795	96.9994	98.1945	99.4702	99.308	99.4063	98.6953	98.7773	99.1703	97.5283	97.7202	98.185	91.8723	97.8878	98.128	99.3396	97.8346	98.6167	97.1968	97.392	97.322	98.5592	98.1525	98.1263	98.2081	98.8349	97.9072	98.6745	99	98.5314	98.7823
2143.22	99.7048	99.352	99.27	97.858	99.496	98.7957	98.1453	98.4536	98.823	96.4122	97.5495	97.4784	97.3662	98.0578	97.976	98.9496	98.9989	98.1407	97.9645	97.0003	98.0526	99.378	99.6088	99.3796	98.73	98.6289	99.0628	97.5084	97.9524	98.1414	91.794	97.928	98.112	99.1222	97.7271	98.5104	97.0938	97.0965	97.4163	98.5499	98.2839	98.0633	97.9805	98.9287	98.0025	98.5665	98.8468	98.5869	98.5058
2141.35	99.5658	99.2153	98.8881	98.105	99.4621	98.8211	97.8895	98.4118	98.6734	96.2584	97.6198	97.6542	97.2272	98.0392	98.1023	99.2397	98.895	98.1645	97.9161	97.0089	97.9956	99.2473	99.9323	99.4167	98.9527	98.7505	98.8088	97.4227	98.1168	97.8824	91.6858	98.223	97.9887	99.0283	97.7562	98.739	97.14	97.0082	97.5091	98.8334	98.4205	98.1501	97.8345	98.9285	98.0347	98.7732	98.8109	98.8535	98.5945
2139.49	99.2536	99.0107	98.8336	97.9883	99.2247	98.6822	97.8327	98.2717	98.4227	96.0614	97.4992	97.4934	97.2059	97.9582	98.0019	99.3053	98.7906	98.1654	97.9441	96.9416	97.8506	99.3495	99.9093	99.5012	98.7806	98.9308	98.9007	97.3523	98.0249	97.7679	91.6548	98.2337	98.0775	99.0052	97.6428	98.6551	97.2267	97.0472	97.2856	98.8049	98.3983	98.0769	97.6678	98.862	98.1316	98.8592	98.8715	98.7887	98.7417
2137.63	99.0176	99.0128	98.9876	97.8915	99.1584	98.6714	97.9249	98.3426	98.5748	96.0173	97.5431	97.3246	97.1632	97.9467	97.9686	99.175	98.7274	98.0686	97.9775	97.0035	97.8302	99.4823	99.6375	99.5901	98.5566	98.8279	99.1375	97.2832	98.0771	97.792	92.0017	98.0892	98.104	98.9763	97.6051	98.3765	97.2914	97.1166	97.0822	98.6262	98.4646	97.8526	97.7145	98.8549	98.0855	98.8795	99.0217	98.7425	98.7405
2135.76	98.984	99.2293	99.1137	97.7853	99.4122	98.8549	97.765	98.5283	98.7839	96.0672	97.5864	97.4886	97.188	98.0131	97.9345	99.1683	98.5465	98.2319	97.9784	96.8247	98.0119	99.5985	99.564	99.7204	98.5165	98.7419	99.0948	97.4063	98.1494	97.8857	92.0909	98.1649	98.077	99.294	97.8021	98.6032	97.2574	97.2857	97.1303	98.8177	98.4527	97.9174	97.8324	99.0276	98.0113	99.0198	98.9778	99.0975	98.717
2133.9	99.138	99.3326	99.2018	97.7425	99.5374	99.0227	97.6918	98.5059	98.7124	96.1976	97.5474	97.6883	97.2388	98.0981	97.8633	99.1528	98.3873	98.3193	98.0858	96.6954	98.0226	99.5753	99.5888	99.692	98.6073	98.7466	98.9557	97.4809	97.967	97.8567	92.0449	98.2283	97.9954	99.4658	97.9333	98.7614	97.2232	97.2804	97.1659	98.8189	98.3659	97.9849	97.7885	98.9301	98.0375	99.0503	98.8478	99.3154	98.8249
[truncated: 823 more rows]
[truncated: 159 more columns]

## Sheet: Standards
Wavenumber	PVC-1-1	PVC-1-2	PVC-1-3	PVC-1-4	PVC-1-5	PVC-1-6	PVC-1-7	PVC-2-1	PVC-2-2	PVC-2-3	PVC-2-4	PVC-2-5		PE-1-1	PE-1-2	PE-1-3	PE-1-4	PE-1-5	PE-1-6	PE-1-7	PE-2-1	PE-2-2	PE-2-3	PE-2-4	PE-2-5		PET-1-1	PET-1-2	PET-1-3	PET-1-4	PET-1-5		PP-1-1	PP-1-2	PP-1-3	PP-1-4	PP-1-5		PS-1-1	PS-1-2	PS-1-3	PS-1-4	PS-1-5	PS-2-1	PS-2-2	PS-2-3	PS-2-4	PS-2-5
[truncated: 1,825 more rows]

## Sheet: ConsumerProducts
Wavenumber (/cm)	PVC-Com-1-1	PVC-Com-1-2	PVC-Com-1-3	PVC-Com-2-1	PVC-Com-2-2	PVC-Com-2-3	PVC-Com-3-1	PVC-Com-3-2	PVC-Com-3-3	PVC-Com-4-1	PVC-Com-4-2	PVC-Com-4-3	PVC-Com-5-1	PVC-Com-5-2	PVC-Com-5-3	PVC-Com-6-1	PVC-Com-6-2	PVC-Com-6-3	PVC-Com-7-1	PVC-Com-7-2	PVC-Com-7-3	PVC-Com-8-1	PVC-Com-8-2	PVC-Com-8-3		PE-Com-1-1	PE-Com-1-2	PE-Com-1-3	PE-Com-2-1	PE-Com-2-2	PE-Com-2-3	PE-Com-3-1	PE-Com-3-2	PE-Com-3-3	PE-Com-4-1	PE-Com-4-2	PE-Com-4-3	PE-Com-5-1	PE-Com-5-2	PE-Com-5-3	PE-Com-5-4	PE-Com-5-5	PE-Com-5-6	PE-Com-5-7	PE-Com-6-1	PE-Com-6-2	PE-Com-6-3	PE-Com-6-4	PE-Com-6-5
[truncated: 1,825 more rows]
[truncated: 152 more columns]

[truncated: 1 more sheets: ID]
